# Supplementary material
Source: PubMed Central journal article supplement (PMC6813579)
Supplement: jamapsychiatry-77-86-s001.pdf [file jamapsychiatry-77-86-s001.pdf]

## Supplementary Online Content

MacDonald ML, Garver M, Newman J, et al. Synaptic proteome alterations in the primary auditory cortex of individuals with schizophrenia. *JAMA Psychiatry*. Published online October 23, 2019. doi: 10.1001/jamapsychiatry.2019.2974

**eTable 1.** Participant Demographics

**eTable 2.** Synaptosome Enrichment

**eTable 3.** Mouse Homogenate PMI

**eTable 4.** Mouse Synaptosome PMI

**eTable 5.** Monkey APD Homogenate

**eTable 6.** Monkey APD Synaptosome

**eTable 7.** Eigenprotein Human Homogenate

**eTable 8.** Eigenprotein Human Synaptosome

**eTable 9.** Homogenate Modules DAVID

**eTable 10.** Synaptosome Modules DAVID

**eTable 11.** Module Eigenprotein Differences

**eTable 12.** Aligned Sz-Control Homogenate Proteome and Transcriptome Findings

**eTable 13.** Aligned Sz-Control Synaptosome Proteome and Transcriptome Findings

**eTable 14.** List of Protein SRMs from Assay Stages

**eMethods.** Participants and Materials

**eFigure 1.** Synaptosome Yield, PMI, and pH in Human Tissue

**eFigure 2.** Distribution of Technical and Variance in Peptide Quantification

**eFigure 3.** Homogenate Protein Levels and PMI in Mice

**eFigure 4.** Synaptosome Protein Levels and PMI

**eFigure 5.** Exploratory Module Preservation Analysis

**eFigure 6.** Homogenate and Synaptosome Protein Networks

**eFigure 7.** Comparison of Antipsychotic Drug Effects and Sz Alterations

**eFigures 8-13.** Expanded Chord Diagrams for All Homogenate and Synaptosome Modules

**eFigure 14.** Associations Between Module Eigenprotein Values

**eFigure 15.** Comparison of Proteomic and Transcriptomic Analysis of Sz Tissue

**eReferences.**

This supplementary material has been provided by the authors to give readers additional information about their work.

**eTable 1. Participant Demographics**

| Pair | Group | HU    | Sex | Race | Age | PMI  | pH  | MOD        | COD                         | Storage Time (Mo) | Diag        | Hand |
|------|-------|-------|-----|------|-----|------|-----|------------|-----------------------------|-------------------|-------------|------|
| 1    | C     | 1326  | M   | W    | 58  | 16.4 | 6.7 | Natural    | ASCVD                       | 119.8             | None        | R    |
| 2    | C     | 1247  | F   | W    | 58  | 22.7 | 6.4 | Natural    | ASCVD                       | 133.9666667       | None        | R    |
| 3    | C     | 1086  | M   | W    | 51  | 24.2 | 6.8 | Natural    | ASCVD                       | 153.8333333       | None        | R    |
| 4    | C     | 10005 | M   | W    | 42  | 23.5 | 6.7 | Accidental | Trauma                      | 140.6666667       | None        | R    |
| 5    | C     | 1201  | F   | W    | 52  | 16.4 | 6.2 | Natural    | ASCVD                       | 141.1             | None        | R    |
| 6    | C     | 1255  | M   | B    | 37  | 22   | 5.9 | Natural    | Pulmonary embolism          | 132.4             | None        | R    |
| 7    | C     | 1480  | M   | W    | 62  | 20.1 | 6.7 | Natural    | ASCVD                       | 92.93333333       | Reading D/O | R    |
| 8    | C     | 1119  | M   | W    | 57  | 20.2 | 6.8 | Natural    | ASCVD                       | 149.8666667       | None        | R    |
| 9    | C     | 1317  | M   | W    | 56  | 22.9 | 6.5 | Natural    | ASCVD                       | 122.3             | None        | L    |
| 10   | C     | 1307  | M   | B    | 32  | 4.8  | 6.7 | Natural    | ASCVD                       | 123.2333333       | None        | R    |
| 11   | C     | 1067  | M   | W    | 49  | 6    | 6.6 | Natural    | ASCVD                       | 156.7333333       | None        | R    |
| 12   | C     | 1196  | F   | W    | 36  | 14.5 | 6.4 | Accidental | Asphyxiation                | 141.7333333       | None        | R    |
| 13   | C     | 1099  | F   | W    | 24  | 9.1  | 6.5 | Natural    | Cardiomyopathy              | 152.2333333       | None        | R    |
| 14   | C     | 806   | M   | W    | 57  | 24   | 6.9 | Natural    | Pulmonary embolism          | 204.2333333       | None        | R    |
| 15   | C     | 739   | M   | W    | 40  | 15.8 | 6.9 | Natural    | ASCVD                       | 218.0333333       | None        | R    |
| 16   | C     | 822   | M   | B    | 28  | 25.3 | 7   | Natural    | ASCVD                       | 201.6666667       | None        | L    |
| 17   | C     | 727   | M   | B    | 19  | 7    | 7.2 | Accidental | Trauma                      | 218.9333333       | None        | R    |
| 18   | C     | 659   | M   | O    | 46  | 22.2 | 6.9 | Accidental | Peritonitis                 | 229.4             | None        | R    |
| 19   | C     | 852   | M   | W    | 54  | 8    | 6.8 | Natural    | Cardiac Tamponade           | 193.9333333       | None        | R    |
| 20   | C     | 685   | M   | W    | 56  | 14.5 | 6.6 | Natural    | Hypoplastic coronary artery | 225.5             | None        | R    |
| 21   | C     | 686   | F   | W    | 52  | 22.6 | 7   | Natural    | ASCVD                       | 225.2             | None        | R    |
| 22   | C     | 1092  | F   | B    | 40  | 16.6 | 6.8 | Natural    | Mitral valve prolapse       | 153.2333333       | None        | R    |
| 23   | C     | 1488  | M   | B    | 39  | 21.5 | 6.4 | Natural    | Pulmonary embolism          | 92                | None        | R    |
| 24   | C     | 1047  | M   | W    | 43  | 13.8 | 6.6 | Natural    | ASCVD                       | 159.8666667       | None        | R    |
| 25   | C     | 700   | M   | W    | 42  | 26.1 | 7   | Natural    | ASCVD                       | 223.1333333       | None        | R    |
| 26   | C     | 818   | F   | W    | 67  | 24   | 7.1 | Accidental | Anaphylactic reaction       | 202.8333333       | None        | R    |
| 27   | C     | 567   | F   | W    | 46  | 15   | 6.7 | Natural    | Mitral valve prolapse       | 242.6666667       | None        | R    |
| 28   | C     | 871   | M   | W    | 28  | 16.5 | 7.1 | Accidental | Trauma                      | 190.9             | None        | R    |
| 29   | C     | 988   | M   | W    | 82  | 22.5 | 6.2 | Accidental | Trauma                      | 169.1666667       | None        | R    |
| 30   | C     | 1284  | M   | W    | 55  | 6.4  | 6.8 | Natural    | ASCVD                       | 128.3333333       | None        | R    |
| 31   | C     | 1555  | M   | W    | 17  | 15.1 | 6.9 | Accidental | Trauma                      | 77.53333333       | None        | R    |

|             |              |           |            |             |            |            |           |            |                             |                          |                                     |             |
|-------------|--------------|-----------|------------|-------------|------------|------------|-----------|------------|-----------------------------|--------------------------|-------------------------------------|-------------|
| 32          | C            | 1268      | M          | B           | 49         | 19.9       | 7.1       | Natural    | ASCVD                       | 120.5333333              | None                                | R           |
| 33          | C            | 1466      | F          | B           | 64         | 20         | 6.7       | Accidental | Trauma                      | 95.03333333              | None                                | R           |
| 34          | C            | 1386      | M          | W           | 46         | 21.2       | 6.7       | Natural    | ASCVD                       | 109.6666667              | None                                | R           |
| 35          | C            | 1026      | M          | W           | 59         | 19.8       | 6.3       | Natural    | ASCVD                       | 162.9                    | None                                | R           |
| 36          | C            | 1524      | M          | W           | 66         | 9.4        | 6.4       | Natural    | Small intestinal infarction | 82.2                     | None                                | R           |
| 37          | C            | 1270      | F          | W           | 73         | 19.7       | 6.6       | Accidental | Trauma                      | 130.4                    | None                                | R           |
| 38          | C            | 1372      | M          | W           | 37         | 20.5       | 6.6       | Accidental | Asphyxiation                | 113.4333333              | None                                | U           |
| 39          | C            | 1543      | F          | W           | 45         | 17.9       | 6.8       | Natural    | Subarachnoid hemorrhage     | 79.2                     | None                                | R           |
| 40          | C            | 1583      | M          | W           | 58         | 19.1       | 6.7       | Accidental | Trauma                      | 72.33333333              | None                                | R           |
| 41          | C            | 1384      | M          | W           | 67         | 21.9       | 6.6       | Natural    | ASCVD                       | 110.8333333              | None                                | R           |
| 42          | C            | 630       | M          | W           | 64         | 21.2       | 7         | Natural    | ASCVD                       | 232.6                    | None                                | R           |
| 43          | C            | 546       | F          | W           | 37         | 23.5       | 6.7       | Natural    | ASCVD                       | 246.7                    | unconfirmed                         | U           |
| 44          | C            | 681       | M          | W           | 51         | 11.6       | 7.2       | Natural    | Hypertrophic cardiomyopathy | 226.1                    | None                                | R           |
| 45          | C            | 1374      | M          | W           | 43         | 21.7       | 6.6       | Natural    | ASCVD                       | 112.9666667              | None                                | R           |
| 46          | C            | 1159      | M          | W           | 51         | 16.7       | 6.5       | Natural    | ASCVD                       | 146                      | None                                | R           |
| 47          | C            | 857       | M          | W           | 48         | 16.6       | 6.7       | Natural    | ASCVD                       | 192.7333333              | None                                | L           |
| 48          | C            | 1391      | F          | W           | 51         | 7.8        | 6.6       | Natural    | ASCVD                       | 108.9666667              | None                                | L           |
|             |              |           |            |             |            |            |           |            |                             |                          |                                     |             |
| <b>Pair</b> | <b>Group</b> | <b>HU</b> | <b>Sex</b> | <b>Race</b> | <b>Age</b> | <b>PMI</b> | <b>pH</b> | <b>MOD</b> | <b>COD</b>                  | <b>Storage Time (Mo)</b> | <b>Diag</b>                         | <b>Hand</b> |
| 1           | Sz           | 1453      | M          | W           | 62         | 11.1       | 6.4       | Accidental | Trauma                      | 97.33333333              | Paranoid schizophrenia; ADR         | R           |
| 2           | Sz           | 1240      | F          | B           | 50         | 22.9       | 6.3       | Natural    | ASCVD                       | 134.7                    | Undifferentiated schizophrenia; ADR | R           |
| 3           | Sz           | 10025     | M          | B           | 52         | 27.1       | 6.7       | Natural    | ASCVD                       | 132.5666667              | Disorganized schizophrenia; OAR     | R           |
| 4           | Sz           | 1256      | M          | W           | 34         | 27.4       | 6.4       | Suicide    | Hanging                     | 132.4                    | Undifferentiated schizophrenia      | R           |
| 5           | Sz           | 1189      | F          | W           | 47         | 14.4       | 6.4       | Suicide    | Combined drug overdose      | 142.6                    | Schizoaffective disorder; AAR       | R           |
| 6           | Sz           | 10020     | M          | W           | 38         | 28.8       | 6.6       | Suicide    | Salicylate overdose         | 134.0333333              | Paranoid schizophrenia; AAC; OAC    | R           |
| 7           | Sz           | 1263      | M          | W           | 62         | 22.7       | 7.1       | Accidental | Asphyxiation                | 131.5666667              | Undifferentiated schizophrenia; ADR | R           |
| 8           | Sz           | 1173      | M          | W           | 62         | 22.9       | 6.4       | Natural    | ASCVD                       | 144.7                    | Disorganized schizophrenia; ADR     | R           |
| 9           | Sz           | 1361      | M          | W           | 63         | 23.2       | 6.4       | Natural    | Cardiomyopathy              | 115                      | Schizoaffective disorder; ODC       | U           |
| 10          | Sz           | 10024     | M          | B           | 37         | 6          | 6.1       | Natural    | ASCVD                       | 132.7666667              | Paranoid schizophrenia              | L           |
| 11          | Sz           | 1296      | M          | W           | 48         | 7.8        | 6.5       | Natural    | Pneumonia                   | 126                      | Undifferentiated schizophrenia      | L           |
| 12          | Sz           | 1211      | F          | W           | 41         | 20.1       | 6.3       | Natural    | Sudden unexpected death     | 140.1333333              | Schizoaffective disorder            | L           |
| 13          | Sz           | 10023     | F          | B           | 25         | 20.1       | 6.7       | Suicide    | Drowning                    | 133.2333333              | Disorganized schizophrenia          | R           |
| 14          | Sz           | 665       | M          | B           | 59         | 28.1       | 6.9       | Natural    | Intestinal hemorrhage       | 228.7333333              | Paranoid schizophrenia; ADC         | R           |

|    |    |       |   |     |    |      |     |              |                             |             |                                             |   |
|----|----|-------|---|-----|----|------|-----|--------------|-----------------------------|-------------|---------------------------------------------|---|
| 15 | Sz | 1088  | M | W   | 49 | 21.5 | 6.5 | Accidental   | Combined drug overdose      | 153.6333333 | Undifferentiated schizophrenia; ADC; OAC    | R |
| 16 | Sz | 787   | M | B   | 27 | 19.2 | 6.7 | Suicide      | Gunshot                     | 207.9666667 | Schizoaffective disorder; ODC               | L |
| 17 | Sz | 829   | M | W   | 25 | 5    | 6.8 | Suicide      | Salicylate overdose         | 199.5666667 | Schizoaffective disorder; ADC; OAR          | U |
| 18 | Sz | 930   | M | W   | 47 | 15.3 | 6.2 | Natural      | ASCVD                       | 179.0333333 | Disorganized schizophrenia; ADR; OAR        | R |
| 19 | Sz | 722   | M | B   | 45 | 9.1  | 6.7 | Natural      | Upper GI bleed              | 219.3666667 | Undifferentiated schizophrenia; ODR; OAR    | R |
| 20 | Sz | 1105  | M | W   | 53 | 7.9  | 6.2 | Natural      | ASCVD                       | 151.7       | Schizoaffective disorder                    | R |
| 21 | Sz | 802   | F | W   | 63 | 29   | 6.4 | Natural      | Right ventricular dysplasia | 204.9       | Schizoaffective disorder; ADC; ODR          | M |
| 22 | Sz | 1010  | F | B   | 44 | 18.7 | 6.2 | Natural      | Sudden unexpected death     | 166.0666667 | Undifferentiated schizophrenia              | L |
| 23 | Sz | 1222  | M | W   | 32 | 30.8 | 6.4 | Suicide      | Combined drug overdose      | 137.9333333 | Undifferentiated schizophrenia; AAC         | R |
| 24 | Sz | 933   | M | W   | 44 | 8.3  | 5.9 | Natural      | Myocarditis                 | 178.5       | Disorganized schizophrenia                  | U |
| 25 | Sz | 625   | M | B   | 49 | 23.5 | 7.3 | Natural      | ASCVD                       | 233.2       | Disorganized schizophrenia; AAC             | R |
| 26 | Sz | 917   | F | W   | 71 | 23.8 | 6.8 | Natural      | ASCVD                       | 182.5       | Undifferentiated schizophrenia              | U |
| 27 | Sz | 537   | F | W   | 37 | 14.5 | 6.7 | Suicide      | Hanging                     | 247.8333333 | Schizoaffective disorder                    | U |
| 28 | Sz | 878   | M | W   | 33 | 10.8 | 6.7 | Natural      | Myocardial fibrosis         | 189.9       | Disorganized schizophrenia; ADC             | R |
| 29 | Sz | 621   | M | W83 | 83 | 16   | 7.3 | Accidental   | Asphyxiation                | 233.6333333 | Chronic undifferentiated schizophrenia      | U |
| 30 | Sz | 1188  | M | W   | 58 | 7.7  | 6.2 | Natural      | ASCVD                       | 142.8333333 | Undifferentiated schizophrenia; AAR; OAR    | R |
| 31 | Sz | 1649  | M | B   | 17 | 21.4 | 6.9 | Suicide      | Hanging                     | 62.6        | Undifferentiated schizophrenia              | L |
| 32 | Sz | 1230  | M | W   | 50 | 16.9 | 6.6 | Suicide      | Doxepin overdose            | 136.3666667 | Undifferentiated schizophrenia              | L |
| 33 | Sz | 1341  | F | W   | 44 | 24.5 | 6.6 | Accidental   | Trauma                      | 116.9333333 | Schizoaffective disorder; ODC               | R |
| 34 | Sz | 1420  | M | W   | 47 | 23.4 | 6.7 | Suicide      | Jumping                     | 103.1       | Schizoaffective disorder; AAR; OAR          | R |
| 35 | Sz | 1454  | M | W   | 59 | 24.1 | 6.1 | Accidental   | Trauma                      | 96.4666667  | Paranoid schizophrenia; AAR; ODC            | U |
| 36 | Sz | 1542  | M | W   | 65 | 17.4 | 6.7 | Undetermined | Combined drug overdose      | 79.3        | Paranoid schizophrenia                      | U |
| 37 | Sz | 1579  | F | W   | 69 | 16.1 | 6.7 | Natural      | ASCVD                       | 72.9        | Schizoaffective disorder; ADR; ODC          | R |
| 38 | Sz | 1581  | M | W   | 32 | 18.4 | 6.8 | Natural      | ASCVD                       | 72.5333333  | Paranoid schizophrenia; ODC; OAC            | R |
| 39 | Sz | 10026 | F | W   | 46 | 23.8 | 6.6 | Suicide      | Thermal injuries            | 132.3666667 | Undifferentiated schizophrenia              | R |
| 40 | Sz | 1686  | M | B   | 56 | 14.1 | 6.2 | Natural      | ASCVD                       | 55.3666667  | Paranoid schizophrenia; AAR                 | R |
| 41 | Sz | 1712  | M | W   | 63 | 15.1 | 6.2 | Natural      | ASCVD                       | 48.8666667  | Schizoaffective disorder; ODC, ADR          | R |
| 42 | Sz | 566   | M | W   | 63 | 18.3 | 6.8 | Natural      | ASCVD                       | 243.1666667 | Chronic undifferentiated schizophrenia; AAR | R |
| 43 | Sz | 587   | F | B   | 38 | 17.8 | 7   | Natural      | Myocardial hypertrophy      | 239.4333333 | Chronic undifferentiated schizophrenia; AAR | R |
| 44 | Sz | 640   | M | W   | 49 | 5.2  | 6.9 | Natural      | Pulmonary embolism          | 231.2333333 | Chronic paranoid schizophrenia              | U |
| 45 | Sz | 904   | M | W   | 33 | 28   | 6.2 | Natural      | Broncho-pneumonia           | 185.7333333 | Schizoaffective disorder                    | R |
| 46 | Sz | 1314  | M | W   | 50 | 11   | 6.2 | Natural      | ASCVD                       | 122.4666667 | Undifferentiated schizophrenia              | R |
| 47 | Sz | 1455  | M | W   | 42 | 8.2  | 6.2 | Natural      | Peritonitis                 | 96.4666667  | Paranoid schizophrenia; AAR                 | L |

|    |    |      |   |   |    |      |     |            |                        |    |                               |   |
|----|----|------|---|---|----|------|-----|------------|------------------------|----|-------------------------------|---|
| 48 | Sz | 1506 | F | W | 47 | 14.1 | 6.6 | Accidental | Combined drug overdose | 88 | Schizoaffective disorder; ADC | R |
|----|----|------|---|---|----|------|-----|------------|------------------------|----|-------------------------------|---|

**eTable 2. Synaptosome Enrichment**

| <b>Uniprot ID</b> | <b>Uniprot Accession</b> | <b>Average synaptosome/homogenate value for controls</b> |
|-------------------|--------------------------|----------------------------------------------------------|
| 1433E             | P62258                   | 0.48                                                     |
| 1433G             | P61981                   | 0.63                                                     |
| 1433T             | P27348                   | 0.38                                                     |
| 1433Z             | P63104                   | 0.43                                                     |
| 2A5D              | Q14738                   | 1.35                                                     |
| 2AAA              | P30153                   | 0.64                                                     |
| 2ABA              | P63151                   | 0.84                                                     |
| 3HIDH             | P31937                   | 0.59                                                     |
| 4F2               | P08195                   | 2.70                                                     |
| AAK1              | Q2M2I8                   | 1.63                                                     |
| AAKG1             | P54619                   | 0.30                                                     |
| AAKG2             | Q9UGJ0                   | 1.29                                                     |
| AATC              | P17174                   | 0.18                                                     |
| AATM              | P00505                   | 0.60                                                     |
| ABR               | Q12979                   | 1.53                                                     |
| ACLY              | P53396                   | 0.77                                                     |
| ACON              | Q99798                   | 0.82                                                     |
| ACTN4             | O43707                   | 0.69                                                     |
| ACTZ              | P61163                   | 0.62                                                     |
| ADDA              | P35611                   | 0.81                                                     |
| ADDB              | P35612                   | 0.82                                                     |
| ADHX              | P11766                   | 0.26                                                     |
| ADT1              | P12235                   | 2.32                                                     |
| ADT3              | P12236                   | 1.56                                                     |
| AINX              | Q16352                   | 0.80                                                     |
| AIP               | O00170                   | 0.24                                                     |
| AK1C1             | Q04828                   | 0.55                                                     |
| AKA12             | Q02952                   | 2.11                                                     |
| AL3A1             | P30838                   | 1.20                                                     |
| ALDH2             | P05091                   | 0.36                                                     |
| ALDOA             | P04075                   | 0.44                                                     |
| ALDOC             | P09972                   | 0.26                                                     |
| ALDR              | P15121                   | 0.23                                                     |
| ANK1              | P16157                   | 1.65                                                     |
| ANK2              | Q01484                   | 1.57                                                     |
| ANK3              | Q12955                   | 1.77                                                     |
| ANXA3             | P12429                   | 1.76                                                     |
| AOFB              | P27338                   | 2.07                                                     |
| AP180             | O60641                   | 0.73                                                     |
| AP1B1             | Q10567                   | 1.11                                                     |
| AP2A2             | O94973                   | 1.09                                                     |

|        |        |      |
|--------|--------|------|
| AP2B1  | P63010 | 1.12 |
| AP2M1  | Q96CW1 | 1.31 |
| AP3B2  | Q13367 | 1.06 |
| ARC1A  | Q92747 | 0.90 |
| ARF1   | P84077 | 0.47 |
| ARP2   | P61160 | 0.90 |
| ARP3   | P61158 | 0.67 |
| ARPC2  | O15144 | 0.82 |
| ARPC3  | O15145 | 0.90 |
| AT1A1  | P05023 | 2.32 |
| AT1A3  | P13637 | 2.22 |
| AT1B1  | P05026 | 1.98 |
| AT2B1  | P20020 | 2.31 |
| ATLA1  | Q8WXF7 | 1.66 |
| ATPA   | P25705 | 1.98 |
| ATPB   | P06576 | 1.10 |
| ATPO   | P48047 | 2.09 |
| B4DV12 | B4DV12 | 0.67 |
| B7Z1I4 | B7Z1I4 | 2.33 |
| BAIP2  | Q9UQB8 | 1.48 |
| BDH    | Q02338 | 1.44 |
| BSN    | Q9UPA5 | 1.10 |
| C1TC   | P11586 | 0.94 |
| C2C2L  | O14523 | 1.87 |
| CACB3  | P54284 | 1.91 |
| CACB4  | O00305 | 2.03 |
| CAD10  | Q9Y6N8 | 1.19 |
| CALR   | P27797 | 0.62 |
| CAND1  | Q86VP6 | 0.54 |
| CAP1   | Q01518 | 1.00 |
| CAP2   | P40123 | 1.67 |
| CAPS1  | Q9ULU8 | 0.90 |
| CAPZB  | P47756 | 0.97 |
| CBR1   | P16152 | 0.34 |
| CDC42  | P60953 | 0.52 |
| CDK5   | Q00535 | 1.31 |
| CH60   | P10809 | 1.10 |
| CISY   | O75390 | 0.75 |
| CKAP4  | Q07065 | 1.90 |
| CKAP5  | Q14008 | 1.36 |
| CLAP2  | O75122 | 1.43 |
| CLH1   | Q00610 | 0.41 |
| CMC1   | O75746 | 1.93 |
| CN37   | P09543 | 0.93 |

|        |        |      |
|--------|--------|------|
| CNDP2  | Q96KP4 | 0.23 |
| CNTN1  | Q12860 | 1.93 |
| CNTN2  | Q02246 | 1.35 |
| CNTP1  | P78357 | 1.86 |
| CO3    | P01024 | 1.99 |
| COF1   | P23528 | 0.46 |
| COPG1  | Q9Y678 | 0.98 |
| COR1A  | P31146 | 0.97 |
| COR1C  | Q9ULV4 | 1.06 |
| CPNE6  | O95741 | 1.80 |
| CPNS1  | P04632 | 1.11 |
| CPT1A  | P50416 | 1.16 |
| CTNB1  | P35222 | 1.77 |
| CUL3   | Q13618 | 0.71 |
| CXA1   | P17302 | 3.16 |
| CYFP1  | Q7L576 | 1.15 |
| DAAM2  | Q86T65 | 0.76 |
| DCE2   | Q05329 | 1.00 |
| DCLK1  | O15075 | 1.23 |
| DCTN1  | Q14203 | 0.89 |
| DHE3   | P00367 | 0.56 |
| DIRA2  | Q96HU8 | 1.65 |
| DLG2   | Q15700 | 0.81 |
| DLG4   | P78352 | 1.50 |
| DLGP2  | Q9P1A6 | 0.63 |
| DLGP4  | Q9Y2H0 | 0.70 |
| DMXL2  | Q8TDJ6 | 1.51 |
| DPYL1  | Q14194 | 0.26 |
| DPYL2  | Q16555 | 0.25 |
| DYHC1  | Q14204 | 1.18 |
| DYN1   | Q05193 | 1.48 |
| DYN2   | P50570 | 1.51 |
| E41L1  | Q9H4G0 | 1.31 |
| E41L3  | Q9Y2J2 | 1.24 |
| EAA1   | P43003 | 2.27 |
| EAA2   | P43004 | 2.78 |
| EF1A1  | P68104 | 1.51 |
| EFHD2  | Q96C19 | 0.43 |
| EGFR   | P00533 | 1.32 |
| ENOA   | P06733 | 0.13 |
| ENOG   | P09104 | 0.14 |
| EPN1   | Q9Y6I3 | 0.56 |
| F8VWT9 | F8VWT9 | 0.75 |
| FAK2   | Q14289 | 1.23 |



|       |        |      |
|-------|--------|------|
| FARP1 | Q9Y4F1 | 1.81 |
| FARP2 | O94887 | 0.56 |
| FLOT1 | O75955 | 2.16 |
| FLOT2 | Q14254 | 2.51 |
| FSCN1 | Q16658 | 0.24 |
| G3P   | P04406 | 1.11 |
| G6PI  | P06744 | 0.32 |
| GBB1  | P62873 | 1.61 |
| GBRA1 | P14867 | 2.27 |
| GBRB1 | P18505 | 2.37 |
| GBRB3 | P28472 | 2.18 |
| GBRG2 | P18507 | 2.20 |
| GCYB1 | Q02153 | 0.97 |
| GDAP1 | Q8TB36 | 2.16 |
| GDIA  | P31150 | 0.23 |
| GDS1  | P52306 | 0.63 |
| GEPH  | Q9NQX3 | 0.90 |
| GFAP  | P14136 | 0.28 |
| GHC1  | Q9H936 | 2.08 |
| GLNA  | P15104 | 0.33 |
| GLPK  | P32189 | 1.96 |
| GLSK  | O94925 | 1.10 |
| GNAI1 | P63096 | 1.63 |
| GNAO  | P09471 | 1.86 |
| GNAQ  | P50148 | 1.67 |
| GNAS2 | P63092 | 1.74 |
| GNAZ  | P19086 | 1.82 |
| GPDM  | P43304 | 1.39 |
| GPM6A | P51674 | 2.17 |
| GRIA1 | P42261 | 2.39 |
| GRIA2 | P42262 | 2.34 |
| GRIA3 | P42263 | 2.44 |
| GRM2  | Q14416 | 2.54 |
| GRM3  | Q14832 | 2.26 |
| GRM5  | P41594 | 0.74 |
| GRP75 | P38646 | 0.90 |
| GRP78 | P11021 | 0.66 |
| GSH1  | P48506 | 0.45 |
| GSTM3 | P21266 | 0.61 |
| HOME1 | Q86YM7 | 1.40 |
| HOME2 | Q9NSB8 | 0.25 |
| HPCA  | P84074 | 0.86 |
| HPCL1 | P37235 | 1.16 |
| HS12A | O43301 | 1.70 |

|       |        |      |
|-------|--------|------|
| HS71A | P0DMV8 | 0.61 |
| HS90A | P07900 | 0.53 |
| HS90B | P08238 | 0.62 |
| HSP74 | P34932 | 0.44 |
| HSP7C | P11142 | 0.46 |
| HXK1  | P19367 | 1.92 |
| IMB1  | Q14974 | 0.75 |
| IP3KA | P23677 | 1.64 |
| ITPR1 | Q14643 | 1.67 |
| KAD1  | P00568 | 0.51 |
| KAD4  | P27144 | 1.56 |
| KALRN | O60229 | 1.04 |
| KAP2  | P13861 | 1.00 |
| KAP3  | P31323 | 1.09 |
| KCC2A | Q9UQM7 | 1.34 |
| KCC2B | Q13554 | 1.38 |
| KCC2D | Q13557 | 1.25 |
| KCNA1 | Q09470 | 1.84 |
| KCRB  | P12277 | 0.63 |
| KPCA  | P17252 | 1.70 |
| KPCE  | Q02156 | 1.36 |
| KPCG  | P05129 | 1.35 |
| KPYM  | P14618 | 0.23 |
| L1CAM | P32004 | 2.03 |
| LDHA  | P00338 | 0.34 |
| M2OM  | Q02978 | 2.00 |
| MAP1A | P78559 | 1.02 |
| MAP1B | P46821 | 1.10 |
| MARE2 | Q15555 | 1.80 |
| MARK2 | Q7KZI7 | 0.83 |
| MBP   | P02686 | 0.89 |
| MDHC  | P40925 | 0.14 |
| MK01  | P28482 | 0.94 |
| MK03  | P27361 | 0.85 |
| MPCP  | Q00325 | 2.08 |
| MTAP2 | P11137 | 0.88 |
| MYPR  | P60201 | 0.66 |
| NAC1  | P32418 | 2.13 |
| NBEA  | Q8NFP9 | 1.31 |
| NCAM1 | P13591 | 2.16 |
| NCAM2 | O15394 | 1.54 |
| NCAN  | O14594 | 1.44 |
| NCDN  | Q9UBB6 | 0.62 |
| NCPR  | P16435 | 1.60 |

|        |        |      |
|--------|--------|------|
| NDUAA  | O95299 | 3.41 |
| NDUV1  | P49821 | 1.68 |
| NEGR1  | Q7Z3B1 | 2.01 |
| NFASC  | O94856 | 1.65 |
| NFH    | P12036 | 0.51 |
| NFL    | P07196 | 0.59 |
| NLGN2  | Q8NFZ4 | 1.52 |
| NMDE2  | Q13224 | 0.86 |
| NMDZ1  | Q05586 | 2.26 |
| NNTM   | Q13423 | 1.98 |
| NOS1   | P29475 | 1.26 |
| NRX1A  | Q9ULB1 | 1.85 |
| NRX3A  | Q9Y4C0 | 2.07 |
| NSF    | P46459 | 2.57 |
| NTRK2  | Q16620 | 0.53 |
| ODPB   | P11177 | 1.15 |
| OGDHL  | Q9ULD0 | 1.46 |
| OPA1   | O60313 | 1.84 |
| OTUB1  | Q96FW1 | 0.62 |
| PAK3   | O75914 | 0.51 |
| PHB2   | Q99623 | 2.18 |
| PIPNB  | P48739 | 0.85 |
| PP1A   | P62136 | 0.91 |
| PP1B   | P62140 | 0.90 |
| PP2AA  | P67775 | 0.64 |
| PP2BA  | Q08209 | 0.40 |
| PPIA   | P62937 | 0.32 |
| PRDX1  | Q06830 | 0.50 |
| PRDX2  | P32119 | 1.55 |
| PRDX5  | P30044 | 0.30 |
| PRS6A  | P17980 | 1.30 |
| PRS7   | P35998 | 0.82 |
| PSD11  | O00231 | 1.06 |
| PSD12  | O00232 | 1.02 |
| PSMD1  | Q99460 | 0.62 |
| PSMD2  | Q13200 | 1.10 |
| PSMD7  | P51665 | 0.88 |
| PTPRA  | P18433 | 1.12 |
| PTPRS  | Q13332 | 1.98 |
| PTPRZ  | P23471 | 0.84 |
| PYC    | P11498 | 1.01 |
| PYGB   | P11216 | 0.85 |
| Q6FHZ0 | Q6FHZ0 | 0.83 |
| Q6NVC0 | Q6NVC0 | 1.79 |

|        |        |      |
|--------|--------|------|
| Q6PJ43 | Q6PJ43 | 0.70 |
| QCR2   | P22695 | 1.88 |
| RAB14  | P61106 | 0.86 |
| RAB1A  | P62820 | 0.97 |
| RAB2A  | P61019 | 0.86 |
| RAB3A  | P20336 | 0.66 |
| RAC1   | P63000 | 0.92 |
| RALA   | P11233 | 1.02 |
| RAN    | P62826 | 0.36 |
| RAP1A  | Q5EBH1 | 0.90 |
| RB39A  | Q14964 | 0.87 |
| RGS7   | P49802 | 1.64 |
| RHG01  | Q07960 | 1.38 |
| RHOA   | P61586 | 0.57 |
| RHOB   | P62745 | 1.27 |
| ROA2   | P22626 | 0.37 |
| RP3A   | Q9Y2J0 | 1.63 |
| RTN1   | Q16799 | 1.64 |
| RTN4   | Q9NQC3 | 0.36 |
| RUFY3  | Q7L099 | 1.53 |
| S12A5  | Q9H2X9 | 1.58 |
| S4A4   | Q9Y6R1 | 2.60 |
| SAR1B  | Q9Y6B6 | 1.37 |
| SC6A1  | P30531 | 2.20 |
| SCOT1  | P55809 | 0.74 |
| SDHB   | P21912 | 1.70 |
| SEPT2  | Q15019 | 0.55 |
| SEPT3  | Q9UH03 | 1.28 |
| SEPT4  | O43236 | 1.32 |
| SEPT5  | Q99719 | 1.43 |
| SEPT7  | Q16181 | 0.97 |
| SEPT8  | Q92599 | 1.06 |
| SEPT9  | Q9UHD8 | 1.13 |
| SERA   | O43175 | 0.76 |
| SH3G2  | Q99962 | 0.48 |
| SHLB2  | Q9NR46 | 0.89 |
| SNAA   | P54920 | 0.88 |
| SNAB   | Q9H115 | 0.88 |
| SNP25  | P60880 | 1.41 |
| SPTA1  | P02549 | 1.99 |
| SPTB1  | P11277 | 1.28 |
| SRC    | P12931 | 1.75 |
| SRCN1  | Q9C0H9 | 1.43 |
| STIP1  | P31948 | 0.49 |

|       |        |      |
|-------|--------|------|
| STX1A | Q16623 | 2.42 |
| STX1B | P61266 | 2.25 |
| STXB1 | P61764 | 1.05 |
| SUCB1 | Q9P2R7 | 1.18 |
| SV2A  | Q7L0J3 | 1.92 |
| SYN1  | P17600 | 2.27 |
| SYN2  | Q92777 | 1.62 |
| SYNJ1 | O43426 | 0.83 |
| SYT1  | P21579 | 2.30 |
| SYT2  | Q8N9I0 | 2.20 |
| SYT7  | O43581 | 2.07 |
| TAU   | P10636 | 1.21 |
| TBA1A | Q71U36 | 1.06 |
| TBB2A | Q13885 | 0.92 |
| TBB5  | P07437 | 1.07 |
| TEBP  | Q15185 | 1.20 |
| TFR1  | P02786 | 1.67 |
| TPIS  | P60174 | 0.13 |
| UBA1  | P22314 | 0.50 |
| UBE2N | P61088 | 0.60 |
| UBP5  | P45974 | 1.37 |
| UCL1  | P09936 | 0.21 |
| VAPA  | Q9P0L0 | 1.29 |
| VAPB  | O95292 | 1.43 |
| VAT1L | Q9HCJ6 | 0.53 |
| VATA  | P38606 | 1.62 |
| VATB2 | P21281 | 1.51 |
| VATC1 | P21283 | 1.90 |
| VATD  | Q9Y5K8 | 1.68 |
| VATE1 | P36543 | 2.05 |
| VATH  | Q9UI12 | 1.59 |
| VDAC1 | P21796 | 2.05 |
| VDAC2 | P45880 | 2.11 |
| VDAC3 | Q9Y277 | 2.44 |
| VGLU1 | Q9P2U7 | 2.47 |
| VGLU2 | Q9P2U8 | 1.80 |
| VIME  | P08670 | 0.31 |
| VINC  | P18206 | 0.47 |
| VISL1 | P62760 | 0.72 |
| VP26B | Q4G0F5 | 0.77 |
| VPP1  | Q93050 | 2.40 |
| VPS35 | Q96QK1 | 0.70 |
| XPOT  | O43592 | 1.72 |

To assess the enrichment (or de-enrichment) of each protein in the synaptosome preparations, the synaptosome level of each protein was divided by its homogenate level, for each subject in the control group. This table reports the averages of those enrichment values for each protein.

**eTable 3. Mouse Homogenate PMI**

| Name   | pvalue   | qvalue   | Dropped From Human Analysis | 0     | 0     | 0     | 0     | 6     | 6     | 6     | 6     | 12    | 12    | 12    | 12    | 18    | 18    | 18    | 18    | 24    | 24    | 24    | 24    | 30    | 30    | 30    | 30    |
|--------|----------|----------|-----------------------------|-------|-------|-------|-------|-------|-------|-------|-------|-------|-------|-------|-------|-------|-------|-------|-------|-------|-------|-------|-------|-------|-------|-------|-------|
| TAU    | 1.18E-15 | 4.86E-13 |                             | 0.49  | 0.75  | 0.75  | 0.52  | 0.57  | 0.62  | 0.87  | 0.43  | 0.13  | 0.37  | 0.05  | 0.21  | 0.08  | 0.17  | 0.17  | -0.06 | -1.94 | -2.07 | -1.89 | -1.76 | -2.69 | -3.23 | -2.61 | -2.44 |
| ADDA   | 4.86E-14 | 9.98E-12 |                             | 1.32  | 1.37  | 1.24  | 1.52  | 1.19  | 1.08  | 1.42  | 1.48  | 0.77  | 0.28  | 0.78  | 0.30  | 0.44  | 0.77  | 0.92  | 0.50  | -1.95 | -1.71 | -1.77 | -1.57 | -2.70 | -3.33 | -2.19 | -2.38 |
| NOS1   | 1.01E-11 | 1.39E-09 |                             | 0.82  | 1.22  | -0.31 | 1.05  | 0.77  | -0.12 | 0.57  | 0.88  | 0.00  | -0.87 | -1.39 | -0.35 | -0.97 | 0.24  | -0.24 | 0.08  | -4.03 | -3.28 | -3.48 | -3.35 | -5.02 | -4.97 | -4.44 | -4.64 |
| MTAP2  | 4.92E-11 | 4.40E-09 |                             | 0.44  | 0.66  | 0.37  | 0.49  | 0.31  | 0.51  | 0.53  | 0.35  | 0.29  | 0.42  | 0.18  | 0.11  | -0.03 | 0.25  | 0.04  | 0.15  | -0.19 | -0.42 | -0.47 | -0.73 | -1.13 | -0.90 | -1.09 | -1.26 |
| TBB2A  | 5.35E-11 | 4.40E-09 |                             | 0.03  | 0.15  | 0.10  | 0.22  | 0.06  | 0.03  | 0.28  | 0.10  | 0.00  | 0.10  | 0.06  | -0.23 | -0.14 | 0.06  | -0.16 | -0.05 | -0.54 | -0.39 | -0.45 | -0.55 | -0.96 | -0.85 | -0.87 | -0.88 |
| CO2    | 2.26E-10 | 1.47E-08 |                             | 0.13  | 0.84  | 0.53  | 0.62  | 0.45  | 0.18  | 0.33  | -0.14 | -0.14 | -0.21 | -0.11 | -0.12 | -0.44 | 0.15  | 0.00  | -0.18 | -1.98 | -1.82 | -1.85 | -2.35 | -3.75 | -2.61 | -2.13 | -2.57 |
| PP2BA  | 2.50E-10 | 1.47E-08 |                             | 0.61  | 0.66  | 0.69  | 0.89  | 0.46  | 0.77  | 0.52  | 0.57  | 0.57  | 0.22  | 0.30  | 0.55  | 0.57  | 0.41  | 0.31  | 0.27  | -0.62 | -0.46 | -0.59 | -0.26 | -0.57 | -1.25 | -1.03 | -1.14 |
| B4DV12 | 4.95E-09 | 2.26E-07 | x                           | 1.26  | 1.55  | 1.83  | 1.75  | -1.33 | -1.22 | -0.18 | -1.23 | -1.17 | -2.23 | -2.37 | -2.02 | -1.97 | -0.80 | -2.29 | -2.03 | -2.41 | -1.81 | -3.16 | -2.99 | -2.92 | -2.79 | -2.67 | -2.22 |
| MAP1A  | 4.60E-09 | 2.26E-07 |                             | 0.04  | 0.16  | 0.18  | 0.51  | 0.26  | 0.49  | 0.62  | 0.38  | 0.26  | -0.11 | -0.31 | -0.16 | 0.01  | 0.30  | 0.03  | -0.01 | -0.86 | -0.76 | -1.10 | -0.81 | -1.56 | -1.02 | -0.88 | -1.18 |
| E41L3  | 8.71E-09 | 3.58E-07 | x                           | 0.66  | 0.67  | 0.70  | 1.24  | -0.04 | 0.39  | 0.47  | 0.67  | 0.43  | 0.80  | 0.28  | -0.01 | 0.35  | -0.07 | 1.05  | -0.47 | -1.53 | -1.32 | -1.53 | -1.64 | -2.62 | -2.92 | -1.64 | -2.07 |
| GFAP   | 2.25E-08 | 8.42E-07 | x                           | -1.11 | -1.04 | -2.03 | NA    | 0.77  | -1.01 | -0.06 | 0.24  | -0.71 | -0.06 | -0.84 | -0.39 | NA    | -1.35 | -0.02 | NA    | -4.34 | -3.45 | -3.98 | -3.34 | -5.56 | -5.28 | -4.22 | -4.62 |
| MAP1B  | 2.92E-07 | 9.22E-06 |                             | 0.35  | 0.10  | 0.16  | 0.00  | 0.17  | -0.15 | 0.32  | 0.60  | 0.11  | 0.01  | 0.00  | -0.56 | -0.16 | -0.53 | 0.44  | 0.12  | -1.23 | -1.06 | -1.45 | -0.63 | -1.79 | -1.44 | -1.64 | -1.24 |
| SRCN1  | 2.76E-07 | 9.22E-06 |                             | 0.42  | 0.73  | 1.53  | 1.01  | 0.54  | -0.80 | 0.78  | 0.84  | -0.04 | 0.38  | 0.93  | -0.04 | 0.13  | 0.27  | -1.49 | -0.21 | -2.53 | -1.72 | -2.34 | -1.63 | -2.12 | -3.22 | -2.38 | -2.62 |
| EAA2   | 6.82E-07 | 2.00E-05 |                             | 1.75  | 0.95  | 1.47  | 1.02  | 1.25  | 1.09  | 0.20  | 1.52  | 1.43  | 1.31  | 1.61  | 1.23  | 1.20  | 0.50  | 1.72  | 0.95  | 0.01  | -0.37 | -0.02 | 0.07  | -0.75 | -0.98 | -0.37 | -0.79 |
| MBP    | 2.42E-06 | 6.64E-05 |                             | 1.84  | 1.81  | 1.87  | 1.99  | 1.73  | 1.80  | 1.94  | 2.05  | 1.62  | 1.64  | 1.58  | 1.30  | 2.19  | 1.65  | 2.38  | 1.97  | 0.62  | 0.84  | 0.81  | 0.85  | -0.27 | 0.60  | 0.73  | 1.21  |
| EGFR   | 2.07E-05 | 5.31E-04 |                             | -0.07 | 0.02  | -0.14 | 0.11  | -0.34 | -0.09 | 0.11  | -0.25 | -0.22 | -0.08 | -0.30 | -0.41 | -0.11 | -0.01 | -0.26 | -0.22 | -0.70 | -0.53 | -0.65 | -0.42 | -0.77 | -0.55 | -0.73 | -0.48 |
| TBB5   | 2.64E-05 | 6.39E-04 |                             | 0.50  | 0.58  | 0.57  | -0.16 | 0.48  | 0.46  | -0.16 | 0.45  | -0.34 | 0.41  | 0.14  | 0.28  | 0.24  | -0.43 | 0.27  | 0.31  | -0.50 | -0.95 | -0.35 | -0.43 | -0.91 | -0.89 | -0.84 | -1.24 |
| EF1A1  | 6.38E-05 | 1.46E-03 |                             | -0.76 | -0.71 | -0.78 | -0.63 | -0.78 | -0.77 | -0.53 | -0.74 | -0.92 | -0.80 | -0.68 | -1.12 | -0.90 | -0.65 | -0.86 | -0.86 | -1.07 | -0.97 | -1.17 | -1.07 | -1.17 | -1.08 | -1.19 | -1.13 |
| SH3G2  | 7.88E-05 | 1.70E-03 |                             | 0.59  | 0.63  | 0.85  | 1.05  | 0.71  | 0.61  | 0.70  | 0.60  | 1.10  | 0.59  | 0.63  | 0.85  | 0.93  | 1.01  | 0.30  | 0.57  | 0.02  | 0.57  | 0.41  | 0.36  | -0.10 | -0.04 | -0.28 | 0.01  |
| NFH    | 1.95E-04 | 4.00E-03 |                             | 0.89  | 0.80  | 1.05  | 1.19  | 1.03  | 0.75  | 1.04  | 1.05  | 0.68  | 0.80  | 0.73  | 0.14  | 1.11  | 0.87  | 0.47  | 0.88  | -0.11 | 0.11  | -0.24 | -0.82 | -1.51 | -0.15 | 0.12  | 0.14  |
| BSN    | 2.16E-04 | 4.23E-03 |                             | 0.50  | 1.01  | 0.84  | 0.83  | 0.92  | 1.05  | 0.98  | 0.73  | 0.41  | 0.79  | 0.70  | 0.54  | 0.53  | 0.12  | 0.52  | 0.39  | -0.13 | 0.33  | 0.32  | -0.13 | -0.36 | 0.59  | -0.27 | -0.04 |
| GPM6A  | 5.29E-04 | 9.88E-03 |                             | 0.08  | 0.20  | 0.27  | 0.55  | 0.43  | 0.52  | 0.45  | 0.44  | 0.43  | 0.47  | 0.74  | 0.52  | 0.67  | 0.72  | 0.37  | 0.60  | 0.62  | 0.57  | 0.81  | 0.68  | 0.93  | 0.79  | 0.75  | 0.73  |
| SHAN3  | 8.84E-04 | 1.58E-02 |                             | 1.37  | 1.86  | 3.10  | 1.23  | 1.17  | 2.28  | 1.33  | 2.51  | -0.34 | 2.05  | 1.42  | -0.35 | 0.70  | 0.63  | 2.06  | -1.20 | -0.80 | -1.04 | -0.84 | -0.08 | -0.12 | -0.74 | -2.25 | -1.83 |
| TBA1A  | 1.14E-03 | 1.96E-02 |                             | -0.56 | -1.02 | -0.92 | -0.58 | -0.38 | -0.28 | -0.29 | -0.52 | -0.07 | 0.02  | -0.48 | -0.32 | 0.11  | -0.02 | -0.06 | -0.07 | -0.60 | -0.10 | -0.12 | 0.09  | -0.05 | -0.18 | -0.46 | -0.20 |
| MDHC   | 1.26E-03 | 2.07E-02 |                             | -0.38 | -0.69 | -0.30 | -0.68 | -0.47 | -0.33 | -0.65 | -0.47 | -0.84 | -0.77 | -0.63 | -0.56 | -0.46 | -0.64 | -0.35 | -0.29 | -0.24 | -0.52 | -0.21 | -0.49 | -0.15 | -0.09 | -0.10 | -0.21 |
| NFM    | 1.82E-03 | 2.87E-02 |                             | 1.46  | 1.12  | 1.47  | 1.32  | 1.49  | 1.09  | 1.85  | 1.81  | 1.63  | 0.87  | 1.26  | 1.33  | 1.54  | 0.69  | 1.65  | 1.16  | 0.57  | 0.45  | 0.06  | 0.72  | 0.53  | 0.35  | 1.01  | 1.21  |
| DCLK1  | 2.28E-03 | 3.47E-02 |                             | -0.95 | -0.41 | -0.93 | -1.38 | -1.21 | -0.81 | -0.24 | -0.51 | -0.17 | 0.26  | -0.27 | -0.57 | -0.36 | -0.64 | -0.23 | -0.45 | -0.30 | -0.19 | -0.50 | -0.49 | -1.31 | -0.95 | -1.02 | -1.27 |
| PSA1   | 2.39E-03 | 3.50E-02 |                             | -0.45 | -0.72 | -0.29 | -0.34 | -0.91 | -0.84 | -0.70 | -1.45 | -0.84 | -0.86 | -0.90 | -0.31 | -0.69 | -0.29 | -0.68 | -0.58 | -0.25 | -0.34 | -0.23 | 0.08  | -0.40 | -0.20 | -0.61 | -0.23 |
| CAPS1  | 2.48E-03 | 3.52E-02 |                             | 0.39  | -0.11 | 0.06  | 0.87  | 0.28  | 0.18  | 0.23  | -0.24 | 0.21  | 0.01  | 0.12  | 0.24  | -0.16 | 0.72  | -0.07 | -0.38 | -0.51 | -0.51 | -0.71 | -0.85 | -0.42 | -0.64 | -0.08 | -0.88 |
| ENOA   | 3.57E-03 | 4.89E-02 |                             | -0.13 | 0.07  | -0.13 | -0.09 | 0.04  | -0.13 | -0.08 | -0.10 | -0.07 | -0.05 | -0.06 | 0.04  | 0.05  | -0.15 | 0.01  | 0.03  | 0.13  | -0.01 | 0.15  | 0.14  | 0.19  | 0.18  | 0.05  | 0.09  |
| CSK11  | 4.25E-03 | 5.64E-02 |                             | 1.12  | 1.23  | 0.96  | -0.31 | 0.16  | 0.12  | 0.01  | 0.57  | 0.18  | 0.34  | -0.74 | -0.24 | -0.15 | 0.39  | -0.01 | 0.24  | -0.53 | -0.72 | -0.42 | -0.55 | 0.28  | 0.31  | 0.23  | 0.29  |
| DLDH   | 4.77E-03 | 6.12E-02 |                             | -0.89 | -1.29 | -1.01 | -1.05 | -1.32 | -0.70 | -1.57 | -1.80 | -1.83 | 0.06  | -2.02 | -1.14 | -0.62 | -0.48 | -1.56 | -1.61 | -0.09 | -0.18 | -0.30 | -0.98 | -0.10 | 0.53  | -0.06 | 0.61  |
| KCC2D  | 5.31E-03 | 6.61E-02 |                             | 0.26  | 0.43  | -0.02 | 0.63  | 0.24  | 0.64  | 0.36  | -0.01 | 0.40  | 0.27  | 0.88  | 0.18  | 0.34  | 0.39  | 0.66  | 0.55  | -0.02 | -0.10 | 0.40  | 0.07  | -0.25 | 0.04  | -0.28 | -0.77 |
| SYN1   | 6.81E-03 | 8.23E-02 |                             | 0.32  | 0.42  | 0.28  | 0.26  | 0.27  | 0.26  | 0.29  | 0.19  | 0.53  | 0.40  | 0.32  | 0.34  | 0.31  | 0.40  | 0.07  | 0.27  | 0.33  | 0.53  | 0.46  | 0.44  | 0.68  | 0.52  | 0.37  | 0.50  |
| NFL    | 7.28E-03 | 8.55E-02 |                             | 1.19  | 0.73  | 1.54  | 1.87  | 1.27  | 1.60  | 1.71  | 1.63  | 1.64  | 1.16  | 1.34  | 1.11  | 1.39  | 1.26  | 1.58  | 1.57  | 0.75  | 0.90  | 0.92  | 0.50  | 0.28  | 0.82  | 0.94  | 1.29  |
| AINX   | 9.91E-03 | 1.10E-01 |                             | 2.14  | 2.30  | 1.88  | 2.16  | 2.26  | 2.22  | 2.41  | 2.54  | 2.57  | 1.71  | 2.24  | 1.73  | 2.47  | 2.24  | 1.87  | 2.48  | 1.56  | 1.50  | 1.61  | 1.48  | 1.02  | 1.40  | 1.83  | 2.32  |
| PRDX1  | 9.70E-03 | 1.10E-01 | x                           | -0.23 | -0.38 | -0.27 | 0.00  | -0.20 | -0.25 | -0.16 | -0.46 | -0.20 | -0.33 | -0.34 | -0.35 | -0.20 | 0.09  | 0.00  | 0.03  | -0.05 | 0.19  | -0.29 | 0.06  | -0.05 | -0.07 | 0.05  | 0.15  |
| 1433E  | 1.02E-02 | 1.10E-01 |                             | -0.55 | -0.36 | -0.38 | -0.32 | -0.61 | -0.42 | -0.20 | -0.41 | -0.12 | -0.30 | -0.40 | -0.50 | -0.36 | -0.14 | -0.33 | -0.34 | -0.11 | -0.05 | -0.25 | -0.12 | 0.01  | -0.06 | -0.24 | -0.17 |
| HUWE1  | 1.09E-02 | 1.15E-01 |                             | -0.32 | -0.32 | -0.82 | -0.74 | -0.52 | -0.64 | -0.81 | -0.66 | -0.76 | -0.75 | -0.62 | -0.44 | -0.73 | -0.56 | -0.58 | -0.84 | -0.06 | -0.52 | -0.56 | -0.24 | -0.01 | 0.09  | -0.44 | -0.31 |
| DAAM2  | 1.50E-02 | 1.46E-01 |                             | -1.11 | -1.59 | -1.69 | -1.62 | -1.13 | -0.59 | -0.19 | -0.51 | -0.45 | -0.66 | -1.00 | -0.43 | -1.68 | -0.92 | -0.41 | -1.39 | -0.39 | -0.99 | -0.37 | -0.82 | -0.84 | -1.16 | -1.09 | -0.52 |
| ITPR1  | 1.43E-02 | 1.46E-01 |                             | -2.66 | -3.00 | -2.73 | -2.11 | -2.49 | -2.12 | -1.34 | -1.81 | -1.86 | -1.79 | -2.22 | -1.69 | -2.32 | -1.05 | -1.75 | -2.98 | -1.80 | -0.88 | -1.51 | -1.58 | -1.74 | -0.39 | -1.48 | -0.91 |
| PSMD1  | 1.49E-02 | 1.46E-01 |                             | 0.67  | 0.25  | 0.63  | 0.27  | -0.44 | 0.45  | -0.71 | 0.48  | 0.56  | 0.33  | 0.46  | 0.47  | -0.08 | 0.01  | 0.13  | -0.21 | 0.67  | 0.66  | 0.51  | 1.25  | 0.15  | 0.38  | -0.19 | 0.46  |

|       |          |          |   |       |       |       |       |       |       |       |       |       |       |       |       |       |       |       |       |       |       |       |       |       |       |       |       |
|-------|----------|----------|---|-------|-------|-------|-------|-------|-------|-------|-------|-------|-------|-------|-------|-------|-------|-------|-------|-------|-------|-------|-------|-------|-------|-------|-------|
| TPIS  | 1.70E-02 | 1.62E-01 | x | -0.36 | -0.64 | -0.63 | -0.73 | -0.57 | -0.50 | -0.64 | -0.49 | -0.70 | -0.58 | -0.46 | -0.48 | -0.56 | -0.82 | -0.56 | -0.45 | -0.27 | -0.55 | -0.29 | -0.35 | -0.34 | -0.25 | -0.29 | -0.44 |
| AP180 | 1.82E-02 | 1.66E-01 |   | -0.08 | -0.65 | -0.43 | -0.04 | -0.02 | -0.26 | -0.10 | -0.46 | -0.16 | -0.44 | -0.38 | -0.46 | 0.01  | 0.31  | -0.09 | -0.25 | -0.19 | 0.13  | 0.07  | 0.14  | 0.17  | -0.03 | 0.01  | 0.18  |
| EPN1  | 1.89E-02 | 1.66E-01 |   | 0.07  | 0.13  | 0.14  | 0.14  | 0.16  | -0.18 | -0.05 | -0.16 | -0.11 | 0.00  | -0.35 | -0.34 | 0.07  | -0.01 | -0.08 | -0.11 | -0.21 | -0.07 | 0.06  | -0.06 | 0.05  | 0.27  | 0.08  | -0.03 |
| KCC2A | 1.86E-02 | 1.66E-01 |   | 0.79  | 1.01  | 1.00  | 1.07  | 0.97  | 0.96  | 0.78  | 1.10  | 1.13  | 1.07  | 1.18  | 1.03  | 0.93  | 0.95  | 0.83  | 0.78  | 0.82  | 0.96  | 1.18  | 1.09  | 1.03  | 0.70  | 0.61  | 0.54  |
| MARK2 | 1.77E-02 | 1.66E-01 |   | 0.59  | -0.01 | 0.78  | 0.90  | 0.75  | 0.26  | 0.95  | -0.36 | 1.17  | -1.05 | 0.18  | -0.08 | -1.00 | -0.39 | -0.53 | -0.03 | 0.33  | 0.30  | -0.13 | 0.21  | 0.86  | 0.98  | 0.72  | 1.41  |
| GCYB1 | 2.03E-02 | 1.74E-01 |   | -0.47 | 0.30  | -0.09 | 0.49  | -0.22 | -0.18 | 0.06  | -0.33 | -0.10 | -0.25 | -0.10 | -0.34 | -0.61 | -0.37 | -0.66 | -0.43 | 0.19  | -0.21 | 0.18  | -0.25 | -0.01 | 0.12  | 0.12  | -0.11 |
| KCRB  | 2.26E-02 | 1.89E-01 |   | -0.74 | -0.58 | -0.56 | -0.71 | -0.68 | -1.59 | -0.78 | -0.41 | -0.63 | -0.64 | -0.58 | -0.30 | -0.41 | -0.72 | -0.34 | -0.64 | -0.39 | -0.55 | -0.54 | -0.42 | -0.30 | -0.18 | -0.05 | -0.20 |
| PRS8  | 2.30E-02 | 1.89E-01 |   | 0.59  | 2.23  | 0.48  | -0.17 | -0.44 | -0.29 | -0.32 | -0.08 | 0.04  | 0.05  | -0.46 | -0.73 | -0.03 | -0.57 | -0.70 | -0.52 | 0.37  | -0.04 | 0.55  | 0.01  | -0.21 | -0.47 | 0.16  | -0.15 |
| CBR1  | 2.43E-02 | 1.96E-01 |   | -0.72 | -1.19 | -1.03 | -0.81 | -0.82 | -0.77 | -0.68 | -0.91 | -0.86 | -0.59 | -0.92 | -0.84 | -0.78 | -0.61 | -0.56 | -0.67 | -0.33 | -0.24 | -0.79 | -0.67 | -0.65 | -0.75 | -0.62 | -0.68 |
| PACN1 | 2.98E-02 | 2.35E-01 |   | 0.27  | 0.36  | 0.20  | 1.02  | 0.37  | 0.56  | 0.87  | 0.42  | 0.15  | 0.22  | 0.48  | 0.61  | 0.68  | 0.62  | 0.74  | 0.66  | -0.73 | 0.00  | -0.08 | 0.52  | 0.22  | -0.29 | 0.48  | -0.50 |
| IMB1  | 3.10E-02 | 2.40E-01 |   | -0.45 | -0.66 | -0.75 | -0.19 | -0.12 | 0.11  | -0.60 | 0.01  | -0.23 | -0.24 | -0.19 | -0.12 | -0.19 | -0.04 | -0.01 | -0.40 | -0.04 | 0.12  | 0.03  | 0.30  | -0.17 | 0.65  | -0.26 | 0.15  |
| DYN3  | 3.24E-02 | 2.47E-01 |   | 3.84  | 3.34  | 4.08  | 3.24  | 4.61  | 3.67  | 3.48  | 4.10  | 1.64  | 4.24  | 4.44  | 4.99  | 4.74  | 3.49  | 4.40  | 4.30  | 5.54  | 4.79  | 3.96  | 4.03  | 2.73  | 2.87  | 2.45  | 2.32  |
| VATE1 | 3.71E-02 | 2.77E-01 | x | 0.48  | 0.64  | 0.46  | 0.78  | 0.75  | 0.65  | 0.74  | 0.80  | 0.73  | 0.79  | 0.65  | 0.57  | 0.69  | 0.81  | 0.60  | 0.63  | 0.57  | 0.86  | 0.65  | 0.68  | 0.52  | 0.53  | 0.47  | 0.48  |
| 2AAA  | 4.41E-02 | 3.07E-01 |   | -0.53 | -0.01 | -0.11 | -0.15 | -0.79 | -0.25 | -0.25 | -0.11 | -0.34 | -0.23 | -0.26 | -0.33 | -0.01 | -0.07 | -0.10 | -0.26 | -0.08 | 0.07  | -0.04 | 0.01  | -0.10 | 0.16  | -0.14 | 0.19  |
| ARPC3 | 4.22E-02 | 3.07E-01 |   | -2.12 | -1.45 | -1.15 | -1.50 | -1.35 | -2.37 | -2.08 | -2.02 | -1.06 | -1.74 | -1.29 | -0.88 | -1.00 | -1.63 | -1.81 | -1.71 | -1.25 | -2.05 | -0.98 | -0.99 | -0.94 | -0.64 | -0.81 | -1.36 |
| HPCL1 | 4.32E-02 | 3.07E-01 |   | -1.41 | -1.44 | -1.00 | -1.82 | -1.16 | -1.41 | -0.95 | -1.65 | -2.27 | -1.63 | -1.66 | -2.07 | -1.67 | -0.72 | -1.05 | -1.48 | -0.77 | -1.21 | -1.32 | -1.24 | -1.23 | -1.12 | -1.70 | -1.44 |
| UCHL1 | 4.34E-02 | 3.07E-01 |   | -0.60 | -0.66 | -1.14 | -1.18 | -1.31 | -0.53 | -1.04 | -0.95 | -1.04 | -0.55 | -1.00 | -0.78 | -0.76 | -1.17 | -0.72 | -0.61 | -0.20 | -0.54 | -0.67 | -0.71 | -0.52 | -0.04 | -0.30 | -0.65 |
| VATB2 | 4.58E-02 | 3.13E-01 |   | 0.11  | -0.02 | 0.12  | 0.13  | NA    | 0.25  | 0.23  | 0.04  | 0.08  | 0.17  | -0.08 | 0.16  | 0.15  | 0.13  | 0.05  | -0.03 | 0.29  | 0.35  | 0.15  | 0.53  | 0.23  | 0.31  | 0.07  | 0.06  |
| DMXL2 | 5.05E-02 | 3.40E-01 |   | -0.35 | -0.37 | -0.92 | 0.03  | -0.22 | -0.63 | -1.53 | -0.26 | 0.65  | 0.48  | 1.14  | -0.04 | -0.44 | -0.89 | 0.97  | 0.80  | 2.77  | 0.31  | 0.04  | -0.57 | 1.53  | 0.80  | 1.11  | 0.93  |
| SEP11 | 5.28E-02 | 3.50E-01 |   | 0.63  | 0.66  | 0.07  | 0.76  | 0.83  | 0.33  | 1.21  | 0.85  | 0.36  | 0.28  | -0.19 | -0.53 | 0.25  | 0.71  | 0.20  | 0.90  | 0.26  | 0.50  | 0.41  | 0.79  | 0.27  | 1.02  | 0.73  | 0.49  |
| CLH1  | 5.68E-02 | 3.70E-01 |   | -0.32 | -0.05 | 0.08  | -0.18 | -0.15 | -0.17 | -0.26 | -0.19 | -0.25 | -0.27 | -0.16 | -0.17 | -0.20 | -0.12 | -0.21 | -0.24 | -0.09 | -0.08 | 0.09  | -0.13 | 0.16  | 0.05  | -0.16 | -0.06 |
| AATM  | 6.17E-02 | 3.78E-01 |   | 0.22  | 0.60  | 0.33  | 0.48  | 0.32  | 0.32  | 0.74  | 0.50  | 0.48  | 0.64  | 0.43  | 0.48  | 0.50  | 0.48  | 0.40  | 0.57  | 0.53  | 0.59  | 0.49  | 0.82  | 0.75  | 0.95  | 0.57  | 0.67  |
| KAP3  | 6.26E-02 | 3.78E-01 |   | -0.82 | -0.41 | -0.60 | -0.58 | -0.62 | -0.52 | -0.43 | -0.65 | -0.62 | -0.47 | -0.64 | -0.44 | -0.43 | -0.23 | -1.03 | -0.64 | -0.18 | -0.14 | -0.18 | -0.33 | -0.34 | -0.13 | -0.44 | -0.65 |
| NEB1  | 6.05E-02 | 3.78E-01 |   | 0.04  | 1.12  | 0.31  | 0.90  | 1.40  | -0.08 | 0.80  | 0.45  | 1.63  | 0.65  | 0.81  | 0.35  | 0.62  | 1.31  | -0.42 | 0.99  | 0.72  | -0.34 | -0.93 | -0.37 | 0.09  | -0.57 | 0.05  | -0.47 |
| STXB1 | 6.09E-02 | 3.78E-01 |   | 0.45  | 0.41  | 0.40  | 0.44  | 0.59  | 0.57  | 0.42  | 0.56  | 0.64  | 0.56  | 0.50  | 0.51  | 0.61  | 0.42  | 0.66  | 0.60  | 0.53  | 0.48  | 0.52  | 0.51  | 0.56  | 0.61  | 0.52  | 0.47  |
| ZNT1  | 6.07E-02 | 3.78E-01 |   | 0.25  | 0.16  | -0.20 | 0.09  | -0.21 | 0.07  | 0.13  | -0.32 | -0.88 | -1.13 | -0.36 | 0.14  | -0.46 | -0.63 | -0.44 | -0.23 | -1.13 | -0.73 | -0.49 | -0.27 | 0.26  | -0.55 | -0.60 | -0.14 |
| UBA1  | 6.47E-02 | 3.85E-01 |   | -0.19 | -0.28 | -0.34 | -0.33 | -0.41 | 0.01  | -0.21 | -0.42 | -0.27 | -0.17 | -0.24 | -0.19 | -0.23 | 0.04  | 0.05  | -0.26 | -0.23 | -0.11 | -0.10 | -0.04 | -0.17 | -0.01 | -0.04 | 0.11  |
| VAT1L | 6.69E-02 | 3.93E-01 |   | -1.37 | -0.91 | -1.09 | -1.24 | -1.10 | -0.53 | -1.12 | -0.81 | -1.68 | -1.34 | -2.10 | -1.35 | -0.92 | -0.70 | -1.11 | -1.02 | -1.30 | -1.16 | -1.73 | -1.74 | -2.30 | -0.55 | -1.74 | -1.34 |
| HS90B | 6.91E-02 | 3.97E-01 |   | -0.99 | -0.75 | -0.88 | -0.88 | -0.67 | -0.70 | -0.22 | -0.52 | -0.35 | -0.48 | -0.80 | -0.76 | -0.72 | -0.53 | -0.75 | -0.79 | -0.67 | -0.62 | -0.80 | -0.71 | -0.65 | -0.60 | -0.77 | -0.55 |
| KCC2B | 6.96E-02 | 3.97E-01 |   | 0.02  | 0.49  | 0.27  | 0.43  | 0.61  | 0.46  | 0.29  | 0.16  | 0.52  | 0.33  | 0.43  | 0.18  | 0.17  | 0.05  | 0.16  | 0.36  | 0.20  | 0.31  | 0.16  | 0.21  | 0.03  | 0.23  | 0.10  | -0.17 |
| ACOC  | 7.18E-02 | 4.04E-01 |   | -1.01 | -1.85 | -2.59 | -0.95 | -0.17 | -1.42 | -1.48 | -0.97 | 0.36  | -0.96 | -0.73 | -0.22 | -1.16 | -0.59 | -1.26 | -1.25 | -0.98 | -0.21 | -1.02 | -0.76 | -1.49 | -0.77 | -1.21 | -1.46 |
| ACON  | 7.67E-02 | 4.13E-01 |   | -0.37 | -0.17 | -0.43 | -0.31 | -0.38 | -0.38 | -0.20 | -0.57 | -0.09 | -0.41 | -0.36 | -0.30 | -0.27 | -0.10 | -0.34 | -0.36 | 0.02  | 0.01  | -0.22 | -0.44 | -0.15 | 0.08  | -0.16 | -0.06 |
| CAPZB | 7.67E-02 | 4.13E-01 |   | -1.50 | -1.74 | -1.77 | -1.53 | -1.57 | -1.82 | -0.95 | -1.16 | -1.52 | -1.65 | -1.71 | -1.42 | -1.96 | -1.18 | -1.06 | -1.77 | -1.64 | -1.39 | -1.51 | -1.64 | -1.35 | -1.07 | -1.05 | -0.62 |
| FSCN1 | 7.59E-02 | 4.13E-01 |   | -0.58 | -0.14 | -0.32 | -0.11 | -0.32 | -1.03 | -0.45 | -0.18 | -0.95 | -0.31 | -0.09 | -0.15 | -0.21 | -0.56 | -0.23 | -0.52 | -0.01 | -0.10 | 0.14  | -0.13 | 0.10  | -0.09 | 0.11  | -0.12 |
| SYNJ1 | 7.74E-02 | 4.13E-01 |   | 0.41  | -0.17 | 0.16  | 0.60  | 0.04  | -0.02 | -0.09 | 0.42  | 0.66  | 0.70  | 0.36  | 0.58  | 0.50  | 0.61  | 0.67  | 0.26  | 0.34  | 0.45  | 0.62  | 0.49  | 0.60  | 0.29  | -0.32 | 0.27  |
| DGKA  | 8.49E-02 | 4.47E-01 |   | 0.32  | 0.16  | -0.34 | -0.15 | 0.22  | 0.19  | -0.14 | -0.14 | 0.10  | 0.16  | 0.24  | 0.37  | 0.24  | 0.16  | 0.09  | -0.02 | 0.24  | 0.52  | 0.66  | 0.15  | 0.16  | 0.31  | 0.29  | 0.16  |
| SEPT7 | 8.63E-02 | 4.48E-01 |   | 0.65  | 0.26  | 0.25  | 0.28  | 0.37  | 0.06  | -0.08 | 0.41  | 0.31  | -0.03 | 0.17  | 0.07  | 0.21  | 0.00  | -0.03 | 0.32  | 0.18  | 0.07  | 0.38  | 0.43  | 0.53  | 0.68  | 0.36  | 0.33  |
| GNAO  | 8.82E-02 | 4.48E-01 |   | 0.55  | 0.61  | 0.64  | 0.72  | 0.10  | 0.45  | 0.41  | 0.45  | 0.76  | 0.52  | 0.72  | 0.45  | 0.56  | 0.72  | 0.50  | 0.35  | 0.51  | 0.61  | 0.61  | 0.58  | 0.61  | 0.51  | 0.20  | 0.54  |
| PHB2  | 8.79E-02 | 4.48E-01 |   | -0.52 | -0.26 | -0.53 | -0.48 | -0.55 | -0.73 | -0.57 | -0.70 | -0.22 | -0.21 | -0.40 | -0.69 | -0.28 | -0.35 | -0.09 | -0.29 | -0.41 | -0.08 | -0.63 | -0.57 | -0.53 | -0.07 | -0.43 | -0.16 |
| MK01  | 9.22E-02 | 4.62E-01 |   | 0.05  | -0.20 | -0.43 | -0.12 | 0.30  | -0.14 | -0.26 | -0.25 | -0.79 | -0.83 | -0.18 | -0.16 | -0.49 | -0.18 | -0.25 | -0.27 | 0.01  | 0.37  | -0.14 | -0.07 | -0.17 | -0.03 | -0.55 | -0.47 |
| DLG4  | 9.36E-02 | 4.64E-01 |   | 0.76  | 0.34  | 1.20  | 0.74  | 0.27  | 0.65  | 0.04  | 0.66  | 0.92  | 1.07  | 0.10  | 1.44  | 1.25  | 0.38  | -0.07 | -0.19 | -0.29 | 0.03  | 0.54  | 0.43  | 0.21  | -0.63 | 0.15  | 0.16  |
| 1433T | 9.68E-02 | 4.64E-01 |   | -0.62 | -0.54 | -0.70 | -1.01 | -0.79 | -0.71 | -1.00 | -0.66 | -0.98 | -0.52 | -0.56 | -0.58 | -0.55 | -1.06 | -0.57 | -0.56 | -0.23 | -0.74 | -0.29 | -0.43 | -0.28 | -0.38 | -0.24 | -0.73 |
| GBRA1 | 9.69E-02 | 4.64E-01 |   | 0.65  | -0.22 | 1.06  | -0.51 | -0.05 | 0.51  | -0.98 | -2.14 | -1.24 | -0.41 | 0.97  | -0.16 | -2.95 | 0.21  | -0.20 | -2.59 | -1.91 | -3.28 | -1.01 | -0.96 | -1.93 | -0.66 | -2.02 | -1.28 |
| HSP7C | 9.71E-02 | 4.64E-01 |   | -0.67 | -0.48 | -0.47 | -0.28 | -0.27 | -0.34 | -0.10 | -0.55 | -0.20 | -0.23 | -0.44 | -0.42 | -0.48 | -0.48 | -0.41 | -0.34 | -0.14 | -0.22 | -0.37 | -0.26 | -0.35 | -0.22 | -0.26 | -0.20 |



|        |          |          |  |       |       |       |       |       |       |       |       |       |       |       |       |       |       |       |       |       |       |       |       |       |       |       |       |
|--------|----------|----------|--|-------|-------|-------|-------|-------|-------|-------|-------|-------|-------|-------|-------|-------|-------|-------|-------|-------|-------|-------|-------|-------|-------|-------|-------|
| DHE3   | 9.94E-02 | 4.64E-01 |  | 0.17  | 0.02  | -0.11 | -0.14 | 0.11  | -0.12 | -0.28 | -0.03 | -0.37 | -0.13 | -0.40 | -0.20 | -0.04 | -0.45 | 0.24  | 0.01  | 0.21  | -0.11 | -0.13 | -0.01 | -0.03 | 0.09  | 0.16  | 0.31  |
| GSH1   | 9.90E-02 | 4.64E-01 |  | -0.21 | -0.68 | -0.70 | -2.75 | -0.41 | -0.61 | -1.32 | -1.37 | -0.03 | -0.80 | -0.71 | -0.14 | 0.68  | -0.40 | -0.64 | -0.08 | 0.02  | -0.76 | -0.47 | 0.79  | -0.10 | 0.64  | -0.54 | 1.17  |
| GNAS2  | 1.03E-01 | 4.64E-01 |  | -0.15 | -0.59 | 0.08  | 0.18  | -1.27 | -1.26 | -0.21 | -0.15 | -0.62 | -1.02 | -0.55 | -0.62 | -0.73 | -0.26 | 0.51  | -0.73 | -0.42 | -0.51 | -0.58 | 0.23  | 0.15  | 0.10  | -0.14 | 0.10  |
| HPCA   | 1.02E-01 | 4.64E-01 |  | 0.71  | 0.36  | 0.25  | 0.94  | 0.58  | 0.28  | 0.10  | 0.71  | 0.75  | 0.46  | 0.67  | 0.68  | 0.57  | 0.64  | 0.19  | 0.16  | 0.31  | 0.56  | 0.46  | 0.97  | 0.77  | 0.71  | 1.11  | 1.02  |
| NEGR1  | 1.02E-01 | 4.64E-01 |  | -0.37 | -0.61 | -0.55 | 0.09  | -0.51 | -0.53 | -0.96 | -0.99 | -0.34 | -0.52 | -0.82 | -0.93 | -0.27 | -0.26 | -0.56 | -0.53 | -0.15 | -0.52 | -0.13 | 0.70  | 0.02  | -0.26 | 0.33  | -0.89 |
| GUAD   | 1.05E-01 | 4.67E-01 |  | 0.06  | 0.26  | -0.10 | 0.06  | -0.18 | 0.14  | -0.03 | -0.12 | 0.25  | 0.14  | 0.11  | -0.01 | -0.17 | 0.18  | 0.14  | 0.11  | 0.19  | 0.47  | 0.23  | 0.41  | 0.29  | 0.23  | -0.22 | -0.29 |
| SNAB   | 1.06E-01 | 4.68E-01 |  | 0.79  | 0.48  | 0.50  | 0.02  | 0.60  | -0.02 | 0.39  | -0.21 | -0.38 | -0.22 | 0.33  | 0.53  | -0.03 | -0.33 | -0.63 | -0.11 | 0.50  | 0.32  | 0.36  | -0.19 | 0.42  | 0.66  | 0.02  | 0.06  |
| SCOT1  | 1.10E-01 | 4.81E-01 |  | -0.54 | -0.71 | -0.94 | -1.18 | -1.22 | -0.48 | -1.55 | -1.23 | -1.39 | -0.86 | -0.54 | -0.65 | -1.04 | -0.92 | -0.92 | -0.87 | -0.34 | -0.84 | -0.62 | -0.78 | -0.38 | -0.49 | -0.53 | -0.71 |
| ERC2   | 1.13E-01 | 4.84E-01 |  | -0.82 | -2.20 | -1.47 | -2.66 | -0.41 | -1.67 | -4.39 | -2.29 | -2.65 | -2.23 | -1.08 | -1.95 | -2.72 | -2.97 | -2.94 | 0.60  | 0.63  | -1.49 | 0.14  | -0.27 | -0.40 | -0.72 | 0.93  | -1.42 |
| GBRB3  | 1.13E-01 | 4.84E-01 |  | 0.81  | -0.97 | 0.53  | 0.61  | -0.99 | 0.02  | 0.10  | -1.14 | 1.34  | 0.61  | 0.29  | 0.37  | -0.90 | 0.34  | 0.68  | 0.18  | -0.23 | -0.33 | 1.13  | 0.19  | 0.05  | 1.52  | 1.06  | 0.84  |
| CH60   | 1.15E-01 | 4.87E-01 |  | -0.24 | -0.43 | -0.25 | -0.22 | -0.13 | -0.22 | 0.23  | -0.07 | -0.11 | 0.02  | -0.33 | -0.32 | -0.30 | -0.17 | -0.25 | -0.25 | -0.05 | -0.02 | -0.16 | -0.20 | -0.10 | 0.00  | -0.25 | 0.09  |
| VDAC2  | 1.19E-01 | 4.98E-01 |  | -0.22 | 0.00  | -0.18 | -0.01 | -0.30 | -0.18 | -0.05 | -0.23 | -0.04 | 0.03  | -0.16 | -0.23 | -0.21 | 0.02  | -0.22 | -0.09 | -0.02 | 0.18  | -0.01 | -0.10 | -0.01 | 0.07  | -0.11 | 0.08  |
| PYGB   | 1.20E-01 | 4.98E-01 |  | -0.63 | -0.74 | -0.82 | -0.59 | -0.79 | -0.79 | -0.25 | -0.87 | -0.61 | -0.74 | -0.57 | -0.67 | -0.51 | -0.14 | 0.04  | -0.81 | -0.27 | -0.35 | -0.80 | -0.33 | -0.47 | -0.36 | -0.33 | -0.23 |
| CYFP1  | 1.22E-01 | 4.99E-01 |  | 0.11  | 0.38  | -0.20 | 0.28  | -0.03 | -0.11 | 0.28  | 0.11  | 0.19  | 0.11  | -0.10 | 0.22  | -0.04 | 0.06  | 0.14  | -0.15 | 0.18  | 0.21  | 0.60  | 0.29  | 0.35  | 0.19  | 0.17  | 0.37  |
| DCTN2  | 1.25E-01 | 5.09E-01 |  | -0.68 | -0.27 | 0.14  | -0.65 | -1.02 | -1.05 | -0.31 | -0.57 | -0.20 | -0.16 | -0.17 | -0.86 | -0.72 | 0.34  | -0.19 | 0.19  | -0.21 | -0.13 | -0.14 | 0.06  | -0.62 | -0.60 | -0.46 | -0.11 |
| CISY   | 1.26E-01 | 5.10E-01 |  | -0.24 | -0.21 | -0.37 | -0.47 | -0.23 | -0.38 | -0.21 | -0.15 | -0.52 | -0.24 | -0.13 | -0.21 | -0.11 | -0.33 | -0.09 | -0.41 | 0.02  | -0.26 | -0.32 | 0.03  | -0.03 | 0.04  | -0.11 | -0.13 |
| COPG1  | 1.29E-01 | 5.13E-01 |  | -0.83 | -0.85 | -0.50 | -0.84 | -0.81 | -0.79 | -0.38 | -0.77 | -0.63 | -0.57 | -0.68 | -0.19 | -0.49 | -0.17 | -1.02 | -0.56 | -0.49 | -0.27 | -0.69 | -0.26 | -0.41 | -0.18 | -0.47 | -0.25 |
| LDHA   | 1.31E-01 | 5.13E-01 |  | -0.40 | -0.19 | -0.34 | -0.27 | -0.32 | -0.21 | -0.06 | -0.13 | -0.02 | -0.12 | -0.30 | -0.13 | -0.31 | -0.17 | -0.14 | -0.32 | -0.12 | -0.14 | -0.16 | -0.11 | -0.17 | -0.17 | -0.29 | -0.29 |
| RAB2A  | 1.32E-01 | 5.13E-01 |  | -0.96 | -0.72 | -0.90 | -0.79 | -0.74 | -0.80 | -0.72 | -0.97 | -0.85 | -0.77 | -0.95 | -0.95 | -0.98 | -0.51 | -0.81 | -0.82 | -0.54 | -0.69 | -0.75 | -0.52 | -0.84 | -0.53 | -0.65 | -0.81 |
| STX1B  | 1.32E-01 | 5.13E-01 |  | 0.52  | 0.76  | 0.68  | 0.67  | 0.87  | 0.64  | 0.99  | 0.84  | 0.74  | 0.89  | 0.40  | 0.64  | 0.73  | 0.76  | 0.78  | 0.46  | 0.52  | 0.72  | 0.32  | 0.71  | 0.46  | 0.61  | 0.44  | 0.58  |
| VINC   | 1.34E-01 | 5.13E-01 |  | -1.02 | -0.25 | -0.33 | 0.02  | 1.21  | 0.52  | -0.04 | 0.01  | -0.25 | 0.80  | 0.33  | -0.15 | -0.41 | -0.93 | 0.05  | 0.19  | -0.14 | -0.07 | -0.38 | -0.03 | -0.78 | -0.78 | -0.28 | 0.37  |
| 2ABA   | 1.35E-01 | 5.14E-01 |  | 0.49  | 0.19  | 0.41  | 0.12  | 0.60  | 0.63  | 0.32  | 0.62  | 0.08  | 0.73  | 0.11  | 0.83  | 0.61  | 1.05  | 0.55  | 1.03  | 0.62  | 0.22  | 1.54  | 0.90  | -0.01 | 0.21  | 0.72  | 0.24  |
| S4A4   | 1.37E-01 | 5.15E-01 |  | -1.20 | -1.65 | -1.49 | -1.30 | -1.56 | -1.68 | -0.89 | -1.86 | -1.62 | -1.60 | -1.92 | -1.72 | -1.57 | -1.33 | -1.32 | -1.49 | -1.20 | -0.98 | -1.84 | -1.63 | -1.32 | -0.98 | -1.28 | -0.87 |
| G3P    | 1.40E-01 | 5.18E-01 |  | -0.69 | -0.74 | -0.40 | -0.20 | -0.55 | -0.02 | -0.28 | -0.48 | -0.97 | -1.55 | -0.53 | -0.10 | -0.77 | 0.01  | -0.30 | -0.34 | -0.33 | -0.12 | -0.02 | -0.59 | -0.09 | -0.18 | -0.14 | -0.05 |
| GRIA3  | 1.40E-01 | 5.18E-01 |  | 1.85  | 1.66  | 1.04  | 1.15  | 1.01  | 0.66  | 1.35  | 0.78  | 1.55  | 1.04  | 2.24  | 1.57  | 1.33  | 1.13  | 1.83  | 1.44  | 1.11  | 1.43  | 1.60  | 1.13  | 1.62  | 0.68  | 0.75  | 1.02  |
| OTUB1  | 1.41E-01 | 5.18E-01 |  | 0.37  | 0.33  | -0.18 | -0.34 | 0.22  | 0.18  | -1.15 | 0.19  | -1.05 | 0.92  | 0.11  | -0.11 | -0.53 | -0.80 | -1.19 | -0.62 | -0.05 | -0.22 | -0.01 | -0.33 | 0.36  | 0.01  | -0.14 | 0.61  |
| AAKG1  | 1.48E-01 | 5.33E-01 |  | -0.42 | -0.11 | -0.30 | -0.09 | -0.37 | -0.50 | -0.16 | -0.70 | -0.27 | -0.41 | -0.36 | -0.58 | -0.38 | 0.00  | -0.30 | -0.25 | -0.13 | 0.26  | -0.35 | -0.22 | -0.26 | -0.24 | -0.28 | 0.00  |
| ALDOC  | 1.50E-01 | 5.33E-01 |  | -0.44 | -0.42 | -0.67 | -0.57 | -0.52 | -0.52 | -0.05 | -0.44 | -0.41 | -0.63 | -0.64 | -0.52 | -0.52 | -0.34 | -0.47 | -0.41 | -0.19 | -0.35 | -0.61 | -0.57 | -0.30 | -0.28 | -0.29 | -0.27 |
| ARC1A  | 1.50E-01 | 5.33E-01 |  | -0.94 | -0.99 | -0.72 | -0.92 | -0.90 | -0.69 | -1.35 | -0.92 | -0.65 | -0.99 | -0.71 | -0.55 | -0.45 | -1.13 | -0.86 | -0.94 | -0.56 | -1.28 | -0.60 | -0.66 | -0.45 | 0.22  | -0.34 | -0.94 |
| RAB14  | 1.49E-01 | 5.33E-01 |  | -0.74 | -0.56 | -0.21 | -0.93 | -0.64 | -0.54 | -0.65 | -0.69 | -0.61 | -0.75 | -0.76 | -0.35 | -0.83 | -0.59 | -1.22 | -0.38 | -0.41 | -0.17 | -0.33 | -0.51 | -0.24 | -0.42 | -0.35 | -0.57 |
| NMDE1  | 1.57E-01 | 5.47E-01 |  | 1.08  | 1.80  | 1.29  | 1.17  | 1.17  | 1.47  | 0.76  | 1.43  | 1.30  | 1.24  | 1.57  | 1.56  | 1.50  | 1.17  | 1.71  | 1.88  | 1.48  | 1.07  | 1.52  | 1.69  | 1.30  | 0.89  | 1.03  | 0.99  |
| ODPB   | 1.57E-01 | 5.47E-01 |  | 0.20  | 0.26  | 0.23  | 0.48  | 0.16  | 0.29  | 0.34  | 0.24  | 0.27  | 0.09  | 0.11  | 0.14  | 0.17  | 0.40  | 0.03  | 0.11  | 0.20  | 0.54  | 0.27  | 0.33  | 0.25  | 0.33  | 0.32  | 0.47  |
| 2A5D   | 1.68E-01 | 5.51E-01 |  | -0.14 | -0.35 | -0.18 | 0.16  | -0.31 | -0.43 | -0.55 | -0.47 | 0.07  | -0.15 | 0.19  | -0.02 | 0.13  | -0.14 | 0.11  | -0.68 | 0.15  | -0.39 | -0.10 | 0.16  | -0.40 | -0.16 | 0.13  | 0.07  |
| AL3A1  | 1.64E-01 | 5.51E-01 |  | 0.75  | 0.76  | 0.39  | 0.33  | -0.72 | 0.43  | 1.24  | 0.95  | 0.68  | 1.32  | 1.64  | 1.07  | -0.39 | -0.03 | 0.47  | 1.21  | 0.88  | 1.32  | 0.99  | 1.04  | 1.33  | 1.19  | 0.95  | 0.36  |
| DLGP4  | 1.65E-01 | 5.51E-01 |  | 0.13  | 0.26  | 0.15  | 0.18  | 0.38  | 0.28  | 0.30  | 0.28  | 0.32  | 0.33  | 0.15  | 0.06  | 0.28  | 0.38  | 0.32  | -0.01 | 0.38  | 0.20  | 0.27  | 0.21  | 0.21  | 0.53  | 0.35  | 0.47  |
| FAS    | 1.63E-01 | 5.51E-01 |  | 0.60  | 0.19  | -0.23 | -0.03 | -0.28 | -0.49 | -0.17 | 0.32  | 0.08  | 0.76  | -0.62 | 0.27  | 0.72  | 1.16  | 0.39  | 0.38  | -0.29 | -0.11 | 0.37  | -0.12 | -0.65 | 0.29  | 0.12  | 0.55  |
| GBRG2  | 1.68E-01 | 5.51E-01 |  | -0.22 | -2.56 | -0.04 | -0.12 | -2.16 | -0.50 | 0.48  | -0.09 | -0.96 | -0.59 | NA    | -1.90 | -1.73 | -1.26 | -1.61 | -1.26 | -0.36 | -2.31 | -1.52 | -0.93 | 0.11  | 0.88  | -0.89 | 0.56  |
| NCHL1  | 1.66E-01 | 5.51E-01 |  | -0.05 | -0.47 | -0.04 | 0.03  | -0.68 | -0.50 | -0.24 | 0.02  | 0.05  | -0.27 | -0.97 | -0.25 | -0.22 | -0.20 | -0.04 | 0.42  | -0.03 | 0.15  | 0.06  | 0.44  | -0.43 | 0.32  | -0.08 | 0.23  |
| PRDX5  | 1.60E-01 | 5.51E-01 |  | -0.26 | -0.36 | -0.36 | -0.18 | -0.38 | -0.31 | 0.08  | -0.37 | -0.07 | -0.38 | -0.41 | -0.34 | -0.25 | -0.06 | -0.29 | -0.28 | -0.11 | 0.05  | -0.37 | -0.23 | -0.10 | -0.05 | -0.01 | 0.03  |
| RAN    | 1.69E-01 | 5.51E-01 |  | -0.69 | -0.77 | -0.71 | -0.57 | -0.63 | -0.45 | -0.50 | -0.80 | -0.55 | -0.57 | -0.90 | -0.51 | -0.97 | -0.39 | -0.64 | -0.73 | -0.46 | -0.10 | -0.59 | -0.63 | -0.50 | -0.30 | -0.51 | -0.33 |
| MARE2  | 1.73E-01 | 5.55E-01 |  | 0.01  | 0.04  | 0.02  | 0.09  | -0.12 | -0.05 | 0.12  | 0.10  | 0.05  | -0.09 | -0.04 | -0.09 | 0.09  | 0.23  | 0.10  | -0.04 | 0.03  | 0.11  | 0.12  | 0.09  | 0.07  | 0.31  | 0.11  | -0.01 |
| Q6NVC0 | 1.73E-01 | 5.55E-01 |  | 0.34  | -0.10 | 0.50  | 0.03  | 0.18  | -0.27 | 0.46  | -0.14 | 0.22  | 0.24  | 0.21  | 0.18  | 0.27  | 0.65  | 0.45  | 0.41  | 0.23  | 0.62  | 0.17  | 0.31  | 0.24  | 0.28  | 0.71  | 0.40  |
| DPYL1  | 1.76E-01 | 5.62E-01 |  | 0.33  | 0.25  | 0.24  | 0.38  | 0.29  | 0.39  | 0.35  | 0.13  | 0.43  | 0.21  | 0.22  | 0.29  | 0.28  | 0.35  | 0.31  | 0.15  | 0.41  | 0.42  | 0.38  | 0.35  | 0.40  | 0.34  | 0.33  | 0.56  |
| AAK1   | 1.92E-01 | 6.00E-01 |  | -1.03 | -0.55 | -0.58 | -0.49 | -1.16 | -1.06 | -0.39 | -0.80 | -0.04 | -0.41 | -1.25 | -1.18 | -0.43 | -0.45 | -0.75 | -1.00 | -0.69 | -0.79 | -0.60 | -1.28 | -0.35 | -0.27 | -0.31 | -0.04 |

|        |          |          |  |       |       |       |       |       |       |       |       |       |       |       |       |       |       |       |       |       |       |       |       |       |       |       |       |
|--------|----------|----------|--|-------|-------|-------|-------|-------|-------|-------|-------|-------|-------|-------|-------|-------|-------|-------|-------|-------|-------|-------|-------|-------|-------|-------|-------|
| ACTZ   | 1.95E-01 | 6.00E-01 |  | -0.73 | -0.47 | -0.65 | -0.47 | -0.57 | -0.66 | -0.26 | -0.48 | -0.15 | -0.75 | -0.54 | -0.48 | -0.49 | -0.13 | -0.52 | -0.47 | -0.41 | -0.12 | -0.35 | -0.46 | -0.39 | -0.28 | -0.20 | -0.28 |
| CAD10  | 1.94E-01 | 6.00E-01 |  | 0.00  | 0.05  | 0.01  | 0.04  | 0.55  | 0.69  | 0.05  | 0.29  | 0.61  | 0.01  | 0.08  | 0.44  | -0.20 | 0.69  | 0.03  | 0.14  | 0.30  | 0.79  | 0.25  | 0.87  | 0.30  | -0.06 | 0.55  | -0.19 |
| F8VWT9 | 1.95E-01 | 6.00E-01 |  | -0.74 | -0.25 | -0.82 | -0.19 | -0.58 | -0.64 | -0.36 | -0.75 | -1.13 | -0.57 | -0.56 | -0.28 | 0.13  | -0.55 | -0.55 | -0.38 | -0.50 | -0.46 | -0.47 | -0.38 | -0.11 | -0.16 | -0.41 | -0.09 |
| Q6PJ43 | 1.91E-01 | 6.00E-01 |  | -0.28 | -0.05 | -0.29 | 0.03  | -0.50 | 0.50  | -0.13 | -0.30 | -0.38 | -0.86 | -0.29 | -0.57 | -0.17 | 0.13  | -0.25 | -0.12 | -0.16 | 0.09  | -0.74 | -0.48 | -0.13 | -0.07 | -0.20 | 0.19  |
| NMDZ1  | 1.97E-01 | 6.01E-01 |  | -1.27 | -0.84 | -0.16 | -0.68 | -0.10 | -0.78 | -0.47 | -1.25 | 0.62  | -1.06 | -1.10 | -0.09 | 0.02  | -2.49 | -0.63 | -0.34 | 1.29  | 1.97  | 0.02  | -1.39 | 0.06  | 0.11  | 0.93  | 0.22  |
| ARF1   | 2.08E-01 | 6.10E-01 |  | 0.21  | 0.31  | 0.15  | 0.41  | 0.35  | 0.11  | 0.31  | 0.33  | 0.36  | 0.36  | 0.34  | 0.31  | 0.22  | 0.43  | 0.16  | 0.29  | 0.29  | 0.50  | 0.41  | 0.48  | 0.47  | 0.47  | 0.27  | 0.29  |
| GRIA4  | 2.05E-01 | 6.10E-01 |  | 0.04  | 0.29  | 1.12  | -0.09 | -0.30 | 0.51  | 1.10  | -0.23 | 0.04  | 0.44  | -0.43 | 0.05  | 0.38  | 0.33  | 2.16  | 0.47  | 0.13  | -0.13 | 0.78  | 1.24  | 0.84  | 1.28  | 1.14  | 0.87  |
| HOME1  | 2.06E-01 | 6.10E-01 |  | 0.63  | 0.60  | 0.88  | 1.36  | 0.71  | 0.58  | 0.08  | -0.17 | 0.48  | 0.41  | 0.89  | 0.84  | 0.37  | 0.60  | 0.18  | 0.75  | 2.75  | 0.46  | 0.11  | -0.40 | -0.03 | -0.17 | -0.47 | -0.35 |
| Q6FHZ0 | 2.08E-01 | 6.10E-01 |  | -0.11 | -0.11 | -0.11 | -0.31 | -0.08 | -0.02 | -0.28 | -0.06 | -0.21 | -0.05 | -0.15 | 0.04  | 0.04  | -0.22 | 0.06  | -0.08 | 0.11  | -0.27 | -0.04 | 0.10  | 0.15  | 0.13  | 0.07  | -0.07 |
| VAPA   | 2.03E-01 | 6.10E-01 |  | 0.26  | -0.24 | -0.51 | -0.16 | -0.32 | 0.04  | -0.31 | -0.11 | -0.06 | -0.15 | -0.58 | 0.01  | -0.48 | 0.17  | -0.80 | -0.12 | -0.61 | -0.20 | 0.17  | -0.80 | -0.87 | -0.34 | -0.58 | -1.14 |
| SNPH   | 2.12E-01 | 6.17E-01 |  | -0.41 | -0.34 | -1.68 | -0.23 | 0.12  | -0.07 | -1.14 | -0.95 | -3.14 | 0.12  | -0.95 | 0.41  | -0.32 | -1.65 | -0.86 | -0.88 | -1.51 | -0.86 | -0.24 | -0.94 | -1.55 | -2.59 | -1.75 | -2.18 |
| CAND1  | 2.16E-01 | 6.18E-01 |  | -0.13 | -0.12 | -0.39 | -0.40 | 0.42  | -0.35 | 0.20  | -0.44 | 0.00  | -0.22 | -0.02 | -0.15 | -0.79 | -0.03 | -1.00 | -0.12 | -0.10 | -0.41 | 0.69  | 0.52  | -0.12 | 0.36  | -0.27 | -0.05 |
| DPYL2  | 2.16E-01 | 6.18E-01 |  | 0.21  | 0.46  | 0.54  | 0.10  | 0.68  | 0.19  | 0.50  | 0.49  | 0.46  | 0.74  | 0.55  | 0.67  | 0.70  | 0.16  | 0.54  | 0.49  | 0.64  | 0.64  | 0.36  | 0.75  | 0.63  | 0.66  | 0.51  | 0.58  |
| STX1A  | 2.15E-01 | 6.18E-01 |  | 1.28  | 0.85  | 0.92  | 1.52  | 0.98  | 1.10  | 0.97  | 0.92  | 1.52  | 1.10  | 1.39  | 1.45  | 1.54  | 1.33  | 0.99  | 1.25  | 0.73  | 1.06  | 1.30  | 1.01  | 1.30  | 1.18  | 1.18  | 0.67  |
| AP2A2  | 2.27E-01 | 6.29E-01 |  | -0.12 | 0.92  | 0.66  | -0.23 | 0.53  | 0.73  | -1.40 | -0.92 | -0.48 | 0.53  | 0.27  | 0.32  | -0.26 | -0.87 | 0.19  | 0.21  | 0.42  | 0.50  | 0.52  | 0.22  | 1.44  | 0.66  | 1.02  | -0.06 |
| DYHC1  | 2.28E-01 | 6.29E-01 |  | -0.34 | -0.21 | -0.63 | -0.13 | -0.18 | -0.54 | 0.20  | -0.13 | -0.05 | -0.03 | -0.56 | -0.18 | -0.57 | 0.15  | 0.13  | -0.08 | 0.46  | 0.47  | -0.25 | 0.09  | 0.17  | 0.04  | -0.37 | -0.04 |
| GNA13  | 2.28E-01 | 6.29E-01 |  | -0.04 | -0.30 | -0.22 | -1.10 | 0.50  | -0.69 | -0.05 | -0.24 | 0.95  | -0.69 | 1.06  | 1.37  | 0.38  | 0.98  | 0.32  | 0.08  | 0.63  | -0.03 | 0.09  | -1.17 | 0.38  | -0.57 | -0.01 | 1.16  |
| MPCP   | 2.28E-01 | 6.29E-01 |  | 0.33  | 0.23  | 0.35  | 0.07  | 0.12  | 0.32  | 0.36  | 0.41  | -0.11 | 0.18  | 0.15  | 0.34  | 0.23  | 0.42  | 0.21  | 0.34  | 0.43  | 0.25  | 0.21  | 0.37  | 0.48  | 0.50  | 0.19  | 0.38  |
| NCPR   | 2.28E-01 | 6.29E-01 |  | 0.33  | -0.62 | -0.60 | 0.29  | 0.09  | -0.90 | -1.04 | -1.18 | -0.48 | -0.80 | -1.64 | -0.45 | 0.00  | -1.26 | -0.33 | -1.72 | 0.02  | -0.34 | 0.40  | -0.52 | 0.47  | -0.53 | -0.85 | 0.28  |
| PPIA   | 2.37E-01 | 6.50E-01 |  | -1.71 | -0.90 | -1.01 | -0.47 | -1.02 | -1.90 | -0.72 | -1.03 | -0.62 | -1.09 | -0.73 | -1.06 | -1.11 | -0.37 | -1.04 | -1.12 | -0.85 | -0.40 | -0.77 | -0.71 | -0.71 | -0.53 | -0.59 | -0.46 |
| NDUS4  | 2.39E-01 | 6.51E-01 |  | 0.02  | -0.17 | 0.18  | -0.41 | 0.45  | -0.55 | 0.48  | -0.23 | 0.46  | 0.53  | 0.23  | 0.24  | 0.35  | -0.07 | 0.49  | 0.04  | -0.29 | -0.30 | 0.18  | 0.19  | -0.10 | 0.58  | 0.14  | 0.89  |
| VDAC1  | 2.41E-01 | 6.51E-01 |  | -0.06 | 0.06  | 0.05  | 0.18  | -0.01 | 0.07  | 0.25  | 0.06  | 0.02  | 0.13  | 0.01  | -0.04 | 0.06  | 0.03  | -0.02 | 0.00  | 0.14  | 0.36  | 0.01  | 0.16  | 0.03  | 0.13  | 0.16  | 0.16  |
| AT2B1  | 2.47E-01 | 6.62E-01 |  | 0.24  | -0.12 | -0.24 | 0.16  | 0.23  | 0.26  | 0.48  | 0.08  | 0.68  | 0.10  | -0.11 | 0.25  | -0.38 | 0.24  | -0.48 | 0.29  | 0.00  | 0.13  | 0.03  | -0.22 | 0.44  | 0.08  | 0.22  | 0.28  |
| HS12A  | 2.48E-01 | 6.62E-01 |  | 0.19  | 0.35  | 0.21  | 0.46  | 0.07  | 0.18  | 0.27  | 0.16  | -0.05 | 0.19  | 0.09  | 0.22  | 0.31  | 0.30  | 0.26  | 0.09  | 0.11  | 0.28  | 0.18  | 0.49  | 0.09  | 0.25  | 0.10  | 0.22  |
| HOME2  | 2.50E-01 | 6.62E-01 |  | -1.14 | -1.54 | -1.72 | 0.07  | -0.37 | -0.99 | 0.80  | -0.14 | -0.66 | -1.08 | -0.78 | -0.91 | -0.78 | -0.38 | -0.05 | -0.88 | -0.36 | -0.85 | -0.15 | -0.89 | -0.73 | 0.04  | -0.82 | -0.28 |
| HS90A  | 2.59E-01 | 6.82E-01 |  | -0.60 | -0.46 | -0.74 | -0.49 | -0.51 | -0.41 | 0.33  | -0.03 | -0.03 | -0.43 | -0.62 | -0.70 | -0.85 | -0.23 | -0.41 | -0.86 | -0.34 | -0.27 | -0.54 | -0.50 | -0.50 | -0.49 | -0.50 | -0.08 |
| SHLB2  | 2.63E-01 | 6.89E-01 |  | -0.27 | -0.22 | 0.06  | 0.07  | -0.21 | -0.61 | -0.24 | -0.65 | -0.48 | -0.76 | -0.09 | -0.46 | -0.03 | -0.17 | -0.94 | -0.64 | -0.30 | -0.37 | -0.18 | 0.72  | -0.42 | -0.47 | -0.20 | -0.49 |
| SEPT9  | 2.71E-01 | 6.97E-01 |  | 0.40  | -0.54 | 0.31  | -0.13 | 1.26  | 0.30  | 0.51  | 0.28  | 0.80  | 0.66  | -0.24 | 0.15  | -0.15 | 0.46  | 0.94  | 1.41  | 0.88  | 1.03  | 0.50  | 0.95  | 0.88  | 1.21  | 0.39  | -0.10 |
| ARP2   | 2.87E-01 | 6.97E-01 |  | -0.72 | -0.02 | -0.37 | -0.05 | -0.53 | -0.19 | -0.99 | -0.42 | -0.49 | 0.50  | -0.07 | -0.35 | -0.55 | -0.43 | -0.70 | -0.08 | -0.42 | -0.49 | -0.42 | -0.31 | -0.46 | -0.14 | 0.17  | -0.06 |
| CACB4  | 2.86E-01 | 6.97E-01 |  | -0.63 | -0.27 | -0.27 | -0.17 | -0.31 | -0.51 | 0.12  | -0.02 | 0.38  | -0.12 | -0.17 | -0.24 | -0.30 | 0.28  | -0.18 | -0.11 | 0.13  | 0.26  | -0.01 | -0.13 | -0.30 | -0.18 | -0.12 | 0.14  |
| COF1   | 2.83E-01 | 6.97E-01 |  | -0.43 | -0.23 | -0.49 | -0.53 | -0.94 | -0.32 | -0.61 | -0.42 | -0.50 | -0.01 | -0.01 | -0.59 | -0.30 | -0.74 | -0.49 | -0.38 | -0.37 | -0.18 | -0.57 | -0.43 | 0.12  | -0.28 | -0.49 | -0.15 |
| DLGP2  | 2.79E-01 | 6.97E-01 |  | 0.08  | -0.23 | -0.38 | -0.16 | -0.35 | -0.22 | -0.07 | 0.12  | -0.68 | 0.12  | -0.66 | -0.02 | 0.01  | -0.39 | 0.61  | -0.15 | -0.46 | -1.02 | 0.00  | -0.83 | -0.24 | -0.46 | -0.80 | 0.05  |
| EAA1   | 2.86E-01 | 6.97E-01 |  | -0.75 | -0.74 | -0.83 | -0.95 | -0.73 | -0.90 | -1.09 | -0.75 | -1.27 | -0.82 | -0.84 | -0.76 | -0.83 | -1.07 | -0.62 | -0.80 | -0.65 | -1.04 | -0.61 | -0.56 | -0.54 | -0.49 | -0.78 | -0.72 |
| GRIA1  | 2.71E-01 | 6.97E-01 |  | -0.14 | -0.50 | 0.41  | 0.79  | 0.20  | 0.42  | 0.94  | 0.63  | 0.61  | 1.50  | 0.07  | 0.93  | 1.73  | 0.63  | 0.61  | 0.60  | 0.27  | 0.80  | 0.66  | 0.32  | 1.00  | 0.64  | 0.97  | 0.42  |
| GSK3B  | 2.80E-01 | 6.97E-01 |  | 0.10  | 0.70  | -0.78 | -0.06 | -0.18 | -1.78 | -1.02 | -0.42 | -0.24 | -0.90 | -1.73 | -1.04 | -2.26 | -0.32 | -0.38 | -3.02 | -0.27 | -0.79 | -2.04 | -0.75 | -1.14 | -0.89 | -0.29 | -1.88 |
| HSP74  | 2.82E-01 | 6.97E-01 |  | 0.00  | 0.05  | -0.06 | -0.13 | 0.14  | 0.19  | 0.25  | 0.10  | 0.05  | 0.10  | -0.12 | -0.26 | -0.13 | 0.37  | 0.15  | -0.02 | -0.08 | 0.37  | 0.23  | -0.03 | -0.22 | -0.09 | 0.05  | 0.17  |
| PAK3   | 2.85E-01 | 6.97E-01 |  | -0.65 | -0.60 | -0.99 | 0.04  | -0.53 | -0.30 | -0.29 | -0.45 | 0.18  | -1.10 | -0.82 | -0.54 | -1.23 | -0.43 | -0.83 | -0.62 | -0.66 | 0.04  | -0.02 | -0.23 | -0.34 | -0.52 | -0.12 | -0.18 |
| S12A5  | 2.79E-01 | 6.97E-01 |  | -0.25 | 0.13  | 0.24  | 0.38  | 0.25  | 0.22  | 0.61  | 0.14  | 0.54  | 0.37  | 0.44  | 0.27  | 0.54  | 0.41  | 0.17  | 0.22  | 0.41  | 0.36  | 0.54  | 0.39  | 0.07  | 0.55  | 0.22  | 0.21  |
| SYT7   | 2.83E-01 | 6.97E-01 |  | -0.07 | 0.12  | 1.05  | 0.54  | -1.49 | 0.31  | -1.58 | 1.17  | 0.78  | -0.17 | -0.15 | 0.80  | -0.56 | 0.20  | 1.79  | 0.16  | 1.39  | 4.48  | 1.24  | -0.62 | 0.01  | -0.49 | 0.52  | -0.01 |
| CA2D1  | 2.91E-01 | 7.04E-01 |  | 3.34  | 3.14  | 1.61  | 3.89  | 2.37  | 3.16  | 1.85  | 2.97  | 2.80  | 3.75  | 3.23  | 2.17  | 4.36  | 2.28  | 4.07  | 3.40  | 0.88  | 3.13  | 4.42  | 2.08  | 1.08  | 2.33  | 3.29  | -0.12 |
| DIRA2  | 2.94E-01 | 7.07E-01 |  | 0.43  | 0.22  | 0.17  | 0.55  | 0.12  | 0.25  | 0.36  | 0.50  | 1.06  | 0.65  | 0.23  | 0.44  | 0.62  | 0.59  | 0.47  | 0.30  | 0.40  | 0.37  | 0.52  | 0.36  | 0.57  | 0.38  | 0.46  | 0.76  |
| ABR    | 2.98E-01 | 7.09E-01 |  | 0.84  | -0.08 | -1.05 | -0.70 | 0.94  | 0.26  | 0.14  | 0.13  | 0.64  | 0.96  | 0.15  | 0.14  | -0.85 | 0.33  | -0.19 | -0.81 | -1.51 | 0.71  | 0.08  | -0.33 | -0.12 | 0.26  | -0.44 | 0.14  |
| CNDP2  | 3.00E-01 | 7.09E-01 |  | -1.94 | -1.60 | 0.08  | -0.53 | -0.62 | -0.76 | -0.40 | -0.01 | -0.02 | -1.08 | -0.03 | -0.49 | -4.05 | -2.79 | 0.47  | -1.02 | -0.35 | -0.97 | 0.57  | -1.20 | -0.57 | -0.07 | -0.09 | -1.00 |
| COPA   | 2.99E-01 | 7.09E-01 |  | 0.35  | 1.73  | 1.26  | 1.53  | 1.33  | 1.62  | 1.21  | 1.55  | 1.27  | 1.15  | 1.01  | 2.29  | 0.45  | 0.71  | 1.94  | 0.52  | 0.10  | 1.39  | 1.80  | 1.67  | 1.98  | 1.62  | 2.27  | 1.69  |

|       |          |          |  |       |       |       |       |       |       |       |       |       |       |       |       |       |       |       |       |       |       |       |       |       |       |       |       |
|-------|----------|----------|--|-------|-------|-------|-------|-------|-------|-------|-------|-------|-------|-------|-------|-------|-------|-------|-------|-------|-------|-------|-------|-------|-------|-------|-------|
| SYT2  | 3.07E-01 | 7.21E-01 |  | -0.34 | -0.59 | -0.67 | -0.27 | -0.50 | -0.33 | -0.01 | -0.53 | -0.12 | -0.54 | -0.30 | -0.68 | -0.50 | -0.11 | -0.51 | -0.34 | -0.23 | -0.43 | -0.72 | -0.80 | -0.42 | -0.06 | -0.23 | 0.03  |
| ENOG  | 3.11E-01 | 7.21E-01 |  | -0.38 | -0.32 | -0.51 | -0.24 | -0.30 | -0.34 | 0.17  | -0.31 | -0.02 | -0.19 | -0.44 | -0.28 | -0.36 | -0.11 | -0.32 | -0.37 | -0.23 | -0.20 | -0.43 | -0.38 | -0.22 | -0.16 | 0.00  | -0.12 |
| MYPR  | 3.12E-01 | 7.21E-01 |  | 1.53  | 1.42  | 1.35  | 1.54  | 1.52  | 1.47  | 1.62  | 1.74  | 1.61  | 1.49  | 1.51  | 1.44  | 1.87  | 1.42  | 2.01  | 1.69  | 1.45  | 1.47  | 1.28  | 1.57  | 1.11  | 1.72  | 1.84  | 2.34  |
| NMDE2 | 3.10E-01 | 7.21E-01 |  | -0.35 | 0.12  | 0.75  | -0.44 | -0.37 | NA    | -0.32 | -0.19 | 0.37  | -0.08 | -1.03 | 0.32  | -0.03 | 0.47  | 0.55  | 0.51  | NA    | -0.26 | -1.17 | -0.84 | -0.18 | -0.87 | -1.66 | 0.98  |
| CNTN1 | 3.21E-01 | 7.29E-01 |  | 0.67  | 0.36  | 0.15  | 1.42  | 0.38  | 0.13  | 0.26  | -0.10 | 0.10  | 0.25  | 0.43  | 0.71  | 0.36  | 0.87  | 0.48  | 0.31  | 0.34  | 0.47  | 0.40  | 0.17  | 0.63  | 0.37  | 0.46  | 0.49  |
| ESYT2 | 3.20E-01 | 7.29E-01 |  | -0.93 | -1.94 | -2.07 | -0.89 | -1.60 | -0.57 | -1.42 | -1.46 | -1.59 | -2.10 | -2.87 | -1.52 | -0.91 | -0.59 | -1.63 | -1.73 | -1.69 | -1.72 | -1.59 | -0.96 | -1.13 | -1.70 | -1.30 | -1.87 |
| VIME  | 3.18E-01 | 7.29E-01 |  | 0.18  | -0.17 | -0.65 | -0.11 | -0.13 | 0.67  | 0.06  | 0.68  | -0.44 | 1.19  | 1.48  | -0.03 | -0.16 | 0.22  | 0.50  | 0.21  | -0.46 | 0.04  | -0.01 | 0.71  | 0.22  | 0.18  | 0.86  | 1.18  |
| RP3A  | 3.23E-01 | 7.30E-01 |  | 0.90  | 0.71  | 0.15  | 0.11  | 0.16  | 0.67  | -0.36 | 0.31  | -0.21 | 0.72  | 0.68  | 0.23  | 0.36  | -0.03 | -0.21 | -0.24 | 0.77  | 0.07  | 0.42  | 0.66  | 0.01  | 0.26  | 0.23  | 0.30  |
| PP1B  | 3.26E-01 | 7.33E-01 |  | -0.52 | -0.20 | -0.47 | 0.41  | -0.16 | 0.09  | -0.42 | 0.15  | -0.48 | 0.37  | -0.97 | 0.15  | 0.17  | -0.65 | 0.18  | -0.21 | 0.77  | 0.08  | 0.47  | 0.00  | 0.02  | -0.49 | -0.71 | -0.12 |
| PRS4  | 3.32E-01 | 7.42E-01 |  | -0.23 | -0.11 | 0.07  | -0.96 | -0.19 | 0.56  | -0.41 | -0.78 | -0.43 | -0.90 | -0.46 | -1.05 | -1.13 | -0.15 | -0.99 | -0.58 | 0.39  | -0.18 | -0.71 | -0.52 | -0.89 | -1.09 | -0.44 | -0.31 |
| CALB1 | 3.37E-01 | 7.42E-01 |  | -2.04 | -2.44 | -2.63 | -2.79 | -3.07 | -3.06 | -1.66 | -3.13 | -2.63 | -2.72 | -3.54 | -2.42 | -2.92 | -1.15 | -2.39 | -2.73 | -2.15 | -1.93 | -2.50 | -2.54 | -2.12 | -2.22 | -2.24 | -1.71 |
| IF4H  | 3.35E-01 | 7.42E-01 |  | -0.25 | -0.27 | -0.34 | -0.88 | 0.09  | 0.38  | -1.40 | -0.21 | -1.25 | -0.17 | -0.58 | -0.49 | -0.03 | -2.44 | -0.17 | -0.61 | -2.58 | -1.41 | -0.59 | -0.47 | -2.58 | -0.54 | -1.04 | -1.37 |
| NLGN2 | 3.38E-01 | 7.42E-01 |  | 0.16  | -0.63 | -0.36 | 1.29  | 0.96  | 0.67  | -0.09 | 0.55  | 0.07  | 0.05  | -0.50 | 0.42  | 0.23  | 0.32  | 1.33  | 1.25  | 1.35  | 0.21  | 1.69  | 0.34  | 0.93  | -0.44 | -0.09 | 1.00  |
| GSTM3 | 3.49E-01 | 7.64E-01 |  | 0.29  | -0.17 | -0.37 | -0.02 | -0.27 | -0.01 | -0.19 | -0.13 | -0.80 | -0.33 | 0.30  | 0.24  | 0.01  | 0.59  | -0.30 | 0.29  | 0.23  | 0.27  | -0.08 | 0.13  | 0.27  | 0.01  | 0.19  | 0.45  |
| AK1C1 | 3.54E-01 | 7.65E-01 |  | 1.09  | 0.80  | 0.40  | 1.53  | 1.84  | 1.61  | 1.38  | 0.96  | 0.90  | 1.00  | 1.12  | 0.94  | 2.16  | 0.55  | 1.75  | 1.01  | 1.31  | 0.74  | 0.93  | 1.39  | 0.37  | 1.15  | 0.93  | 1.06  |
| DYN2  | 3.54E-01 | 7.65E-01 |  | -0.19 | -0.05 | 0.17  | 0.18  | -0.02 | 0.09  | 0.21  | 0.13  | 0.22  | 0.25  | 0.01  | 0.10  | 0.15  | 0.00  | -0.08 | -0.02 | 0.16  | 0.07  | 0.16  | 0.22  | 0.00  | 0.26  | 0.21  | 0.10  |
| EFHD2 | 3.59E-01 | 7.73E-01 |  | 0.19  | 0.24  | 0.33  | 0.64  | -0.03 | 0.25  | 0.92  | 0.43  | 0.88  | 0.45  | 0.12  | 0.45  | 0.28  | 0.68  | 0.00  | 0.17  | -0.03 | 0.40  | -0.01 | 0.02  | -0.11 | 0.20  | 0.11  | 0.31  |
| GBB1  | 3.62E-01 | 7.75E-01 |  | 0.45  | 0.45  | 0.42  | 0.23  | 0.43  | 0.37  | 0.13  | 0.40  | 0.23  | 0.47  | 0.53  | 0.48  | 0.43  | 0.19  | 0.46  | 0.40  | 0.54  | 0.31  | 0.61  | 0.68  | 0.61  | 0.48  | 0.50  | 0.27  |
| ALDOA | 3.82E-01 | 7.80E-01 |  | 0.29  | 0.62  | 0.41  | 0.06  | 0.39  | 0.22  | 0.21  | 0.50  | 0.16  | 0.57  | 0.37  | 0.28  | 0.37  | 0.00  | 0.36  | 0.28  | 0.48  | 0.31  | 0.59  | 0.62  | 0.59  | 0.43  | 0.47  | 0.32  |
| ALDOA | 3.82E-01 | 7.80E-01 |  | -0.03 | -0.35 | -0.07 | -0.30 | -0.77 | 0.09  | -0.05 | -0.05 | -0.94 | -0.08 | -0.39 | -0.65 | -0.03 | -0.17 | -0.15 | -0.20 | -0.29 | -0.03 | -0.36 | -0.31 | -0.43 | 0.02  | -0.06 | -0.12 |
| AT1A1 | 3.89E-01 | 7.80E-01 |  | -0.57 | 0.26  | 0.24  | 0.13  | 0.39  | 0.30  | -0.34 | 0.18  | -0.39 | 0.31  | 0.29  | 0.45  | 0.45  | 0.20  | 0.23  | 0.65  | 0.23  | -0.02 | 0.10  | 0.28  | 0.45  | 0.31  | 0.49  | 0.30  |
| ATPA  | 3.88E-01 | 7.80E-01 |  | -0.42 | -0.54 | -0.50 | -0.24 | -0.48 | -0.42 | -0.06 | -0.54 | -0.08 | -0.45 | -0.47 | -0.51 | -0.50 | -0.10 | -0.30 | -0.47 | -0.25 | -0.10 | -0.29 | -0.25 | -0.29 | -0.28 | -0.25 | -0.09 |
| FLNC  | 3.83E-01 | 7.80E-01 |  | -0.34 | -0.32 | -0.85 | -0.38 | -1.14 | -0.60 | -0.40 | -0.45 | -0.53 | -0.69 | -0.53 | -0.39 | -0.28 | -0.57 | -0.37 | -0.78 | -0.25 | -0.45 | -0.25 | -0.41 | -0.52 | -0.17 | -0.47 | -0.30 |
| GLSK  | 3.72E-01 | 7.80E-01 |  | -0.27 | -0.45 | 0.41  | -0.01 | -0.71 | -0.12 | -0.64 | -0.37 | -0.33 | -0.33 | -0.32 | -0.12 | -0.60 | -0.53 | -0.32 | -0.24 | -0.13 | -0.65 | -0.10 | -0.27 | -0.10 | -0.46 | -0.19 | -0.63 |
| KCNA1 | 3.86E-01 | 7.80E-01 |  | 0.66  | 0.60  | 0.17  | 1.59  | 0.97  | 1.07  | 0.75  | 0.86  | 1.37  | 1.37  | 1.41  | 1.02  | 0.87  | 1.41  | 1.04  | 0.76  | 0.37  | 0.87  | 1.01  | 0.60  | 0.84  | 0.57  | 1.95  | 0.71  |
| KPCA  | 3.77E-01 | 7.80E-01 |  | 0.65  | 1.75  | 0.55  | 2.49  | 0.85  | 1.70  | 2.11  | 1.76  | 2.38  | 0.17  | 1.64  | 0.74  | 1.45  | 2.56  | 2.48  | 2.25  | 0.65  | 1.37  | 1.85  | 0.93  | 1.31  | 1.35  | 1.64  | 2.37  |
| NTRK2 | 3.84E-01 | 7.80E-01 |  | 0.38  | -0.18 | -0.95 | -0.09 | -0.10 | 0.51  | -0.24 | 0.44  | 0.40  | 0.01  | 0.37  | 0.23  | -0.01 | -0.22 | 0.21  | -0.58 | 0.18  | -0.03 | -0.39 | -0.45 | 0.16  | -0.17 | -0.11 | 1.20  |
| OPA1  | 3.74E-01 | 7.80E-01 |  | 1.27  | 0.39  | 1.01  | 0.88  | 1.00  | 0.77  | 1.15  | 0.71  | 1.82  | 1.05  | 1.20  | 1.10  | 1.37  | 1.64  | 1.12  | 1.43  | 1.51  | 1.29  | 0.35  | 1.15  | 0.96  | 1.35  | 1.45  | 0.32  |
| PSMD7 | 3.87E-01 | 7.80E-01 |  | -1.10 | -0.10 | -0.63 | -0.60 | -0.02 | -0.01 | -0.70 | -0.11 | 0.22  | -0.38 | -0.67 | -0.91 | -0.16 | -0.84 | -1.05 | -0.52 | 0.09  | -0.19 | -0.69 | -0.52 | -0.16 | -0.14 | -0.25 | -0.25 |
| RTN4  | 3.89E-01 | 7.80E-01 |  | 0.12  | 0.28  | 0.18  | 0.25  | 0.30  | -0.76 | -0.11 | 0.25  | -0.61 | -0.13 | 0.06  | -0.62 | 0.37  | 0.65  | -0.31 | -0.42 | -0.10 | 0.76  | 0.36  | -0.59 | -0.27 | -0.41 | -0.16 | -0.22 |
| SUCB1 | 3.84E-01 | 7.80E-01 |  | 0.02  | -0.12 | 0.04  | -0.13 | 0.02  | -0.15 | 0.24  | -0.31 | 0.06  | -0.18 | 0.15  | 0.05  | 0.31  | 0.22  | 0.20  | 0.01  | -0.05 | 0.25  | -0.20 | 0.19  | 0.13  | -0.05 | 0.02  | 0.58  |
| VATD  | 3.88E-01 | 7.80E-01 |  | 0.09  | 0.20  | 0.48  | 0.62  | 0.58  | 0.28  | 0.46  | 0.21  | 0.89  | 0.85  | 0.44  | 0.37  | 0.38  | 0.47  | 0.14  | 0.50  | 0.33  | 0.27  | 0.51  | 0.43  | 0.53  | 0.14  | 0.80  | 0.54  |
| ACLY  | 4.10E-01 | 7.86E-01 |  | -0.25 | -0.70 | -0.48 | -1.15 | -0.49 | -0.59 | -0.54 | -0.47 | -0.60 | -0.69 | -0.85 | -0.65 | -1.16 | -1.16 | -0.58 | -0.75 | -0.38 | -0.19 | -0.61 | -0.69 | -0.56 | -1.22 | -0.03 | -0.72 |
| AT1A2 | 4.00E-01 | 7.86E-01 |  | -0.34 | -0.13 | -0.26 | -0.20 | -0.49 | -0.25 | 0.16  | -0.18 | -0.08 | -0.17 | -0.47 | -0.46 | -0.26 | -0.13 | -0.06 | -0.12 | -0.02 | -0.12 | -0.07 | -0.24 | -0.36 | -0.04 | 0.15  | 0.12  |
| CPNE6 | 4.11E-01 | 7.86E-01 |  | 0.03  | 0.02  | -0.15 | 0.46  | -0.11 | 0.31  | 0.41  | 0.11  | 0.19  | 0.31  | 0.66  | -0.08 | 0.01  | -0.22 | -0.36 | 0.56  | 0.12  | 0.54  | 0.57  | 0.32  | 0.32  | -0.19 | -0.19 | 0.22  |
| FARP2 | 3.95E-01 | 7.86E-01 |  | 1.33  | 1.33  | 1.44  | 1.59  | 1.28  | 1.29  | 1.61  | 1.85  | 1.59  | 1.51  | 1.40  | 1.37  | 1.69  | 1.23  | 2.12  | 1.60  | 1.29  | 1.27  | 1.14  | 1.41  | 0.97  | 1.79  | 1.81  | 2.13  |
| FLOT1 | 4.08E-01 | 7.86E-01 |  | -5.09 | -6.39 | -2.95 | -1.78 | -6.17 | -5.20 | -3.50 | -6.40 | -2.22 | -5.21 | -4.32 | -5.44 | -4.20 | -2.12 | -6.68 | -5.33 | -4.49 | -3.91 | -6.04 | -5.89 | -2.33 | -4.94 | -3.40 | -1.32 |
| GDS1  | 4.05E-01 | 7.86E-01 |  | -0.16 | -0.15 | 0.09  | 0.18  | -0.48 | -0.15 | 0.62  | 0.19  | 0.62  | 0.27  | -0.03 | 0.55  | 0.23  | 0.55  | 0.07  | 0.03  | -0.03 | 0.53  | 0.04  | 0.12  | 0.30  | 0.30  | 0.33  | 0.28  |
| GRM5  | 4.00E-01 | 7.86E-01 |  | -1.52 | -2.97 | -0.84 | 0.17  | -1.32 | -1.98 | -0.70 | -0.72 | -0.49 | -1.64 | -1.34 | -2.35 | -2.91 | -1.33 | -1.56 | -1.13 | -1.41 | 0.89  | -1.47 | -0.26 | 0.37  | -1.93 | 1.10  | -0.86 |
| PIPNB | 4.10E-01 | 7.86E-01 |  | -0.40 | -0.21 | -0.57 | -0.74 | -0.05 | -0.45 | -0.69 | -0.23 | -0.74 | -0.41 | -0.53 | -0.71 | -0.53 | -1.03 | 0.09  | -0.21 | -0.20 | -0.58 | -0.24 | -0.25 | -0.11 | -0.21 | -0.25 | -0.24 |
| RALA  | 4.04E-01 | 7.86E-01 |  | 0.00  | -0.12 | -0.52 | 0.22  | 0.31  | 0.10  | 0.30  | 0.14  | 0.49  | 0.14  | -0.21 | 0.02  | -0.12 | 0.51  | 0.63  | -0.10 | 0.45  | 0.28  | 0.65  | -0.09 | 0.34  | -0.07 | 0.25  | 0.35  |
| SRC   | 4.09E-01 | 7.86E-01 |  | -0.48 | -0.59 | -0.76 | -1.05 | -0.58 | -0.04 | -1.17 | -0.61 | -0.94 | -1.05 | -0.17 | -0.54 | -0.99 | -0.62 | 0.01  | 0.10  | -0.21 | -0.77 | -0.47 | -0.60 | -0.10 | -0.11 | -0.21 | -0.49 |
| AIP   | 4.23E-01 | 7.88E-01 |  | 0.65  | 0.28  | -1.01 | -0.41 | -0.30 | 0.06  | 1.05  | 0.28  | -0.02 | -0.75 | 0.24  | -0.64 | 1.14  | -0.05 | 0.00  | 0.41  | 0.57  | 0.09  | -0.32 | -0.29 | 0.26  | -0.48 | -0.44 | -0.26 |
| ANK1  | 4.17E-01 | 7.88E-01 |  | 0.12  | 0.47  | 0.09  | 0.26  | 0.17  | 0.35  | 0.44  | 0.61  | 0.28  | 0.36  | -0.04 | 0.35  | 0.70  | 0.50  | 0.17  | 0.21  | 0.72  | 0.70  | 0.42  | 0.19  | 0.19  | 0.42  | 0.16  | 0.50  |

|       |          |          |  |       |       |       |       |       |       |       |       |       |       |       |       |       |       |       |       |       |       |       |       |       |       |       |       |
|-------|----------|----------|--|-------|-------|-------|-------|-------|-------|-------|-------|-------|-------|-------|-------|-------|-------|-------|-------|-------|-------|-------|-------|-------|-------|-------|-------|
| BDH   | 4.20E-01 | 7.88E-01 |  | -1.83 | -1.88 | -1.91 | -3.02 | -2.43 | -2.00 | -3.44 | -2.28 | -3.04 | -2.07 | -1.83 | -1.64 | -2.09 | -3.55 | -1.55 | -2.18 | -1.25 | -3.06 | -1.90 | -2.08 | -1.46 | -1.05 | -1.29 | -2.28 |
| CO3   | 4.24E-01 | 7.88E-01 |  | 0.36  | 0.11  | -0.05 | 0.29  | 0.27  | 0.15  | 0.37  | 0.42  | 0.16  | 0.76  | 0.32  | 0.49  | 0.31  | 0.37  | 0.12  | 0.22  | 0.34  | 0.43  | 0.29  | 0.19  | 0.37  | 0.15  | 0.32  | 0.74  |
| DLGP1 | 4.22E-01 | 7.88E-01 |  | -1.19 | 0.03  | 1.71  | -0.44 | 0.37  | 0.64  | 0.10  | 0.58  | 1.26  | 0.52  | 1.10  | 0.74  | 0.76  | 1.33  | 1.45  | 0.27  | 0.44  | -0.02 | 0.65  | 0.15  | 0.27  | -0.10 | 1.70  | -0.64 |
| KALRN | 4.18E-01 | 7.88E-01 |  | -1.35 | -0.26 | -0.40 | -0.02 | -0.21 | -0.37 | 0.12  | -0.67 | 0.02  | -0.84 | 1.07  | -0.46 | 0.31  | 0.41  | 0.37  | -0.07 | -0.01 | -0.28 | -0.43 | -0.74 | -1.06 | 0.13  | 0.28  | -0.50 |
| 1433G | 4.34E-01 | 7.93E-01 |  | -0.38 | -0.40 | -0.36 | -0.02 | -0.26 | -0.27 | -0.16 | -0.20 | 0.03  | -0.17 | -0.36 | -0.41 | -0.26 | -0.03 | -0.35 | -0.25 | -0.16 | -0.12 | -0.05 | -0.25 | -0.06 | 0.02  | -0.30 | -0.04 |
| 1433G | 4.34E-01 | 7.93E-01 |  | -0.36 | 0.36  | -0.22 | -0.90 | -0.35 | -0.23 | -0.84 | -1.10 | -0.66 | 0.41  | -0.87 | -0.61 | -0.16 | 0.61  | -0.49 | -0.03 | -0.11 | -0.73 | -0.28 | -0.38 | -0.22 | -0.03 | 0.06  | -0.65 |
| AK1A1 | 4.31E-01 | 7.93E-01 |  | 0.04  | -0.29 | 1.90  | 0.35  | 0.59  | -0.74 | -0.98 | 0.39  | -0.03 | 0.54  | -0.79 | -0.14 | -1.17 | 0.39  | 0.69  | 0.45  | 0.91  | 0.46  | 0.22  | 0.28  | 0.68  | 0.95  | 0.63  | 0.25  |
| AT1B1 | 4.30E-01 | 7.93E-01 |  | -0.07 | 0.17  | 0.10  | 0.22  | 0.14  | 0.19  | 0.41  | 0.01  | 0.26  | 0.09  | 0.11  | 0.22  | 0.06  | 0.44  | 0.20  | 0.21  | 0.27  | 0.35  | 0.13  | 0.12  | 0.24  | 0.36  | 0.19  | 0.42  |
| DCE1  | 4.34E-01 | 7.93E-01 |  | -0.08 | -1.63 | -1.40 | 0.39  | 0.21  | -0.39 | -0.35 | -0.22 | -1.59 | -0.52 | -0.57 | -1.33 | -0.77 | -0.40 | -0.28 | -0.07 | 0.02  | 0.04  | -1.10 | -0.13 | -1.32 | -0.08 | 0.53  | -0.18 |
| ADHX  | 4.61E-01 | 8.29E-01 |  | -0.22 | -0.62 | -0.48 | -1.25 | -1.03 | -0.27 | -0.67 | 0.04  | -0.96 | 0.11  | 0.15  | -0.17 | 0.04  | -0.88 | -0.06 | -0.22 | 0.15  | -0.78 | -0.19 | -0.07 | -0.08 | 0.34  | 0.04  | -0.49 |
| GRM1  | 4.59E-01 | 8.29E-01 |  | 0.59  | -0.48 | -2.82 | -3.05 | -2.28 | -2.28 | -0.68 | -3.40 | -2.20 | -0.51 | -2.15 | -2.60 | -1.15 | -2.42 | -3.74 | -2.12 | -1.16 | -1.03 | -1.13 | -1.65 | -1.14 | -1.15 | -1.03 | -1.02 |
| L1CAM | 4.61E-01 | 8.29E-01 |  | -0.51 | -1.21 | -0.66 | -0.86 | -1.12 | -1.03 | -0.37 | -1.41 | -0.82 | -0.34 | -0.94 | -1.11 | -0.96 | -0.81 | -0.88 | -1.11 | -0.73 | -1.10 | -1.30 | -0.81 | -0.49 | -0.27 | -0.56 | -1.02 |
| SPTA1 | 4.62E-01 | 8.29E-01 |  | 0.57  | 0.42  | 0.97  | 0.05  | 0.31  | -0.34 | 0.24  | 0.55  | 0.49  | -0.01 | 1.10  | 0.70  | 1.48  | 1.17  | -0.53 | 0.90  | -0.34 | 1.11  | -0.52 | 0.45  | -0.09 | -0.79 | 0.07  | 0.64  |
| ADT3  | 4.73E-01 | 8.31E-01 |  | 0.11  | -0.69 | -0.10 | -0.49 | -0.08 | -0.11 | -0.69 | -0.34 | -0.03 | -0.33 | 0.04  | 0.17  | 0.06  | -0.67 | -0.03 | -0.16 | -0.16 | -0.35 | 0.08  | 0.13  | -0.07 | 0.16  | 0.00  | -0.12 |
| GRP78 | 4.72E-01 | 8.31E-01 |  | -0.47 | -0.39 | -0.06 | -0.34 | -0.20 | 0.01  | 0.36  | -0.26 | 0.44  | 0.01  | -0.50 | -0.19 | -0.23 | 0.16  | -0.21 | -0.02 | -0.19 | -0.29 | -0.44 | -0.14 | 0.03  | 0.05  | -0.44 | -0.03 |
| PTPRS | 4.74E-01 | 8.31E-01 |  | 0.03  | 0.32  | 0.21  | 0.30  | 0.05  | 0.13  | 0.67  | -0.06 | 0.25  | 0.37  | 0.09  | -0.05 | 0.15  | 0.12  | -0.02 | 0.03  | 0.20  | 0.49  | 0.61  | 0.16  | 0.37  | 0.20  | 0.05  | 0.19  |
| RGS7  | 4.70E-01 | 8.31E-01 |  | 0.67  | 1.08  | 0.74  | 0.47  | 1.64  | 1.23  | 0.43  | 0.39  | 0.96  | 0.55  | -0.38 | 1.30  | 1.11  | 1.63  | 0.68  | 1.51  | 1.08  | 1.54  | 0.40  | 0.46  | 0.48  | 0.21  | 0.91  | 0.62  |
| RTN3  | 4.65E-01 | 8.31E-01 |  | -0.05 | 0.10  | 0.15  | 0.22  | -0.03 | -0.10 | 0.28  | 0.10  | 0.13  | 0.03  | -0.04 | -0.07 | -0.02 | 0.21  | 0.00  | -0.09 | 0.15  | 0.32  | 0.05  | 0.17  | -0.05 | 0.02  | 0.14  | 0.11  |
| VISL1 | 4.75E-01 | 8.31E-01 |  | 0.29  | 0.05  | -0.03 | 0.26  | 0.03  | 0.16  | 0.23  | 0.33  | 0.39  | 0.13  | 0.03  | 0.31  | 0.10  | 0.40  | 0.26  | 0.15  | 0.26  | 0.13  | 0.26  | 0.11  | 0.36  | 0.26  | 0.35  | 0.32  |
| CMC1  | 4.79E-01 | 8.33E-01 |  | 0.78  | 0.85  | 1.02  | 0.86  | 0.71  | 0.69  | 1.02  | 1.15  | 1.08  | 0.95  | 1.03  | 0.83  | 0.70  | 0.87  | 0.81  | 1.09  | 0.71  | 0.84  | 0.81  | 0.74  | 0.66  | 0.80  | 0.84  | 0.96  |
| SEPT2 | 5.20E-01 | 8.49E-01 |  | 1.13  | -0.21 | -0.06 | 1.08  | 0.41  | 0.17  | -0.12 | -0.36 | 0.28  | -0.23 | 0.12  | -0.86 | -0.49 | 0.61  | 0.85  | 0.22  | 0.05  | 0.37  | 0.46  | -0.23 | 0.39  | -0.22 | 0.34  | 0.13  |
| 1433Z | 5.15E-01 | 8.49E-01 |  | 0.06  | -0.12 | 0.08  | 0.14  | -0.08 | -1.32 | 0.21  | -0.02 | -0.24 | 0.07  | 0.32  | -0.14 | -0.06 | 0.30  | -0.10 | -0.04 | 0.05  | 0.23  | 0.17  | -0.10 | 0.45  | 0.07  | 0.11  | -0.08 |
| ACTN4 | 4.96E-01 | 8.49E-01 |  | 0.26  | 0.02  | 0.46  | 0.68  | 0.76  | 0.87  | 0.32  | 0.25  | 0.62  | 0.87  | 0.88  | 0.54  | 0.45  | 0.29  | 0.52  | 0.40  | 0.61  | 0.24  | 0.80  | 0.91  | 1.16  | 0.39  | 0.07  | 0.29  |
| ANK3  | 5.16E-01 | 8.49E-01 |  | 0.00  | 0.19  | -0.63 | -0.38 | 0.24  | -0.01 | -0.79 | -1.06 | -0.55 | 0.53  | -0.41 | -0.64 | -0.73 | -0.57 | -0.28 | 0.02  | -0.08 | -0.41 | 0.00  | -0.56 | -0.16 | 0.26  | 0.19  | 0.24  |
| CAP1  | 4.98E-01 | 8.49E-01 |  | -0.58 | -0.45 | -0.14 | -1.12 | -0.11 | -0.21 | -0.75 | -0.17 | -0.75 | -0.22 | -0.31 | -0.67 | -0.10 | -0.68 | -0.29 | -0.01 | -0.19 | -0.61 | 0.01  | 0.04  | 0.23  | -0.06 | -0.33 | -0.67 |
| GBRB1 | 5.00E-01 | 8.49E-01 |  | -0.83 | -0.21 | 0.30  | -0.35 | -1.14 | -0.98 | 0.08  | -0.17 | -0.24 | -1.69 | -0.75 | -0.44 | -0.68 | 0.00  | -0.09 | -0.53 | -0.46 | -0.46 | -0.61 | -0.68 | -0.36 | -0.12 | -0.43 | -0.11 |
| GHC1  | 5.19E-01 | 8.49E-01 |  | -0.33 | -0.63 | -0.08 | -0.43 | 0.14  | 0.88  | -0.29 | 0.41  | 0.39  | 1.09  | -0.30 | -0.51 | 0.66  | 0.29  | -0.70 | -0.47 | -0.25 | 0.63  | 0.76  | -0.28 | 0.12  | 0.33  | -0.49 | -0.59 |
| GNAI1 | 4.93E-01 | 8.49E-01 |  | 0.36  | 0.50  | 0.03  | -0.04 | 0.52  | 0.34  | -0.39 | 0.11  | -0.08 | 0.56  | 0.77  | -0.05 | 0.48  | -0.10 | 0.56  | 0.37  | 0.34  | 0.60  | 0.60  | 0.77  | 0.57  | 0.63  | 0.25  | 0.10  |
| GNAZ  | 5.03E-01 | 8.49E-01 |  | 0.38  | 0.35  | 1.07  | 0.40  | 0.21  | -0.07 | 0.19  | 0.61  | 0.98  | 0.32  | 0.55  | 0.03  | 0.35  | 0.29  | 0.18  | 0.55  | 0.50  | 0.45  | 0.54  | 0.80  | 0.53  | 0.85  | 0.28  | 0.42  |
| GRM2  | 5.02E-01 | 8.49E-01 |  | 0.77  | 1.56  | 0.96  | 1.63  | 1.04  | 1.44  | 1.41  | 1.31  | 1.45  | 1.29  | 1.25  | 1.58  | 1.07  | 1.36  | 2.05  | 1.63  | 1.13  | 2.07  | 1.25  | 1.66  | 1.51  | 1.12  | 0.90  | 1.06  |
| NDUV1 | 5.23E-01 | 8.49E-01 |  | 0.16  | 0.06  | -0.04 | 0.04  | -0.16 | 0.40  | -0.03 | -0.11 | -0.03 | 0.13  | -0.18 | 0.06  | 0.14  | -0.22 | 0.32  | 0.14  | 0.23  | -0.15 | 0.11  | 0.34  | 0.08  | 0.34  | 0.27  | 0.22  |
| PTPRZ | 5.13E-01 | 8.49E-01 |  | -0.06 | -0.53 | -0.25 | -0.56 | -0.41 | -0.35 | -0.18 | -0.59 | -0.72 | -0.19 | 0.08  | -0.87 | -0.14 | -0.59 | -1.15 | 0.32  | -0.42 | -0.42 | -0.70 | -1.06 | -0.98 | -0.79 | -0.63 | -0.65 |
| RAB3A | 5.12E-01 | 8.49E-01 |  | -0.16 | -0.13 | -0.11 | -0.28 | -0.13 | -0.09 | -0.53 | -0.08 | -0.30 | -0.08 | -0.18 | -0.09 | -0.10 | -0.51 | -0.15 | -0.23 | -0.04 | -0.30 | 0.08  | -0.03 | 0.12  | -0.03 | -0.01 | -0.30 |
| RHOA  | 5.22E-01 | 8.49E-01 |  | -0.20 | -0.22 | -0.13 | -0.76 | 0.34  | 0.11  | -0.53 | -0.25 | -0.45 | 0.35  | 0.13  | 0.08  | -0.52 | -0.91 | -0.44 | -0.12 | 0.05  | -1.31 | -0.05 | -0.18 | 0.04  | 0.18  | -0.02 | -0.87 |
| RTN1  | 5.16E-01 | 8.49E-01 |  | -0.05 | 0.10  | 0.15  | 0.22  | -0.03 | -0.10 | 0.28  | 0.10  | 0.12  | 0.03  | -0.04 | -0.07 | -0.02 | 0.24  | 0.00  | -0.09 | 0.15  | 0.32  | 0.05  | 0.17  | -0.05 | 0.03  | 0.14  | 0.11  |
| RUFY3 | 5.17E-01 | 8.49E-01 |  | -0.60 | -0.08 | -0.52 | -0.14 | 0.16  | -0.45 | -0.11 | 0.51  | 0.20  | 0.02  | -0.47 | 0.07  | 0.01  | -0.40 | -0.35 | 0.59  | 0.12  | -0.37 | 0.40  | 0.02  | 0.23  | 0.03  | 0.25  | -0.09 |
| TFR1  | 5.09E-01 | 8.49E-01 |  | -0.06 | -0.10 | -0.16 | -0.02 | 0.04  | -0.36 | 0.37  | 0.02  | 0.23  | -0.24 | -0.07 | -0.15 | 0.15  | 0.31  | 0.11  | -0.24 | 0.16  | 0.22  | -0.03 | 0.23  | 0.01  | 0.10  | 0.08  | 0.03  |
| GRIA2 | 5.31E-01 | 8.53E-01 |  | 0.16  | 0.91  | 0.81  | 0.56  | 0.78  | 0.60  | 0.77  | 0.10  | 0.87  | 0.89  | 1.04  | 0.41  | 0.68  | 0.66  | 0.37  | 0.13  | 0.60  | 0.44  | 0.49  | 0.63  | 0.77  | 0.69  | 0.44  | 0.67  |
| KPCG  | 5.29E-01 | 8.53E-01 |  | -1.25 | -1.12 | -0.87 | -1.61 | -1.25 | -1.11 | -1.76 | -1.16 | -1.63 | -1.79 | -0.92 | -1.34 | -0.80 | -1.77 | -1.41 | -0.98 | -1.09 | -1.16 | -0.78 | -0.95 | -1.01 | -1.21 | -0.93 | -1.45 |
| PRS7  | 5.29E-01 | 8.53E-01 |  | -0.91 | -0.40 | -0.77 | -0.38 | -0.70 | -0.79 | -0.38 | -0.24 | -0.15 | -0.22 | -0.94 | -0.42 | -0.63 | -0.12 | -0.61 | -0.50 | -0.37 | -0.08 | -0.49 | -0.27 | -0.41 | -0.44 | -0.21 | -0.30 |
| CTNB1 | 5.36E-01 | 8.55E-01 |  | -1.81 | -1.97 | -2.61 | -1.48 | -1.21 | -1.40 | -1.37 | -2.15 | -1.33 | -1.72 | -2.16 | -2.02 | -1.51 | -1.92 | -1.68 | -1.81 | -2.09 | -1.41 | -2.46 | -2.22 | -1.36 | -2.53 | -1.79 | -2.13 |
| NCAM2 | 5.37E-01 | 8.55E-01 |  | 0.04  | 0.31  | -0.45 | -0.54 | -0.17 | 0.27  | -0.68 | -0.48 | -0.14 | 0.34  | 0.08  | -0.44 | -0.58 | -0.33 | -0.03 | -0.12 | 0.13  | -0.11 | 0.39  | -0.40 | -0.30 | -0.37 | -1.34 | -0.01 |
| DCTN1 | 5.42E-01 | 8.60E-01 |  | -0.09 | 0.22  | 0.14  | 0.78  | 1.81  | 0.21  | -0.43 | -0.50 | -0.72 | 0.41  | 0.52  | -1.03 | 0.47  | 1.19  | -0.12 | 0.80  | 0.14  | 0.05  | -0.19 | -0.49 | -0.31 | 0.24  | 0.10  | 0.50  |
| AAKG2 | 5.49E-01 | 8.63E-01 |  | 0.29  | 0.39  | -0.17 | -0.24 | 0.54  | 0.35  | 0.20  | 1.65  | -0.34 | 0.74  | 0.86  | -0.50 | -0.58 | -0.33 | -1.40 | 1.21  | 0.54  | -0.50 | 0.76  | 0.32  | 0.18  | -0.22 | 1.04  | 0.01  |

|        |          |          |  |       |       |       |       |       |       |       |       |       |       |       |       |       |       |       |       |       |       |       |       |       |       |       |       |
|--------|----------|----------|--|-------|-------|-------|-------|-------|-------|-------|-------|-------|-------|-------|-------|-------|-------|-------|-------|-------|-------|-------|-------|-------|-------|-------|-------|
| AP2M1  | 5.59E-01 | 8.63E-01 |  | 0.00  | 0.30  | -0.11 | 0.19  | 0.11  | 0.16  | 0.35  | 0.10  | 0.47  | 0.16  | 0.00  | 0.08  | 0.04  | 0.35  | -0.02 | 0.06  | 0.26  | 0.57  | 0.13  | 0.22  | 0.11  | 0.25  | 0.08  | 0.07  |
| NDUAA  | 5.60E-01 | 8.63E-01 |  | -0.15 | -0.70 | 0.57  | 0.44  | -0.33 | 0.60  | 0.76  | 0.39  | 0.30  | -0.10 | -0.06 | -0.02 | 0.47  | 0.20  | 0.77  | 0.05  | 0.59  | 0.60  | -0.05 | 0.37  | 0.18  | 0.55  | 0.07  | 0.67  |
| ODO1   | 5.52E-01 | 8.63E-01 |  | 0.87  | -0.07 | -0.08 | 0.33  | 0.21  | 0.24  | -0.30 | 0.10  | -0.02 | -0.06 | 0.43  | 0.52  | 0.96  | -0.50 | 0.41  | -0.08 | 1.15  | -0.44 | 1.09  | 1.00  | 0.39  | 0.16  | 0.56  | 0.05  |
| RHOG   | 5.52E-01 | 8.63E-01 |  | 1.63  | 2.41  | 1.20  | -0.33 | 2.65  | 2.49  | -0.15 | 1.35  | 0.70  | 0.62  | 3.06  | 4.02  | -0.67 | -0.85 | 2.22  | 2.59  | 1.08  | 1.61  | 2.47  | -0.13 | 2.79  | 3.75  | 1.83  | 1.68  |
| SAR1B  | 5.57E-01 | 8.63E-01 |  | 2.05  | 0.91  | 0.78  | 0.77  | 0.77  | 1.34  | 0.82  | 0.44  | 1.21  | 0.55  | -0.22 | 0.69  | 0.47  | 1.10  | 0.38  | 1.15  | 1.17  | 1.07  | 0.78  | 0.39  | 0.98  | 1.33  | 0.64  | 1.34  |
| SDHB   | 5.57E-01 | 8.63E-01 |  | -0.35 | 0.19  | -0.56 | 0.02  | -0.31 | -0.63 | 0.42  | -0.48 | -0.18 | -0.52 | -0.37 | -0.34 | -0.42 | 0.02  | -0.11 | 0.03  | -0.13 | 0.19  | -0.44 | -0.16 | 0.03  | -0.07 | -0.05 | 0.20  |
| B7Z1I4 | 5.57E-01 | 8.63E-01 |  | -0.30 | -0.61 | -0.67 | -0.17 | -0.45 | -0.35 | -0.38 | -0.36 | 0.24  | -0.79 | -0.37 | -0.31 | -0.79 | -0.10 | -0.75 | -0.26 | -0.29 | -0.37 | -0.42 | -0.38 | -0.12 | -0.29 | -0.28 | 0.08  |
| ADT1   | 5.72E-01 | 8.73E-01 |  | -0.31 | -0.27 | -0.09 | -0.03 | -0.01 | -0.01 | 0.29  | -0.33 | 0.14  | -0.05 | 0.11  | -0.20 | -0.28 | 0.09  | 0.06  | -0.09 | -0.22 | 0.13  | 0.10  | -0.12 | -0.16 | 0.11  | 0.07  | 0.22  |
| KAD4   | 5.75E-01 | 8.73E-01 |  | 0.60  | 0.06  | -0.04 | 0.11  | 1.25  | 0.32  | 0.37  | 0.32  | 0.36  | -0.22 | 0.27  | 0.44  | 0.23  | 0.16  | -0.18 | 0.83  | 0.29  | 0.64  | -0.78 | 0.04  | 0.61  | 0.57  | 0.35  | 0.05  |
| RBGPR  | 5.76E-01 | 8.73E-01 |  | -0.70 | 0.57  | 0.41  | -0.79 | -0.97 | 0.91  | -1.42 | -1.19 | -0.86 | -1.34 | -0.27 | 0.02  | -1.20 | 0.39  | -1.15 | -1.63 | 0.28  | -0.44 | -0.16 | -0.47 | -0.81 | -1.40 | -1.95 | 0.23  |
| VP26B  | 5.71E-01 | 8.73E-01 |  | -1.15 | -0.06 | -0.31 | -0.23 | -0.27 | -0.40 | 0.40  | 0.05  | 0.03  | -0.18 | 0.20  | 0.09  | 0.15  | 0.36  | -1.25 | -0.98 | -0.57 | 0.17  | -0.88 | 0.08  | -0.16 | -0.10 | -0.18 | 0.22  |
| ALDR   | 5.95E-01 | 8.74E-01 |  | -0.26 | -0.64 | -0.76 | 0.37  | -0.08 | -0.08 | -0.33 | -0.10 | -0.22 | -0.04 | -0.29 | -0.09 | -0.14 | 0.07  | 0.20  | 0.01  | -0.28 | -0.10 | -0.19 | 0.17  | -0.44 | -0.19 | 0.09  | 0.47  |
| CALR   | 5.89E-01 | 8.74E-01 |  | -0.81 | -0.50 | -0.74 | -0.66 | -1.00 | -0.94 | -0.40 | -0.58 | -0.62 | -1.08 | -0.53 | -0.75 | -0.53 | -0.19 | -0.48 | -0.89 | -0.63 | -0.47 | -0.68 | -0.20 | -0.95 | -0.43 | -0.61 | -0.11 |
| CKAP5  | 5.89E-01 | 8.74E-01 |  | 1.29  | 1.14  | 1.00  | 1.48  | 1.12  | 1.43  | 1.68  | 1.81  | 1.26  | 1.93  | 2.14  | 0.96  | 1.26  | 1.36  | 1.12  | 0.99  | 0.64  | 1.37  | 1.75  | 2.30  | 1.63  | 1.28  | 1.71  | 1.71  |
| FAK2   | 5.81E-01 | 8.74E-01 |  | -0.89 | -0.30 | -0.36 | -0.19 | 0.21  | -1.13 | -0.22 | -1.25 | -1.00 | -0.75 | -1.03 | -0.06 | -0.17 | 0.08  | -0.22 | -0.39 | -0.48 | -0.58 | -0.59 | -0.19 | -0.85 | -0.68 | 0.03  | 0.52  |
| NCAM1  | 5.81E-01 | 8.74E-01 |  | -0.28 | -0.50 | -0.71 | -0.50 | -0.65 | -0.45 | -0.19 | -0.78 | -0.55 | -0.48 | -0.41 | -0.43 | -0.58 | -0.36 | -0.19 | -0.38 | -0.35 | -0.24 | -0.54 | -0.43 | -0.35 | -0.44 | -0.44 | -0.09 |
| RAB10  | 5.93E-01 | 8.74E-01 |  | 0.07  | -0.30 | 0.01  | 0.23  | -0.06 | 0.50  | 0.22  | 0.56  | -0.74 | 0.73  | 0.16  | -0.57 | 1.16  | -0.38 | 0.39  | 0.30  | 0.25  | 0.76  | 0.37  | 0.32  | -0.64 | 0.10  | 0.72  | 0.55  |
| RHG01  | 5.96E-01 | 8.74E-01 |  | 0.16  | -0.09 | 0.57  | 0.32  | 0.82  | -0.30 | 0.25  | 0.61  | 0.22  | 1.06  | 0.21  | 0.82  | 0.33  | 0.29  | 1.07  | 0.68  | 0.02  | 0.40  | 0.48  | -0.10 | 0.94  | -0.04 | 0.35  | 0.43  |
| SERA   | 5.86E-01 | 8.74E-01 |  | 0.29  | 0.45  | -0.62 | -0.19 | -0.07 | 0.11  | 0.05  | 0.11  | -0.24 | 0.03  | 0.64  | -0.45 | -0.23 | 0.47  | 0.11  | 0.15  | 0.32  | 0.29  | 0.13  | 0.59  | 0.32  | 0.01  | 0.21  | 0.36  |
| VAPB   | 5.94E-01 | 8.74E-01 |  | 0.29  | 0.03  | 0.65  | 1.28  | 0.34  | 0.44  | 0.30  | -0.61 | -0.82 | -0.76 | 0.74  | 0.11  | 0.46  | -0.80 | 0.86  | -0.48 | 0.23  | 0.20  | -1.09 | 1.35  | 0.18  | -0.73 | 0.22  | -0.98 |
| CXA1   | 6.00E-01 | 8.75E-01 |  | 0.12  | -0.52 | 0.21  | 0.33  | 1.54  | -1.24 | 2.69  | 1.11  | 0.10  | -0.31 | -0.49 | 1.71  | 0.12  | 0.15  | 0.08  | 0.22  | 1.55  | 0.03  | 0.14  | 1.80  | 0.01  | 0.41  | -0.20 | 1.49  |
| SV2A   | 5.99E-01 | 8.75E-01 |  | -0.53 | -0.40 | -0.22 | -0.24 | -0.15 | -0.25 | 0.12  | -0.44 | -0.10 | -0.12 | -0.67 | -0.17 | -0.27 | -0.14 | -0.30 | -0.15 | -0.38 | 0.08  | -0.21 | 0.16  | -0.43 | -0.20 | 0.11  | -0.05 |
| C2C2L  | 6.14E-01 | 8.92E-01 |  | -0.07 | 0.30  | 0.10  | 0.50  | 0.02  | 0.01  | 0.40  | 0.11  | 0.16  | 0.12  | 0.36  | -0.01 | -0.13 | 0.18  | -0.23 | 0.08  | 0.06  | 0.24  | 0.29  | 0.21  | 0.33  | 0.32  | -0.27 | 0.04  |
| SDHA   | 6.19E-01 | 8.95E-01 |  | -0.59 | 0.28  | 0.05  | -0.35 | -0.26 | -1.08 | 0.06  | -1.07 | 0.02  | -1.04 | -0.42 | 0.36  | -0.39 | -0.80 | -0.54 | -0.63 | -0.18 | -0.08 | -0.92 | -0.47 | -0.53 | -0.58 | -0.22 | -0.67 |
| CPNS1  | 6.23E-01 | 8.98E-01 |  | -0.85 | -0.40 | -0.71 | 1.08  | -1.16 | 0.66  | 0.69  | -0.92 | 0.28  | -0.03 | 0.07  | 0.80  | -0.83 | 0.41  | -0.16 | 1.45  | 0.16  | 0.61  | 0.51  | 0.42  | -0.03 | -0.31 | -0.31 | -0.29 |
| QCR2   | 6.27E-01 | 8.98E-01 |  | -1.27 | 0.00  | -0.14 | -0.36 | -2.10 | -1.52 | 0.47  | 0.15  | 0.00  | -0.28 | -0.63 | -0.79 | -0.32 | -0.32 | 0.48  | -0.80 | 0.40  | 0.29  | -0.46 | -0.25 | -0.03 | 0.02  | -0.38 | 0.00  |
| SYGP1  | 6.25E-01 | 8.98E-01 |  | -0.35 | 0.76  | 0.59  | -1.68 | 0.24  | 1.86  | -0.36 | 1.95  | -0.22 | 0.81  | 0.68  | 1.00  | 0.20  | 0.19  | -0.29 | -0.77 | 1.26  | -0.19 | -0.01 | 0.33  | 2.33  | 0.49  | -0.10 | -1.55 |
| IDH3A  | 6.34E-01 | 9.01E-01 |  | -0.03 | 0.16  | 0.21  | -0.22 | 0.04  | 0.27  | 0.00  | 0.36  | -0.13 | 0.64  | 0.27  | 0.36  | 0.31  | -0.19 | 0.29  | 0.03  | 0.45  | -0.07 | 0.37  | 0.27  | 0.14  | 0.32  | 0.36  | -0.01 |
| USO1   | 6.33E-01 | 9.01E-01 |  | 1.77  | 1.63  | 1.45  | 1.95  | 1.68  | 1.67  | 1.81  | 1.80  | 1.56  | 1.58  | 2.08  | 1.65  | 1.93  | 1.37  | 1.77  | 1.95  | 1.47  | 1.65  | 1.52  | 1.64  | 1.13  | 2.01  | 2.21  | 2.46  |
| ACSL6  | 6.41E-01 | 9.09E-01 |  | 0.08  | -0.64 | 0.51  | -0.36 | -0.78 | 0.53  | 0.01  | -0.02 | 0.59  | -0.03 | 0.23  | 0.13  | -0.25 | -0.14 | 0.11  | 0.04  | 0.32  | -0.53 | 0.10  | -1.27 | 0.30  | -0.04 | -0.40 | 0.39  |
| AKA12  | 6.48E-01 | 9.15E-01 |  | 0.11  | 1.07  | 0.56  | 0.72  | 1.48  | 1.46  | 0.66  | 0.43  | 1.76  | 0.98  | 0.03  | 1.56  | 1.67  | 1.55  | 0.86  | 0.85  | -0.08 | 0.85  | 1.77  | 1.79  | 0.11  | 0.35  | 0.94  | 1.19  |
| ANXA3  | 6.60E-01 | 9.22E-01 |  | 4.05  | 4.94  | 4.25  | 3.62  | 4.20  | 4.08  | 3.08  | 4.78  | 2.18  | 3.65  | 4.29  | 3.75  | 3.60  | 2.55  | 3.64  | 4.01  | 5.08  | 2.81  | 3.82  | 4.07  | 5.55  | 2.72  | 4.70  | 3.80  |
| ARP3   | 6.71E-01 | 9.22E-01 |  | -0.50 | -0.13 | -0.19 | -0.76 | -0.28 | -0.54 | -0.88 | -0.52 | -0.86 | -0.60 | -0.41 | -0.21 | -0.25 | -0.59 | -0.54 | -0.40 | -0.02 | -1.07 | -0.13 | -0.12 | -0.02 | -0.02 | -0.25 | -0.60 |
| CNTN2  | 6.71E-01 | 9.22E-01 |  | 1.53  | 1.05  | 0.86  | 0.39  | -0.39 | 1.80  | 1.21  | 0.82  | 0.70  | 0.77  | 1.35  | 0.01  | 0.72  | 1.40  | 0.70  | 1.46  | 1.14  | 1.75  | 1.68  | 0.98  | 0.43  | 0.90  | 1.31  | 2.74  |
| DLG2   | 6.68E-01 | 9.22E-01 |  | -0.19 | 0.88  | -0.20 | 0.29  | 0.05  | 0.08  | 0.13  | -0.27 | -0.01 | -0.53 | 0.03  | 0.05  | -0.23 | 0.33  | 0.21  | -0.08 | -0.19 | 0.50  | 0.12  | 0.52  | 0.21  | 0.32  | -0.20 | -0.41 |
| IPO5   | 6.71E-01 | 9.22E-01 |  | -0.88 | -0.14 | -0.17 | -1.88 | 0.08  | -0.70 | -0.72 | -0.18 | -1.32 | -1.12 | 0.07  | -0.54 | -0.72 | -1.00 | -1.55 | -0.28 | -0.40 | -0.72 | 0.06  | -0.49 | -0.65 | -0.71 | -0.09 | -0.66 |
| NAC1   | 6.67E-01 | 9.22E-01 |  | 0.02  | 1.22  | -0.57 | -0.53 | -0.27 | -0.69 | 0.96  | 0.39  | -1.38 | 1.08  | -1.12 | 0.20  | 1.22  | 0.54  | -0.31 | 0.33  | 0.55  | -0.22 | 0.58  | 0.75  | 0.68  | 0.68  | -0.49 | 1.16  |
| PTPRA  | 6.63E-01 | 9.22E-01 |  | -5.05 | -4.96 | -5.35 | -5.77 | -5.30 | -5.40 | -5.15 | -5.08 | -6.03 | -5.36 | -4.53 | -4.84 | -4.61 | -6.64 | -5.59 | -5.27 | -5.03 | -6.46 | -4.80 | -4.87 | -4.14 | -5.39 | -4.09 | -5.35 |
| STIP1  | 6.64E-01 | 9.22E-01 |  | -0.09 | -0.09 | -0.04 | -0.62 | 0.13  | -0.21 | -0.15 | 0.37  | -0.20 | 0.00  | -0.08 | -0.16 | -0.15 | -0.07 | -0.27 | -0.21 | 0.00  | -0.49 | 0.14  | 0.05  | -0.04 | -0.37 | 0.06  | -0.36 |
| PRS6A  | 6.82E-01 | 9.31E-01 |  | -0.50 | -0.84 | -0.51 | -0.57 | -0.78 | -1.75 | -0.31 | -1.15 | -0.32 | -1.44 | -0.99 | -0.65 | -0.35 | -0.35 | -1.17 | -0.95 | -0.83 | -0.22 | -0.63 | -0.80 | -0.31 | -0.61 | -1.15 | -0.24 |
| SNAA   | 6.81E-01 | 9.31E-01 |  | -0.03 | -0.05 | 0.06  | 0.11  | -0.24 | -0.25 | 0.17  | -0.16 | 0.10  | 0.13  | 0.01  | -0.22 | -0.26 | 0.24  | -0.01 | -0.27 | 0.03  | 0.21  | -0.12 | 0.16  | 0.14  | 0.10  | -0.29 | 0.06  |
| SEPT5  | 7.98E-01 | 9.34E-01 |  | 0.84  | 0.82  | 0.45  | 0.24  | 1.55  | 0.28  | 0.31  | 0.32  | 0.33  | 0.70  | 0.40  | 0.13  | 0.40  | 0.36  | 0.12  | 0.52  | 0.43  | 0.78  | 0.76  | 0.36  | 0.70  | 0.63  | 0.28  | 0.48  |
| 4F2    | 7.32E-01 | 9.34E-01 |  | -0.19 | -0.29 | 0.14  | 0.25  | -0.03 | -0.25 | 0.14  | 0.12  | -0.01 | -0.10 | 0.01  | -0.14 | -0.09 | 0.11  | 0.09  | -0.13 | 0.05  | 0.31  | 0.20  | -0.12 | -0.10 | -0.06 | -0.07 | 0.03  |
| AATC   | 7.25E-01 | 9.34E-01 |  | -0.31 | -0.25 | 0.11  | 0.22  | 0.14  | -0.26 | 0.19  | -0.11 | 0.09  | -0.13 | -0.29 | -0.05 | 0.17  | 0.08  | -0.23 | -0.19 | 0.08  | 0.23  | -0.06 | -0.12 | 0.11  | 0.13  | 0.13  | 0.02  |

|       |          |          |  |       |       |       |       |       |       |       |       |       |       |       |       |       |       |       |       |       |       |       |       |       |       |       |       |
|-------|----------|----------|--|-------|-------|-------|-------|-------|-------|-------|-------|-------|-------|-------|-------|-------|-------|-------|-------|-------|-------|-------|-------|-------|-------|-------|-------|
| ANK2  | 7.95E-01 | 9.34E-01 |  | -0.20 | -0.28 | -0.16 | -0.31 | 0.08  | -0.20 | 0.20  | -0.72 | 0.34  | -0.03 | -0.46 | -0.49 | -0.16 | -0.04 | 0.19  | -0.17 | -0.28 | 0.14  | 0.07  | -0.14 | -0.05 | 0.22  | -0.25 | 0.12  |
| AP1B1 | 6.89E-01 | 9.34E-01 |  | 0.08  | 0.29  | 0.28  | -0.28 | 0.37  | 0.02  | -0.46 | 0.11  | -0.20 | 0.31  | 0.36  | 0.27  | 0.22  | -0.40 | 0.28  | 0.21  | 0.43  | -0.21 | 0.54  | 0.56  | 0.44  | 0.35  | 0.31  | -0.11 |
| AP2B1 | 7.01E-01 | 9.34E-01 |  | -0.09 | 0.48  | 0.58  | 0.33  | 0.10  | 0.31  | 0.37  | 0.36  | 0.33  | 0.32  | 0.36  | 0.30  | 0.36  | 0.27  | -0.12 | 0.05  | 0.21  | 0.39  | 0.43  | 0.18  | 0.45  | 0.05  | 0.34  | 0.22  |
| AP3B2 | 6.97E-01 | 9.34E-01 |  | -0.30 | 0.05  | -0.46 | -0.29 | -0.11 | -0.23 | 0.46  | -0.05 | 0.44  | -0.37 | 0.16  | 0.22  | 0.07  | 0.30  | -0.02 | -0.56 | 0.23  | -0.04 | -0.38 | 0.12  | 0.43  | -0.11 | -0.45 | 0.37  |
| ARPC2 | 7.07E-01 | 9.34E-01 |  | -0.92 | -0.73 | -0.74 | -0.88 | -0.94 | -0.25 | -0.95 | -0.52 | -0.24 | -1.06 | -0.70 | -0.69 | -0.47 | -0.66 | -0.96 | -1.06 | -0.50 | -0.80 | -1.09 | -0.42 | -1.03 | -0.88 | -0.83 | -0.96 |
| AT1A3 | 6.90E-01 | 9.34E-01 |  | 0.43  | 0.42  | 0.35  | 0.15  | 0.49  | 0.37  | 0.14  | 0.49  | 0.10  | 0.42  | 0.27  | 0.20  | 0.41  | -0.15 | 0.51  | 0.45  | 0.46  | 0.19  | 0.33  | 0.37  | 0.33  | 0.57  | 0.47  | 0.44  |
| ATLA1 | 8.02E-01 | 9.34E-01 |  | 0.15  | -0.45 | 0.81  | -1.25 | 0.68  | 0.32  | -1.11 | -0.16 | 0.11  | -0.59 | 0.53  | 0.12  | -0.19 | 1.06  | 0.52  | 0.30  | 0.47  | -0.26 | 0.81  | -0.35 | 0.27  | 0.36  | 0.06  | -0.36 |
| ATPB  | 7.87E-01 | 9.34E-01 |  | -0.47 | -0.39 | -0.53 | -0.22 | -0.60 | -0.30 | -0.11 | -0.40 | -0.25 | -0.57 | -0.56 | -0.22 | -0.47 | -0.22 | -0.14 | -0.60 | -0.42 | -0.17 | -0.42 | -0.51 | -0.43 | -0.24 | -0.24 | -0.04 |
| CACB3 | 7.25E-01 | 9.34E-01 |  | -0.46 | 0.65  | 0.50  | 0.51  | 0.09  | 0.15  | -0.95 | -0.05 | 0.91  | -1.37 | 0.40  | -0.49 | -0.31 | 0.35  | -0.22 | -0.18 | -0.57 | 0.98  | 1.05  | 0.29  | 1.14  | 0.71  | -0.15 | -0.79 |
| CDC42 | 7.57E-01 | 9.34E-01 |  | -0.12 | 0.06  | -0.31 | -1.00 | 0.13  | 0.29  | -1.29 | -0.17 | -1.08 | 0.10  | -0.40 | 0.01  | 0.16  | -0.92 | 0.16  | 0.24  | 0.11  | -1.38 | -0.50 | 0.04  | 0.29  | 0.32  | 0.17  | -0.34 |
| CDK5  | 7.70E-01 | 9.34E-01 |  | 0.53  | -0.31 | -0.12 | -0.55 | -0.82 | 0.42  | -1.48 | -0.49 | -0.90 | -0.15 | 0.08  | 0.39  | 0.05  | -0.80 | 0.08  | -0.26 | -0.22 | -0.28 | -0.32 | 0.12  | -0.58 | 0.08  | -0.04 | -0.89 |
| CLAP2 | 7.40E-01 | 9.34E-01 |  | 0.48  | -0.44 | -0.23 | 0.51  | -0.82 | 0.56  | -0.74 | -0.87 | -0.69 | 0.07  | -0.68 | 0.72  | -0.43 | -0.46 | 0.21  | -0.12 | 0.22  | -0.37 | -0.89 | -0.29 | -0.48 | -0.14 | -0.09 | 0.18  |
| CN37  | 7.00E-01 | 9.34E-01 |  | 1.67  | 1.42  | 1.41  | 1.12  | 1.54  | 1.33  | 0.64  | 1.32  | 0.74  | 1.34  | 1.44  | 1.33  | 1.63  | 0.68  | 1.68  | 1.51  | 1.30  | 0.49  | 0.97  | 1.30  | 0.84  | 1.19  | 1.70  | 1.52  |
| CPT1A | 7.74E-01 | 9.34E-01 |  | 0.77  | 0.11  | 0.84  | 1.27  | 1.46  | 1.30  | 0.94  | 0.46  | 1.81  | 0.86  | -0.09 | 0.86  | 0.89  | 1.02  | 0.98  | 0.29  | 0.69  | 0.83  | 1.67  | 0.93  | 0.43  | 0.48  | 0.96  | 0.53  |
| CTNA1 | 7.30E-01 | 9.34E-01 |  | -0.11 | 0.34  | -0.87 | -1.43 | -2.49 | -0.58 | -0.30 | -0.12 | -0.53 | -0.34 | -2.26 | -1.51 | -0.30 | -2.34 | -0.41 | -1.54 | -1.23 | -0.27 | 0.30  | -0.90 | -0.62 | -0.99 | -0.34 | -0.18 |
| DCE2  | 7.10E-01 | 9.34E-01 |  | -0.62 | -0.34 | -0.53 | -0.95 | -0.66 | -0.43 | -0.43 | -1.17 | -1.25 | -0.47 | -1.22 | -0.80 | -0.99 | -0.64 | 0.04  | -0.35 | -0.27 | -0.31 | -1.49 | 0.04  | -0.52 | -0.32 | -1.08 | -0.31 |
| DLG3  | 8.01E-01 | 9.34E-01 |  | -0.77 | -0.52 | 1.21  | 0.01  | 1.09  | 0.25  | -1.01 | -0.11 | -1.11 | -0.77 | -0.28 | 0.61  | -0.37 | -1.19 | 0.22  | 0.22  | 0.27  | -0.15 | -0.26 | 0.66  | 0.37  | 0.29  | 0.40  | -0.29 |
| FARP1 | 7.78E-01 | 9.34E-01 |  | 0.02  | -1.25 | -1.12 | -0.49 | -0.69 | -0.87 | -0.29 | 0.09  | -0.86 | -1.19 | -0.03 | -0.36 | -1.13 | -0.68 | -0.98 | -0.72 | -1.08 | 0.68  | -1.62 | 0.39  | -0.34 | 0.23  | -0.48 | -0.62 |
| GDAP1 | 7.97E-01 | 9.34E-01 |  | 0.17  | -0.44 | 1.17  | -1.48 | 1.17  | -0.01 | -0.40 | 1.64  | 0.06  | -1.46 | 0.43  | 0.11  | -0.55 | -0.34 | -0.18 | 1.24  | -0.49 | -1.01 | 0.94  | -0.52 | 0.22  | -0.23 | -1.18 | 1.17  |
| GDIA  | 7.17E-01 | 9.34E-01 |  | -0.31 | -0.36 | -0.68 | -0.74 | -0.42 | -0.46 | -0.80 | -0.17 | -0.56 | -0.73 | -0.66 | -0.29 | -0.41 | -0.71 | -0.40 | -0.58 | -0.30 | -0.62 | -0.39 | -0.53 | -0.19 | -0.30 | -0.24 | -0.65 |
| GEPH  | 7.75E-01 | 9.34E-01 |  | -0.03 | 0.02  | 0.26  | -0.28 | -0.58 | -0.15 | -0.42 | 0.18  | -0.23 | -0.13 | 0.41  | 0.24  | 0.13  | -0.30 | -0.51 | -0.14 | -0.30 | 0.52  | 0.99  | -0.64 | 0.73  | 0.00  | -0.50 | -0.16 |
| GLPK  | 7.51E-01 | 9.34E-01 |  | -0.14 | -0.86 | -0.54 | 0.53  | 0.40  | -0.26 | -0.29 | 0.01  | -0.27 | -0.04 | 0.68  | -0.15 | -0.28 | 0.07  | 0.00  | -1.00 | -0.38 | 0.57  | 0.47  | -0.23 | -0.15 | 0.39  | -0.41 | -0.48 |
| GNAQ  | 7.54E-01 | 9.34E-01 |  | -0.03 | 0.45  | -0.25 | -0.19 | -0.03 | 0.20  | 0.03  | -0.56 | -0.14 | -0.43 | -0.14 | -0.03 | 0.07  | 0.18  | -0.11 | -0.13 | -0.05 | -0.11 | 0.04  | -0.20 | 0.31  | 0.03  | -0.04 | -0.14 |
| HXK1  | 7.05E-01 | 9.34E-01 |  | 0.56  | 0.10  | 0.06  | 0.31  | 0.06  | -0.26 | 0.36  | 0.20  | 0.41  | -0.07 | 0.37  | 0.86  | 0.25  | 0.30  | -0.07 | 0.23  | 0.18  | 0.50  | 0.47  | 0.09  | 0.72  | 0.11  | 0.00  | 0.28  |
| IQEC1 | 7.74E-01 | 9.34E-01 |  | 1.61  | 0.11  | 0.19  | 0.74  | 1.33  | -0.24 | 1.55  | 1.11  | 0.31  | 1.68  | 3.06  | 0.83  | -0.67 | 1.31  | 2.27  | 0.85  | -0.31 | 0.52  | 2.45  | -1.40 | 0.53  | 0.95  | 0.62  | 1.95  |
| KAD1  | 7.92E-01 | 9.34E-01 |  | -0.54 | -0.39 | -0.57 | -0.44 | -0.32 | -0.40 | -0.17 | -0.76 | -0.33 | -0.51 | -0.24 | -0.50 | -0.44 | -0.06 | -0.57 | -0.37 | -0.23 | -0.27 | -0.35 | -0.48 | -0.32 | -0.49 | -0.37 | -0.24 |
| M2OM  | 7.86E-01 | 9.34E-01 |  | -0.01 | 0.11  | 0.37  | 0.29  | -0.04 | -0.04 | 0.37  | 0.22  | 0.25  | 0.33  | 0.05  | -0.08 | 0.31  | 0.28  | 0.21  | -0.17 | 0.44  | 0.27  | 0.17  | 0.30  | -0.23 | 0.72  | 0.23  | 0.55  |
| NBEA  | 7.32E-01 | 9.34E-01 |  | -0.58 | -0.64 | -0.04 | -0.62 | -1.10 | -0.32 | 0.34  | 0.08  | -0.03 | -1.14 | -0.02 | -0.48 | -0.32 | 0.10  | -0.22 | 0.17  | -0.63 | -0.29 | -0.08 | -0.23 | -0.45 | 0.31  | -0.05 | -0.46 |
| NCDN  | 7.64E-01 | 9.34E-01 |  | 0.22  | 0.21  | 0.22  | 0.84  | 0.89  | 0.09  | 0.98  | 0.61  | 0.50  | 0.82  | 0.23  | 1.01  | 0.11  | 0.76  | 0.31  | 0.54  | 0.88  | 0.71  | 0.38  | 0.16  | 0.59  | 0.60  | 0.36  | 0.36  |
| NRX1A | 7.34E-01 | 9.34E-01 |  | 2.68  | -0.65 | 0.87  | 0.71  | 0.78  | -0.14 | 0.75  | 0.57  | 1.16  | 0.60  | -0.25 | 1.49  | 0.07  | 0.94  | 0.75  | 0.78  | 0.21  | 0.41  | -0.35 | 0.50  | 0.68  | 0.98  | 0.67  | 1.05  |
| NSF   | 7.65E-01 | 9.34E-01 |  | -0.15 | -0.09 | -0.34 | -0.55 | 0.18  | -0.25 | -0.43 | -0.19 | -0.43 | -0.29 | -0.39 | -0.32 | -0.21 | -0.55 | -0.22 | -0.21 | -0.08 | -0.49 | -0.02 | -0.34 | -0.13 | -0.12 | -0.07 | -0.45 |
| PAK1  | 7.87E-01 | 9.34E-01 |  | 0.56  | 0.20  | 0.56  | 0.49  | -0.51 | 0.71  | 0.93  | 0.68  | -0.02 | 1.62  | 0.07  | 0.45  | -0.11 | -1.02 | 0.56  | 0.44  | -0.39 | 0.77  | 0.88  | 1.44  | -0.36 | 1.52  | -0.09 | 0.82  |
| PP2AA | 7.81E-01 | 9.34E-01 |  | -0.08 | 0.44  | -0.08 | -0.58 | 0.15  | 0.12  | -1.00 | 0.00  | -0.69 | 0.12  | 0.00  | 0.09  | -0.05 | -0.58 | 0.03  | 0.10  | 0.20  | -0.45 | 0.00  | 0.62  | 0.25  | 0.30  | 0.16  | -0.05 |
| PSD12 | 7.17E-01 | 9.34E-01 |  | -0.15 | -0.01 | -0.61 | 0.24  | -0.74 | -0.21 | -0.23 | -0.11 | -0.22 | -0.24 | 0.02  | -0.07 | -0.10 | -0.35 | -0.15 | -0.19 | -0.08 | 0.06  | -0.27 | 0.06  | -0.62 | 0.07  | -0.07 | -0.17 |
| RAB1A | 7.51E-01 | 9.34E-01 |  | -0.25 | 0.14  | -0.13 | 0.13  | -0.05 | 0.01  | 0.53  | -0.04 | 0.26  | 0.05  | -0.22 | -0.27 | -0.18 | 0.38  | 0.08  | -0.03 | 0.24  | 0.45  | -0.06 | -0.05 | 0.12  | 0.28  | -0.01 | 0.15  |
| RAP1A | 7.61E-01 | 9.34E-01 |  | 0.34  | 0.52  | 0.81  | 0.38  | 0.36  | 0.35  | 0.01  | 0.83  | -0.05 | 0.34  | 0.91  | 0.37  | 0.58  | -0.89 | 0.62  | 0.57  | 0.21  | 0.53  | 0.38  | 0.99  | 0.32  | 0.69  | 1.02  | 0.59  |
| RHG35 | 7.89E-01 | 9.34E-01 |  | 1.42  | 1.15  | 1.25  | 1.49  | 1.35  | 1.79  | 1.33  | 1.48  | 1.58  | 1.61  | 1.58  | 1.21  | 2.06  | 1.50  | 2.13  | 0.89  | 1.55  | 1.43  | 0.99  | 1.63  | 0.68  | 1.71  | 1.96  | 2.57  |
| ROA2  | 7.17E-01 | 9.34E-01 |  | -1.17 | -0.84 | -0.08 | -0.87 | -0.62 | -0.63 | -0.42 | -0.75 | -0.53 | -0.79 | -0.53 | -0.70 | -0.63 | -0.52 | -0.47 | -0.76 | -0.24 | -0.70 | -1.16 | -0.86 | -0.53 | -0.49 | -0.54 | -0.34 |
| SYN2  | 7.61E-01 | 9.34E-01 |  | 0.60  | 0.60  | 0.42  | 0.40  | 0.25  | 0.39  | 0.44  | 0.37  | 0.20  | 0.55  | 0.63  | 0.46  | 0.30  | 0.46  | 0.58  | 0.35  | 0.49  | 0.44  | 0.59  | 0.55  | 0.91  | 0.51  | 0.33  | 0.23  |
| SYT1  | 7.53E-01 | 9.34E-01 |  | 0.60  | 0.63  | 0.58  | 0.57  | 0.62  | 0.50  | 0.65  | 0.51  | 0.60  | 0.60  | 0.54  | 0.51  | 0.50  | 0.83  | 0.21  | 0.40  | 0.48  | 0.71  | 0.66  | 0.63  | 0.73  | 0.44  | 0.45  | 0.49  |
| UBP5  | 6.91E-01 | 9.34E-01 |  | -0.05 | 0.15  | 0.15  | -0.30 | 0.14  | 0.03  | 0.09  | -0.51 | 0.08  | -0.10 | 0.21  | -0.19 | 0.00  | -0.14 | 0.15  | -0.22 | 0.39  | 0.32  | -0.04 | -0.01 | 0.11  | 0.08  | -0.26 | 0.06  |
| VATA  | 7.36E-01 | 9.34E-01 |  | 0.10  | 0.34  | 0.20  | 0.25  | 0.16  | 0.03  | 0.31  | 0.03  | 0.57  | 0.14  | 0.11  | 0.15  | 0.51  | 0.30  | 0.08  | 0.14  | 0.38  | 0.21  | 0.28  | 0.21  | 0.33  | 0.36  | 0.14  | 0.30  |
| VATC1 | 7.82E-01 | 9.34E-01 |  | 0.15  | -0.32 | -0.35 | -1.25 | -0.09 | -0.23 | -1.19 | -0.18 | -1.20 | -0.31 | -1.05 | -0.37 | -0.18 | -1.25 | -0.40 | -0.19 | -0.34 | -1.24 | -0.34 | -0.35 | 0.37  | -0.32 | 0.07  | -0.88 |
| VATH  | 7.69E-01 | 9.34E-01 |  | 0.13  | 0.18  | 0.01  | 0.41  | -0.10 | 0.13  | 0.55  | -0.16 | 0.29  | 0.28  | 0.25  | 0.19  | 0.20  | 0.14  | 0.26  | 0.29  | 0.38  | 0.31  | 0.31  | 0.07  | 0.19  | 0.17  | 0.21  | 0.37  |

|       |          |          |  |       |       |       |       |       |       |       |       |       |       |       |       |       |       |       |       |       |       |       |       |       |       |       |       |
|-------|----------|----------|--|-------|-------|-------|-------|-------|-------|-------|-------|-------|-------|-------|-------|-------|-------|-------|-------|-------|-------|-------|-------|-------|-------|-------|-------|
| VDAC3 | 7.61E-01 | 9.34E-01 |  | -0.16 | -0.41 | -0.24 | -0.12 | -0.26 | -0.29 | 0.11  | -0.21 | -0.08 | -0.18 | -0.30 | -0.30 | -0.44 | -0.06 | -0.25 | -0.26 | -0.14 | 0.14  | -0.40 | -0.15 | -0.19 | -0.15 | -0.15 | 0.04  |
| VGLU1 | 7.53E-01 | 9.34E-01 |  | -0.09 | 0.25  | -0.23 | 0.08  | -0.07 | -0.18 | -0.35 | -0.03 | 0.40  | -0.19 | -0.13 | -0.35 | 0.42  | 0.39  | -0.54 | -0.41 | 0.22  | 0.19  | -0.07 | 0.04  | 0.49  | 0.35  | -0.02 | -0.22 |
| VGLU2 | 7.34E-01 | 9.34E-01 |  | 0.01  | -0.20 | -3.25 | -0.84 | 0.08  | 0.62  | -1.11 | 0.73  | -2.61 | 0.97  | 2.41  | 0.15  | -1.56 | -1.10 | 0.47  | -0.71 | -2.29 | 0.09  | 0.64  | -0.31 | -0.04 | -0.75 | 0.58  | -1.07 |
| VPP1  | 7.95E-01 | 9.34E-01 |  | 0.25  | 0.04  | 0.74  | 0.67  | 0.58  | 0.75  | 0.44  | 0.45  | 0.71  | 0.39  | 0.18  | 0.55  | 0.10  | 0.74  | 0.40  | 0.54  | 0.11  | 0.49  | 0.31  | 0.43  | 0.43  | 0.50  | 0.12  | 0.39  |
| SEPT4 | 8.23E-01 | 9.34E-01 |  | 0.51  | 0.69  | 0.01  | 0.55  | 0.63  | 0.74  | 0.23  | 0.24  | 0.79  | 0.49  | 0.39  | 0.56  | 0.86  | 0.55  | 0.23  | 0.55  | 0.38  | 0.60  | 0.67  | 0.20  | 0.71  | 0.86  | 0.62  | 0.38  |
| SEPT8 | 8.25E-01 | 9.34E-01 |  | 0.64  | 0.57  | 0.97  | 0.14  | 1.63  | 0.31  | 0.08  | 0.99  | 0.28  | 0.69  | 1.24  | 0.83  | 0.99  | 0.62  | 0.98  | 0.35  | 1.12  | 0.36  | 0.12  | 0.30  | 0.57  | 0.97  | 1.07  | 0.83  |
| 3HIDH | 8.27E-01 | 9.34E-01 |  | -0.70 | -1.07 | -1.41 | -0.93 | -1.22 | -0.67 | -0.15 | -0.79 | -0.89 | -0.10 | -1.67 | -1.43 | -0.65 | -0.79 | -1.00 | -1.64 | -1.28 | -0.28 | -0.22 | -1.12 | -0.85 | -0.28 | -1.17 | -0.91 |
| CTRO  | 8.09E-01 | 9.34E-01 |  | 0.85  | -0.23 | -0.24 | 0.45  | -0.16 | -1.18 | 1.89  | -0.92 | 0.21  | -0.76 | -1.93 | 0.48  | 1.77  | -0.02 | -0.91 | -0.40 | 0.26  | 0.25  | 0.95  | 0.13  | -0.24 | 0.36  | 0.28  | -0.19 |
| DLG1  | 8.14E-01 | 9.34E-01 |  | -2.47 | 1.73  | -0.66 | -0.28 | -0.14 | 0.38  | 0.66  | 0.52  | -0.79 | 0.52  | 0.77  | -6.34 | 0.18  | 1.15  | -3.01 | -0.75 | -0.25 | 0.30  | 0.34  | -2.14 | -1.02 | -0.65 | -0.98 | -0.45 |
| GLUC  | 8.22E-01 | 9.34E-01 |  | 6.52  | 6.05  | 7.95  | 4.04  | NA    | 7.32  | 8.92  | 5.75  | 7.35  | NA    | 0.88  | 7.57  | 7.22  | 5.95  | 0.04  | 7.97  | 5.82  | 2.71  | 5.56  | 6.11  | 6.32  | 3.94  | 6.83  | 3.26  |
| KPYM  | 8.12E-01 | 9.34E-01 |  | -0.01 | -0.13 | -0.07 | -0.50 | -0.09 | -0.08 | -0.47 | -0.02 | -0.40 | 0.19  | -0.08 | -0.08 | 0.07  | -0.62 | 0.06  | 0.03  | 0.12  | -0.30 | -0.05 | 0.06  | 0.03  | 0.04  | 0.06  | -0.06 |
| MK03  | 8.24E-01 | 9.34E-01 |  | -0.12 | -0.16 | -0.57 | -0.57 | -0.57 | -0.15 | -0.75 | -0.40 | -0.43 | -0.26 | -0.35 | -0.71 | -0.80 | -0.47 | -0.02 | -0.39 | -0.33 | -0.28 | -0.21 | -0.41 | 0.06  | -0.12 | -0.43 | -0.57 |
| NCAN  | 8.07E-01 | 9.34E-01 |  | 0.70  | 1.79  | -0.63 | 0.59  | 1.92  | 0.65  | 1.23  | 1.00  | 0.94  | 0.27  | 1.37  | 1.06  | 0.67  | 0.62  | 0.98  | 0.52  | -0.03 | 0.95  | 1.18  | 0.98  | 2.27  | 0.24  | 0.73  | 0.87  |
| PYC   | 8.19E-01 | 9.34E-01 |  | -0.24 | 0.04  | 0.69  | -0.30 | -0.16 | 0.04  | -0.71 | 0.19  | -0.33 | 0.03  | 0.03  | -0.01 | 0.29  | -0.73 | -0.59 | -0.34 | -0.47 | 1.77  | -1.08 | -0.13 | -0.61 | 1.20  | 0.18  | 0.48  |
| SC6A1 | 8.27E-01 | 9.34E-01 |  | 0.03  | -0.34 | -0.20 | -1.32 | -0.08 | -0.26 | -1.80 | 0.06  | -1.21 | -0.08 | -0.71 | -0.55 | -0.09 | -1.91 | -0.48 | 0.40  | 0.24  | -1.12 | 0.48  | -0.07 | 0.57  | -0.03 | 0.11  | -0.89 |
| SHAN2 | 8.30E-01 | 9.34E-01 |  | -2.96 | -3.00 | -0.77 | -0.89 | -1.86 | -0.61 | -2.82 | 0.35  | -0.31 | -6.42 | -2.41 | -1.46 | -2.48 | -0.62 | -2.90 | -1.21 | -3.51 | -1.83 | NA    | -0.10 | -1.43 | -1.23 | -1.19 | -1.52 |
| PTPR2 | 8.36E-01 | 9.37E-01 |  | 0.32  | 0.53  | -0.41 | 0.20  | -0.21 | -0.31 | 0.54  | 1.45  | 0.85  | 0.33  | 0.51  | 0.26  | -0.14 | 0.46  | -0.36 | 0.05  | -0.30 | 0.02  | 1.38  | 0.02  | 0.39  | 0.57  | -0.19 | -0.06 |
| SPTB1 | 8.36E-01 | 9.37E-01 |  | 0.07  | 0.59  | 0.55  | -0.53 | -0.63 | -0.14 | -0.26 | 0.88  | -0.05 | -0.11 | -0.57 | 0.00  | -0.20 | -0.44 | -0.16 | 0.41  | -0.65 | -0.07 | 0.18  | -0.30 | -0.20 | -0.36 | 0.12  | 0.25  |
| RABE1 | 8.39E-01 | 9.37E-01 |  | 0.43  | 0.11  | -0.41 | -0.29 | -0.19 | 0.20  | -0.23 | -0.32 | 0.26  | 1.31  | -0.61 | 0.78  | 0.01  | 0.63  | 0.17  | 0.50  | 0.27  | 0.69  | 0.01  | -0.50 | -0.29 | -0.16 | 2.39  | 1.49  |
| RABE1 | 8.39E-01 | 9.37E-01 |  | 0.66  | -1.37 | -0.13 | -0.53 | -1.11 | 0.10  | -0.07 | -0.19 | -0.62 | -0.68 | -0.93 | -0.29 | -1.54 | 0.28  | -0.41 | -0.26 | 0.04  | 0.81  | -0.13 | -1.13 | 0.08  | -0.16 | -0.56 | -1.01 |
| VPS35 | 8.41E-01 | 9.37E-01 |  | -0.33 | -0.73 | 0.46  | 0.06  | 1.20  | -0.52 | 0.15  | -0.67 | 0.03  | -1.15 | -0.12 | -0.17 | -0.62 | 0.49  | -0.06 | 0.24  | -0.83 | -0.16 | -0.30 | -0.30 | 0.61  | 0.03  | -0.68 | -0.59 |
| AP2A1 | 8.46E-01 | 9.37E-01 |  | -0.21 | -0.22 | 0.83  | 0.55  | -0.15 | 0.02  | 0.18  | 0.17  | 0.42  | -0.19 | -0.32 | 0.14  | 0.33  | 0.43  | -0.61 | -0.06 | -0.04 | 0.00  | 0.45  | 0.77  | 0.15  | 0.14  | 0.38  | -0.26 |
| ATPO  | 8.46E-01 | 9.37E-01 |  | -0.46 | -0.26 | 0.14  | -0.10 | -0.89 | -0.28 | -0.03 | -0.14 | 0.19  | -0.26 | -0.18 | -0.34 | -0.22 | 0.37  | -0.47 | -0.25 | -0.40 | 0.09  | -0.05 | -0.13 | -0.39 | 0.21  | -0.04 | -0.05 |
| CAP2  | 8.54E-01 | 9.39E-01 |  | 0.86  | 0.61  | 0.97  | 0.34  | 0.08  | 0.49  | 0.89  | -0.48 | 0.92  | 1.48  | 0.85  | 0.40  | -0.17 | 1.59  | 0.33  | 1.12  | -0.20 | 0.66  | 1.36  | 0.50  | 0.54  | -1.63 | 0.81  | 1.79  |
| CNTP1 | 8.53E-01 | 9.39E-01 |  | 0.64  | 0.16  | 0.49  | 0.92  | 0.25  | 0.39  | 0.56  | 0.31  | 0.52  | 0.51  | 0.27  | 0.22  | 0.33  | 0.52  | 0.94  | 0.12  | 0.65  | 0.55  | 0.27  | 0.36  | 0.33  | 0.58  | 0.29  | 1.14  |
| FLOT2 | 8.53E-01 | 9.39E-01 |  | -2.16 | -2.07 | -1.29 | -1.99 | -2.20 | -1.05 | -1.67 | -2.74 | -1.67 | -2.25 | -0.48 | -1.31 | -1.44 | -1.22 | -2.81 | -1.64 | -1.29 | -2.90 | -2.37 | -1.08 | -1.63 | -2.44 | -0.55 | -1.27 |
| KPCE  | 8.57E-01 | 9.39E-01 |  | -0.84 | -0.38 | -0.14 | -0.50 | -0.50 | -0.50 | -0.23 | -0.24 | -0.37 | -0.62 | -0.09 | -0.50 | -0.10 | -0.46 | -0.40 | -0.24 | -0.40 | -0.24 | -0.53 | -0.45 | 0.14  | -0.35 | -0.49 | -0.44 |
| C1TC  | 8.61E-01 | 9.41E-01 |  | 0.74  | -1.25 | 0.58  | -0.58 | -0.32 | -0.88 | -2.27 | 0.22  | 0.73  | -1.73 | -1.54 | -0.25 | -0.08 | -2.96 | 0.44  | 0.86  | -0.15 | -1.91 | -1.69 | -0.59 | -0.92 | -0.04 | 0.27  | -0.90 |
| GLNA  | 8.72E-01 | 9.50E-01 |  | -0.15 | 0.04  | -0.01 | -1.44 | -0.13 | -0.14 | -1.59 | 0.00  | -1.33 | -0.23 | -0.17 | -0.27 | 0.00  | -1.47 | 0.19  | 0.05  | 0.06  | -0.96 | -0.12 | 0.07  | 0.16  | 0.37  | 0.11  | -0.58 |
| GPDM  | 8.74E-01 | 9.50E-01 |  | 0.23  | -0.09 | 0.34  | 0.47  | 0.66  | -0.20 | 0.35  | -0.17 | 0.12  | 0.55  | 0.61  | 0.19  | -0.39 | 0.47  | 0.48  | 0.68  | -0.48 | 0.23  | 0.72  | 0.63  | 0.93  | 0.56  | 0.34  | 0.16  |
| ADDB  | 8.80E-01 | 9.53E-01 |  | 0.71  | 0.22  | 0.82  | 0.36  | 0.51  | 0.73  | -0.02 | 0.62  | 0.12  | 0.39  | 0.60  | 0.15  | 0.91  | 0.08  | 0.58  | 0.83  | 0.48  | 0.39  | 0.34  | 0.69  | 1.18  | 0.06  | 0.35  | -0.09 |
| COR1A | 8.81E-01 | 9.53E-01 |  | -0.46 | -0.76 | -0.37 | -0.14 | -0.54 | -0.26 | -0.20 | -0.41 | -0.02 | -0.61 | -0.55 | 0.33  | 0.07  | 0.43  | -0.62 | -0.56 | -0.67 | 0.08  | 0.08  | -0.41 | 0.22  | -0.05 | -0.41 | -0.47 |
| CKAP4 | 8.92E-01 | 9.62E-01 |  | 0.21  | -0.53 | -0.13 | -0.68 | -0.14 | -0.21 | -0.18 | -0.75 | -0.11 | -0.01 | -0.31 | -0.24 | -0.37 | -0.16 | -0.01 | -0.43 | 0.07  | -0.19 | -0.41 | -0.47 | 0.20  | -0.17 | -0.39 | -0.11 |
| SEPT3 | 9.01E-01 | 9.66E-01 |  | -0.02 | 0.01  | -0.18 | 0.05  | -0.32 | -0.29 | 0.38  | 0.02  | 0.28  | -0.27 | 0.26  | -0.15 | 0.03  | 0.14  | -0.51 | -0.21 | 0.01  | 0.33  | 0.03  | -0.19 | -0.34 | -0.07 | 0.11  | -0.02 |
| DYN1  | 9.05E-01 | 9.66E-01 |  | -0.07 | 0.15  | -0.25 | -0.45 | 0.50  | 0.44  | -0.53 | 0.02  | -0.30 | -0.29 | 0.68  | 0.24  | 0.35  | -0.89 | 0.08  | 0.71  | 0.24  | -0.57 | 0.19  | 0.38  | 0.64  | 0.19  | 0.24  | -0.13 |
| OGDHL | 9.05E-01 | 9.66E-01 |  | 1.06  | 0.55  | 0.82  | 0.12  | 0.77  | 0.63  | 0.74  | 0.79  | 0.39  | 0.61  | 0.91  | 1.19  | 0.24  | 0.32  | 1.02  | 1.02  | 0.91  | 1.15  | 0.96  | 0.30  | 0.98  | 1.10  | 0.60  | 0.74  |
| PP1A  | 9.01E-01 | 9.66E-01 |  | 0.04  | 0.19  | -0.10 | -0.87 | -0.01 | 0.07  | -1.20 | -0.08 | -0.89 | 0.07  | 0.06  | -0.04 | 0.09  | -0.80 | -0.09 | -0.12 | 0.10  | -0.75 | 0.32  | 0.12  | 0.40  | 0.22  | 0.06  | -0.46 |
| AOFB  | 9.16E-01 | 9.69E-01 |  | 0.79  | 0.47  | 0.46  | -0.20 | 0.74  | -0.21 | 0.73  | -0.43 | 0.09  | 0.61  | 0.05  | 0.34  | -0.49 | -1.18 | 0.65  | 0.79  | 1.03  | 0.55  | -1.03 | 0.20  | -1.06 | -0.02 | 1.23  | -0.67 |
| BAIP2 | 9.17E-01 | 9.69E-01 |  | 0.19  | 0.11  | 0.86  | 0.00  | 0.46  | 0.24  | -0.29 | 0.36  | 0.22  | 0.47  | 0.03  | 0.42  | 0.89  | -0.37 | 0.21  | 0.81  | 0.17  | -0.08 | 0.48  | 0.11  | 0.65  | 0.36  | 0.06  | 0.53  |
| CUL3  | 9.13E-01 | 9.69E-01 |  | 0.01  | 0.93  | 0.56  | 0.45  | 0.38  | -0.06 | 0.32  | 0.81  | 0.30  | 0.78  | 0.14  | 0.35  | -0.28 | -0.10 | 0.31  | 0.91  | 0.02  | 0.76  | 0.61  | -0.03 | 0.44  | 0.44  | 0.17  | -0.05 |
| MARK1 | 9.16E-01 | 9.69E-01 |  | -0.13 | -0.67 | -0.46 | 0.26  | -1.89 | -0.26 | 0.39  | 0.04  | 0.32  | -0.70 | -0.82 | -0.54 | -0.23 | -0.22 | -0.83 | -0.90 | -0.31 | -0.25 | -0.81 | -0.76 | -0.30 | 0.00  | -0.12 | -0.41 |
| GRM3  | 9.25E-01 | 9.71E-01 |  | 1.01  | 1.93  | 0.79  | 1.63  | 1.19  | 1.02  | 1.10  | 0.88  | 1.35  | 1.22  | 1.24  | 0.41  | 1.30  | 1.69  | 0.73  | 0.71  | 1.02  | 1.35  | 1.25  | 0.98  | 1.94  | 1.06  | 0.75  | 0.91  |
| IP3KA | 9.26E-01 | 9.71E-01 |  | 0.58  | -0.01 | -0.24 | 1.37  | -0.43 | 0.88  | 0.84  | 0.09  | 0.72  | 0.14  | 0.94  | 0.57  | 0.53  | 1.42  | 0.37  | 0.10  | 0.02  | 0.20  | 0.88  | 0.35  | 0.37  | -0.03 | 0.80  | -0.03 |
| TEBP  | 9.23E-01 | 9.71E-01 |  | -0.07 | -0.23 | 0.20  | -0.77 | 0.43  | 0.26  | -0.67 | -0.33 | -0.62 | -0.20 | -0.17 | -0.74 | -0.27 | -0.69 | -0.16 | 0.52  | 0.07  | -1.44 | -0.06 | 0.43  | -0.23 | 0.10  | -0.02 | -0.30 |

|       |          |          |  |       |       |       |       |       |       |       |       |       |       |       |       |       |       |       |       |       |       |       |       |       |       |       |       |
|-------|----------|----------|--|-------|-------|-------|-------|-------|-------|-------|-------|-------|-------|-------|-------|-------|-------|-------|-------|-------|-------|-------|-------|-------|-------|-------|-------|
| UBE2N | 9.29E-01 | 9.71E-01 |  | 0.31  | -0.05 | 0.44  | 0.71  | 0.47  | 0.27  | -0.21 | 0.62  | 0.17  | 0.22  | 0.56  | 0.73  | 0.25  | 0.59  | 0.71  | 0.19  | -0.05 | 0.58  | -0.35 | 0.66  | 0.28  | 0.18  | 0.60  | 0.40  |
| G6PI  | 9.44E-01 | 9.80E-01 |  | 0.01  | 0.12  | 0.15  | 0.50  | 0.25  | -0.01 | 0.30  | 0.12  | -0.05 | -0.05 | 0.42  | 0.44  | 0.10  | 0.44  | 0.37  | 0.28  | 0.59  | -0.20 | -0.08 | 0.27  | 0.20  | 0.27  | -0.05 | 0.69  |
| RAC1  | 9.44E-01 | 9.80E-01 |  | -0.07 | -0.07 | -0.08 | -0.87 | -0.10 | -0.16 | -0.86 | -0.16 | -0.66 | -0.08 | -0.15 | 0.14  | -0.06 | -1.07 | 0.14  | -0.04 | -0.18 | -0.68 | -0.11 | 0.07  | 0.21  | 0.05  | 0.04  | -0.50 |
| SND1  | 9.40E-01 | 9.80E-01 |  | -1.93 | 0.56  | -0.51 | -1.00 | 0.81  | -0.81 | -0.20 | -0.70 | -3.00 | -0.98 | -0.66 | 1.87  | -0.76 | -1.41 | -0.15 | -0.67 | -0.11 | -0.21 | -0.31 | -0.92 | -1.34 | -0.82 | -0.76 | -0.57 |
| COR1C | 9.59E-01 | 9.83E-01 |  | -0.78 | -0.29 | -1.09 | 0.26  | -0.72 | -0.77 | -0.15 | -0.85 | 0.01  | -0.76 | -0.60 | -0.40 | -0.50 | -0.13 | -0.73 | -0.66 | -0.61 | -0.52 | -0.41 | -0.71 | -0.47 | -0.16 | -0.09 | -0.91 |
| NRX3A | 9.50E-01 | 9.83E-01 |  | 0.23  | 0.04  | 0.12  | 0.51  | -1.26 | 0.55  | 0.84  | 0.93  | 0.03  | -0.10 | -0.24 | 1.02  | -0.31 | 0.64  | -0.18 | 0.57  | -0.99 | 0.06  | 0.72  | -0.26 | 0.18  | -0.41 | 0.59  | -0.36 |
| PDE2A | 9.57E-01 | 9.83E-01 |  | 0.13  | 0.68  | 1.16  | 0.60  | 1.30  | 0.78  | -0.44 | 0.60  | -0.05 | 0.16  | 0.88  | 1.36  | 0.63  | -0.29 | 0.50  | 0.38  | 0.00  | 0.10  | 0.57  | 1.97  | 0.68  | 0.05  | 1.51  | 0.64  |
| PSMD2 | 9.52E-01 | 9.83E-01 |  | -1.14 | -0.39 | 0.22  | -0.43 | -0.01 | 0.15  | 0.07  | -0.47 | -0.79 | -0.04 | -0.08 | -0.25 | 0.38  | 0.62  | -0.70 | -1.16 | 0.51  | -0.38 | -1.56 | -0.20 | 0.31  | -0.26 | -0.73 | -0.84 |
| RB39A | 9.57E-01 | 9.83E-01 |  | -0.15 | -0.71 | -0.60 | -0.24 | -0.77 | -0.70 | 0.32  | -0.73 | -0.02 | -0.41 | -0.56 | -0.28 | -0.65 | -0.36 | -0.23 | -0.84 | -0.48 | -0.05 | -0.38 | -0.52 | -0.31 | -0.78 | -0.57 | -0.06 |
| PSD11 | 9.64E-01 | 9.86E-01 |  | -0.35 | -0.23 | -0.51 | -0.64 | -1.23 | -0.31 | -0.48 | 0.03  | 0.02  | -0.61 | -0.25 | -0.53 | -0.49 | -0.33 | -0.30 | -1.03 | -0.90 | -0.39 | -0.25 | -0.44 | -0.63 | -0.56 | -0.52 | 0.20  |
| PRDX2 | 9.68E-01 | 9.87E-01 |  | -0.05 | 0.18  | 0.41  | -0.65 | 0.25  | 0.38  | -1.05 | 0.23  | -0.82 | 0.31  | 0.39  | 0.43  | 0.61  | -0.85 | 0.26  | 0.38  | 0.38  | -1.01 | 0.44  | 0.39  | 0.36  | 0.48  | 0.48  | -0.14 |
| ALDH2 | 9.81E-01 | 9.96E-01 |  | 0.40  | 0.00  | 0.21  | -0.09 | 0.29  | 0.20  | 0.21  | 0.12  | 0.27  | -0.12 | 0.43  | 0.56  | 0.51  | 0.45  | 0.46  | -0.16 | 0.44  | 0.41  | 0.08  | 0.16  | 0.34  | -0.84 | 0.55  | 1.34  |
| KAP2  | 9.81E-01 | 9.96E-01 |  | -0.08 | 0.65  | -0.26 | 0.43  | -0.18 | 0.56  | 0.38  | -0.33 | 0.27  | 0.11  | 0.26  | -0.68 | 0.12  | 0.17  | 0.04  | 0.93  | -0.76 | 0.74  | -0.50 | 1.29  | -0.07 | 0.97  | -0.03 | -0.12 |
| E41L1 | 9.90E-01 | 9.98E-01 |  | -0.72 | 0.44  | -0.05 | -1.53 | 0.54  | 0.64  | -1.76 | 0.09  | -1.87 | 0.48  | 0.09  | -0.44 | 0.27  | -1.90 | -0.46 | 0.50  | -0.44 | -0.55 | 0.54  | -0.36 | 0.50  | -0.29 | -0.43 | -0.62 |
| GRP75 | 9.93E-01 | 9.98E-01 |  | -0.12 | -0.75 | -0.22 | -0.12 | -0.30 | -0.60 | 0.11  | -0.53 | 0.79  | -1.26 | -0.79 | -0.23 | -0.28 | 0.39  | -0.36 | -0.70 | -0.61 | -0.02 | -0.40 | -0.38 | -0.04 | -0.30 | -0.54 | 0.12  |
| NFASC | 9.93E-01 | 9.98E-01 |  | 1.41  | 1.13  | 1.51  | 0.87  | 1.24  | 1.74  | 1.48  | 0.28  | 1.50  | 1.47  | 0.79  | 1.20  | 1.09  | 1.38  | 1.37  | 1.19  | 1.07  | 1.47  | 1.20  | 0.99  | 1.32  | 1.80  | 1.40  | 0.82  |
| RHOB  | 9.98E-01 | 9.98E-01 |  | 0.28  | 0.61  | 0.45  | -0.49 | 0.18  | 0.41  | -0.32 | 0.84  | -0.61 | 0.36  | 0.40  | 0.39  | 0.91  | -0.82 | 0.22  | 0.73  | 0.57  | -0.59 | 0.28  | 0.51  | 0.29  | 0.32  | 0.19  | -0.21 |
| XPOT  | 9.95E-01 | 9.98E-01 |  | 0.79  | 0.14  | 0.94  | 0.42  | 0.76  | 0.12  | 0.65  | 0.72  | 0.89  | 0.55  | 0.29  | 0.44  | 1.22  | 0.11  | 0.01  | 0.39  | 1.05  | 0.61  | 0.57  | 0.07  | 0.08  | 0.29  | 1.13  | 0.47  |
| CALM2 | 9.97E-01 | 9.98E-01 |  | -0.10 | -0.28 | 0.20  | 0.75  | -0.01 | 0.26  | 0.33  | 0.21  | 0.39  | 0.23  | 0.03  | -0.03 | -0.20 | 0.68  | 0.30  | -0.58 | -0.10 | 1.04  | -0.15 | -0.13 | 0.10  | -0.05 | 0.11  | 0.32  |

Reports the log2 homogenate protein levels for each sample as well as significance of the association between PMI and homogenate protein levels.

**eTable 4. Mouse Synaptosome PMI**

| Name  | pvalue   | qvalue   | Dropped From Human Analysis | 0     | 0     | 0     | 0     | 6     | 6     | 6     | 6     | 12    | 12    | 12    | 12    | 18    | 18    | 18    | 18    | 24    | 24    | 24    | 24    | 30    | 30    | 30    | 30    |
|-------|----------|----------|-----------------------------|-------|-------|-------|-------|-------|-------|-------|-------|-------|-------|-------|-------|-------|-------|-------|-------|-------|-------|-------|-------|-------|-------|-------|-------|
| HS12A | 4.46E-10 | 8.72E-08 | x                           | -0.99 | -0.84 | -0.42 | -0.88 | -0.58 | -0.53 | -0.68 | -0.72 | -0.11 | -0.19 | -0.27 | -0.20 | -0.18 | -0.12 | -0.30 | -0.29 | 0.66  | 0.51  | 0.23  | 0.43  | 0.46  | 0.56  | 0.33  | 0.61  |
| NSF   | 2.68E-08 | 2.62E-06 |                             | -0.10 | -0.02 | -0.15 | -0.08 | 0.73  | 0.64  | 0.57  | 0.57  | 0.73  | 0.68  | 0.76  | 0.91  | 0.64  | 0.48  | 0.58  | 0.36  | 0.57  | 0.93  | 0.80  | 0.98  | 0.54  | 0.79  | 0.83  | 0.88  |
| SEPT3 | 2.28E-07 | 1.79E-05 |                             | 0.56  | 0.50  | 0.66  | 0.52  | 0.52  | 0.54  | 0.41  | 0.80  | 0.29  | 0.42  | 0.43  | 0.48  | 0.25  | 0.23  | 0.26  | 0.27  | -0.06 | -0.18 | -0.01 | 0.05  | 0.09  | -0.13 | 0.16  | -0.15 |
| KPCA  | 4.87E-07 | 3.18E-05 | x                           | 0.03  | 0.62  | 0.69  | 0.47  | 0.85  | 0.88  | 0.60  | 0.88  | 0.71  | 0.95  | 0.75  | 0.83  | 0.60  | 0.83  | 1.16  | 0.90  | 1.50  | 1.53  | 1.34  | 1.77  | 1.43  | 1.58  | 1.90  | 1.86  |
| EAA2  | 1.48E-06 | 7.07E-05 |                             | 1.81  | 1.72  | 1.89  | 1.80  | 2.07  | 1.91  | 1.81  | 2.20  | 1.97  | 1.99  | 2.11  | 2.00  | 1.99  | 2.04  | 2.04  | 1.97  | 1.58  | 1.52  | 1.62  | 1.62  | 1.69  | 1.52  | 1.32  | 1.29  |
| VATE1 | 5.53E-06 | 1.64E-04 |                             | 0.40  | 0.40  | 0.50  | 0.39  | 0.84  | 0.68  | 0.61  | 0.81  | 0.58  | 0.82  | 0.88  | 0.91  | 0.77  | 0.65  | 0.79  | 0.64  | 0.91  | 0.83  | 0.87  | 1.05  | 0.99  | 0.95  | 1.01  | 0.85  |
| SRCN1 | 1.44E-05 | 2.96E-04 |                             | 0.88  | 1.45  | 0.75  | 0.91  | 0.96  | 0.96  | 0.81  | 0.54  | 0.44  | 0.87  | 0.36  | 0.98  | 0.50  | 0.60  | 0.62  | 0.68  | -0.12 | 0.46  | 0.37  | -0.04 | -0.03 | -0.33 | -0.17 | -0.16 |
| RUFY3 | 2.35E-05 | 4.38E-04 |                             | -0.66 | -0.99 | -0.34 | -0.64 | -0.18 | -0.14 | -0.16 | -0.32 | 0.20  | -0.10 | 0.03  | -0.11 | 0.08  | 0.13  | -0.02 | -0.40 | 0.10  | 0.58  | 0.17  | 0.28  | 0.05  | 0.41  | 0.23  | 0.24  |
| SEPT5 | 1.18E-04 | 1.44E-03 |                             | 0.68  | 0.72  | 0.89  | 0.88  | 0.79  | 0.70  | 0.66  | 1.11  | 0.65  | 0.66  | 0.65  | 0.94  | 0.55  | 0.54  | 0.59  | 0.59  | 0.36  | 0.21  | 0.43  | 0.38  | 0.47  | 0.42  | 0.56  | 0.37  |
| VAPA  | 1.36E-04 | 1.56E-03 |                             | 0.50  | 0.37  | 0.15  | 0.28  | 0.00  | 0.20  | 0.04  | -0.28 | -0.12 | -0.24 | -0.47 | -0.36 | 0.05  | -0.09 | 0.12  | -0.12 | -0.41 | -0.54 | -1.03 | -0.48 | 0.00  | -0.90 | -0.70 | -0.65 |
| GPDM  | 1.50E-04 | 1.68E-03 |                             | 0.89  | 0.88  | 0.80  | 0.94  | 1.11  | 0.96  | 1.04  | 0.92  | 1.07  | 1.03  | 1.02  | 0.81  | 1.03  | 0.82  | 1.13  | 1.13  | 0.64  | 0.96  | 0.82  | 0.78  | 0.26  | 0.44  | 0.62  | 0.69  |
| HOME1 | 2.03E-04 | 2.15E-03 |                             | 0.59  | 1.05  | 1.14  | 1.03  | 0.50  | 0.93  | 0.88  | 0.30  | 0.48  | -0.07 | 0.13  | 0.07  | 0.19  | 0.38  | 0.36  | 0.39  | -0.35 | -0.26 | -0.19 | -0.50 | 0.72  | -0.34 | -0.55 | -0.74 |
| SYN1  | 2.35E-04 | 2.24E-03 | x                           | 0.31  | 0.13  | 0.29  | 0.32  | 0.34  | 0.39  | 0.26  | 0.51  | 0.42  | 0.44  | 0.49  | 0.53  | 0.50  | 0.35  | 0.49  | 0.46  | 0.28  | -0.13 | 0.03  | -0.02 | 0.29  | -0.11 | 0.08  | -0.29 |
| KCC2A | 3.23E-04 | 2.69E-03 |                             | 0.72  | 1.02  | 1.19  | 1.10  | 0.42  | 0.78  | 0.60  | 0.44  | 1.03  | 0.83  | 0.71  | 0.68  | 0.60  | 0.68  | 0.90  | 0.32  | 1.14  | 1.37  | 0.81  | 1.19  | 1.15  | 1.21  | 1.20  | 1.31  |
| PRS6A | 3.39E-04 | 2.76E-03 |                             | -1.01 | -1.35 | -1.13 | -1.24 | -1.21 | -1.18 | -1.06 | -1.08 | -0.67 | -0.99 | -0.80 | -0.79 | -0.49 | -0.85 | -1.12 | -0.96 | -0.52 | -0.60 | -0.72 | -0.54 | -0.97 | -0.56 | -0.49 | -0.58 |
| AAKG2 | 8.30E-04 | 5.80E-03 |                             | -0.32 | -0.63 | 0.03  | -0.18 | -0.02 | -0.24 | -0.14 | -0.15 | 0.16  | 0.05  | 0.17  | 0.10  | 0.05  | 0.25  | -0.08 | 0.17  | 0.45  | 0.26  | 0.20  | 0.54  | 0.48  | 0.01  | 0.16  | 0.07  |
| C2C2L | 8.23E-04 | 5.80E-03 |                             | 0.48  | 0.48  | 0.28  | 0.50  | 0.67  | 0.73  | 0.56  | 0.78  | 0.84  | 0.69  | 0.83  | 0.78  | 0.82  | 0.75  | 0.77  | 0.85  | 0.57  | 0.95  | 0.94  | 1.08  | 0.70  | 0.78  | 1.01  | 0.90  |
| DYN2  | 8.19E-04 | 5.80E-03 |                             | -0.64 | -0.52 | -0.51 | -0.53 | -0.40 | -0.39 | -0.59 | -0.26 | -0.84 | -0.56 | -0.75 | -0.59 | -0.59 | -0.62 | -0.39 | -0.62 | -0.77 | -0.96 | -0.84 | -0.85 | -0.61 | -0.92 | -0.58 | -0.78 |
| KCC2B | 8.03E-04 | 5.80E-03 |                             | 0.56  | 0.88  | 0.70  | 0.82  | 0.23  | 0.51  | 0.48  | 0.26  | 0.80  | 0.56  | 0.49  | 0.53  | 0.36  | 0.44  | 0.59  | 0.24  | 0.63  | 0.86  | 0.57  | 0.72  | 0.71  | 0.75  | 0.85  | 0.98  |
| VATC1 | 1.24E-03 | 8.24E-03 |                             | 0.13  | 0.14  | -0.13 | 0.03  | 0.26  | 0.48  | 0.31  | 0.31  | 0.40  | 0.50  | 0.32  | 0.42  | 0.51  | 0.49  | 0.71  | 0.20  | 0.22  | 0.38  | 0.44  | 0.47  | 0.45  | 0.37  | 0.44  | 0.59  |



|       |          |          |   |       |       |       |       |       |       |       |       |       |       |       |       |       |       |       |       |       |       |       |       |       |       |       |       |
|-------|----------|----------|---|-------|-------|-------|-------|-------|-------|-------|-------|-------|-------|-------|-------|-------|-------|-------|-------|-------|-------|-------|-------|-------|-------|-------|-------|
| GNAQ  | 1.26E-03 | 8.24E-03 |   | 0.90  | 0.99  | 0.75  | 0.94  | 0.97  | 0.80  | 0.79  | 1.01  | 0.64  | 0.78  | 0.84  | 0.81  | 0.75  | 0.86  | 0.66  | 0.67  | 0.43  | 0.59  | 0.48  | 0.73  | 0.66  | 0.60  | 0.56  | 0.78  |
| IP3KA | 1.36E-03 | 8.63E-03 |   | -1.00 | -1.11 | -1.19 | -0.78 | -1.16 | -0.82 | -1.77 | -1.21 | -0.84 | -1.04 | -0.80 | -0.85 | -0.49 | -0.73 | -0.36 | -0.53 | -0.94 | -0.37 | -0.67 | -0.80 | -0.65 | -0.56 | -0.30 | -0.60 |
| PHB2  | 1.67E-03 | 9.88E-03 |   | 1.53  | 1.58  | 1.45  | 1.35  | 1.36  | 1.51  | 1.63  | 1.27  | 1.45  | 1.32  | 1.52  | 1.10  | 1.53  | 1.34  | 1.34  | 1.58  | 1.21  | 1.44  | 1.10  | 1.13  | 1.08  | 1.10  | 0.86  | 1.06  |
| CTNB1 | 1.72E-03 | 9.97E-03 |   | 0.61  | 0.81  | 0.04  | 0.76  | 0.38  | 0.40  | 0.31  | 0.09  | 0.41  | 0.22  | 0.07  | 0.24  | 0.55  | 0.36  | 0.36  | 0.34  | -0.36 | 0.07  | 0.19  | 0.03  | 0.03  | -0.38 | -0.56 | 0.01  |
| DLG4  | 1.73E-03 | 9.97E-03 |   | 0.52  | 0.87  | 0.91  | 1.04  | 0.25  | 0.68  | 0.57  | 0.15  | 0.70  | 0.05  | 0.17  | 0.28  | 0.29  | 0.36  | 0.04  | 0.23  | 0.29  | 0.10  | 0.11  | 0.04  | 0.43  | -0.04 | -0.18 | -0.43 |
| DMXL2 | 2.11E-03 | 1.15E-02 |   | -0.55 | -0.46 | -1.14 | -0.64 | -0.19 | -0.78 | -0.40 | -0.22 | -0.10 | -0.42 | 0.10  | -0.56 | -0.76 | -0.22 | -0.26 | 0.01  | -0.40 | 0.12  | 0.02  | 0.41  | -0.04 | 0.42  | 0.99  | 0.51  |
| UBP5  | 2.15E-03 | 1.15E-02 |   | -0.93 | -0.96 | -0.96 | -1.01 | -0.51 | -0.79 | -0.49 | -0.81 | -0.67 | -0.72 | -0.72 | -0.52 | -0.87 | -0.68 | -0.87 | -0.67 | -0.79 | -0.61 | -0.55 | -0.51 | -0.70 | -0.68 | -0.57 | -0.55 |
| VATA  | 2.29E-03 | 1.18E-02 |   | 0.21  | 0.23  | 0.07  | 0.24  | 0.67  | 0.68  | 0.46  | 0.74  | 0.47  | 0.85  | 0.76  | 0.79  | 0.68  | 0.28  | 0.69  | 0.43  | 0.45  | 0.73  | 0.77  | 0.93  | 0.48  | 0.67  | 1.04  | 0.79  |
| KPCE  | 2.37E-03 | 1.20E-02 |   | -0.69 | -0.74 | -0.97 | -0.68 | -0.58 | -0.75 | -0.53 | -0.52 | -0.12 | -0.42 | -0.24 | -0.26 | -0.35 | 0.04  | -0.36 | -0.42 | -0.56 | -0.03 | -0.22 | -0.13 | -0.59 | -0.20 | 0.04  | 0.11  |
| NRX1A | 2.52E-03 | 1.26E-02 |   | 1.13  | 1.03  | 0.98  | 0.97  | 1.17  | 0.97  | 0.98  | 0.98  | 0.70  | 0.80  | 1.01  | 1.07  | 1.11  | 0.76  | 0.62  | 0.80  | 0.41  | 0.76  | 0.77  | 0.74  | 0.45  | 0.70  | 0.63  | 0.66  |
| SEPT4 | 2.59E-03 | 1.28E-02 |   | 0.68  | 0.67  | 1.07  | 0.94  | 0.84  | 0.74  | 0.60  | 1.04  | 0.39  | 0.60  | 0.67  | 0.84  | 0.52  | 0.50  | 0.68  | 0.62  | 0.47  | 0.21  | 0.45  | 0.21  | 0.60  | 0.19  | 0.54  | 0.29  |
| CO3   | 3.20E-03 | 1.49E-02 |   | 1.74  | 1.56  | 1.58  | 1.51  | 1.64  | 1.71  | 1.80  | 1.66  | 1.77  | 1.83  | 1.66  | 1.60  | 1.66  | 1.40  | 1.54  | 1.80  | 1.55  | 1.59  | 1.54  | 1.33  | 1.00  | 1.52  | 1.23  | 1.36  |
| VATB2 | 3.34E-03 | 1.54E-02 |   | 0.24  | 0.15  | -0.27 | 0.04  | 0.61  | 0.46  | 0.34  | 0.48  | 0.29  | 0.59  | 0.66  | 0.72  | 0.61  | 0.32  | 0.50  | 0.29  | 0.16  | 0.68  | 0.65  | 0.77  | 0.50  | 0.67  | 0.91  | 0.69  |
| ANK2  | 4.00E-03 | 1.66E-02 |   | 0.33  | 0.64  | 0.49  | 0.52  | 0.09  | 0.37  | 0.22  | 0.47  | 0.15  | 0.19  | 0.14  | 0.27  | 0.18  | 0.05  | 0.20  | 0.17  | 0.27  | 0.03  | 0.26  | 0.15  | 0.35  | 0.08  | -0.02 | 0.05  |
| ATPA  | 3.85E-03 | 1.66E-02 |   | 1.38  | 1.42  | 1.09  | 1.25  | 1.07  | 1.30  | 1.48  | 1.13  | 1.41  | 1.20  | 1.16  | 0.88  | 1.08  | 0.96  | 1.09  | 1.44  | 0.75  | 1.21  | 0.97  | 0.83  | 0.53  | 0.83  | 0.68  | 0.84  |
| EGFR  | 3.93E-03 | 1.66E-02 |   | 0.39  | 0.39  | 0.31  | 0.26  | 0.16  | 0.32  | 0.49  | 0.12  | 0.40  | 0.30  | 0.30  | 0.08  | 0.31  | 0.29  | 0.18  | 0.45  | 0.28  | 0.19  | -0.06 | -0.13 | -0.03 | 0.10  | -0.32 | -0.13 |
| VATH  | 3.84E-03 | 1.66E-02 |   | 0.25  | 0.22  | 0.04  | 0.33  | 0.55  | 0.64  | 0.37  | 0.68  | 0.54  | 0.75  | 0.71  | 0.80  | 0.63  | 0.35  | 0.60  | 0.33  | 0.35  | 0.73  | 0.72  | 0.99  | 0.50  | 0.64  | 0.96  | 0.83  |
| NDUV1 | 4.28E-03 | 1.76E-02 |   | 1.49  | 1.50  | 1.40  | 1.38  | 1.24  | 1.43  | 1.62  | 1.34  | 1.50  | 1.38  | 1.52  | 1.05  | 1.28  | 1.08  | 1.23  | 1.60  | 1.09  | 1.29  | 1.18  | 1.05  | 0.91  | 1.10  | 0.77  | 1.02  |
| VDAC1 | 4.49E-03 | 1.83E-02 |   | 1.67  | 1.62  | 1.48  | 1.50  | 1.50  | 1.67  | 1.75  | 1.55  | 1.70  | 1.64  | 1.56  | 1.37  | 1.54  | 1.36  | 1.54  | 1.66  | 1.13  | 1.58  | 1.36  | 1.33  | 0.84  | 1.33  | 1.17  | 1.32  |
| MPCP  | 4.58E-03 | 1.85E-02 |   | 1.58  | 1.57  | 1.49  | 1.54  | 1.39  | 1.56  | 1.78  | 1.27  | 1.61  | 1.57  | 1.45  | 1.18  | 1.37  | 1.22  | 1.47  | 1.59  | 1.11  | 1.42  | 1.20  | 1.08  | 0.82  | 1.20  | 0.95  | 1.23  |
| NBEA  | 5.25E-03 | 2.05E-02 |   | -0.47 | -0.33 | -0.78 | -0.13 | -0.52 | -0.34 | -0.09 | -0.45 | 0.12  | -0.39 | -0.24 | -0.02 | 0.15  | -0.19 | -0.36 | -0.14 | -0.38 | 0.28  | 0.17  | 0.31  | 0.07  | 0.23  | 0.60  | 0.31  |
| ANK1  | 5.33E-03 | 2.06E-02 |   | 0.43  | 0.75  | 0.87  | 0.68  | 0.30  | 0.40  | 0.20  | 0.43  | 0.31  | 0.55  | 0.54  | 0.56  | 0.46  | 0.29  | 0.38  | 0.42  | 0.71  | 0.53  | 0.47  | 0.62  | 1.00  | 0.57  | 0.64  | 0.63  |
| NLGN2 | 6.58E-03 | 2.47E-02 |   | 1.03  | 1.32  | 0.80  | 1.13  | 0.95  | 1.00  | 0.73  | 0.81  | 1.07  | 0.94  | 0.45  | 0.61  | 0.78  | 0.53  | 0.79  | 0.39  | -0.25 | 0.61  | 0.67  | 0.54  | 0.52  | 0.32  | -0.06 | 0.43  |
| CKAP4 | 6.93E-03 | 2.58E-02 |   | 1.27  | 1.41  | 1.07  | 1.23  | 1.06  | 1.35  | 1.54  | 1.25  | 1.39  | 1.28  | 1.16  | 0.84  | 1.14  | 0.91  | 1.19  | 1.47  | 0.88  | 1.23  | 0.90  | 0.67  | 0.47  | 0.82  | 0.71  | 0.88  |
| CNTN1 | 8.23E-03 | 2.93E-02 |   | 0.99  | 0.97  | 1.18  | 0.98  | 1.10  | 1.01  | 0.83  | 0.92  | 0.84  | 0.92  | 1.12  | 1.21  | 1.14  | 1.09  | 1.02  | 0.91  | 1.44  | 1.14  | 1.20  | 1.22  | 1.36  | 1.30  | 1.27  | 1.13  |
| RP3A  | 8.18E-03 | 2.93E-02 |   | 0.37  | 0.41  | 0.35  | 0.25  | 0.44  | 0.61  | 0.48  | 0.41  | 0.32  | 0.35  | 0.54  | 0.21  | 0.32  | 0.51  | 0.57  | 0.37  | 0.28  | -0.26 | 0.13  | 0.22  | 0.31  | 0.25  | 0.12  | -0.04 |
| VDAC3 | 8.32E-03 | 2.93E-02 |   | 1.79  | 1.74  | 1.60  | 1.60  | 1.63  | 1.72  | 1.88  | 1.68  | 1.74  | 1.72  | 1.69  | 1.42  | 1.61  | 1.42  | 1.69  | 1.80  | 1.46  | 1.69  | 1.47  | 1.38  | 1.26  | 1.48  | 1.27  | 1.44  |
| KAD4  | 8.46E-03 | 2.95E-02 |   | 0.31  | 0.38  | 0.47  | 0.36  | 0.09  | 0.67  | -0.08 | 0.37  | -0.16 | 0.39  | 0.02  | 0.12  | -0.16 | -0.49 | -0.26 | 0.20  | 0.02  | -0.36 | -0.22 | -0.48 | -0.56 | 0.03  | -0.10 | 0.02  |
| 2A5D  | 8.73E-03 | 2.97E-02 | x | -0.71 | -0.53 | -0.39 | -0.63 | -0.72 | -0.65 | -0.72 | -0.59 | -0.72 | -1.08 | -0.54 | -0.79 | -1.01 | -1.04 | -0.71 | -0.83 | -0.22 | -0.43 | -0.64 | -0.60 | -0.16 | -0.41 | -0.19 | -0.74 |
| CMC1  | 9.25E-03 | 3.12E-02 |   | 1.76  | 1.75  | 1.61  | 1.70  | 1.58  | 1.73  | 1.89  | 1.76  | 1.86  | 1.69  | 1.68  | 1.39  | 1.59  | 1.42  | 1.66  | 1.87  | 1.24  | 1.68  | 1.50  | 1.41  | 0.98  | 1.40  | 1.38  | 1.38  |
| GRIA2 | 1.09E-02 | 3.62E-02 |   | 1.18  | 1.37  | 1.09  | 1.13  | 1.23  | 1.35  | 1.11  | 1.12  | 1.39  | 1.35  | 1.48  | 1.25  | 1.31  | 1.28  | 1.36  | 1.24  | 1.15  | 1.59  | 1.56  | 1.45  | 1.52  | 1.49  | 1.43  | 1.46  |
| SDHB  | 1.24E-02 | 3.94E-02 |   | 1.40  | 1.32  | 1.00  | 1.31  | 1.09  | 1.29  | 1.35  | 0.97  | 1.27  | 1.14  | 1.12  | 0.93  | 1.09  | 0.84  | 0.97  | 1.28  | 0.60  | 1.23  | 0.88  | 0.87  | 0.34  | 0.72  | 0.64  | 1.02  |
| SRC   | 1.26E-02 | 3.98E-02 |   | 0.42  | 0.28  | 0.26  | 0.43  | 0.28  | 0.31  | 0.42  | 0.06  | 0.47  | 0.42  | 0.22  | 0.41  | 0.19  | 0.68  | 0.09  | 0.28  | 0.01  | -0.05 | 0.00  | 0.24  | 0.03  | -0.07 | 0.14  | 0.06  |
| AT1A1 | 1.30E-02 | 4.05E-02 |   | 0.99  | 1.10  | 1.08  | 0.91  | 1.27  | 1.17  | 1.00  | 1.05  | 1.04  | 1.13  | 1.29  | 1.42  | 1.36  | 1.21  | 1.24  | 1.06  | 1.26  | 1.25  | 1.45  | 1.43  | 1.54  | 1.19  | 1.35  | 1.31  |
| ADT1  | 1.44E-02 | 4.39E-02 |   | 1.63  | 1.65  | 1.50  | 1.44  | 1.38  | 1.56  | 1.77  | 1.41  | 1.69  | 1.51  | 1.53  | 1.19  | 1.44  | 1.32  | 1.50  | 1.77  | 1.19  | 1.56  | 1.29  | 1.24  | 0.84  | 1.22  | 1.04  | 1.29  |
| SPTB1 | 1.46E-02 | 4.42E-02 |   | -0.03 | 0.39  | 0.38  | 0.11  | -0.47 | -0.20 | -0.10 | -0.54 | -0.10 | -0.08 | -0.38 | -0.30 | 0.00  | -0.30 | -0.37 | -0.28 | -0.12 | -0.26 | -0.44 | -0.34 | 0.14  | -0.37 | -0.43 | -0.61 |
| CNTP1 | 1.53E-02 | 4.58E-02 |   | 0.32  | 0.35  | 0.41  | 0.44  | 0.27  | 0.40  | 0.30  | 0.40  | 0.06  | 0.46  | 0.17  | 0.43  | 0.38  | 0.44  | 0.47  | 0.18  | 0.63  | 0.34  | 0.49  | 0.42  | 0.87  | 0.54  | 0.96  | 0.44  |
| VAPB  | 1.53E-02 | 4.58E-02 |   | 0.25  | 0.51  | 0.70  | 0.09  | 0.10  | 0.44  | 0.08  | 0.51  | 0.01  | 0.22  | -0.59 | 0.16  | -0.10 | 0.41  | -0.68 | 0.04  | 0.35  | -0.04 | -1.40 | -1.21 | -0.23 | -0.74 | -1.16 | -1.13 |
| PTPRS | 1.56E-02 | 4.62E-02 |   | 1.76  | 1.57  | 1.39  | 1.42  | 1.48  | 1.57  | 1.72  | 1.50  | 1.75  | 1.55  | 1.60  | 1.33  | 1.56  | 1.36  | 1.61  | 1.67  | 1.18  | 1.59  | 1.39  | 1.42  | 0.80  | 1.32  | 1.16  | 1.30  |
| ATLA1 | 1.70E-02 | 4.89E-02 |   | -0.03 | -0.04 | 0.46  | 0.13  | -0.14 | -0.18 | -0.02 | 0.41  | 0.35  | 0.34  | 0.48  | 0.39  | 0.26  | 0.20  | -0.11 | 0.15  | 0.89  | 0.20  | 0.38  | 0.43  | 0.80  | 0.76  | 0.29  | 0.37  |
| VATD  | 1.70E-02 | 4.89E-02 |   | 0.33  | 0.36  | 0.19  | 0.25  | 0.86  | 0.70  | 0.49  | 0.77  | 0.48  | 0.98  | 0.84  | 0.91  | 0.88  | 0.46  | 0.88  | 0.58  | 0.49  | 0.79  | 1.04  | 1.08  | 0.39  | 0.88  | 1.01  | 0.85  |
| GBRA1 | 2.39E-02 | 6.63E-02 |   | 1.24  | 1.43  | 1.31  | 1.30  | 1.30  | 1.70  | 1.57  | 1.71  | 1.18  | 1.30  | 1.52  | 1.33  | 1.67  | 1.36  | 1.11  | 1.34  | 0.95  | 1.03  | 1.05  | 1.17  | 1.44  | 1.44  | 0.88  | 1.35  |
| BAIP2 | 2.68E-02 | 7.34E-02 |   | 0.74  | 0.97  | 0.63  | 0.83  | 0.67  | 0.74  | 0.81  | 0.98  | 0.88  | 0.30  | 0.53  | 0.50  | 0.59  | 1.16  | 0.50  | 0.79  | 0.12  | 0.73  | 0.47  | 0.31  | 0.10  | 0.18  | 0.48  | 0.59  |
| GHC1  | 2.77E-02 | 7.51E-02 |   | 1.43  | 1.45  | 1.00  | 1.25  | 1.48  | 1.27  | 1.37  | 0.96  | 1.55  | 1.29  | 1.03  | 0.91  | 1.38  | 1.30  | 1.05  | 1.47  | 0.28  | 1.09  | 1.27  | 0.84  | 0.27  | 0.96  | 0.83  | 0.72  |

|       |          |          |  |       |       |       |       |       |       |       |       |       |       |       |       |       |       |       |       |       |       |       |       |       |       |       |       |
|-------|----------|----------|--|-------|-------|-------|-------|-------|-------|-------|-------|-------|-------|-------|-------|-------|-------|-------|-------|-------|-------|-------|-------|-------|-------|-------|-------|
| NOS1  | 3.77E-02 | 9.90E-02 |  | -0.16 | -0.16 | 0.04  | -0.34 | -0.38 | -0.32 | 0.00  | -0.66 | -0.17 | -1.22 | -1.13 | -0.69 | -0.32 | -0.56 | -0.63 | -0.89 | -0.15 | -1.64 | -1.67 | -0.88 | -0.42 | -1.00 | -1.96 | -1.33 |
| OGDHL | 3.80E-02 | 9.90E-02 |  | 1.05  | 0.74  | 0.81  | 0.92  | 0.58  | 0.76  | 1.05  | 0.36  | 0.80  | 0.54  | 0.53  | 0.49  | 0.73  | 0.37  | 1.01  | 1.06  | 0.69  | 0.81  | 0.68  | 0.42  | 0.14  | 0.53  | 0.20  | 0.45  |
| GBRB3 | 4.11E-02 | 1.06E-01 |  | 1.19  | 1.29  | 1.46  | 1.28  | 1.60  | 1.16  | 1.47  | 1.46  | 1.36  | 1.57  | 1.42  | 1.50  | 1.57  | 1.41  | 1.73  | 1.20  | 2.02  | 1.55  | 1.66  | 1.63  | 1.63  | 2.56  | 1.58  | 1.74  |
| SC6A1 | 4.41E-02 | 1.12E-01 |  | 0.99  | 0.89  | 0.79  | 0.97  | 1.14  | 1.15  | 1.25  | 1.16  | 1.07  | 1.19  | 1.13  | 1.24  | 1.18  | 1.12  | 1.17  | 0.93  | 0.87  | 1.31  | 1.12  | 1.25  | 1.13  | 1.15  | 1.05  | 1.32  |
| MARE2 | 4.52E-02 | 1.13E-01 |  | -1.22 | -1.09 | -0.14 | -1.08 | -0.89 | -0.86 | -0.86 | -0.88 | -0.50 | -0.91 | -0.83 | -0.78 | -0.67 | -0.43 | -0.50 | -0.51 | 0.50  | -0.34 | -0.67 | -0.60 | 0.26  | -0.10 | -0.59 | -0.47 |
| CACB4 | 4.60E-02 | 1.14E-01 |  | 0.76  | 1.03  | 0.80  | 0.99  | 0.91  | 0.99  | 0.78  | 1.20  | 1.14  | 1.18  | 1.19  | 1.10  | 1.03  | 0.82  | 0.98  | 0.75  | 0.75  | 1.21  | 1.26  | 1.37  | 1.14  | 1.18  | 1.29  | 1.09  |
| BDH   | 5.81E-02 | 1.39E-01 |  | 0.51  | 0.56  | -0.12 | 0.28  | 0.10  | 0.24  | 0.58  | -0.15 | 0.49  | -0.04 | 0.22  | -0.15 | 0.30  | 0.32  | 0.27  | 0.42  | -0.80 | 0.42  | 0.27  | -0.09 | -1.02 | -0.24 | -0.47 | -0.03 |
| GDAP1 | 5.88E-02 | 1.40E-01 |  | 1.72  | 1.57  | 1.42  | 1.76  | 1.64  | 1.68  | 1.53  | 1.39  | 1.66  | 2.00  | 1.69  | 1.59  | 1.34  | 1.51  | 1.30  | 1.68  | 1.35  | 1.46  | 1.62  | 0.73  | 1.26  | 1.50  | 0.88  | 1.36  |
| ANK3  | 6.26E-02 | 1.47E-01 |  | -0.85 | -1.38 | -1.22 | -1.64 | -1.17 | -1.03 | -0.97 | -1.32 | -0.77 | -1.30 | -0.56 | -0.95 | -0.79 | -0.77 | -1.04 | -0.98 | -1.58 | -1.24 | -1.08 | -1.35 | -0.94 | -0.90 | -0.95 | -1.19 |
| NAC1  | 6.35E-02 | 1.48E-01 |  | 0.92  | 1.37  | 1.00  | 1.19  | 1.38  | 1.09  | 1.15  | 1.24  | 1.04  | 1.37  | 1.37  | 1.41  | 1.15  | 1.07  | 1.62  | 0.87  | 1.19  | 1.24  | 1.33  | 1.47  | 1.63  | 1.36  | 1.85  | 1.49  |
| AP2M1 | 6.48E-02 | 1.50E-01 |  | 0.10  | 0.16  | -0.08 | 0.10  | 0.07  | 0.11  | -0.01 | 0.41  | 0.09  | 0.36  | 0.26  | 0.46  | 0.23  | -0.06 | 0.16  | 0.08  | 0.13  | 0.23  | 0.40  | 0.52  | 0.18  | 0.44  | 0.70  | 0.28  |
| 4F2   | 6.77E-02 | 1.51E-01 |  | 1.34  | 1.34  | 1.58  | 1.32  | 1.54  | 1.38  | 1.35  | 1.53  | 1.29  | 1.52  | 1.55  | 1.61  | 1.58  | 1.36  | 1.51  | 1.37  | 2.07  | 1.55  | 1.50  | 1.62  | 1.48  | 2.04  | 1.78  | 1.62  |
| NFASC | 6.76E-02 | 1.51E-01 |  | 1.02  | 1.11  | 1.44  | 1.21  | 1.17  | 1.20  | 0.98  | 1.27  | 0.87  | 1.22  | 1.28  | 1.47  | 1.60  | 1.36  | 1.12  | 1.03  | 1.46  | 1.25  | 1.65  | 1.34  | 1.66  | 1.55  | 1.52  | 1.42  |
| CKAP5 | 7.53E-02 | 1.63E-01 |  | 0.82  | 0.32  | 0.03  | 0.18  | 0.96  | 0.34  | 0.60  | 0.80  | 0.37  | 0.41  | 0.53  | 0.46  | 0.74  | 1.16  | 0.62  | 0.72  | 0.16  | 0.53  | 0.39  | 0.67  | 0.72  | 0.66  | 1.15  | 0.48  |
| CXA1  | 7.51E-02 | 1.63E-01 |  | 1.92  | 1.27  | 1.63  | 1.58  | 1.99  | 1.70  | 1.80  | 1.46  | 2.71  | 1.80  | 1.86  | 1.58  | 2.32  | 1.96  | 2.24  | 1.78  | 1.97  | 2.13  | 1.59  | 1.56  | 1.73  | 2.45  | 2.70  | 2.44  |
| VDAC2 | 7.55E-02 | 1.63E-01 |  | 1.66  | 1.65  | 1.61  | 1.48  | 1.45  | 1.64  | 1.75  | 1.57  | 1.69  | 1.52  | 1.54  | 1.36  | 1.51  | 1.31  | 1.52  | 1.67  | 1.56  | 1.58  | 1.34  | 1.34  | 1.31  | 1.51  | 1.21  | 1.32  |
| GBRB1 | 7.70E-02 | 1.64E-01 |  | 1.55  | 1.59  | 1.42  | 1.59  | 1.61  | 1.56  | 1.34  | 1.28  | 1.40  | 1.57  | 1.51  | 1.22  | 1.44  | 1.26  | 1.71  | 1.46  | 1.52  | 1.53  | 1.63  | 1.53  | 1.63  | 2.22  | 1.64  | 1.66  |
| L1CAM | 7.93E-02 | 1.68E-01 |  | 0.63  | 1.04  | 0.62  | 0.82  | 0.74  | 0.61  | 0.58  | 0.68  | -0.06 | 0.35  | 0.53  | 0.49  | 0.72  | 0.32  | 1.06  | 0.64  | 0.46  | 0.43  | 0.55  | 0.41  | 0.55  | 0.63  | 0.80  | 0.28  |
| M2OM  | 8.48E-02 | 1.76E-01 |  | 1.60  | 1.54  | 1.25  | 1.46  | 1.35  | 1.51  | 1.78  | 1.48  | 1.55  | 1.48  | 1.46  | 1.16  | 1.45  | 1.26  | 1.13  | 1.69  | 1.26  | 1.45  | 1.21  | 1.16  | 0.85  | 1.35  | 0.92  | 1.34  |
| FLOT1 | 8.97E-02 | 1.81E-01 |  | 1.76  | 1.29  | 1.59  | 1.65  | 1.79  | 1.36  | 1.81  | 1.61  | 1.49  | 1.42  | 1.23  | 1.85  | 1.77  | 1.48  | 1.75  | 1.66  | 1.85  | 1.98  | 1.29  | 2.15  | 3.39  | 1.94  | 1.86  | 1.95  |
| SNP25 | 9.75E-02 | 1.94E-01 |  | 0.93  | 0.56  | 0.84  | 0.61  | 1.03  | 1.24  | 1.19  | 1.19  | 1.12  | 1.29  | 1.01  | 1.86  | 1.28  | 0.73  | 1.05  | 0.84  | 2.56  | 0.92  | 0.89  | 1.91  | 1.98  | 1.02  | 1.23  | 1.76  |
| DYN1  | 9.89E-02 | 1.94E-01 |  | -0.96 | -0.64 | -0.55 | -0.48 | -0.65 | -0.57 | -0.65 | -0.33 | -0.91 | -0.52 | -0.93 | -0.89 | -0.98 | -1.18 | -0.62 | -0.96 | -0.57 | -1.21 | -0.91 | -0.89 | -0.77 | -0.96 | -0.93 | -0.71 |
| HXK1  | 1.03E-01 | 1.99E-01 |  | 1.69  | 1.39  | 1.49  | 1.60  | 1.62  | 1.63  | 1.82  | 1.56  | 1.73  | 1.54  | 1.59  | 1.53  | 1.59  | 1.39  | 1.58  | 1.72  | 1.54  | 1.65  | 1.44  | 1.43  | 1.18  | 1.59  | 1.36  | 1.38  |
| NDUAA | 1.06E-01 | 2.04E-01 |  | 1.69  | 1.77  | 1.58  | 1.58  | 1.30  | 1.50  | 1.86  | 1.57  | 1.69  | 1.52  | 1.44  | 1.08  | 1.45  | 1.37  | 1.49  | 1.89  | 1.37  | 1.58  | 1.23  | 1.08  | 1.33  | 1.52  | 0.98  | 1.13  |
| GLPK  | 1.08E-01 | 2.06E-01 |  | 0.98  | 0.99  | 0.96  | 1.18  | 1.05  | 1.25  | 1.33  | 0.64  | 1.39  | 0.85  | 0.84  | 0.59  | 1.17  | 1.06  | 0.86  | 1.22  | 0.09  | 1.17  | 0.72  | 0.60  | 0.06  | 0.64  | 0.53  | 0.98  |
| NRX3A | 1.10E-01 | 2.10E-01 |  | 1.03  | 0.97  | 1.08  | 1.21  | 1.03  | 0.76  | 0.94  | 1.14  | 0.73  | 0.87  | 1.18  | 1.06  | 1.20  | 0.90  | 1.03  | 0.90  | -0.35 | 0.76  | 0.84  | 0.64  | 1.23  | 0.29  | 0.89  | 0.64  |
| KCC2D | 1.16E-01 | 2.16E-01 |  | 0.47  | 0.65  | 0.79  | 0.92  | 0.43  | 0.60  | 0.43  | 0.31  | 0.68  | 0.61  | 0.47  | 0.29  | 0.35  | 0.47  | 0.59  | 0.23  | 0.53  | 0.68  | 0.27  | 0.51  | 0.50  | 0.44  | 0.06  | 0.42  |
| CPNE6 | 1.20E-01 | 2.22E-01 |  | 0.82  | 0.65  | 0.52  | 0.65  | 0.90  | 0.66  | 0.93  | 1.04  | 0.62  | 0.92  | 1.23  | 0.76  | 0.73  | 1.15  | 1.05  | 0.76  | 0.84  | 1.05  | 1.13  | 1.16  | 0.93  | 0.72  | 0.88  | 0.84  |
| GRIA3 | 1.20E-01 | 2.22E-01 |  | 1.32  | 1.61  | 1.78  | 1.80  | 1.59  | 1.54  | 1.55  | 1.68  | 1.92  | 1.66  | 1.75  | 1.68  | 1.63  | 1.21  | 1.70  | 1.57  | 2.00  | 1.71  | 1.67  | 1.88  | 2.07  | 2.06  | 1.70  | 1.58  |
| CDK5  | 1.25E-01 | 2.27E-01 |  | -0.15 | -0.61 | -0.40 | -0.53 | -0.44 | -0.13 | -0.47 | -0.58 | -0.28 | -0.53 | -0.25 | -0.34 | -0.26 | -0.21 | -0.79 | -0.34 | -0.37 | -0.12 | -0.13 | -0.16 | 0.03  | 0.01  | -0.13 | -0.34 |
| ABR   | 1.36E-01 | 2.42E-01 |  | -0.64 | -1.03 | -0.33 | -0.49 | -0.30 | -0.59 | 0.09  | -0.35 | 0.05  | -0.28 | -0.89 | -0.08 | -0.50 | -0.13 | -0.25 | -0.83 | -0.21 | 0.10  | -0.28 | -0.43 | -0.08 | -0.02 | 0.01  | -0.07 |
| SV2A  | 1.41E-01 | 2.49E-01 |  | 0.63  | 0.46  | 0.62  | 0.68  | 0.95  | 0.78  | 0.64  | 0.83  | 0.65  | 0.98  | 0.57  | 0.93  | 0.75  | 0.51  | 0.75  | 0.34  | 0.49  | 0.86  | 0.68  | 0.92  | 0.86  | 0.77  | 0.80  | 0.98  |
| RTN1  | 1.52E-01 | 2.65E-01 |  | 0.42  | 0.36  | 0.31  | 0.39  | 0.38  | 0.42  | 0.35  | 0.55  | 0.32  | 0.71  | 0.60  | 0.70  | 0.53  | 0.10  | 0.59  | 0.37  | 0.50  | 0.34  | 0.44  | 0.68  | 0.64  | 0.58  | 0.70  | 0.48  |
| VPP1  | 1.53E-01 | 2.65E-01 |  | 1.04  | 1.00  | 1.05  | 1.00  | 1.28  | 1.34  | 1.02  | 1.33  | 1.03  | 1.30  | 1.31  | 1.39  | 1.21  | 0.97  | 1.31  | 1.17  | 0.89  | 1.27  | 1.28  | 1.52  | 1.24  | 1.33  | 1.70  | 1.25  |
| ADT3  | 1.57E-01 | 2.69E-01 |  | 1.27  | 1.13  | 1.37  | 1.09  | 0.87  | 1.13  | 1.44  | 0.75  | 1.27  | 1.10  | 0.86  | 0.77  | 0.96  | 0.92  | 1.23  | 1.13  | 1.07  | 1.17  | 0.67  | 0.73  | 0.80  | 0.93  | 0.33  | 0.92  |
| VGLU1 | 1.75E-01 | 2.92E-01 |  | 0.74  | 0.89  | 0.63  | 0.95  | 1.17  | 1.00  | 0.65  | 1.26  | 0.92  | 1.13  | 1.11  | 1.40  | 1.19  | 0.81  | 1.08  | 0.86  | 0.87  | 1.14  | 1.30  | 1.09  | 1.01  | 1.07  | 1.33  | 1.06  |
| RHG01 | 1.90E-01 | 3.08E-01 |  | -0.77 | -0.84 | -0.59 | -1.03 | -1.03 | -0.82 | -0.64 | -0.72 | -0.63 | -0.46 | -0.90 | -0.86 | -0.98 | -0.94 | -0.58 | -0.86 | -0.36 | -0.44 | -0.68 | -0.53 | -1.04 | -0.65 | -0.48 | -0.45 |
| SPTA1 | 1.92E-01 | 3.09E-01 |  | 0.58  | 0.59  | 0.26  | 0.14  | 0.88  | 0.61  | 0.50  | 0.39  | 0.71  | 0.24  | 0.67  | 0.62  | 0.81  | 0.98  | 0.48  | 0.94  | 0.23  | 0.56  | 0.59  | 0.68  | 0.84  | 0.83  | 0.36  | 0.66  |
| GNAZ  | 2.01E-01 | 3.16E-01 |  | 0.65  | 0.72  | 0.86  | 0.88  | 1.03  | 0.90  | 0.82  | 1.16  | 0.39  | 0.95  | 0.85  | 1.05  | 0.80  | 0.45  | 1.06  | 0.56  | 0.43  | 0.39  | 0.71  | 0.84  | 0.65  | 0.75  | 0.79  | 0.46  |
| NCAM2 | 2.17E-01 | 3.37E-01 |  | 0.89  | 0.89  | 1.13  | 0.91  | 0.97  | 1.00  | 0.89  | 1.23  | 0.55  | 0.98  | 1.01  | 0.94  | 0.97  | 0.90  | 1.08  | 0.81  | 1.37  | 1.01  | 1.06  | 1.16  | 1.74  | 1.10  | 1.10  | 0.88  |
| S4A4  | 2.23E-01 | 3.44E-01 |  | 1.19  | 1.02  | 0.58  | 1.02  | 1.44  | 1.15  | 1.45  | 1.17  | 1.29  | 1.18  | 1.23  | 1.21  | 1.46  | 1.26  | 1.20  | 1.17  | 0.67  | 1.34  | 1.04  | 1.18  | 0.59  | 1.03  | 1.18  | 1.40  |
| ITPR1 | 2.24E-01 | 3.44E-01 |  | -0.54 | -0.35 | -0.98 | -0.34 | -0.23 | -0.28 | 0.08  | -0.34 | 0.17  | -0.23 | 0.01  | -0.27 | -0.27 | 0.01  | -0.53 | -0.13 | -0.64 | -0.13 | -0.13 | -0.19 | 0.05  | -0.06 | -0.42 | -0.61 |
| AT2B1 | 2.28E-01 | 3.46E-01 |  | 0.87  | 1.21  | 1.14  | 1.18  | 1.36  | 1.20  | 0.91  | 1.21  | 0.95  | 1.39  | 1.40  | 1.45  | 1.24  | 0.94  | 1.23  | 0.96  | 1.01  | 1.30  | 1.36  | 1.48  | 1.34  | 1.31  | 1.46  | 1.29  |
| DIRA2 | 2.33E-01 | 3.48E-01 |  | 0.07  | -0.07 | -0.15 | -0.05 | -0.04 | -0.11 | -0.13 | 0.09  | 0.07  | -0.04 | 0.14  | 0.04  | 0.04  | 0.20  | -0.01 | -0.04 | -0.06 | 0.08  | 0.07  | 0.01  | 0.00  | 0.01  | 0.23  | 0.10  |

|       |          |          |  |       |       |       |       |       |       |       |       |       |       |       |       |       |       |       |       |       |       |       |       |       |       |       |       |
|-------|----------|----------|--|-------|-------|-------|-------|-------|-------|-------|-------|-------|-------|-------|-------|-------|-------|-------|-------|-------|-------|-------|-------|-------|-------|-------|-------|
| GPM6A | 2.42E-01 | 3.60E-01 |  | 1.07  | 1.25  | 1.31  | 1.24  | 1.42  | 1.35  | 1.01  | 1.42  | 0.79  | 1.33  | 1.31  | 1.47  | 1.27  | 0.92  | 1.29  | 0.91  | 1.12  | 1.25  | 1.40  | 1.44  | 1.68  | 1.36  | 1.59  | 1.25  |
| NEGR1 | 2.61E-01 | 3.87E-01 |  | 0.77  | 1.07  | 1.21  | 1.13  | 1.41  | 1.18  | 0.84  | 1.14  | 1.01  | 0.99  | 1.33  | 1.41  | 1.23  | 1.05  | 0.83  | 1.03  | 1.11  | 1.13  | 1.28  | 1.52  | 1.80  | 1.41  | 1.27  | 1.06  |
| NCPR  | 2.64E-01 | 3.90E-01 |  | -0.43 | 0.21  | -0.38 | 0.36  | 0.30  | 0.00  | 0.52  | -0.12 | 0.25  | 0.75  | -0.06 | 0.23  | 0.31  | 0.03  | 0.91  | 0.28  | -0.09 | 0.50  | 0.23  | 0.41  | -0.63 | -0.30 | 0.28  | 0.08  |
| STX1B | 2.93E-01 | 4.18E-01 |  | 1.17  | 1.13  | 1.31  | 1.28  | 1.53  | 1.42  | 1.24  | 1.56  | 1.02  | 1.50  | 1.39  | 1.51  | 1.39  | 1.08  | 1.47  | 1.03  | 1.36  | 1.22  | 1.34  | 1.51  | 1.50  | 1.29  | 1.56  | 1.44  |
| GRM3  | 2.96E-01 | 4.21E-01 |  | 1.75  | 1.90  | 1.78  | 1.95  | 2.15  | 2.09  | 1.73  | 2.11  | 1.92  | 2.03  | 2.36  | 2.29  | 2.09  | 1.91  | 1.76  | 1.83  | 1.56  | 2.17  | 2.10  | 2.44  | 1.75  | 2.32  | 2.48  | 2.24  |
| CLAP2 | 3.08E-01 | 4.30E-01 |  | -0.03 | 0.34  | -0.03 | 0.10  | -0.07 | -0.38 | 0.24  | -0.41 | 0.16  | 0.22  | 0.02  | -0.13 | -0.17 | 0.35  | 0.15  | -0.11 | -0.09 | 0.07  | -0.37 | -0.11 | -0.27 | -0.10 | -0.26 | 0.04  |
| AAK1  | 3.20E-01 | 4.44E-01 |  | 0.85  | 0.98  | 0.69  | 0.96  | 0.98  | 0.77  | 1.01  | 0.89  | 0.88  | 1.28  | 0.89  | 0.92  | 0.93  | 0.76  | 1.26  | 0.89  | 0.47  | 1.18  | 0.81  | 0.61  | 0.86  | 0.74  | 0.63  | 0.68  |
| CACB3 | 3.21E-01 | 4.44E-01 |  | 1.31  | 1.04  | 1.08  | 1.30  | 1.30  | 1.25  | 0.81  | 0.76  | 1.01  | 1.28  | 1.57  | 1.14  | 1.23  | 0.91  | 0.92  | 0.61  | 0.72  | 1.16  | 1.04  | 1.45  | 1.49  | 1.24  | 1.10  | 1.21  |
| ANXA3 | 3.24E-01 | 4.45E-01 |  | 1.61  | 1.72  | 2.95  | 1.86  | 2.37  | 2.08  | 2.00  | 2.32  | 1.74  | 2.30  | 1.88  | 2.26  | 2.16  | 2.06  | 2.70  | 2.09  | 1.67  | 2.42  | 2.36  | 2.54  | 2.31  | 2.69  | 2.93  | 2.46  |
| AOFB  | 3.29E-01 | 4.49E-01 |  | 1.80  | 1.33  | 1.73  | 1.16  | 1.36  | 1.32  | 1.41  | 1.12  | 1.67  | 1.39  | 1.38  | 1.27  | 1.60  | 1.28  | 1.22  | 1.41  | 1.84  | 1.49  | 1.08  | 1.53  | 1.65  | 0.82  | 0.38  | 1.30  |
| OPA1  | 3.32E-01 | 4.50E-01 |  | 1.94  | 1.62  | 1.84  | 1.99  | 1.83  | 1.94  | 2.04  | 1.64  | 1.93  | 1.85  | 1.76  | 2.00  | 2.10  | 1.87  | 2.08  | 2.18  | 2.11  | 1.78  | 1.59  | 1.74  | 1.92  | 1.77  | 2.06  | 1.77  |
| SAR1B | 3.50E-01 | 4.70E-01 |  | -0.10 | -0.21 | -0.27 | -0.41 | -0.70 | -0.29 | -0.19 | -0.84 | -0.20 | -0.38 | -0.13 | -0.08 | -0.16 | 0.20  | -0.24 | -0.49 | -0.06 | -0.09 | -0.40 | 0.20  | 0.09  | -0.13 | -0.82 | -0.53 |
| KPCG  | 3.60E-01 | 4.75E-01 |  | 0.47  | 0.51  | 0.25  | 0.34  | 0.30  | 0.29  | 0.28  | 0.33  | 0.54  | 0.23  | 0.68  | 0.25  | 0.60  | 0.65  | 0.21  | 0.32  | 0.01  | 0.82  | 0.92  | 0.93  | 0.27  | 0.57  | 0.68  | 0.71  |
| RHOB  | 3.71E-01 | 4.87E-01 |  | 0.73  | 0.70  | 0.82  | 0.72  | 0.80  | 0.78  | 0.55  | 0.75  | 0.49  | 0.77  | 0.61  | 0.74  | 0.81  | 0.85  | 0.90  | 0.51  | 0.64  | 0.61  | 0.68  | 0.76  | 0.72  | 0.51  | 0.51  | 0.68  |
| TFR1  | 3.74E-01 | 4.89E-01 |  | 0.32  | 0.30  | 0.45  | 0.45  | 0.41  | 0.43  | 0.36  | 0.63  | 0.25  | 0.68  | 0.48  | 0.63  | 0.46  | 0.10  | 0.55  | 0.39  | 0.33  | 0.26  | 0.38  | 0.54  | 0.55  | 0.45  | 0.69  | 0.50  |
| GBB1  | 3.85E-01 | 5.00E-01 |  | 0.90  | 0.98  | 1.15  | 0.97  | 1.18  | 1.00  | 0.88  | 1.19  | 0.75  | 1.08  | 1.14  | 1.24  | 1.07  | 0.96  | 1.14  | 0.89  | 1.20  | 1.01  | 1.14  | 1.21  | 1.39  | 1.10  | 1.26  | 1.04  |
| GRM2  | 3.85E-01 | 5.00E-01 |  | 1.56  | 1.82  | 1.69  | 1.79  | 1.90  | 1.81  | 1.59  | 2.03  | 1.72  | 1.84  | 2.04  | 2.27  | 2.06  | 1.77  | 1.80  | 1.74  | 1.73  | 1.94  | 2.24  | 2.03  | 1.54  | 2.12  | 2.30  | 2.07  |
| GRIA1 | 3.86E-01 | 5.00E-01 |  | 1.18  | 1.15  | 1.07  | 1.27  | 1.80  | 1.45  | 1.10  | 0.82  | 1.55  | 1.58  | 1.81  | 1.49  | 1.20  | 1.12  | 1.64  | 1.31  | 1.04  | 1.98  | 1.42  | 1.32  | 1.02  | 1.49  | 1.54  | 1.56  |
| ATPO  | 4.12E-01 | 5.20E-01 |  | -0.10 | 0.22  | 0.06  | 0.02  | 0.00  | 0.13  | -0.02 | 0.02  | 0.02  | 0.03  | -0.07 | -0.16 | -0.13 | 0.07  | 0.08  | 0.10  | 0.21  | -0.03 | 0.12  | -0.23 | -0.22 | 0.11  | -0.07 | -0.44 |
| NCAN  | 4.22E-01 | 5.31E-01 |  | -0.03 | 0.09  | 1.07  | -0.16 | 0.56  | 0.27  | 0.08  | -0.26 | 0.73  | -0.17 | 0.10  | 0.75  | 0.26  | 0.38  | -0.52 | 0.01  | 1.39  | 0.39  | 0.52  | 0.24  | 0.21  | 0.32  | -0.25 | -0.03 |
| GNAO  | 4.27E-01 | 5.35E-01 |  | 1.14  | 1.30  | 1.50  | 1.28  | 1.39  | 1.34  | 1.07  | 1.48  | 1.06  | 1.31  | 1.47  | 1.56  | 1.36  | 1.12  | 1.26  | 1.09  | 1.32  | 1.21  | 1.45  | 1.51  | 1.70  | 1.41  | 1.51  | 1.25  |
| GNAI1 | 4.39E-01 | 5.45E-01 |  | 0.90  | 0.91  | 1.00  | 0.99  | 1.13  | 0.89  | 0.77  | 0.88  | 0.83  | 1.05  | 1.03  | 1.08  | 0.94  | 1.04  | 1.09  | 0.90  | 0.96  | 0.91  | 1.06  | 0.96  | 0.99  | 1.06  | 1.26  | 0.99  |
| VGLU2 | 4.47E-01 | 5.48E-01 |  | 0.68  | 0.44  | 0.00  | 0.30  | 0.58  | 0.39  | -0.02 | 0.50  | 0.20  | 0.54  | 0.09  | 0.44  | 0.51  | 0.21  | -0.77 | -0.18 | -0.09 | 0.13  | 1.04  | 0.51  | 0.57  | 0.62  | 1.08  | -0.10 |
| FLOT2 | 4.78E-01 | 5.73E-01 |  | 0.79  | 0.58  | 0.77  | 0.44  | 0.50  | 0.62  | 0.52  | 0.31  | 0.37  | 0.94  | 0.51  | 0.87  | 0.78  | 0.74  | 0.42  | 0.87  | 0.87  | 0.60  | 0.94  | 0.84  | 1.89  | 0.75  | 0.99  | 0.23  |
| EF1A1 | 4.94E-01 | 5.83E-01 |  | -0.10 | -0.20 | -0.71 | -0.39 | -0.23 | -0.26 | -0.20 | -0.47 | -0.05 | -0.44 | -0.35 | -0.31 | -0.11 | -0.01 | -0.33 | -0.18 | -0.79 | -0.01 | -0.33 | -0.21 | -0.57 | -0.50 | -0.55 | -0.25 |
| STX1A | 5.02E-01 | 5.91E-01 |  | 1.26  | 1.32  | 1.85  | 1.44  | 1.61  | 1.53  | 1.13  | 1.86  | 1.22  | 1.59  | 1.57  | 1.75  | 1.53  | 1.15  | 1.63  | 1.24  | 1.83  | 1.33  | 1.49  | 1.71  | 2.27  | 1.71  | 1.75  | 1.37  |
| KCNA1 | 5.03E-01 | 5.91E-01 |  | 0.88  | 1.18  | 1.09  | 1.17  | 1.45  | 1.01  | 1.03  | 1.61  | 0.88  | 1.16  | 1.12  | 1.32  | 1.32  | 1.17  | 1.68  | 1.34  | 0.81  | 1.42  | 1.62  | 1.41  | 1.02  | 1.14  | 1.72  | 1.55  |
| SYT2  | 5.09E-01 | 5.94E-01 |  | 0.56  | 0.73  | 0.59  | 0.75  | 0.91  | 0.83  | 0.68  | 0.92  | 0.59  | 0.72  | 0.79  | 0.87  | 0.83  | 0.56  | 0.92  | 0.50  | 0.58  | 0.63  | 0.71  | 0.81  | 0.67  | 0.51  | 0.83  | 0.78  |
| XPOT  | 5.08E-01 | 5.94E-01 |  | -0.66 | -0.33 | -0.31 | -0.23 | -0.42 | -0.31 | -0.50 | -0.07 | -0.77 | -0.67 | -0.44 | -0.14 | -0.71 | -0.88 | -0.25 | -0.43 | -0.79 | -1.02 | -0.45 | -0.43 | -0.76 | -0.63 | 0.00  | -0.63 |
| NMDZ1 | 5.33E-01 | 6.18E-01 |  | 1.25  | 1.27  | 0.85  | 1.32  | 1.07  | 1.17  | 1.28  | 0.68  | 1.23  | 1.03  | 1.21  | 0.99  | 1.26  | 1.21  | 1.09  | 1.16  | 0.94  | 1.45  | 1.17  | 1.40  | 1.30  | 1.36  | 1.19  | 1.28  |
| SYT1  | 5.41E-01 | 6.21E-01 |  | 1.04  | 1.17  | 1.23  | 1.16  | 1.43  | 1.35  | 1.07  | 1.40  | 0.97  | 1.35  | 1.33  | 1.46  | 1.24  | 1.09  | 1.30  | 0.97  | 1.12  | 1.12  | 1.29  | 1.24  | 1.35  | 1.07  | 1.37  | 1.17  |
| EAA1  | 5.54E-01 | 6.31E-01 |  | 1.07  | 0.47  | 1.06  | 1.00  | 1.41  | 1.24  | 1.27  | 0.81  | 1.30  | 1.31  | 0.84  | 1.40  | 1.34  | 1.40  | 1.39  | 0.76  | 1.43  | 1.43  | 0.65  | 1.46  | 1.67  | 1.36  | 0.80  | 1.39  |
| RGS7  | 5.73E-01 | 6.48E-01 |  | 1.05  | 0.90  | 1.07  | 1.10  | 0.93  | 1.08  | 0.80  | 1.19  | 0.84  | 1.25  | 0.88  | 1.07  | 1.30  | 0.78  | 1.24  | 0.75  | 0.90  | 0.50  | 0.93  | 1.14  | 0.97  | 1.24  | 1.23  | 1.14  |
| SYN2  | 6.09E-01 | 6.83E-01 |  | -0.05 | 0.02  | 0.03  | 0.02  | -0.02 | 0.14  | -0.05 | 0.21  | -0.08 | 0.19  | 0.15  | 0.03  | 0.13  | -0.01 | 0.09  | 0.03  | 0.15  | -0.08 | 0.10  | -0.07 | 0.05  | -0.06 | 0.05  | -0.22 |
| GNAS2 | 6.23E-01 | 6.92E-01 |  | 1.06  | 0.68  | 0.86  | 0.73  | 1.21  | 0.57  | 0.50  | 0.79  | 0.62  | 0.66  | 0.69  | 0.87  | 0.78  | 1.12  | 0.93  | 0.71  | 0.96  | 0.90  | 0.79  | 0.94  | 0.59  | 0.73  | 0.81  | 0.86  |
| CAP2  | 6.47E-01 | 7.12E-01 |  | -0.96 | -0.93 | -0.32 | -0.68 | -0.89 | -0.28 | -0.97 | -0.90 | -0.53 | -0.46 | -1.02 | -0.63 | -0.84 | -0.70 | -0.45 | -1.11 | 0.63  | -0.90 | -0.89 | -0.92 | -0.38 | 0.08  | -0.36 | -0.69 |
| SYT7  | 6.97E-01 | 7.54E-01 |  | 0.52  | 0.43  | 0.29  | 0.82  | 0.84  | 0.77  | 0.75  | 0.41  | 0.57  | 1.14  | 0.47  | 0.81  | 0.86  | 0.37  | 1.05  | 0.55  | 0.76  | 0.89  | 0.60  | 1.04  | 0.61  | 0.26  | 0.83  | 1.02  |
| AKA12 | 7.07E-01 | 7.63E-01 |  | 0.89  | 1.31  | 1.86  | 1.27  | 1.94  | 1.15  | 1.34  | 1.86  | 1.25  | 1.42  | 1.90  | 1.63  | 1.55  | 1.07  | 1.54  | 1.27  | 1.29  | 1.29  | 1.35  | 1.81  | 1.46  | 1.65  | 1.54  | 1.69  |
| S12A5 | 7.20E-01 | 7.67E-01 |  | 0.84  | 1.10  | 0.92  | 0.99  | 1.21  | 1.17  | 1.01  | 0.94  | 0.99  | 1.22  | 1.12  | 1.35  | 1.17  | 0.89  | 1.00  | 0.78  | 0.53  | 1.24  | 1.11  | 1.27  | 0.67  | 1.17  | 1.37  | 1.26  |
| GBRG2 | 7.58E-01 | 8.00E-01 |  | 1.04  | 1.00  | 0.53  | 0.63  | 0.95  | 0.91  | 1.09  | 0.29  | 0.84  | 1.54  | 0.92  | 0.93  | 0.74  | 1.22  | 1.05  | 0.99  | 0.76  | 1.14  | 0.77  | 1.24  | 1.07  | 1.55  | 0.08  | 0.05  |
| QCR2  | 7.58E-01 | 8.00E-01 |  | 1.28  | 1.61  | 1.15  | 1.10  | 0.78  | 1.31  | 1.70  | 1.25  | 1.41  | 1.42  | 1.36  | 1.12  | 1.26  | 1.21  | 1.05  | 1.60  | 1.65  | 1.45  | 1.33  | 0.84  | 0.63  | 1.81  | 0.33  | 1.14  |
| PRDX2 | 7.75E-01 | 8.15E-01 |  | 1.11  | 0.92  | 1.43  | 1.04  | 0.87  | 1.23  | 1.31  | 0.49  | 1.11  | 1.13  | 0.56  | 0.60  | 0.83  | 0.78  | 1.26  | 0.82  | 1.33  | 1.09  | 0.32  | 0.48  | 1.20  | 0.92  | 0.12  | 0.88  |
| FARP1 | 7.91E-01 | 8.27E-01 |  | 0.39  | 0.53  | 0.49  | 0.20  | -0.10 | 0.60  | 0.40  | 0.12  | 0.44  | 0.43  | 0.43  | 0.63  | 0.41  | 0.38  | 0.12  | 0.38  | -0.12 | 0.54  | 0.41  | 0.49  | 0.15  | 0.53  | 0.70  | 0.16  |
| AT1A3 | 8.11E-01 | 8.46E-01 |  | 0.98  | 1.07  | 0.89  | 1.04  | 1.35  | 1.17  | 1.07  | 1.19  | 0.92  | 1.21  | 1.10  | 1.23  | 1.26  | 1.10  | 1.31  | 0.97  | 0.54  | 1.20  | 1.23  | 1.28  | 0.76  | 1.02  | 1.36  | 1.31  |

|        |          |          |  |       |       |       |       |       |       |       |       |       |       |       |       |       |       |       |       |      |       |       |       |      |       |       |       |
|--------|----------|----------|--|-------|-------|-------|-------|-------|-------|-------|-------|-------|-------|-------|-------|-------|-------|-------|-------|------|-------|-------|-------|------|-------|-------|-------|
| CNTN2  | 8.35E-01 | 8.64E-01 |  | 0.73  | 0.75  | 1.34  | 1.25  | 0.56  | 0.63  | 0.77  | 1.10  | 0.63  | 0.41  | 0.52  | 1.27  | 0.52  | 1.35  | 0.70  | 0.45  | 1.63 | 0.66  | 0.59  | 0.94  | 1.51 | 0.76  | 0.35  | 1.03  |
| NCAM1  | 8.38E-01 | 8.64E-01 |  | 0.93  | 1.07  | 0.89  | 0.89  | 1.27  | 1.04  | 0.90  | 1.07  | 0.67  | 0.99  | 1.04  | 1.23  | 1.10  | 0.91  | 1.13  | 0.87  | 0.86 | 1.01  | 1.13  | 1.17  | 1.28 | 0.96  | 1.16  | 0.89  |
| AT1B1  | 8.61E-01 | 8.79E-01 |  | 0.98  | 1.10  | 0.78  | 1.03  | 1.31  | 1.11  | 1.01  | 1.28  | 0.93  | 1.21  | 1.12  | 1.32  | 1.16  | 1.03  | 1.28  | 0.92  | 0.47 | 1.19  | 1.21  | 1.34  | 0.71 | 1.04  | 1.35  | 1.33  |
| B7Z1I4 | 8.77E-01 | 8.91E-01 |  | 1.04  | 1.15  | 1.06  | 1.22  | 1.21  | 1.06  | 0.96  | 1.29  | 1.00  | 1.16  | 1.25  | 1.50  | 1.33  | 1.17  | 1.16  | 0.90  | 0.82 | 1.16  | 1.40  | 1.42  | 1.23 | 1.14  | 1.49  | 1.14  |
| E41L1  | 9.23E-01 | 9.28E-01 |  | -1.17 | -0.80 | -0.34 | -0.62 | -0.37 | -0.82 | -0.72 | -0.30 | -0.50 | -0.98 | -0.44 | -0.88 | -0.48 | -0.84 | -1.10 | -0.84 | 0.28 | -0.97 | -0.60 | -1.08 | 0.05 | -0.98 | -0.47 | -0.94 |

Reports the log 2 synaptosome protein levels for each sample as well as significance of the association between PMI and homogenate protein levels.

**eTable 5. Monkey APD Homogenate**

| Haloperidol |              |              |              |             |              |             |             | Olanzapine |              |              |              |             |              |             |             |
|-------------|--------------|--------------|--------------|-------------|--------------|-------------|-------------|------------|--------------|--------------|--------------|-------------|--------------|-------------|-------------|
| ProName     | control.ave  | sz.ave       | diff         | FoldChange  | statistic    | pvalue      | qvalue      | ProName    | control.ave  | sz.ave       | diff         | FoldChange  | statistic    | pvalue      | qvalue      |
| DYN2        | -0.12632549  | -0.146373852 | -0.020048362 | 0.986199645 | -0.687566552 | 0.522313771 | 0.909986598 | DYN2       | -0.12632549  | -0.219273162 | -0.092947671 | 0.937605104 | -6.224597365 | 0.001565215 | 0.328298723 |
| DLGP2       | -0.348451992 | -0.328823022 | 0.01962897   | 1.013698745 | 0.321691711  | 0.760699734 | 0.949228553 | DLGP2      | -0.348451992 | -0.067533038 | 0.280918954  | 1.214968537 | 5.562634925  | 0.002583266 | 0.328298723 |
| NDUV1       | 0.56260416   | 0.521908166  | -0.040695993 | 0.972185827 | -1.137033985 | 0.30706206  | 0.902826709 | NDUV1      | 0.56260416   | 0.327317351  | -0.235286808 | 0.849516098 | -5.551788847 | 0.002605545 | 0.328298723 |
| KPCA        | -0.07910623  | 0.365489315  | 0.444595545  | 1.36093253  | 2.263066763  | 0.073070438 | 0.902826709 | KPCA       | -0.07910623  | 0.467567549  | 0.546673778  | 1.460714045 | 4.942235358  | 0.004313746 | 0.361440481 |
| KPCG        | -2.036425375 | -1.715613644 | 0.32081173   | 1.249033118 | 1.098357403  | 0.322102313 | 0.902826709 | KPCG       | -2.036425375 | -1.397276121 | 0.639149253  | 1.557410495 | 4.824153196  | 0.004780959 | 0.361440481 |
| PDE2A       | -0.130400233 | 0.441583509  | 0.571983742  | 1.486566232 | 2.104919425  | 0.089194793 | 0.902826709 | PDE2A      | -0.130400233 | 0.527684699  | 0.658084932  | 1.577986576 | 4.446665164  | 0.00672311  | 0.423555958 |
| DLGP4       | -0.359359427 | -0.441336412 | -0.081976985 | 0.944762112 | -1.575998472 | 0.175847915 | 0.902826709 | DLGP4      | -0.359359427 | -0.560416347 | -0.201056921 | 0.86991303  | -4.240075911 | 0.00816901  | 0.441126531 |
| GBRG2       | -0.438506771 | -0.190201221 | 0.24830555   | 1.187811207 | 0.761765078  | 0.48056793  | 0.902826709 | GBRG2      | -0.438506771 | 0.317664652  | 0.756171422  | 1.689002452 | 3.797514067  | 0.012660642 | 0.584389899 |
| VDAC3       | 0.478443635  | 0.405980667  | -0.072462967 | 0.951013043 | -1.399985816 | 0.220407873 | 0.902826709 | VDAC3      | 0.478443635  | 0.341071501  | -0.137372133 | 0.909173706 | -3.634210658 | 0.01499419  | 0.584389899 |
| CDC42       | 1.040875882  | 1.001984655  | -0.038891227 | 0.973402762 | -0.513879693 | 0.629232358 | 0.930506741 | CDC42      | 1.040875882  | 1.129980407  | 0.089104524  | 1.063709737 | 3.54373569   | 0.016496929 | 0.584389899 |
| GBB1        | 1.091022297  | 1.115597929  | 0.024575632  | 1.017180445 | 0.666885767  | 0.534380397 | 0.917701402 | GBB1       | 1.091022297  | 1.245198298  | 0.154176001  | 1.112785866 | 3.505281335  | 0.0171871   | 0.584389899 |
| GNAQ        | -0.662276214 | -0.496381371 | 0.165894843  | 1.121861706 | 1.423873972  | 0.213779979 | 0.902826709 | GNAQ       | -0.662276214 | -0.238271309 | 0.424004905  | 1.341646786 | 3.434155969  | 0.01855206  | 0.584389899 |
| KAP3        | -0.125514431 | -0.127831972 | -0.002317541 | 0.998394892 | -0.029864909 | 0.977330205 | 0.98544248  | KAP3       | -0.125514431 | -0.012685827 | 0.112828604  | 1.081346289 | 3.246848774  | 0.022775387 | 0.597683224 |
| 1433T       | -0.683445197 | -0.756926895 | -0.073481698 | 0.950341741 | -1.536029108 | 0.185129454 | 0.902826709 | 1433T      | -0.683445197 | -0.762184983 | -0.078739786 | 0.946884402 | -3.146068875 | 0.025491498 | 0.597683224 |
| ACOC        | 0.443199858  | 0.73262897   | 0.289429112  | 1.222156563 | 2.051240889  | 0.09549187  | 0.902826709 | ACOC       | 0.443199858  | 0.794738146  | 0.351538288  | 1.275920366 | 3.08114661   | 0.027433866 | 0.597683224 |
| UBP5        | -0.642879797 | -0.470611499 | 0.172268298  | 1.126828765 | 1.421519657  | 0.214424701 | 0.902826709 | UBP5       | -0.642879797 | -0.475375253 | 0.167504544  | 1.123114133 | 3.048004145  | 0.028489138 | 0.597683224 |
| GNAO        | 1.047076591  | 1.086838785  | 0.039762195  | 1.027944373 | 1.326432084  | 0.242051087 | 0.902826709 | GNAO       | 1.047076591  | 1.176921621  | 0.12984503   | 1.094176162 | 3.044114591  | 0.028615941 | 0.597683224 |
| DLG4        | 0.854846337  | 0.958891979  | 0.104045641  | 1.074783174 | 0.560407582  | 0.599381356 | 0.922353168 | DLG4       | 0.854846337  | 1.10633056   | 0.251484222  | 1.190431182 | 3.010030102  | 0.029754582 | 0.597683224 |
| GLSK        | 0.375513835  | 0.257106254  | -0.118407581 | 0.921203897 | -2.00912889  | 0.100758279 | 0.902826709 | GLSK       | 0.375513835  | 0.213446448  | -0.162067386 | 0.893743416 | -2.972807834 | 0.031056341 | 0.597683224 |
| FARP1       | -0.161855593 | -0.748771698 | -0.586916105 | 0.665764521 | -2.843192244 | 0.036110908 | 0.902826709 | FARP1      | -0.161855593 | -0.748322149 | -0.586466555 | 0.665972008 | -2.9571339   | 0.031623451 | 0.597683224 |
| SV2A        | -0.002027099 | -0.119698152 | -0.117671053 | 0.921674312 | -2.717603869 | 0.041894454 | 0.902826709 | SV2A       | -0.002027099 | -0.148469712 | -0.146442613 | 0.903475502 | -2.903253767 | 0.033662926 | 0.599301689 |
| CKAP4       | -0.111463826 | -0.418764748 | -0.307300921 | 0.808152285 | -2.150940894 | 0.084144869 | 0.902826709 | CKAP4      | -0.111463826 | -0.419738734 | -0.308274907 | 0.807606873 | -2.861749693 | 0.035334026 | 0.599301689 |
| RAP1A       | -0.493770934 | -0.347099954 | 0.14667098   | 1.107012092 | 1.356665886  | 0.232924605 | 0.902826709 | RAP1A      | -0.493770934 | -0.243681709 | 0.250089225  | 1.189280665 | 2.829355263  | 0.03670253  | 0.599301689 |
| CXA1        | 0.327601979  | 0.891712854  | 0.564110875  | 1.478476052 | 1.978525787  | 0.104775394 | 0.902826709 | CXA1       | 0.327601979  | 0.921956328  | 0.594354348  | 1.509796753 | 2.750334469  | 0.040294216 | 0.599301689 |
| ADT3        | 0.272577254  | 0.188479539  | -0.084097715 | 0.943374353 | -0.789686363 | 0.473888239 | 0.902826709 | ADT3       | 0.272577254  | 0.06295455   | -0.209622704 | 0.864763356 | -2.851715919 | 0.046315396 | 0.599301689 |
| PP1A        | -0.813074937 | -0.872272495 | -0.059197558 | 0.95979782  | -1.759146321 | 0.138875994 | 0.902826709 | PP1A       | -0.813074937 | -0.751737921 | 0.061337016  | 1.043432313 | 2.619405913  | 0.047131535 | 0.599301689 |
| ACLY        | -1.256346006 | -1.321736499 | -0.065390493 | 0.955686608 | -0.684442463 | 0.52412466  | 0.909986598 | ACLY       | -1.256346006 | -1.537888392 | -0.281542385 | 0.822710987 | -2.591798606 | 0.04873063  | 0.599301689 |
| ANK1        | 0.890941749  | 0.725458375  | -0.165483374 | 0.891629729 | -2.360379578 | 0.064720531 | 0.902826709 | ANK1       | 0.890941749  | 0.69398986   | -0.196951889 | 0.872391798 | -2.531863171 | 0.0524108   | 0.599301689 |
| DMXL2       | -0.537603442 | -0.471371904 | 0.066231538  | 1.046978298 | 0.229104542  | 0.827864023 | 0.96278586  | DMXL2      | -0.537603442 | 0.044662551  | 0.582265993  | 1.497199003 | 2.509128466  | 0.053885352 | 0.599301689 |
| CNTN2       | 1.1711392    | 1.541074759  | 0.36993556   | 1.292295107 | 1.73612148   | 0.143058282 | 0.902826709 | CNTN2      | 1.1711392    | 0.735713517  | -0.435425683 | 0.739475532 | -2.498056021 | 0.054619838 | 0.599301689 |
| PSD12       | -0.189721678 | -0.396871808 | -0.207150131 | 0.866246708 | -3.914066981 | 0.011248877 | 0.902826709 | PSD12      | -0.189721678 | -0.344472838 | -0.154751161 | 0.898287298 | -2.486005728 | 0.055431611 | 0.599301689 |
| HS90B       | -0.443794679 | -0.564011705 | -0.120217027 | 0.920049236 | -2.983612807 | 0.030672017 | 0.902826709 | HS90B      | -0.443794679 | -0.557812124 | -0.114017445 | 0.924011399 | -2.463210626 | 0.057003372 | 0.599301689 |
| NMDZ1       | -0.138897084 | -0.101826023 | 0.037071061  | 1.026028682 | 0.248741431  | 0.81345487  | 0.962614207 | NMDZ1      | -0.138897084 | -0.0026583   | 0.136238785  | 1.099036107 | 2.370428937  | 0.063918676 | 0.599301689 |
| CALM2       | -0.04632038  | -0.041331844 | 0.004988536  | 1.003463775 | 0.062406703  | 0.952656867 | 0.983039409 | CALM2      | -0.04632038  | -0.217653196 | -0.171332815 | 0.888021914 | -2.359596613 | 0.06478346  | 0.599301689 |
| CISY        | -0.664332805 | -0.760680951 | -0.096348146 | 0.935397744 | -1.633527866 | 0.163286118 | 0.902826709 | CISY       | -0.664332805 | -0.823195357 | -0.158862552 | 0.895731004 | -2.347050633 | 0.065800862 | 0.599301689 |
| CALR        | -0.592159039 | -0.665543289 | -0.07338425  | 0.950405935 | -1.146106501 | 0.303623925 | 0.902826709 | CALR       | -0.592159039 | -0.731981746 | -0.139822707 | 0.907630688 | -2.334592027 | 0.066828248 | 0.599301689 |
| AT1A1       | 1.132651049  | 1.104876644  | -0.027774406 | 0.98093238  | -0.423182514 | 0.689747221 | 0.937857733 | AT1A1      | 1.132651049  | 0.996790109  | -0.13586094  | 0.910126546 | -2.318633892 | 0.068169532 | 0.599301689 |
| GLPK        | -0.888494542 | -0.94938861  | -0.060894067 | 0.958669828 | -0.321425853 | 0.760889555 | 0.949228553 | GLPK       | -0.888494542 | -1.202398604 | -0.313904062 | 0.804461865 | -2.313663179 | 0.068593217 | 0.599301689 |
| PACN1       | 0.551785157  | 0.810664814  | 0.258879656  | 1.196549148 | 2.462256511  | 0.057070208 | 0.902826709 | PACN1      | 0.551785157  | 0.759803295  | 0.208018137  | 1.155100306 | 2.295199692  | 0.070191934 | 0.599301689 |
| GNAI1       | 0.560292859  | 0.625328926  | 0.065036066  | 1.046111091 | 0.792919019  | 0.463771024 | 0.902826709 | GNAI1      | 0.560292859  | 0.727377943  | 0.167085084  | 1.122787638 | 2.280827691  | 0.07146407  | 0.599301689 |
| RAB1A       | 0.629637311  | 0.670279084  | 0.040641773  | 1.028571278 | 0.501761955  | 0.637143898 | 0.930506741 | RAB1A      | 0.629637311  | 0.748675659  | 0.119038348  | 1.086010723 | 2.238878748  | 0.075320574 | 0.599301689 |

|       |              |              |              |             |              |             |             |       |              |              |              |             |              |             |             |
|-------|--------------|--------------|--------------|-------------|--------------|-------------|-------------|-------|--------------|--------------|--------------|-------------|--------------|-------------|-------------|
| FLNC  | -0.781486955 | -0.593488538 | 0.187998417  | 1.139182127 | 1.679009856  | 0.153987881 | 0.902826709 | FLNC  | -0.781486955 | -0.635191421 | 0.146295534  | 1.10672404  | 2.216453577  | 0.077472966 | 0.599301689 |
| NEGR1 | 0.644558315  | 0.914462288  | 0.269903973  | 1.205727571 | 1.767099638  | 0.137460247 | 0.902826709 | NEGR1 | 0.644558315  | 0.98599074   | 0.341432425  | 1.267013964 | 2.199907635  | 0.079103099 | 0.599301689 |
| AP2B1 | 0.198415729  | 0.055710764  | -0.142704964 | 0.905819207 | -3.574415461 | 0.015968893 | 0.902826709 | AP2B1 | 0.198415729  | 0.096979828  | -0.1014359   | 0.932104815 | -2.198509418 | 0.079242518 | 0.599301689 |
| GRIA3 | 0.102836582  | 0.673649384  | 0.570812802  | 1.485360174 | 2.145364886  | 0.08474027  | 0.902826709 | GRIA3 | 0.102836582  | 0.806120018  | 0.703283437  | 1.628206221 | 2.178817772  | 0.08123405  | 0.599301689 |
| HS90A | 0.089747109  | 0.029733773  | -0.060013336 | 0.959255252 | -0.892243181 | 0.413138172 | 0.902826709 | HS90A | 0.089747109  | 0.013137145  | -0.076609964 | 0.948283301 | -2.139092468 | 0.085415374 | 0.599301689 |
| CNTP1 | 1.887684817  | 1.750334139  | -0.137350677 | 0.909187228 | -1.409543607 | 0.217732981 | 0.902826709 | CNTP1 | 1.887684817  | 1.663347596  | -0.224337221 | 0.855988179 | -2.136919585 | 0.08565057  | 0.599301689 |
| OPA1  | 2.285610041  | 2.316482567  | 0.030872525  | 1.021629809 | 0.11447608   | 0.913315306 | 0.982274947 | OPA1  | 2.285610041  | 1.909445928  | -0.376164113 | 0.770483458 | -2.136448479 | 0.085701653 | 0.599301689 |
| RHOA  | -0.016683043 | 0.048109014  | 0.064792057  | 1.045934173 | 0.828096691  | 0.445329429 | 0.902826709 | RHOA  | -0.016683043 | 0.128182915  | 0.144865958  | 1.105627924 | 2.135851436  | 0.085766439 | 0.599301689 |
| MDHC  | -0.176034859 | -0.262838809 | -0.08680395  | 0.941606412 | -1.396537538 | 0.221380529 | 0.902826709 | MDHC  | -0.176034859 | -0.288671047 | -0.112636187 | 0.924896485 | -2.125721371 | 0.086873598 | 0.599301689 |
| CAPS1 | -0.80772392  | -0.754383032 | 0.053340889  | 1.037665093 | 0.49436662   | 0.641999384 | 0.930506741 | CAPS1 | -0.80772392  | -0.972209064 | -0.164485144 | 0.89224688  | -2.123276095 | 0.087143112 | 0.599301689 |
| 2A5D  | 0.105571101  | 0.09820312   | -0.007367982 | 0.994905923 | -0.086413983 | 0.934491154 | 0.983039409 | 2A5D  | 0.105571101  | -0.144298545 | -0.249869646 | 0.840972397 | -2.119801709 | 0.087527575 | 0.599301689 |
| HS12A | 0.955797278  | 0.898560601  | -0.057236677 | 0.961103244 | -1.013181809 | 0.357464028 | 0.902826709 | HS12A | 0.955797278  | 0.875338371  | -0.080458907 | 0.945756763 | -2.111691425 | 0.088432024 | 0.599301689 |
| VATH  | -0.457346934 | -0.531930062 | -0.074583128 | 0.949616477 | -1.078787934 | 0.329951766 | 0.902826709 | VATH  | -0.457346934 | -0.58142277  | -0.124075836 | 0.917591647 | -2.109025929 | 0.088731429 | 0.599301689 |
| VDAC1 | -0.553378072 | -0.578872255 | -0.025494183 | 0.982483999 | -0.586238649 | 0.583180213 | 0.922353168 | VDAC1 | -0.553378072 | -0.633689212 | -0.080311139 | 0.945853637 | -2.092990673 | 0.090555336 | 0.599301689 |
| GDS1  | -1.221518533 | -1.300871677 | -0.079353145 | 0.946481922 | -1.303130717 | 0.249310152 | 0.902826709 | GDS1  | -1.221518533 | -1.320358943 | -0.09884041  | 0.933783233 | -2.072661031 | 0.092924702 | 0.599301689 |
| SEPT7 | 0.825302445  | 0.752065578  | -0.073236867 | 0.950503031 | -2.585007276 | 0.049133061 | 0.902826709 | SEPT7 | 0.825302445  | 0.72187349   | -0.103428955 | 0.93081802  | -2.059491009 | 0.094494391 | 0.599301689 |
| PAK3  | 0.057794887  | -0.08985231  | -0.147647196 | 0.902721456 | -1.055114836 | 0.339665167 | 0.902826709 | PAK3  | 0.057794887  | -0.245492328 | -0.303287215 | 0.810403767 | -2.034279337 | 0.097577479 | 0.599301689 |
| CSK1  | 0.185137901  | -0.074311662 | -0.259449563 | 0.835406595 | -1.062869678 | 0.33645682  | 0.902826709 | CSK1  | 0.185137901  | -0.202237531 | -0.387375431 | 0.764519163 | -2.027064518 | 0.098479046 | 0.599301689 |
| ENOG  | 0.595763632  | 0.608207627  | 0.012443995  | 1.008662827 | 0.824066379  | 0.447413991 | 0.902826709 | ENOG  | 0.595763632  | 0.444558367  | -0.151205265 | 0.900497849 | -2.004847993 | 0.1013104   | 0.599301689 |
| GUAD  | -0.337003695 | -0.149270658 | 0.187733037  | 1.138972597 | 0.997767919  | 0.364199249 | 0.902826709 | GUAD  | -0.337003695 | -0.026655358 | 0.310348336  | 1.240007062 | 2.004325571  | 0.101377994 | 0.599301689 |
| ADT1  | -0.126949862 | -0.154448082 | -0.02749822  | 0.981120186 | -0.385288759 | 0.715869438 | 0.946149117 | ADT1  | -0.126949862 | -0.26609696  | -0.139147098 | 0.908055827 | -2.003602216 | 0.101471665 | 0.599301689 |
| ARP3  | -1.583050715 | -1.557899688 | 0.025151026  | 1.017586211 | 0.415950974  | 0.694696159 | 0.940502232 | ARP3  | -1.583050715 | -1.465067696 | 0.117983018  | 1.085216598 | 1.996409133  | 0.102408061 | 0.599301689 |
| AT1A2 | -0.951210042 | -0.9509237   | 0.000286342  | 1.000198497 | 0.004001446  | 0.996962058 | 0.998556552 | AT1A2 | -0.951210042 | -1.157744717 | -0.206534675 | 0.866616328 | -1.993957269 | 0.102729302 | 0.599301689 |
| ATPA  | -0.34109622  | -0.397633506 | -0.056537286 | 0.961569282 | -1.050399405 | 0.341628685 | 0.902826709 | ATPA  | -0.34109622  | -0.469673801 | -0.128577581 | 0.914732883 | -1.991483169 | 0.103054523 | 0.599301689 |
| AATM  | -0.575868952 | -0.696568028 | -0.120699075 | 0.919741871 | -1.934661264 | 0.110826303 | 0.902826709 | AATM  | -0.575868952 | -0.750555299 | -0.174686347 | 0.885960113 | -1.927725544 | 0.111815762 | 0.629265273 |
| VIME  | 2.540561021  | 2.910758898  | 0.370197877  | 1.292530099 | 0.926333075  | 0.396784661 | 0.902826709 | VIME  | 2.540561021  | 3.040819242  | 0.50025822   | 1.414466708 | 1.924776123  | 0.112239298 | 0.629265273 |
| ZNT1  | 0.309718794  | 0.473250764  | 0.16353197   | 1.120025804 | 2.624819632  | 0.046824761 | 0.902826709 | ZNT1  | 0.309718794  | 0.406494499  | 0.096775705  | 1.069380819 | 1.909513766  | 0.114457633 | 0.629265273 |
| VATE1 | -0.606690035 | -0.674723798 | -0.068033763 | 0.953937226 | -3.148876527 | 0.025411056 | 0.902826709 | VATE1 | -0.606690035 | -0.653089161 | -0.046399126 | 0.968350255 | -1.9067383   | 0.114865883 | 0.629265273 |
| CKAP5 | 0.715593879  | 0.733843872  | 0.018249993  | 1.01273028  | 0.112623397  | 0.914711062 | 0.982274947 | CKAP5 | 0.715593879  | 0.933084162  | 0.217490283  | 1.162709173 | 1.888220713  | 0.117628421 | 0.635193471 |
| DLG3  | -0.343874764 | 0.091081198  | 0.434955962  | 1.351869567 | 2.23477793   | 0.075709352 | 0.902826709 | DLG3  | -0.343874764 | -0.706368311 | -0.362493548 | 0.777819038 | -1.835633722 | 0.125852345 | 0.670030797 |
| EAA1  | 0.697687048  | 0.657806264  | -0.039880784 | 0.972735326 | -0.535375603 | 0.615336066 | 0.926681406 | EAA1  | 0.697687048  | 0.824224999  | 0.126537951  | 1.091670863 | 1.802337911  | 0.13136162  | 0.67729663  |
| ANK3  | -1.12628571  | -1.231536756 | -0.105251046 | 0.92964316  | -0.66321812  | 0.536539709 | 0.917701402 | ANK3  | -1.12628571  | -0.696722075 | 0.429563636  | 1.346826148 | 1.800622468  | 0.13165204  | 0.67729663  |
| VDAC2 | 0.831136947  | 0.78698049   | -0.044156457 | 0.969856726 | -1.06791603  | 0.334382887 | 0.902826709 | VDAC2 | 0.831136947  | 0.738930758  | -0.092206189 | 0.938087116 | -1.785679547 | 0.13420963  | 0.67729663  |
| PHB2  | 0.309965196  | 0.323970333  | 0.014005137  | 1.009754893 | 0.229040217  | 0.827911354 | 0.96278586  | PHB2  | 0.309965196  | 0.479228733  | 0.169263536  | 1.124484314 | 1.776919472  | 0.135732402 | 0.67729663  |
| DLG2  | -0.273779435 | -0.262009794 | 0.011769641  | 1.008191462 | 0.132253176  | 0.899941398 | 0.982274947 | DLG2  | -0.273779435 | -0.112860361 | 0.160919074  | 1.117999137 | 1.76207077   | 0.138353713 | 0.67729663  |
| ACON  | -0.676530795 | -0.711409207 | -0.034878411 | 0.976114023 | -0.466346777 | 0.660579096 | 0.930506741 | ACON  | -0.676530795 | -0.828239594 | -0.151708799 | 0.900183609 | -1.758266783 | 0.139033462 | 0.67729663  |
| ALDH2 | 0.289770224  | 0.530866852  | 0.241096628  | 1.181890704 | 1.186594868  | 0.288689928 | 0.902826709 | ALDH2 | 0.289770224  | 0.490053563  | 0.200283338  | 1.148923976 | 1.754223809  | 0.139759622 | 0.67729663  |
| GPM6A | 0.690844301  | 0.669165484  | -0.021678816 | 0.985085726 | -0.73291855  | 0.496507873 | 0.902826709 | GPM6A | 0.690844301  | 0.805075395  | 0.114231094  | 1.082398011 | 1.732175735  | 0.143787655 | 0.684147739 |
| NDUS4 | 0.55273016   | 0.284286747  | -0.268443413 | 0.830214818 | -2.096427813 | 0.090161079 | 0.902826709 | NDUS4 | 0.55273016   | 0.302512292  | -0.250217868 | 0.840769437 | -1.721362924 | 0.145805669 | 0.684147739 |
| S4A4  | -1.417326958 | -1.436251126 | -0.018924168 | 0.986968422 | -0.199692254 | 0.849588648 | 0.978693753 | S4A4  | -1.417326958 | -1.529202484 | -0.111875526 | 0.925384265 | -1.710940895 | 0.14777772  | 0.684147739 |
| ODO1  | -1.372895153 | -0.969118281 | 0.403776873  | 1.322966814 | 2.144147589  | 0.084870845 | 0.902826709 | ODO1  | -1.372895153 | -1.036976749 | 0.335918404  | 1.262180643 | 1.707613263  | 0.148413002 | 0.684147739 |
| S12A5 | -0.286057945 | -0.374328733 | -0.088270788 | 0.940649535 | -0.743256846 | 0.490752533 | 0.902826709 | S12A5 | -0.286057945 | -0.473008516 | -0.18695057  | 0.878460566 | -1.693993258 | 0.151041901 | 0.687877575 |
| RTN1  | 0.195593066  | 0.220901321  | 0.025308255  | 1.017697116 | 0.634317284  | 0.553756962 | 0.918102039 | RTN1  | 0.195593066  | 0.277365852  | 0.081772786  | 1.058317704 | 1.676399009  | 0.154507063 | 0.690291938 |
| BSN   | 0.643549423  | 0.683014515  | 0.039465092  | 1.027732704 | 0.715437852  | 0.506347255 | 0.902826709 | BSN   | 0.643549423  | 0.718864126  | 0.075314703  | 1.053590836 | 1.672806181  | 0.155224378 | 0.690291938 |

|        |              |              |              |             |              |             |             |        |              |              |              |             |              |             |             |
|--------|--------------|--------------|--------------|-------------|--------------|-------------|-------------|--------|--------------|--------------|--------------|-------------|--------------|-------------|-------------|
| PRDX2  | 1.418776855  | 1.269378869  | -0.149397986 | 0.901626619 | -2.728326192 | 0.041362621 | 0.902826709 | PRDX2  | 1.418776855  | 1.293862042  | -0.124914813 | 0.917058191 | -1.658103046 | 0.158194673 | 0.69532077  |
| NRX1A  | -0.376196222 | -0.410663476 | -0.034467255 | 0.976392247 | -0.313972001 | 0.76621928  | 0.95198238  | NRX1A  | -0.376196222 | -0.206680389 | 0.169515833  | 1.124680979 | 1.637722971  | 0.162405604 | 0.70562435  |
| VAPA   | -0.10727132  | -0.022946228 | 0.084325092  | 1.060191656 | 0.983479113  | 0.370536145 | 0.902826709 | VAPA   | -0.10727132  | 0.129063808  | 0.236335127  | 1.177996398 | 1.624303633  | 0.165238877 | 0.709776087 |
| MK03   | 0.026667951  | 0.031749113  | 0.005081162  | 1.003528203 | 0.06171927   | 0.953177571 | 0.983039409 | MK03   | 0.026667951  | 0.163206868  | 0.136538917  | 1.09926477  | 1.611348594  | 0.168020531 | 0.71361529  |
| HOME1  | 0.165575884  | 0.098904085  | -0.066671799 | 0.954838207 | -0.779245494 | 0.471089591 | 0.902826709 | HOME1  | 0.165575884  | 0.070189817  | -0.095386067 | 0.936021733 | -1.572392943 | 0.176666136 | 0.724987434 |
| MAP1A  | 0.602533482  | 0.495084895  | -0.107448587 | 0.928228187 | -2.889887779 | 0.034191282 | 0.902826709 | MAP1A  | 0.602533482  | 0.513932483  | -0.088600998 | 0.94043426  | -1.570303691 | 0.177141968 | 0.724987434 |
| NFASC  | 1.371724317  | 1.248413331  | -0.123310986 | 0.918078241 | -0.998824774 | 0.363734118 | 0.902826709 | NFASC  | 1.371724317  | 1.254904226  | -0.116820091 | 0.922218114 | -1.56681192  | 0.177940033 | 0.724987434 |
| AAK1   | -0.49022844  | -0.531337472 | -0.041109031 | 0.971907534 | -1.282894753 | 0.255776505 | 0.902826709 | AAK1   | -0.49022844  | -0.569227964 | -0.078999523 | 0.946713944 | -1.564937371 | 0.178369924 | 0.724987434 |
| FSCN1  | 1.196955754  | 1.157550535  | -0.039405219 | 0.973056027 | -0.664389514 | 0.535849425 | 0.917701402 | FSCN1  | 1.196955754  | 1.050425791  | -0.146529963 | 0.903420801 | -1.543305555 | 0.183404847 | 0.732842816 |
| M2OM   | 0.002581121  | -0.000145883 | -0.002727004 | 0.99811157  | -0.199194925 | 0.851826044 | 0.978693753 | M2OM   | 0.002581121  | -0.069537757 | -0.072118878 | 0.951239891 | -1.596085079 | 0.185703644 | 0.732842816 |
| ODPB   | -0.387115571 | -0.445054428 | -0.057938857 | 0.960635576 | -1.219912075 | 0.27689436  | 0.902826709 | ODPB   | -0.387115571 | -0.551367411 | -0.16425184  | 0.89239118  | -1.520146288 | 0.188948877 | 0.732842816 |
| GNA13  | -0.618503296 | -0.377224302 | 0.241278995  | 1.182040113 | 1.779900485  | 0.135212251 | 0.902826709 | GNA13  | -0.618503296 | -0.894936888 | -0.276433592 | 0.82562949  | -1.519723905 | 0.189051487 | 0.732842816 |
| NCAM2  | 1.485621877  | 1.317193365  | -0.168428512 | 0.8898114   | -2.041442761 | 0.096690888 | 0.902826709 | NCAM2  | 1.485621877  | 1.630456015  | 0.144834137  | 1.105603538 | 1.51159775   | 0.19103615  | 0.732842816 |
| SEPT9  | 0.849694078  | 0.824264013  | -0.025430064 | 0.982527665 | -0.157055361 | 0.881346244 | 0.982274947 | SEPT9  | 0.849694078  | 0.650057513  | -0.199636564 | 0.870769895 | -1.507944222 | 0.191935023 | 0.732842816 |
| AKA12  | 1.322006392  | 1.144957823  | -0.177048569 | 0.884510657 | -0.896402755 | 0.411114777 | 0.902826709 | AKA12  | 1.322006392  | 1.023127918  | -0.298878474 | 0.812884073 | -1.498408841 | 0.194300326 | 0.734455231 |
| RAN    | -0.379899494 | -0.356720987 | 0.023178507  | 1.016195871 | 0.336484343  | 0.750168323 | 0.948822069 | RAN    | -0.379899494 | -0.44607654  | -0.066177046 | 0.955165712 | -1.470675576 | 0.201340685 | 0.740562603 |
| HSP7C  | -0.590861924 | -0.665715642 | -0.074853717 | 0.949438385 | -1.741973903 | 0.141983324 | 0.902826709 | HSP7C  | -0.590861924 | -0.640062378 | -0.049200454 | 0.966471802 | -1.469364174 | 0.201679605 | 0.740562603 |
| Q6FHZ0 | -0.561073793 | -0.505518155 | 0.055555638  | 1.039259285 | 0.92220118   | 0.398739023 | 0.902826709 | Q6FHZ0 | -0.561073793 | -0.681811008 | -0.120737215 | 0.919717556 | -1.468923894 | 0.201793513 | 0.740562603 |
| PSMD1  | 0.107089136  | 0.055316142  | -0.051772994 | 0.964749975 | -0.341196213 | 0.746826545 | 0.948822069 | PSMD1  | 0.107089136  | -0.121824783 | -0.228913918 | 0.853277009 | -1.449290599 | 0.206936205 | 0.746073263 |
| CTNA1  | -1.04597359  | -1.274294648 | -0.228321059 | 0.853627726 | -0.173957992 | 0.872974788 | 0.982274947 | CTNA1  | -1.04597359  | -1.186423082 | -0.140449492 | 0.907236449 | -1.83396664  | 0.208100669 | 0.746073263 |
| PRDX5  | -1.59478325  | -1.799707942 | -0.204924691 | 0.867583974 | -1.173273069 | 0.293530302 | 0.902826709 | PRDX5  | -1.59478325  | -1.743839001 | -0.149055751 | 0.901840528 | -1.440734766 | 0.209216312 | 0.746073263 |
| ATPB   | -0.421976232 | -0.53994855  | -0.117972319 | 0.921481867 | -1.731294399 | 0.143951082 | 0.902826709 | ATPB   | -0.421976232 | -0.505676239 | -0.083700007 | 0.943634449 | -1.422979181 | 0.214024798 | 0.746073932 |
| NOS1   | 1.097548435  | 0.894858935  | -0.2026895   | 0.868929178 | -2.074546118 | 0.092702279 | 0.902826709 | NOS1   | 1.097548435  | 0.929122139  | -0.168426296 | 0.889812767 | -1.422356054 | 0.214195445 | 0.746073932 |
| ROA2   | -0.398465857 | -0.223090535 | 0.175375322  | 1.129258147 | 2.876710824  | 0.034721222 | 0.902826709 | ROA2   | -0.398465857 | -0.258549741 | 0.139916116  | 1.101841048 | 1.41892376   | 0.215137721 | 0.746073932 |
| DAAM2  | -0.796965659 | -0.974134311 | -0.177168652 | 0.884437038 | -2.210244032 | 0.078080503 | 0.902826709 | DAAM2  | -0.796965659 | -0.885402273 | -0.088436614 | 0.940541421 | -1.39486295  | 0.221854341 | 0.755993233 |
| SEPT2  | 2.145820497  | 2.24402947   | 0.098208973  | 1.07044374  | 1.129160347  | 0.310073403 | 0.902826709 | SEPT2  | 2.145820497  | 2.231042273  | 0.085221776  | 1.060850807 | 1.394355841  | 0.221998013 | 0.755993233 |
| ARPC2  | -0.980797913 | -1.000976791 | -0.020178878 | 0.98611043  | -0.396382035 | 0.708174345 | 0.945900715 | ARPC2  | -0.980797913 | -0.884589337 | 0.096208576  | 1.068960524 | 1.362686678  | 0.231145916 | 0.780117468 |
| GFAP   | 3.736218364  | 4.097428451  | 0.361210087  | 1.284502846 | 0.867189177  | 0.425490361 | 0.902826709 | GFAP   | 3.736218364  | 4.133967522  | 0.397749157  | 1.317450866 | 1.340582829  | 0.237738822 | 0.787576509 |
| PP2BA  | -0.011051056 | 0.092593634  | 0.10364469   | 1.074484514 | 3.961398634  | 0.010727852 | 0.902826709 | PP2BA  | -0.011051056 | 0.058111023  | 0.069162078  | 1.049107182 | 1.340006204  | 0.237913136 | 0.787576509 |
| PTPRA  | -2.492189812 | -2.423463668 | 0.068726144  | 1.048790225 | 0.350192986  | 0.740463348 | 0.948822069 | PTPRA  | -2.492189812 | -2.307290827 | 0.184898984  | 1.136737378 | 1.334424622  | 0.23960661  | 0.787576509 |
| ANK2   | 0.553679536  | 0.509484448  | -0.044195088 | 0.969830756 | -0.870330262 | 0.423926222 | 0.902826709 | ANK2   | 0.553679536  | 0.451480137  | -0.102199399 | 0.93161166  | -1.319641748 | 0.244146031 | 0.790960532 |
| ITPR1  | -0.942228149 | -0.863754173 | 0.078473977  | 1.055900562 | 0.351886482  | 0.739268186 | 0.948822069 | ITPR1  | -0.942228149 | -0.612095803 | 0.330132346  | 1.257128693 | 1.31619483   | 0.245215881 | 0.790960532 |
| VISL1  | 1.345321706  | 1.312659451  | -0.032662255 | 0.977614606 | -0.470256036 | 0.657969761 | 0.930506741 | VISL1  | 1.345321706  | 1.247422491  | -0.097899215 | 0.93439262  | -1.310753424 | 0.246913605 | 0.790960532 |
| PP1B   | -0.820776159 | -1.033039434 | -0.212263274 | 0.863182024 | -1.453004556 | 0.205953854 | 0.902826709 | PP1B   | -0.820776159 | -0.666037404 | 0.154738755  | 1.113220017 | 1.299490378  | 0.250462209 | 0.791763777 |
| GRIA4  | 0.426398539  | 0.521364026  | 0.094965487  | 1.068039858 | 0.634285931  | 0.553775833 | 0.918102039 | GRIA4  | 0.426398539  | 0.764398707  | 0.338000168  | 1.264003245 | 1.296684331  | 0.25135358  | 0.791763777 |
| XPOT   | -0.161474025 | -0.302529028 | -0.141055003 | 0.906855755 | -1.41780286  | 0.215446296 | 0.902826709 | XPOT   | -0.161474025 | -0.27465947  | -0.113185445 | 0.924544429 | -1.245582674 | 0.268103259 | 0.831720701 |
| DYN3   | -0.156233513 | -0.130537107 | 0.025696406  | 1.01797096  | 0.075932226  | 0.942417623 | 0.983039409 | DYN3   | -0.156233513 | 0.126238938  | 0.282472451  | 1.216277522 | 1.239339391  | 0.270217797 | 0.831720701 |
| MTAP2  | 0.575728974  | 0.501700183  | -0.074028791 | 0.949981425 | -0.834429309 | 0.442068872 | 0.902826709 | MTAP2  | 0.575728974  | 0.503215013  | -0.072513961 | 0.950979429 | -1.23717053  | 0.270955892 | 0.831720701 |
| E41L1  | 0.506470731  | 0.681840081  | 0.175369349  | 1.129253472 | 1.210803271  | 0.280075595 | 0.902826709 | E41L1  | 0.506470731  | 0.642986832  | 0.136516101  | 1.099247385 | 1.231659458  | 0.272839595 | 0.831720701 |
| STX1B  | 0.734297808  | 0.768213405  | 0.033915596  | 1.023787003 | 0.407957408  | 0.700186709 | 0.941888171 | STX1B  | 0.734297808  | 0.661413957  | -0.072883851 | 0.95073564  | -1.217530442 | 0.277722993 | 0.83375233  |
| GLNA   | -1.018502268 | -0.687432531 | 0.331069737  | 1.257945777 | 2.519653412  | 0.05319716  | 0.902826709 | GLNA   | -1.018502268 | -0.838196641 | 0.180305627  | 1.133123906 | 1.216972484  | 0.277917443 | 0.83375233  |
| VPP1   | 0.205299206  | 0.12165125   | -0.083647955 | 0.943668496 | -3.134356342 | 0.025830179 | 0.902826709 | VPP1   | 0.205299206  | 0.253251211  | 0.047952005  | 1.033796344 | 1.204932076  | 0.282143432 | 0.839765489 |
| IDH3A  | -1.707243567 | -1.770157753 | -0.062914187 | 0.9573284   | -0.820051587 | 0.44949781  | 0.902826709 | IDH3A  | -1.707243567 | -1.81933308  | -0.112089513 | 0.925247019 | -1.193392684 | 0.286247434 | 0.841008304 |
| SHAN3  | 1.360245655  | 1.188437975  | -0.17180768  | 0.887729669 | -0.413076229 | 0.69666832  | 0.940502232 | SHAN3  | 1.360245655  | 1.034535459  | -0.325710196 | 0.797905504 | -1.179955163 | 0.291093487 | 0.841008304 |

|        |              |              |              |             |              |             |             |        |              |              |              |             |              |             |             |
|--------|--------------|--------------|--------------|-------------|--------------|-------------|-------------|--------|--------------|--------------|--------------|-------------|--------------|-------------|-------------|
| HPCA   | -1.613511985 | -1.573857181 | 0.039654804  | 1.027867858 | 0.85759594   | 0.430294982 | 0.902826709 | HPCA   | -1.613511985 | -1.487326085 | 0.1261859    | 1.091404502 | 1.179291116  | 0.291334845 | 0.841008304 |
| MPCP   | -0.157799688 | -0.161214242 | -0.003414555 | 0.99763601  | -0.047279029 | 0.964121167 | 0.984847936 | MPCP   | -0.157799688 | -0.28108385  | -0.123284162 | 0.918095311 | -1.178945459 | 0.29146055  | 0.841008304 |
| FLOT1  | 1.800328923  | 1.770704446  | -0.029624477 | 0.979675267 | -0.193074504 | 0.854498432 | 0.978789113 | FLOT1  | 1.800328923  | 2.106188535  | 0.305859612  | 1.236154965 | 1.167921584  | 0.29549488  | 0.846189883 |
| KAD4   | 0.468928111  | 0.363446252  | -0.105481859 | 0.92949444  | -1.260647182 | 0.263062717 | 0.902826709 | KAD4   | 0.468928111  | 0.335444379  | -0.133483732 | 0.911627448 | -1.161231336 | 0.297967265 | 0.846854331 |
| VPS35  | 0.286349202  | 0.415062584  | 0.128713381  | 1.093318227 | 0.470239715  | 0.657980644 | 0.930506741 | VPS35  | 0.286349202  | -0.034813847 | -0.32116305  | 0.800424344 | -1.13962298  | 0.306077473 | 0.855672214 |
| G6PI   | 0.111202577  | 0.082943433  | -0.028259144 | 0.980602848 | -0.283129172 | 0.788425742 | 0.959375921 | G6PI   | 0.111202577  | 0.180613078  | 0.0694105    | 1.049287847 | 1.1373768    | 0.30693153  | 0.855672214 |
| NCPR   | -2.044669818 | -1.709131133 | 0.335538686  | 1.261848481 | 1.525974851  | 0.187538439 | 0.902826709 | NCPR   | -2.044669818 | -1.705929598 | 0.33874022   | 1.264651801 | 1.12179966   | 0.312911812 | 0.855672214 |
| ANXA3  | 0.333429033  | 0.439565045  | 0.106136011  | 1.076341593 | 0.513315289  | 0.629599615 | 0.930506741 | ANXA3  | 0.333429033  | 0.79040872   | 0.456979686  | 1.372665103 | 1.118137518  | 0.314332396 | 0.855672214 |
| RTN4   | 1.096752875  | 1.090692623  | -0.006060252 | 0.995808164 | -0.159617129 | 0.879430281 | 0.982274947 | RTN4   | 1.096752875  | 1.068491126  | -0.028261749 | 0.980601077 | -1.117516967 | 0.314573669 | 0.855672214 |
| ACSL6  | -0.827252048 | -1.017352315 | -0.190100267 | 0.876544799 | -0.618111197 | 0.563566878 | 0.922200346 | ACSL6  | -0.827252048 | -1.073129264 | -0.245877216 | 0.843302879 | -1.111649016 | 0.316863101 | 0.855672214 |
| 3HIDH  | -1.044127405 | -1.027958186 | 0.016169219  | 1.01127069  | 0.120687705  | 0.908638271 | 0.982274947 | 3HIDH  | -1.044127405 | -1.171815255 | -0.12768785  | 0.915297186 | -1.1115148   | 0.316915635 | 0.855672214 |
| COF1   | -0.430823345 | -0.445310445 | -0.0144871   | 0.990008557 | -0.274036837 | 0.795017027 | 0.959375921 | COF1   | -0.430823345 | -0.378038609 | 0.052784736  | 1.037265155 | 1.098207421  | 0.322161856 | 0.858103189 |
| CPNE6  | -0.032623726 | -0.084021669 | -0.051397943 | 0.965000809 | -0.342070984 | 0.746206826 | 0.948822069 | CPNE6  | -0.032623726 | 0.151088472  | 0.183712199  | 1.135802663 | 1.097717996  | 0.322356224 | 0.858103189 |
| STIP1  | -0.186944509 | -0.283254032 | -0.096309524 | 0.935422786 | -1.106843646 | 0.318748691 | 0.902826709 | STIP1  | -0.186944509 | -0.299816722 | -0.112872214 | 0.924745184 | -1.083977221 | 0.32785449  | 0.863494918 |
| PSMD7  | -0.323493443 | -0.279477945 | 0.044015498  | 1.030979394 | 0.311299308  | 0.768133931 | 0.95198238  | PSMD7  | -0.323493443 | -0.401420098 | -0.077926655 | 0.947418235 | -1.075780898 | 0.331172317 | 0.863494918 |
| CH60   | 0.32397      | 0.290490203  | -0.033479796 | 0.977060772 | -0.605420055 | 0.571326093 | 0.922353168 | CH60   | 0.32397      | 0.233196034  | -0.090773965 | 0.939018857 | -1.07309151  | 0.332267199 | 0.863494918 |
| ADDA   | 1.678780038  | 1.535762599  | -0.143017439 | 0.905623036 | -2.60146941  | 0.048163794 | 0.902826709 | ADDA   | 1.678780038  | 1.61384423   | -0.064935808 | 0.955987853 | -1.064035567 | 0.335976698 | 0.863494918 |
| GCYB1  | 0.163836122  | 0.303265068  | 0.139428946  | 1.101469041 | 1.795627654  | 0.132501375 | 0.902826709 | GCYB1  | 0.163836122  | 0.255688072  | 0.09185195   | 1.065737364 | 1.061011048  | 0.337223424 | 0.863494918 |
| SNAA   | 0.176305033  | 0.109132337  | -0.067172696 | 0.954506749 | -0.741478173 | 0.491739337 | 0.902826709 | SNAA   | 0.176305033  | 0.091698063  | -0.08460697  | 0.943041411 | -1.058919284 | 0.338087957 | 0.863494918 |
| B7Z1I4 | -0.720049486 | -0.595314057 | 0.124735429  | 1.090307767 | 1.931187975  | 0.111320668 | 0.902826709 | B7Z1I4 | -0.720049486 | -0.627042077 | 0.093007409  | 1.066591258 | 1.041277514  | 0.345454285 | 0.87638738  |
| 1433Z  | -0.744012757 | -0.731822338 | 0.012190419  | 1.008485555 | 0.246751302  | 0.814911498 | 0.962614207 | 1433Z  | -0.744012757 | -0.701051433 | 0.042961324  | 1.030226335 | 1.017529831  | 0.35558294  | 0.87835903  |
| AT1B1  | -3.834357383 | -3.723851292 | 0.110506091  | 1.079606891 | 1.472861291  | 0.200777024 | 0.902826709 | AT1B1  | -3.834357383 | -3.759145342 | 0.075212042  | 1.053515866 | 1.017330676  | 0.35566892  | 0.87835903  |
| COR1A  | -0.129029992 | -0.191758236 | -0.062728245 | 0.957451793 | -0.607210118 | 0.586586821 | 0.922353168 | COR1A  | -0.129029992 | -0.104374812 | 0.024655179  | 1.017236532 | 1.190171389  | 0.356100202 | 0.87835903  |
| KCC2B  | -0.04084765  | -0.10156664  | -0.060718991 | 0.958786174 | -0.993307298 | 0.366167818 | 0.902826709 | KCC2B  | -0.04084765  | 0.049785067  | 0.090632717  | 1.064837081 | 1.015015469  | 0.356669723 | 0.87835903  |
| KPYM   | -1.295554204 | -1.263998432 | 0.031555772  | 1.022113758 | 0.781950049  | 0.469635351 | 0.902826709 | KPYM   | -1.295554204 | -1.343633058 | -0.048078854 | 0.967223462 | -1.009758451 | 0.358950895 | 0.87835903  |
| RAC1   | 0.040110264  | 0.080999786  | 0.040889522  | 1.028747926 | 1.554574886  | 0.180764762 | 0.902826709 | RAC1   | 0.040110264  | 0.127012677  | 0.086902413  | 1.062087342 | 0.990329109  | 0.367487034 | 0.87835903  |
| NEB1   | -0.42996849  | -0.206393332 | 0.223575158  | 1.167623504 | 0.897781354  | 0.410445885 | 0.902826709 | NEB1   | -0.42996849  | -0.745115827 | -0.315147337 | 0.803768901 | -0.979678561 | 0.372236805 | 0.87835903  |
| ALDOC  | 0.480282235  | 0.501170994  | 0.020888759  | 1.014584312 | 0.87536095   | 0.421430401 | 0.902826709 | ALDOC  | 0.480282235  | 0.51380645   | 0.033524215  | 1.023509303 | 0.977931965  | 0.373020509 | 0.87835903  |
| NMDE1  | -0.190035809 | 0.044813471  | 0.23484928   | 1.176783791 | 1.023448073  | 0.35303579  | 0.902826709 | NMDE1  | -0.190035809 | 0.013285135  | 0.203320944  | 1.151345593 | 0.973482633  | 0.375023038 | 0.87835903  |
| IMB1   | -0.31159431  | -0.31380095  | -0.00220664  | 0.998471643 | -0.030365511 | 0.976950348 | 0.98544248  | IMB1   | -0.31159431  | -0.415577613 | -0.103983303 | 0.930460426 | -0.965555602 | 0.378612527 | 0.87835903  |
| AT2B1  | 0.541649204  | 0.538510742  | -0.003138462 | 0.997826948 | -0.029481017 | 0.977621508 | 0.98544248  | AT2B1  | 0.541649204  | 0.639168775  | 0.09751957   | 1.069932342 | 0.964130032  | 0.379261006 | 0.87835903  |
| PTPRS  | -0.255206362 | -0.112483889 | 0.142722473  | 1.103986456 | 1.332858512  | 0.240083783 | 0.902826709 | PTPRS  | -0.255206362 | -0.3401928   | -0.084986437 | 0.942793399 | -0.961371453 | 0.380518422 | 0.87835903  |
| OTUB1  | -0.564703206 | -0.451897932 | 0.112805274  | 1.081328802 | 1.05346384   | 0.340351557 | 0.902826709 | OTUB1  | -0.564703206 | -0.457779106 | 0.1069241    | 1.076929718 | 0.959547599  | 0.381351628 | 0.87835903  |
| F8VWT9 | 0.224042952  | 0.244856015  | 0.020813063  | 1.014531081 | 0.273628911  | 0.795313204 | 0.959375921 | F8VWT9 | 0.224042952  | 0.164457661  | -0.059585291 | 0.959539904 | -0.959433321 | 0.381403884 | 0.87835903  |
| NCDN   | -0.271895435 | -0.281122257 | -0.009226822 | 0.993624863 | -0.074944775 | 0.943164755 | 0.983039409 | NCDN   | -0.271895435 | -0.390439444 | -0.118544009 | 0.921116788 | -0.956306911 | 0.382835748 | 0.87835903  |
| CNDP2  | 0.124779326  | 0.459106703  | 0.334327377  | 1.260789458 | 1.601377817  | 0.170192875 | 0.902826709 | CNDP2  | 0.124779326  | -0.158229821 | -0.283009148 | 0.821874976 | -0.951258676 | 0.385156971 | 0.87835903  |
| CACB3  | -0.370784951 | -0.639581461 | -0.26879651  | 0.830011649 | -2.095454881 | 0.090272495 | 0.902826709 | CACB3  | -0.370784951 | -0.179248381 | 0.19153657   | 1.141979355 | 0.949987262  | 0.385743367 | 0.87835903  |
| AIP    | 0.653603943  | 0.677408654  | 0.023804711  | 1.016637048 | 0.284948852  | 0.787108991 | 0.959375921 | AIP    | 0.653603943  | 0.808174217  | 0.154570274  | 1.11309002  | 0.944983699  | 0.38805809  | 0.87835903  |
| 1433E  | -0.04089512  | -0.073034813 | -0.032139693 | 0.977968774 | -0.391554778 | 0.71115181  | 0.946149117 | 1433E  | -0.04089512  | 0.041736     | 0.08263112   | 1.05894754  | 0.937320919  | 0.391624663 | 0.881155491 |
| AL3A1  | 1.124019186  | 1.221496767  | 0.097477581  | 1.069901203 | 0.732647065  | 0.496659649 | 0.902826709 | AL3A1  | 1.124019186  | 1.057858794  | -0.066160392 | 0.955176738 | -0.921861637 | 0.398899965 | 0.890277726 |
| DHE3   | -0.775523299 | -0.672939818 | 0.102583481  | 1.073694441 | 0.802265234  | 0.458816966 | 0.902826709 | DHE3   | -0.775523299 | -0.660324128 | 0.115199171  | 1.083124566 | 0.918724387  | 0.400389454 | 0.890277726 |
| AP1B1  | -0.054582012 | -0.041937643 | 0.012644369  | 1.008802929 | 0.559864466  | 0.599724885 | 0.922353168 | AP1B1  | -0.054582012 | -0.018780508 | 0.035801504  | 1.025126184 | 0.913595903  | 0.402833838 | 0.890474801 |
| UCHL1  | 0.769513108  | 0.766858176  | -0.002654932 | 0.998161434 | -0.043996741 | 0.966610011 | 0.984847936 | UCHL1  | 0.769513108  | 0.703200396  | -0.066312712 | 0.955075896 | -0.904777109 | 0.407064742 | 0.892759485 |
| RP3A   | 0.664726057  | 0.601691527  | -0.06303453  | 0.957248547 | -0.942960611 | 0.388997171 | 0.902826709 | RP3A   | 0.664726057  | 0.748300866  | 0.083574809  | 1.05964044  | 0.894877065  | 0.411856033 | 0.892759485 |



|        |              |              |              |             |              |             |             |        |              |              |              |             |              |             |             |
|--------|--------------|--------------|--------------|-------------|--------------|-------------|-------------|--------|--------------|--------------|--------------|-------------|--------------|-------------|-------------|
| AT1A3  | -1.525520075 | -1.599222751 | -0.073702677 | 0.950196188 | -0.794435082 | 0.462964748 | 0.902826709 | AT1A3  | -1.525520075 | -1.612084447 | -0.086564372 | 0.941762791 | -0.893776415 | 0.412391435 | 0.892759485 |
| AP2A1  | -0.179440499 | -0.332404309 | -0.15296381  | 0.899400874 | -0.722914488 | 0.502122317 | 0.902826709 | AP2A1  | -0.179440499 | -0.312892007 | -0.133451508 | 0.91164781  | -0.888645544 | 0.414894498 | 0.892759485 |
| SYT7   | -0.07848415  | 0.029952028  | 0.108436178  | 1.078059031 | 0.977705697  | 0.373122134 | 0.902826709 | SYT7   | -0.07848415  | 0.048117552  | 0.126601702  | 1.091719103 | 0.887047787  | 0.415676374 | 0.892759485 |
| EAA2   | 0.739020544  | 0.739199849  | 0.000179305  | 1.000124292 | 0.001901243  | 0.998556552 | 0.998556552 | EAA2   | 0.739020544  | 0.77276246   | 0.033741916  | 1.023663761 | 0.880094759  | 0.419092288 | 0.89501065  |
| CAPZB  | -1.209934653 | -1.161405317 | 0.048529335  | 1.034210126 | 0.618353676  | 0.563419285 | 0.922200346 | CAPZB  | -1.209934653 | -1.123598337 | 0.086336316  | 1.061670673 | 0.865491616  | 0.426337535 | 0.905368473 |
| CMC1   | -0.110417821 | -0.148274124 | -0.037856303 | 0.974101287 | -0.377599156 | 0.721226099 | 0.946609256 | CMC1   | -0.110417821 | -0.190886412 | -0.080468591 | 0.945750414 | -0.839249566 | 0.439599134 | 0.912217752 |
| MAP1B  | 0.898963305  | 0.74829969   | -0.150663615 | 0.900835998 | -1.353574279 | 0.233842907 | 0.902826709 | MAP1B  | 0.898963305  | 0.825150583  | -0.073812721 | 0.950123712 | -0.830796491 | 0.443937136 | 0.912217752 |
| KPCE   | -1.295228156 | -1.479595254 | -0.184367098 | 0.880035058 | -1.364259138 | 0.230683472 | 0.902826709 | KPCE   | -1.295228156 | -1.21902585  | 0.076202307  | 1.054239247 | 0.82782013   | 0.445472238 | 0.912217752 |
| SERA   | -0.365797369 | -0.237862997 | 0.127934372  | 1.09272803  | 1.142587201  | 0.304953581 | 0.902826709 | SERA   | -0.365797369 | -0.271774156 | 0.094023213  | 1.067342512 | 0.817503206  | 0.450824281 | 0.912217752 |
| GRP75  | 0.775054691  | 0.701403363  | -0.073651328 | 0.950230008 | -0.823891697 | 0.447504506 | 0.902826709 | GRP75  | 0.775054691  | 0.7089871    | -0.066067591 | 0.955238182 | -0.806158459 | 0.456764924 | 0.912217752 |
| PTPRZ  | 1.113270695  | 0.910174021  | -0.203096674 | 0.868683973 | -0.95704783  | 0.382496021 | 0.902826709 | PTPRZ  | 1.113270695  | 1.003893763  | -0.109376932 | 0.926988321 | -0.796896368 | 0.461657984 | 0.912217752 |
| ADHX   | 0.489750609  | 0.300757168  | -0.188993441 | 0.877217537 | -1.368999984 | 0.229294477 | 0.902826709 | ADHX   | 0.489750609  | 0.394467339  | -0.09528327  | 0.936088431 | -0.794887412 | 0.46272439  | 0.912217752 |
| NLGN2  | 0.05917053   | -0.173678757 | -0.232849288 | 0.85095262  | -0.897331274 | 0.410664169 | 0.902826709 | NLGN2  | 0.05917053   | 0.21589233   | 0.156721799  | 1.114751236 | 0.793975616  | 0.463208993 | 0.912217752 |
| VATC1  | -0.700325573 | -0.715903325 | -0.015577751 | 0.989260411 | -0.138089569 | 0.895558561 | 0.982274947 | VATC1  | -0.700325573 | -0.629203599 | 0.071121975  | 1.050533359 | 0.785644536  | 0.467654133 | 0.912217752 |
| IPO5   | -0.434072977 | -0.040507806 | 0.393565171  | 1.313635637 | 1.076004546  | 0.331081406 | 0.902826709 | IPO5   | -0.434072977 | -0.204166654 | 0.229906324  | 1.172758798 | 0.781103998  | 0.47008992  | 0.912217752 |
| RAB2A  | 0.151520128  | 0.148448359  | -0.003071769 | 0.997873077 | -0.091966471 | 0.930295694 | 0.983039409 | RAB2A  | 0.151520128  | 0.199272908  | 0.04775278   | 1.033653594 | 0.781083316  | 0.470101036 | 0.912217752 |
| Q6NVC0 | 4.122564126  | 3.984150961  | -0.138413164 | 0.908517895 | -1.215934109 | 0.278279646 | 0.902826709 | Q6NVC0 | 4.122564126  | 4.012221158  | -0.110342968 | 0.926367813 | -0.780204469 | 0.470573574 | 0.912217752 |
| TEBP   | 0.039118062  | -0.135758724 | -0.174876786 | 0.885843171 | -1.003267542 | 0.361784186 | 0.902826709 | TEBP   | 0.039118062  | 0.126363553  | 0.087245491  | 1.06233994  | 0.777061293  | 0.472266433 | 0.912217752 |
| PRS4   | -0.354306029 | -0.619393851 | -0.265087822 | 0.832148077 | -1.381651213 | 0.22562618  | 0.902826709 | PRS4   | -0.354306029 | -0.493495153 | -0.139189124 | 0.908029376 | -0.777000633 | 0.472299147 | 0.912217752 |
| DCTN2  | 0.046213537  | 0.033486988  | -0.012726549 | 0.991217423 | -0.125291676 | 0.905174411 | 0.982274947 | DCTN2  | 0.046213537  | 0.121081938  | 0.074868401  | 1.053264955 | 0.769400492  | 0.476410967 | 0.912217752 |
| TFR1   | 0.24461      | 0.180533922  | -0.064076078 | 0.956557714 | -1.821729763 | 0.12812369  | 0.902826709 | TFR1   | 0.24461      | 0.297934705  | 0.053324705  | 1.037653453 | 0.760586106  | 0.481212126 | 0.912217752 |
| IP3KA  | -0.6664016   | -0.427001091 | 0.239400508  | 1.180502018 | 1.260288852  | 0.263181606 | 0.902826709 | IP3KA  | -0.6664016   | -0.513379462 | 0.153022138  | 1.111896219 | 0.760133292  | 0.48145971  | 0.912217752 |
| 1433G  | 0.46132328   | 0.465083719  | 0.003760439  | 1.002609938 | 0.130900307  | 0.900957918 | 0.982274947 | 1433G  | 0.46132328   | 0.484090284  | 0.022767003  | 1.01590606  | 0.756834697  | 0.483266047 | 0.912217752 |
| HXK1   | 0.254597366  | 0.27637611   | 0.021778744  | 1.015210393 | 0.46335658   | 0.662578677 | 0.930506741 | HXK1   | 0.254597366  | 0.222060183  | -0.032537183 | 0.977699362 | -0.747932911 | 0.488164986 | 0.912217752 |
| SEPT5  | 0.637130954  | 0.625746724  | -0.01138423  | 0.992140105 | -0.058252885 | 0.955803622 | 0.983039409 | SEPT5  | 0.637130954  | 0.538604434  | -0.09852652  | 0.933986421 | -0.746777331 | 0.488803531 | 0.912217752 |
| HSP74  | -1.193025955 | -1.087729108 | 0.105296846  | 1.075715705 | 1.741431879  | 0.142082539 | 0.902826709 | HSP74  | -1.193025955 | -1.15692061  | 0.036105344  | 1.025342105 | 0.74020142   | 0.492448544 | 0.912217752 |
| SUCB1  | -0.20926906  | -0.137249083 | 0.072019977  | 1.051187464 | 1.166801472  | 0.295907551 | 0.902826709 | SUCB1  | -0.20926906  | -0.332126864 | -0.122857804 | 0.918366674 | -0.73790857  | 0.493723991 | 0.912217752 |
| DYN1   | 0.061060593  | 0.1028198    | 0.041759207  | 1.029368262 | 0.523642043  | 0.622899283 | 0.930506741 | DYN1   | 0.061060593  | -0.000436969 | -0.061497563 | 0.95826889  | -0.737323534 | 0.494049804 | 0.912217752 |
| CAP1   | -0.919177628 | -0.992186698 | -0.07300907  | 0.950653125 | -0.706330101 | 0.511527238 | 0.903538766 | CAP1   | -0.919177628 | -0.979060085 | -0.059882457 | 0.959342278 | -0.735322441 | 0.495165386 | 0.912217752 |
| GRM3   | -0.464968289 | -0.654575475 | -0.189607186 | 0.876844434 | -0.706595286 | 0.511375899 | 0.903538766 | GRM3   | -0.464968289 | -0.341334396 | 0.123633893  | 1.089475605 | 0.731181196  | 0.49747972  | 0.912217752 |
| SRCN1  | -0.594860858 | -0.269659877 | 0.325200981  | 1.252838959 | 0.952397233  | 0.384632461 | 0.902826709 | SRCN1  | -0.594860858 | -0.458447398 | 0.13641346   | 1.099169182 | 0.727338983  | 0.499633747 | 0.912217752 |
| MARK1  | -0.368869126 | -0.555175301 | -0.186306175 | 0.878853027 | -1.239777036 | 0.27006908  | 0.902826709 | MARK1  | -0.368869126 | -0.560078554 | -0.191209428 | 0.87587116  | -0.725834865 | 0.50047877  | 0.912217752 |
| SYGP1  | -0.151534854 | 0.135662927  | 0.287197781  | 1.220267787 | 2.458639545  | 0.057324354 | 0.902826709 | SYGP1  | -0.151534854 | 0.034755817  | 0.186290672  | 1.137834454 | 0.724385012  | 0.501294255 | 0.912217752 |
| GPDM   | -1.220620778 | -1.420229867 | -0.199609089 | 0.870786479 | -1.062756059 | 0.336503641 | 0.902826709 | GPDM   | -1.220620778 | -1.272428807 | -0.051808029 | 0.964726547 | -0.723532536 | 0.501774174 | 0.912217752 |
| TBA1A  | -0.235333349 | -0.222092504 | 0.013240845  | 1.0092201   | 0.503547392  | 0.635974722 | 0.930506741 | TBA1A  | -0.235333349 | -0.217438478 | 0.017894871  | 1.012481025 | 0.723200671  | 0.501961091 | 0.912217752 |
| GNAZ   | 0.368149989  | 0.101740113  | -0.266409876 | 0.831385865 | -1.49932414  | 0.194072063 | 0.902826709 | GNAZ   | 0.368149989  | 0.245773567  | -0.122376422 | 0.918673156 | -0.710785057 | 0.508988939 | 0.914503276 |
| AP180  | -0.181733958 | -0.110180412 | 0.071553547  | 1.050847666 | 0.945405138  | 0.387862696 | 0.902826709 | AP180  | -0.181733958 | -0.110980058 | 0.070753901  | 1.050265371 | 0.705957879  | 0.511739714 | 0.914503276 |
| 2AAA   | -0.587986451 | -0.645871526 | -0.057885075 | 0.960671388 | -1.374534353 | 0.241254603 | 0.902826709 | 2AAA   | -0.587986451 | -0.612092164 | -0.024105713 | 0.983430011 | -0.705332067 | 0.512097085 | 0.914503276 |
| COR1C  | -1.895583827 | -1.670348555 | 0.225235273  | 1.168967867 | 0.584554061  | 0.590229795 | 0.922353168 | COR1C  | -1.895583827 | -1.77140737  | 0.124176457  | 1.089885409 | 0.71685301   | 0.513094153 | 0.914503276 |
| CO3    | 0.282831856  | 0.312393852  | 0.029561996  | 1.020702193 | 0.559016318  | 0.600261586 | 0.922353168 | CO3    | 0.282831856  | 0.234313852  | -0.048518004 | 0.966929088 | -0.699709917 | 0.515315338 | 0.914503276 |
| MK01   | -0.074458327 | -0.14120157  | -0.066743243 | 0.954790924 | -0.335859872 | 0.750611682 | 0.948822069 | MK01   | -0.074458327 | 0.055922679  | 0.130381006  | 1.094582735 | 0.692375477  | 0.519534588 | 0.91768259  |
| FLOT2  | 0.604463503  | 0.572572238  | -0.031891265 | 0.978137192 | -0.075046623 | 0.943087691 | 0.983039409 | FLOT2  | 0.604463503  | 0.831563506  | 0.227100003  | 1.170479773 | 0.684838893  | 0.523894632 | 0.918839738 |
| RGS7   | 0.939227562  | 0.825983303  | -0.113244259 | 0.924506739 | -1.114198113 | 0.31586678  | 0.902826709 | RGS7   | 0.939227562  | 1.034993028  | 0.095765467  | 1.068632254 | 0.682846721  | 0.525051279 | 0.918839738 |
| CLH1   | -0.071769947 | -0.126482718 | -0.054712771 | 0.962786107 | -1.76492216  | 0.137846394 | 0.902826709 | CLH1   | -0.071769947 | -0.108376018 | -0.036606071 | 0.974945804 | -0.67704504  | 0.52842955  | 0.919433583 |

|       |              |              |              |             |              |             |             |       |              |              |              |             |              |             |             |
|-------|--------------|--------------|--------------|-------------|--------------|-------------|-------------|-------|--------------|--------------|--------------|-------------|--------------|-------------|-------------|
| GBRB3 | 0.403462685  | 0.630698815  | 0.22723613   | 1.170590219 | 0.727809956  | 0.499369358 | 0.902826709 | GBRB3 | 0.403462685  | 0.528205734  | 0.124743049  | 1.090313525 | 0.673919913  | 0.530255347 | 0.919433583 |
| GBRA1 | 1.076692655  | 0.974585875  | -0.10210678  | 0.93167147  | -0.448415674 | 0.672617359 | 0.930506741 | GBRA1 | 1.076692655  | 1.225099469  | 0.148406814  | 1.108344837 | 0.668908636  | 0.533191928 | 0.920303876 |
| UBE2N | -0.289475882 | -0.244581899 | 0.044893984  | 1.031607369 | 0.725250387  | 0.500807404 | 0.902826709 | UBE2N | -0.289475882 | -0.354854904 | -0.065379021 | 0.955694207 | -0.648861874 | 0.545047573 | 0.931922263 |
| GRM1  | -1.608017574 | -1.96946438  | -0.361446806 | 0.778383587 | -0.853114634 | 0.432553604 | 0.902826709 | GRM1  | -1.608017574 | -1.833050534 | -0.225032961 | 0.855575478 | -0.648362522 | 0.545345093 | 0.931922263 |
| PRS7  | -0.381097347 | -0.406396586 | -0.025299239 | 0.982616766 | -1.171575857 | 0.294152108 | 0.902826709 | PRS7  | -0.381097347 | -0.334382608 | 0.046714739  | 1.032910132 | 0.641960079  | 0.549169175 | 0.931922263 |
| GRM5  | -0.323217945 | -0.143576236 | 0.179641709  | 1.13260257  | 1.183768833  | 0.289710783 | 0.902826709 | GRM5  | -0.323217945 | -0.185834485 | 0.137383461  | 1.09990846  | 0.636193067  | 0.552628676 | 0.931922263 |
| DLGP1 | 1.474360674  | 1.301380151  | -0.172980524 | 0.88700828  | -0.486274099 | 0.647335927 | 0.930506741 | DLGP1 | 1.474360674  | 1.311754919  | -0.162605755 | 0.893409961 | -0.635481722 | 0.553056375 | 0.931922263 |
| DGKA  | -0.175770979 | -0.239406392 | -0.063635413 | 0.956849935 | -0.834046919 | 0.442265245 | 0.902826709 | DGKA  | -0.175770979 | -0.23920752  | -0.063436541 | 0.956981844 | -0.632725433 | 0.554715633 | 0.931922263 |
| C2C2L | -0.73809664  | -0.697894978 | 0.040201661  | 1.028257547 | 0.567752066  | 0.594747484 | 0.922353168 | C2C2L | -0.73809664  | -0.696379979 | 0.041716661  | 1.029337906 | 0.620923681  | 0.561856482 | 0.939742258 |
| KCC2A | 0.632904519  | 0.612769193  | -0.020135326 | 0.986140199 | -0.40366694  | 0.703142319 | 0.942509917 | KCC2A | 0.632904519  | 0.684758873  | 0.051854354  | 1.036596447 | 0.609388998  | 0.568892304 | 0.940253987 |
| KCNA1 | 0.08735103   | 0.332366863  | 0.245015833  | 1.185105777 | 0.830078722  | 0.44430697  | 0.902826709 | KCNA1 | 0.08735103   | -0.055812324 | -0.143163354 | 0.905531446 | -0.601537786 | 0.573713067 | 0.940253987 |
| SC6A1 | -0.277189061 | -0.208259822 | 0.068929239  | 1.048937878 | 0.619812779  | 0.562531674 | 0.922200346 | SC6A1 | -0.277189061 | -0.182300689 | 0.094888372  | 1.06798277  | 0.601462068  | 0.573759684 | 0.940253987 |
| DYHC1 | 0.045242359  | 0.095592845  | 0.050350486  | 1.03551646  | 0.826519092  | 0.446144523 | 0.902826709 | DYHC1 | 0.045242359  | 0.079769778  | 0.034527419  | 1.024221265 | 0.590749454  | 0.5803789   | 0.940253987 |
| AP3B2 | 0.068238042  | -0.136930395 | -0.205168436 | 0.867437407 | -1.424073973 | 0.213725294 | 0.902826709 | AP3B2 | 0.068238042  | 0.183538619  | 0.115300577  | 1.083200701 | 0.588512022  | 0.581767354 | 0.940253987 |
| CLAP2 | 0.171460711  | -0.152073112 | -0.323533823 | 0.799110091 | -1.402535063 | 0.219691404 | 0.902826709 | CLAP2 | 0.171460711  | 0.057449838  | -0.114010873 | 0.924015608 | -0.583782843 | 0.584708828 | 0.940253987 |
| ADDB  | 1.009040246  | 0.987517677  | -0.021522569 | 0.985192418 | -0.587831364 | 0.582190148 | 0.922353168 | ADDB  | 1.009040246  | 0.957170461  | -0.051869786 | 0.964685251 | -0.578193691 | 0.588196971 | 0.940253987 |
| AAKG2 | 0.555293712  | 0.644394807  | 0.089101095  | 1.063707208 | 1.144976312  | 0.304050376 | 0.902826709 | AAKG2 | 0.555293712  | 0.627020009  | 0.071726297  | 1.050973503 | 0.570494033  | 0.593023052 | 0.940253987 |
| SPTB1 | 0.645816048  | 0.698754834  | 0.052938787  | 1.03737592  | 0.469023087  | 0.658792131 | 0.930506741 | SPTB1 | 0.645816048  | 0.597299775  | -0.048516272 | 0.966930249 | -0.567108222 | 0.59515284  | 0.940253987 |
| SYN2  | 0.355085231  | 0.305369265  | -0.049715966 | 0.966126519 | -0.643545634 | 0.548220517 | 0.918102039 | SYN2  | 0.355085231  | 0.435258006  | 0.080172775  | 1.057144635 | 0.566456225  | 0.595563497 | 0.940253987 |
| SAR1B | 0.510999606  | 0.485290347  | -0.025709259 | 0.982337542 | -0.172726189 | 0.869640875 | 0.982274947 | SAR1B | 0.510999606  | 0.451434635  | -0.059564971 | 0.959553419 | -0.566352406 | 0.595628903 | 0.940253987 |
| CO2   | 0.01334442   | -0.248435652 | -0.261780072 | 0.83405818  | -1.874358992 | 0.119741118 | 0.902826709 | CO2   | 0.01334442   | -0.054125483 | -0.067469903 | 0.954310133 | -0.565506014 | 0.596162291 | 0.940253987 |
| VATD  | -0.436926409 | -0.401670404 | 0.035256005  | 1.024738646 | 0.38861201   | 0.713560122 | 0.946149117 | VATD  | -0.436926409 | -0.390422814 | 0.046503595  | 1.032758973 | 0.565176348  | 0.596370121 | 0.940253987 |
| ATLA1 | 1.065463019  | 0.921346469  | -0.14411655  | 0.904933354 | -1.100582642 | 0.321220005 | 0.902826709 | ATLA1 | 1.065463019  | 1.130979116  | 0.065516097  | 1.046459224 | 0.561003117  | 0.599004808 | 0.940253987 |
| VAT1L | -1.428191836 | -1.381364046 | 0.04682779   | 1.032991075 | 0.332451605  | 0.753033388 | 0.948822069 | VAT1L | -1.428191836 | -1.316978316 | 0.111213519  | 1.080136409 | 0.560260932  | 0.599474103 | 0.940253987 |
| RAB14 | 0.029905715  | 0.0443341    | 0.014428386  | 1.010051172 | 0.33721106   | 0.749652509 | 0.948822069 | RAB14 | 0.029905715  | -0.024455275 | -0.054360989 | 0.963020898 | -0.555344122 | 0.602588635 | 0.941233488 |
| ARC1A | -0.784531217 | -0.807522924 | -0.022991706 | 0.98418968  | -0.291760513 | 0.782187148 | 0.959375921 | ARC1A | -0.784531217 | -0.839976635 | -0.055445418 | 0.962297297 | -0.546908    | 0.607954865 | 0.945584791 |
| VINC  | -0.216855797 | -0.161409449 | 0.055446348  | 1.03918056  | 0.26518318   | 0.801453979 | 0.959375921 | VINC  | -0.216855797 | -0.355483797 | -0.138628    | 0.908382614 | -0.540697386 | 0.611923422 | 0.945584791 |
| STX1A | 1.632005348  | 1.782451759  | 0.150446411  | 1.109912858 | 2.694896281  | 0.043045862 | 0.902826709 | STX1A | 1.632005348  | 1.675931479  | 0.04392613   | 1.030915532 | 0.532154688  | 0.617406881 | 0.945584791 |
| SYT1  | 0.622611261  | 0.584629941  | -0.03798132  | 0.97401688  | -1.070265918 | 0.333420857 | 0.902826709 | SYT1  | 0.622611261  | 0.595932756  | -0.026678506 | 0.981677799 | -0.530474504 | 0.61848872  | 0.945584791 |
| RABE1 | -0.841491624 | -1.111523828 | -0.270032204 | 0.829301034 | -1.520196842 | 0.188936599 | 0.902826709 | RABE1 | -0.841491624 | -0.986389517 | -0.144897892 | 0.904443388 | -0.528627245 | 0.6196794   | 0.945584791 |
| VAPB  | 0.911218548  | 0.957861078  | 0.04664253   | 1.032858435 | 0.2569301    | 0.807470425 | 0.962614207 | VAPB  | 0.911218548  | 1.065613975  | 0.154395427  | 1.112955128 | 0.52753558   | 0.620383672 | 0.945584791 |
| CYFP1 | 0.105746486  | 0.203161989  | 0.097415504  | 1.069855167 | 0.774618888  | 0.473584929 | 0.902826709 | CYFP1 | 0.105746486  | 0.168041175  | 0.062294689  | 1.044125182 | 0.508969861  | 0.632431236 | 0.95376722  |
| LDHA  | -1.089560385 | -1.143638516 | -0.054078132 | 0.963209728 | -1.439157855 | 0.209639164 | 0.902826709 | LDHA  | -1.089560385 | -1.034940435 | 0.05461995   | 1.038585472 | 0.502934701  | 0.636375802 | 0.95376722  |
| DPYL1 | 0.567831653  | 0.565958279  | -0.001873374 | 0.998702319 | -0.048356967 | 0.963303904 | 0.984847936 | DPYL1 | 0.567831653  | 0.584943521  | 0.017111868  | 1.011931664 | 0.50226282   | 0.636815791 | 0.95376722  |
| RB39A | -0.496818807 | -0.433104732 | 0.063714074  | 1.045152942 | 0.635531558  | 0.553026404 | 0.918102039 | RB39A | -0.496818807 | -0.464882005 | 0.031936802  | 1.022383744 | 0.49801838   | 0.639599227 | 0.95376722  |
| PTPR2 | -0.103779069 | 0.079290891  | 0.183069959  | 1.135297154 | 1.137146819  | 0.307019092 | 0.902826709 | PTPR2 | -0.103779069 | 0.021053791  | 0.12483286   | 1.090381402 | 0.49604798   | 0.640893674 | 0.95376722  |
| ALDOA | -0.226428335 | -0.20619472  | 0.020233615  | 1.014123683 | 0.380325274  | 0.719324961 | 0.946609256 | ALDOA | -0.226428335 | -0.193912338 | 0.032515998  | 1.02279428  | 0.491701222  | 0.643754378 | 0.95376722  |
| NNTM  | 2.85451049   | 2.994137294  | 0.139626804  | 1.101620112 | 1.435141165  | 0.210719932 | 0.902826709 | NNTM  | 2.85451049   | 2.798501228  | -0.056009262 | 0.961921279 | -0.491401427 | 0.643951939 | 0.95376722  |
| ATPO  | -0.412818504 | -0.4226321   | -0.009813596 | 0.993220817 | -0.163583902 | 0.876465356 | 0.982274947 | ATPO  | -0.412818504 | -0.452738906 | -0.039920402 | 0.972708614 | -0.488391041 | 0.645937588 | 0.95376722  |
| RHG01 | 0.110233745  | -0.019333624 | -0.129567369 | 0.914105528 | -0.639805846 | 0.550459795 | 0.918102039 | RHG01 | 0.110233745  | -0.011050467 | -0.121284212 | 0.919368912 | -0.477161329 | 0.65337412  | 0.958743364 |
| ARP2  | -0.610899928 | -0.638293505 | -0.027393577 | 0.981191352 | -0.321464247 | 0.76086214  | 0.949228553 | ARP2  | -0.610899928 | -0.648514268 | -0.03761434  | 0.974264673 | -0.47564711  | 0.654380391 | 0.958743364 |
| ARPC3 | -0.660565047 | -0.667267229 | -0.006702182 | 0.995365176 | -0.146478214 | 0.889266549 | 0.982274947 | ARPC3 | -0.660565047 | -0.626831808 | 0.033733239  | 1.023657604 | 0.469199923  | 0.658674149 | 0.960251458 |
| AOFB  | 2.730538547  | 2.603624285  | -0.126914262 | 0.915788109 | -0.736867652 | 0.494303796 | 0.902826709 | AOFB  | 2.730538547  | 2.606810258  | -0.123728288 | 0.917812723 | -0.460139574 | 0.66473349  | 0.960251458 |
| SNAB  | 0.085055462  | 0.107736488  | 0.022681025  | 1.015845518 | 0.2805837    | 0.790269032 | 0.959375921 | SNAB  | 0.085055462  | 0.03153824   | -0.053517223 | 0.96358429  | -0.457408658 | 0.666565596 | 0.960251458 |

|        |              |              |              |             |              |             |             |        |              |              |              |             |              |             |             |
|--------|--------------|--------------|--------------|-------------|--------------|-------------|-------------|--------|--------------|--------------|--------------|-------------|--------------|-------------|-------------|
| GDIA   | 0.374635824  | 0.423345453  | 0.048709629  | 1.03433938  | 0.904384251  | 0.407254032 | 0.902826709 | GDIA   | 0.374635824  | 0.383336267  | 0.008700443  | 1.006048909 | 0.450733153  | 0.671055114 | 0.960251458 |
| RAB3A  | -0.083310184 | -0.150475648 | -0.067165464 | 0.954511534 | -1.708042018 | 0.148330994 | 0.902826709 | RAB3A  | -0.083310184 | -0.10987041  | -0.026560226 | 0.981758286 | -0.44663596  | 0.673818362 | 0.960251458 |
| SPTA1  | 0.845904753  | 0.645268273  | -0.20063648  | 0.870166584 | -2.741379866 | 0.040725197 | 0.902826709 | SPTA1  | 0.845904753  | 0.906973937  | 0.061069184  | 1.04323862  | 0.44579132   | 0.674388735 | 0.960251458 |
| CACB4  | -0.307502665 | -0.459044965 | -0.1515423   | 0.900287504 | -1.442087105 | 0.208854328 | 0.902826709 | CACB4  | -0.307502665 | -0.380382084 | -0.072879419 | 0.950738561 | -0.443721132 | 0.675787752 | 0.960251458 |
| NFL    | 1.498545076  | 1.568298777  | 0.069753701  | 1.04953749  | 0.361354419  | 0.732601768 | 0.948822069 | NFL    | 1.498545076  | 1.399137564  | -0.099407512 | 0.933416249 | -0.439470195 | 0.67866515  | 0.960251458 |
| EFHD2  | -1.019477286 | -1.108492027 | -0.089014741 | 0.940164596 | -0.60251373  | 0.57311243  | 0.922353168 | EFHD2  | -1.019477286 | -1.103818461 | -0.084341175 | 0.943215169 | -0.435886066 | 0.681096028 | 0.960251458 |
| GBRB1  | 0.281527835  | 0.296262108  | 0.014734273  | 1.010265351 | 0.134771451  | 0.898049794 | 0.982274947 | GBRB1  | 0.281527835  | 0.232370313  | -0.049157522 | 0.966500563 | -0.434985318 | 0.681707637 | 0.960251458 |
| KCRB   | -0.181450696 | -0.177953949 | 0.003496746  | 1.0024267   | 0.063090519  | 0.952138929 | 0.983039409 | KCRB   | -0.181450696 | -0.20899709  | -0.027546394 | 0.981087425 | -0.431322163 | 0.684197779 | 0.960251458 |
| SCOT1  | -0.977178562 | -0.949689445 | 0.027489117  | 1.01923669  | 0.236075142  | 0.822739989 | 0.96278586  | SCOT1  | -0.977178562 | -0.935466541 | 0.041712021  | 1.029334595 | 0.428830894  | 0.685893899 | 0.960251458 |
| C1TC   | -0.756915417 | -0.240580729 | 0.516334688  | 1.430316764 | 1.24525795   | 0.268212869 | 0.902826709 | C1TC   | -0.756915417 | -0.854993077 | -0.09807766  | 0.934277053 | -0.409440557 | 0.699166393 | 0.964868763 |
| SNP25  | 1.062127696  | 0.989351175  | -0.072776521 | 0.950806374 | -0.166753372 | 0.874098014 | 0.982274947 | SNP25  | 1.062127696  | 1.16193124   | 0.099803544  | 1.071627526 | 0.408074692  | 0.700105998 | 0.964868763 |
| CPNS1  | 0.173607181  | 0.14465263   | -0.028954551 | 0.980130292 | -0.524596719 | 0.622281927 | 0.930506741 | CPNS1  | 0.173607181  | 0.29698311   | 0.123375929  | 1.089280816 | 0.402994054  | 0.703606396 | 0.964868763 |
| Q6PJ43 | -0.21647919  | -0.199938294 | 0.016540895  | 1.011531253 | 0.582001868  | 0.585818937 | 0.922353168 | Q6PJ43 | -0.21647919  | -0.192773858 | 0.023705332  | 1.01656702  | 0.39476133   | 0.709296152 | 0.964868763 |
| ALDR   | 0.04682112   | 0.000547429  | -0.046273691 | 0.968434452 | -0.4488812   | 0.672303391 | 0.930506741 | ALDR   | 0.04682112   | 0.126256826  | 0.079435706  | 1.056604681 | 0.393847224  | 0.709929241 | 0.964868763 |
| STXB1  | 0.897692299  | 0.856455851  | -0.041236449 | 0.9718217   | -0.474078928 | 0.6554234   | 0.930506741 | STXB1  | 0.897692299  | 0.88140429   | -0.016288009 | 0.988773505 | -0.393717707 | 0.710018962 | 0.964868763 |
| NMDE2  | -0.323269363 | -0.274220514 | 0.049048848  | 1.034582611 | 0.207100471  | 0.844101576 | 0.975750445 | NMDE2  | -0.323269363 | -0.379836846 | -0.056567484 | 0.961549155 | -0.391049293 | 0.711868668 | 0.964868763 |
| PIPNB  | -1.379793907 | -1.294078195 | 0.085715712  | 1.061214072 | 0.948853417  | 0.386266923 | 0.902826709 | PIPNB  | -1.379793907 | -1.337358225 | 0.042435682  | 1.029851043 | 0.390573488  | 0.712198726 | 0.964868763 |
| ENOA   | -0.246780702 | -0.330832128 | -0.084051426 | 0.943404622 | -1.180815316 | 0.290781115 | 0.902826709 | ENOA   | -0.246780702 | -0.269135385 | -0.022354683 | 0.984624346 | -0.387246166 | 0.714508824 | 0.964868763 |
| TPIS   | 0.115703152  | 0.123079496  | 0.007376343  | 1.005125985 | 0.114572218  | 0.913242888 | 0.982274947 | TPIS   | 0.115703152  | 0.136571963  | 0.020868811  | 1.014570284 | 0.386945701  | 0.714717602 | 0.964868763 |
| GRP78  | -0.248057077 | -0.223751004 | 0.024306073  | 1.016990409 | 0.272806587  | 0.795910376 | 0.959375921 | GRP78  | -0.248057077 | -0.221338397 | 0.02671868   | 1.018692536 | 0.37800343   | 0.720944023 | 0.969810821 |
| SEPT8  | -0.081857021 | -0.058028957 | 0.023828064  | 1.016653505 | 0.241580595  | 0.818700025 | 0.96278586  | SEPT8  | -0.081857021 | -0.052875287 | 0.028981734  | 1.020291741 | 0.368340558  | 0.727699833 | 0.975427436 |
| KCC2D  | 0.448948905  | 0.328946253  | -0.120002652 | 0.920185959 | -1.492206576 | 0.195853926 | 0.902826709 | KCC2D  | 0.448948905  | 0.419744858  | -0.029204047 | 0.979960805 | -0.363138634 | 0.731348459 | 0.976350752 |
| AINX   | 1.762545451  | 1.84155794   | 0.079012489  | 1.056294769 | 0.431710219  | 0.683933769 | 0.936274417 | AINX   | 1.762545451  | 1.684927841  | -0.07761761  | 0.947621207 | -0.350062418 | 0.740555528 | 0.976350752 |
| CTNB1  | -0.357797241 | -0.368569518 | -0.010772277 | 0.992561034 | -0.104411852 | 0.920901514 | 0.983039409 | CTNB1  | -0.357797241 | -0.405771206 | -0.047973965 | 0.967293786 | -0.349974872 | 0.740617339 | 0.976350752 |
| NRX3A  | -0.515789155 | -0.516379663 | -0.000590509 | 0.999590774 | -0.002288399 | 0.998262618 | 0.998556552 | NRX3A  | -0.515789155 | -0.423324379 | 0.092464775  | 1.066190162 | 0.337851416  | 0.749198116 | 0.976350752 |
| GHC1   | -0.793715251 | -1.022003925 | -0.228288674 | 0.853646888 | -2.911428252 | 0.033344275 | 0.902826709 | GHC1   | -0.793715251 | -0.833359447 | -0.039644196 | 0.972894857 | -0.33285962  | 0.752743307 | 0.976350752 |
| GNAS2  | 0.44199419   | 0.669540633  | 0.227546442  | 1.170842032 | 0.984501454  | 0.37007976  | 0.902826709 | GNAS2  | 0.44199419   | 0.483939034  | 0.041944844  | 1.029500724 | 0.332576427  | 0.75294464  | 0.976350752 |
| KAP2   | -0.746692649 | -0.472536272 | 0.274156377  | 1.209286746 | 1.575309315  | 0.176004021 | 0.902826709 | KAP2   | -0.746692649 | -0.668198133 | 0.078494516  | 1.055915595 | 0.331973072  | 0.753373663 | 0.976350752 |
| NAC1   | -0.097874783 | -0.189550104 | -0.091675321 | 0.938432367 | -0.741435804 | 0.49176286  | 0.902826709 | NAC1   | -0.097874783 | -0.160436485 | -0.062561702 | 0.957562326 | -0.324530472 | 0.758674065 | 0.976350752 |
| MARE2  | 1.233767279  | 1.18090971   | -0.05285757  | 0.964024977 | -0.809068909 | 0.455235345 | 0.902826709 | MARE2  | 1.233767279  | 1.213250844  | -0.020516436 | 0.98587973  | -0.320673761 | 0.761426648 | 0.976350752 |
| AK1C1  | 1.046419591  | 1.148183598  | 0.101764007  | 1.073084739 | 0.535536551  | 0.615232694 | 0.926681406 | AK1C1  | 1.046419591  | 0.960725521  | -0.08569407  | 0.942331078 | -0.318210228 | 0.763187    | 0.976350752 |
| TAU    | 0.755130151  | 0.675508578  | -0.079621572 | 0.946305836 | -1.192209077 | 0.286671383 | 0.902826709 | TAU    | 0.755130151  | 0.774996395  | 0.019866244  | 1.013865477 | 0.317815817  | 0.763468983 | 0.976350752 |
| NCAN   | 1.557667942  | 0.979377221  | -0.578290721 | 0.669756823 | -2.701757106 | 0.042694338 | 0.902826709 | NCAN   | 1.557667942  | 1.449968314  | -0.107699628 | 0.928066682 | -0.316945954 | 0.764091037 | 0.976350752 |
| VATA   | -0.442174044 | -0.297305471 | 0.144868572  | 1.105629927 | 2.588214074  | 0.048942585 | 0.902826709 | VATA   | -0.442174044 | -0.454957575 | -0.012783532 | 0.991178273 | -0.312333024 | 0.767393179 | 0.976350752 |
| CPT1A  | 1.166972641  | 1.325695905  | 0.158723264  | 1.116298815 | 0.909169875  | 0.404952902 | 0.902826709 | CPT1A  | 1.166972641  | 1.108189351  | -0.05878329  | 0.960073465 | -0.310138812 | 0.768965866 | 0.976350752 |
| VATB2  | -0.487983277 | -0.479802317 | 0.00818096   | 1.005686718 | 0.247658478  | 0.814247406 | 0.962614207 | VATB2  | -0.487983277 | -0.498338963 | -0.010355686 | 0.992847686 | -0.306922621 | 0.771273326 | 0.976350752 |
| ARF1   | -0.174277297 | -0.147853271 | 0.026424026  | 1.018484501 | 1.355792077  | 0.233183811 | 0.902826709 | ARF1   | -0.174277297 | -0.185091257 | -0.010813959 | 0.992532357 | -0.302001689 | 0.77480904  | 0.976350752 |
| EF1A1  | -1.057948955 | -1.035676859 | 0.022272096  | 1.015557619 | 0.54567761   | 0.608739872 | 0.926681406 | EF1A1  | -1.057948955 | -1.076023894 | -0.018074939 | 0.987549563 | -0.29385253  | 0.780677841 | 0.976350752 |
| CBR1   | 1.560994107  | 1.129674868  | -0.431319239 | 0.741583351 | -1.938519368 | 0.110279832 | 0.902826709 | CBR1   | 1.560994107  | 1.65467706   | 0.093682953  | 1.067090808 | 0.287765497  | 0.78507241  | 0.976350752 |
| CALB1  | -3.639425809 | -3.673637229 | -0.03421142  | 0.976565407 | -0.337697876 | 0.749307057 | 0.948822069 | CALB1  | -3.639425809 | -3.568337993 | 0.071087816  | 1.050508486 | 0.285884168  | 0.786432493 | 0.976350752 |
| KAD1   | -1.366180911 | -1.261903646 | 0.104277266  | 1.074955744 | 0.637884693  | 0.551612442 | 0.918102039 | KAD1   | -1.366180911 | -1.347874656 | 0.018306255  | 1.012769775 | 0.284522259  | 0.787417608 | 0.976350752 |
| GRM2   | -0.322714314 | -0.099524841 | 0.223189473  | 1.167311398 | 1.05443777   | 0.339946511 | 0.902826709 | GRM2   | -0.322714314 | -0.194126227 | 0.128588087  | 1.09322328  | 0.283263067  | 0.788328826 | 0.976350752 |
| OGDHL  | -0.402094346 | -0.417923474 | -0.015829128 | 0.989088057 | -0.101145284 | 0.923365882 | 0.983039409 | OGDHL  | -0.402094346 | -0.462073131 | -0.059978785 | 0.959278225 | -0.281559025 | 0.789562571 | 0.976350752 |
| SDHB   | -0.78076249  | -0.645014458 | 0.135748032  | 1.098662318 | 1.19849112   | 0.28442764  | 0.902826709 | SDHB   | -0.78076249  | -0.795094785 | -0.014332296 | 0.990114793 | -0.277199249 | 0.792722273 | 0.976350752 |

|        |              |              |              |             |              |             |             |        |              |              |              |             |              |             |             |
|--------|--------------|--------------|--------------|-------------|--------------|-------------|-------------|--------|--------------|--------------|--------------|-------------|--------------|-------------|-------------|
| MYPR   | 1.14587274   | 1.236308976  | 0.090436237  | 1.064692071 | 0.485835203  | 0.647626045 | 0.930506741 | MYPR   | 1.14587274   | 1.067188879  | -0.078683861 | 0.946921108 | -0.275482204 | 0.793967926 | 0.976350752 |
| FARP2  | 1.231087663  | 1.323097772  | 0.092010109  | 1.065854205 | 0.428519788  | 0.686105856 | 0.936274417 | FARP2  | 1.231087663  | 1.151568137  | -0.079519526 | 0.946372774 | -0.272015134 | 0.796485278 | 0.976350752 |
| BAIP2  | -0.082513978 | -0.091376762 | -0.008862784 | 0.993875617 | -0.061328388 | 0.95347366  | 0.983039409 | BAIP2  | -0.082513978 | -0.132975315 | -0.050461337 | 0.965627497 | -0.271086191 | 0.797160239 | 0.976350752 |
| AP2A2  | 0.011903043  | 0.182889195  | 0.170986152  | 1.12582778  | 0.541462829  | 0.611433487 | 0.926681406 | AP2A2  | 0.011903043  | 0.094945571  | 0.083042528  | 1.059249559 | 0.267197555  | 0.799987857 | 0.976350752 |
| AAKG1  | -0.456370928 | -0.509693028 | -0.0533221   | 0.963714622 | -0.925339021 | 0.397254144 | 0.902826709 | AAKG1  | -0.456370928 | -0.478581319 | -0.022210391 | 0.984722829 | -0.265959631 | 0.800888744 | 0.976350752 |
| SEPT3  | 0.38801413   | 0.266348     | -0.12166613  | 0.919125564 | -1.604673831 | 0.16947172  | 0.902826709 | SEPT3  | 0.38801413   | 0.412812954  | 0.024798824  | 1.01733782  | 0.26265706   | 0.803293872 | 0.976350752 |
| DIRA2  | -0.293191225 | -0.201168205 | 0.09202302   | 1.065863743 | 1.942042107  | 0.109783303 | 0.902826709 | DIRA2  | -0.293191225 | -0.280505344 | 0.01268588   | 1.008831956 | 0.258820327  | 0.80609111  | 0.976610383 |
| SHLB2  | 0.263435125  | 0.56065042   | 0.297215296  | 1.228770338 | 2.389053157  | 0.062460853 | 0.902826709 | SHLB2  | 0.263435125  | 0.320199662  | 0.056764538  | 1.040130493 | 0.241446042  | 0.818798686 | 0.987619172 |
| SYN1   | 0.53361535   | 0.427821302  | -0.105794048 | 0.929293326 | -2.193233799 | 0.079770925 | 0.902826709 | SYN1   | 0.53361535   | 0.55517923   | 0.02156388   | 1.015059207 | 0.237996516  | 0.821329347 | 0.987619172 |
| 2ABA   | -1.370248939 | -1.179222387 | 0.191026552  | 1.141575717 | 1.53225959   | 0.186029077 | 0.902826709 | 2ABA   | -1.370248939 | -1.415845473 | -0.045596534 | 0.968889112 | -0.235471173 | 0.823183569 | 0.987619172 |
| PP2AA  | -0.50773158  | -0.569010548 | -0.061278968 | 0.958414096 | -0.952890134 | 0.384405571 | 0.902826709 | PP2AA  | -0.50773158  | -0.520844674 | -0.013113095 | 0.990951878 | -0.232143733 | 0.825628726 | 0.987619172 |
| PRS8   | -0.452794587 | -0.645327625 | -0.192533038 | 0.875067955 | -1.092403131 | 0.324473456 | 0.902826709 | PRS8   | -0.452794587 | -0.504422229 | -0.051627642 | 0.964847178 | -0.217330121 | 0.83654126  | 0.992907726 |
| DCE1   | -1.668138328 | -1.886000909 | -0.217862581 | 0.859838383 | -0.816526761 | 0.451333312 | 0.902826709 | DCE1   | -1.668138328 | -1.706889973 | -0.038751645 | 0.973496944 | -0.213587506 | 0.839305005 | 0.992907726 |
| RALA   | 0.108908607  | 0.060368435  | -0.048540172 | 0.966914231 | -0.461449382 | 0.663855711 | 0.930506741 | RALA   | 0.108908607  | 0.096695735  | -0.012212872 | 0.991570412 | -0.202261994 | 0.847684196 | 0.992907726 |
| ACTN4  | 2.076210634  | 1.921317158  | -0.154893476 | 0.898198691 | -1.298074152 | 0.250911724 | 0.902826709 | ACTN4  | 2.076210634  | 2.046925623  | -0.029285011 | 0.979905811 | -0.198773296 | 0.850269978 | 0.992907726 |
| L1CAM  | -0.121682267 | 0.0340177    | 0.155699968  | 1.11396196  | 0.761324914  | 0.480808365 | 0.902826709 | L1CAM  | -0.121682267 | -0.079513309 | 0.042168958  | 1.029660663 | 0.192811894  | 0.854693421 | 0.992907726 |
| HOME2  | 0.44543948   | 0.627601622  | 0.182162142  | 1.134582992 | 1.099500812  | 0.32164869  | 0.902826709 | HOME2  | 0.44543948   | 0.486391599  | 0.040952119  | 1.028792563 | 0.186692841  | 0.859240146 | 0.992907726 |
| SYT2   | 0.503823794  | 0.476243894  | -0.0275799   | 0.98106464  | -0.56788673  | 0.594662723 | 0.922353168 | SYT2   | 0.503823794  | 0.494262266  | -0.009561528 | 0.993394368 | -0.186408615 | 0.85945149  | 0.992907726 |
| COPG1  | -0.672159307 | -0.536707679 | 0.135451629  | 1.09843662  | 1.404487574  | 0.219144138 | 0.902826709 | COPG1  | -0.672159307 | -0.660887017 | 0.01127229   | 1.00784396  | 0.185838263  | 0.859875631 | 0.992907726 |
| PRDX1  | -0.950115954 | -0.945447817 | 0.004668138  | 1.003240947 | 0.032992221  | 0.974957316 | 0.98544248  | PRDX1  | -0.950115954 | -0.922654729 | 0.027461226  | 1.019216985 | 0.183007407  | 0.861981585 | 0.992907726 |
| TBB5   | 0.336547224  | 0.29883214   | -0.037715084 | 0.974196643 | -0.719681838 | 0.503946008 | 0.902826709 | TBB5   | 0.336547224  | 0.329040404  | -0.00750682  | 0.994810183 | -0.179117439 | 0.86487756  | 0.992907726 |
| RHG35  | 0.82781301   | 0.977145431  | 0.149332421  | 1.109056159 | 0.8346089    | 0.441976668 | 0.902826709 | RHG35  | 0.82781301   | 0.785180976  | -0.042632034 | 0.970882066 | -0.172991266 | 0.869443189 | 0.992907726 |
| CUL3   | 0.179706106  | 0.258180717  | 0.078474612  | 1.055901026 | 1.064509753  | 0.335781591 | 0.902826709 | CUL3   | 0.179706106  | 0.15609145   | -0.023614656 | 0.983764803 | -0.170726878 | 0.871132234 | 0.992907726 |
| CNTN1  | 0.887863012  | 0.869850258  | -0.018012753 | 0.987592131 | -0.333454781 | 0.752320256 | 0.948822069 | CNTN1  | 0.887863012  | 0.900061851  | 0.01219884   | 1.008491441 | 0.170671079  | 0.871173865 | 0.992907726 |
| VGLU1  | -0.075970089 | -0.044317352 | 0.031652738  | 1.022182458 | 0.600907263  | 0.574101328 | 0.922353168 | VGLU1  | -0.075970089 | -0.04966495  | 0.02630514   | 1.018400576 | 0.168193968  | 0.873022495 | 0.992907726 |
| VP26B  | 0.100571788  | 0.075841984  | -0.024729804 | 0.983004684 | -0.139514743 | 0.894488962 | 0.982274947 | VP26B  | 0.100571788  | 0.146309789  | 0.045738002  | 1.032211065 | 0.163512464  | 0.876518731 | 0.992907726 |
| NBEA   | -1.307102663 | -1.080154666 | 0.226947997  | 1.170356454 | 1.108051157  | 0.318273963 | 0.902826709 | NBEA   | -1.307102663 | -1.349627744 | -0.042525081 | 0.970954044 | -0.160021866 | 0.87912766  | 0.992907726 |
| G3P    | -0.390918262 | -0.358124341 | 0.032793921  | 1.022991332 | 0.928249534  | 0.395880783 | 0.902826709 | G3P    | -0.390918262 | -0.382324962 | 0.0085933    | 1.005974197 | 0.151953374  | 0.885164781 | 0.992907726 |
| CAP2   | 1.326818562  | 1.384297205  | 0.057478643  | 1.040645464 | 0.441994159  | 0.676955962 | 0.930506741 | CAP2   | 1.326818562  | 1.3087619    | -0.018056663 | 0.987562074 | -0.144535439 | 0.89072295  | 0.992907726 |
| HUWE1  | 0.245326254  | 0.192714387  | -0.052611867 | 0.964189172 | -0.918578747 | 0.400458707 | 0.902826709 | HUWE1  | 0.245326254  | 0.234945096  | -0.010381159 | 0.992830156 | -0.144466754 | 0.890774449 | 0.992907726 |
| GEPH   | -0.631643395 | -0.736377849 | -0.104734454 | 0.929976101 | -0.858448916 | 0.429866101 | 0.902826709 | GEPH   | -0.631643395 | -0.653756809 | -0.022113414 | 0.984789023 | -0.136454173 | 0.896786243 | 0.992907726 |
| E41L3  | 0.945980971  | 1.156459445  | 0.210478474  | 1.157071867 | 1.302042385  | 0.249654064 | 0.902826709 | E41L3  | 0.945980971  | 0.969800968  | 0.023819997  | 1.01664782  | 0.135003935  | 0.897875201 | 0.992907726 |
| CN37   | 1.764296981  | 1.68807217   | -0.076224811 | 0.948536496 | -0.692778257 | 0.519302271 | 0.909986598 | CN37   | 1.764296981  | 1.738024377  | -0.026272604 | 0.981954033 | -0.133871411 | 0.898725772 | 0.992907726 |
| GDAP1  | 1.027544496  | 1.08716038   | 0.059615885  | 1.042188243 | 0.264990004  | 0.801594626 | 0.959375921 | GDAP1  | 1.027544496  | 1.092999711  | 0.065455216  | 1.046415065 | 0.133276832  | 0.899172386 | 0.992907726 |
| ACTZ   | -1.296525618 | -1.263332447 | 0.033193171  | 1.023274473 | 0.716399939  | 0.505802209 | 0.902826709 | ACTZ   | -1.296525618 | -1.29107844  | 0.005447178  | 1.003782833 | 0.132371965  | 0.899852152 | 0.992907726 |
| GSTM3  | 0.421809563  | 0.242837197  | -0.178972365 | 0.883331972 | -1.090014957 | 0.325428696 | 0.902826709 | GSTM3  | 0.421809563  | 0.389668258  | -0.032141305 | 0.977967682 | -0.130896065 | 0.900961106 | 0.992907726 |
| NTRK2  | -0.146474029 | 0.083125945  | 0.229599973  | 1.172509794 | 1.226596644  | 0.274580488 | 0.902826709 | NTRK2  | -0.146474029 | -0.129390285 | 0.017083744  | 1.011911938 | 0.130429211  | 0.901311942 | 0.992907726 |
| RUFY3  | 0.237350207  | 0.30885101   | 0.071500803  | 1.050809248 | 0.466897846  | 0.660210938 | 0.930506741 | RUFY3  | 0.237350207  | 0.253605729  | 0.016255521  | 1.011331186 | 0.127559977  | 0.903468697 | 0.992907726 |
| B4DV12 | -0.056893294 | 0.004999749  | 0.061893043  | 1.043834538 | 1.423312208  | 0.213933649 | 0.902826709 | B4DV12 | -0.056893294 | -0.063444631 | -0.006551338 | 0.995469254 | -0.124711149 | 0.905611048 | 0.992907726 |
| GRIA1  | -0.950891526 | -1.139598208 | -0.188706682 | 0.877391916 | -0.591048963 | 0.580193194 | 0.922353168 | GRIA1  | -0.950891526 | -0.9863052   | -0.035413674 | 0.975751936 | -0.117743491 | 0.910854603 | 0.992907726 |
| SYNJ1  | -0.551402979 | -0.399770894 | 0.151632084  | 1.11082541  | 1.679328526  | 0.153924631 | 0.902826709 | SYNJ1  | -0.551402979 | -0.542500904 | 0.008902075  | 1.006189524 | 0.109903483  | 0.916760794 | 0.992907726 |
| EPN1   | 0.336797194  | 0.320264146  | -0.016533047 | 0.988605579 | -0.148872942 | 0.887472024 | 0.982274947 | EPN1   | 0.336797194  | 0.347146795  | 0.010349601  | 1.00719959  | 0.109697637  | 0.916915949 | 0.992907726 |
| PYGB   | 0.446866709  | 0.534137143  | 0.087270434  | 1.062358307 | 1.379807444  | 0.226157337 | 0.902826709 | PYGB   | 0.446866709  | 0.458800576  | 0.011933867  | 1.008306233 | 0.105546601  | 0.920045669 | 0.992907726 |
| NFM    | 1.256281556  | 1.419379064  | 0.163097508  | 1.119688563 | 0.865816241  | 0.426175429 | 0.902826709 | NFM    | 1.256281556  | 1.234853269  | -0.021428287 | 0.985256804 | -0.097566606 | 0.926066832 | 0.992907726 |

|       |              |              |              |             |              |             |             |       |              |              |              |             |              |             |             |
|-------|--------------|--------------|--------------|-------------|--------------|-------------|-------------|-------|--------------|--------------|--------------|-------------|--------------|-------------|-------------|
| GRIA2 | 0.36292353   | 0.268796436  | -0.094127094 | 0.936838913 | -0.79933869  | 0.460363983 | 0.902826709 | GRIA2 | 0.36292353   | 0.375512562  | 0.012589032  | 1.008764235 | 0.097523063  | 0.926099702 | 0.992907726 |
| SRC   | -0.192303401 | -0.166806983 | 0.025496418  | 1.017829857 | 0.358270544  | 0.734770243 | 0.948822069 | SRC   | -0.192303401 | -0.186241084 | 0.006062317  | 1.004210919 | 0.090663719  | 0.931279829 | 0.992907726 |
| PSD11 | -0.407912117 | -0.318253759 | 0.089658358  | 1.064118161 | 0.985399291  | 0.369679335 | 0.902826709 | PSD11 | -0.407912117 | -0.398544874 | 0.009367243  | 1.006514003 | 0.084820613  | 0.935695557 | 0.992907726 |
| USO1  | 0.142885746  | 0.286484537  | 0.143598791  | 1.104657241 | 0.650150041  | 0.544280562 | 0.918102039 | USO1  | 0.142885746  | 0.168145794  | 0.025260048  | 1.017663111 | 0.078974613  | 0.940116098 | 0.992907726 |
| MBP   | 0.53938497   | 0.690027085  | 0.150642116  | 1.11006343  | 0.590866879  | 0.580306088 | 0.922353168 | MBP   | 0.53938497   | 0.566172629  | 0.026787659  | 1.018741244 | 0.075909129  | 0.942435099 | 0.992907726 |
| PPIA  | -0.57568248  | -0.579207437 | -0.003524957 | 0.997559669 | -0.056630299 | 0.957033075 | 0.983039409 | PPIA  | -0.57568248  | -0.579842764 | -0.004160284 | 0.997120465 | -0.074208721 | 0.943721716 | 0.992907726 |
| HPCL1 | 0.738710905  | 0.665165051  | -0.073545854 | 0.950299481 | -0.907168614 | 0.405913942 | 0.902826709 | HPCL1 | 0.738710905  | 0.748526099  | 0.009815194  | 1.00682657  | 0.073091261  | 0.944567352 | 0.992907726 |
| DCLK1 | 0.226123197  | 0.177003084  | -0.049120113 | 0.966525625 | -0.444131443 | 0.675510349 | 0.930506741 | DCLK1 | 0.226123197  | 0.236087979  | 0.009964782  | 1.006930969 | 0.071819066  | 0.945530184 | 0.992907726 |
| CDK5  | -0.167852819 | -0.330491052 | -0.162638233 | 0.893389848 | -1.286950432 | 0.254468312 | 0.902826709 | CDK5  | -0.167852819 | -0.156869001 | 0.010983817  | 1.007642458 | 0.071303712  | 0.945920247 | 0.992907726 |
| PRS6A | -0.655152497 | -0.753861834 | -0.098709337 | 0.933868074 | -0.444621468 | 0.675179129 | 0.930506741 | PRS6A | -0.655152497 | -0.67226482  | -0.017112323 | 0.98820871  | -0.066039361 | 0.94990572  | 0.992907726 |
| SEP11 | 0.787356807  | 0.919212352  | 0.131855545  | 1.09570205  | 0.538070949  | 0.613606264 | 0.926681406 | SEP11 | 0.787356807  | 0.7785124    | -0.008844407 | 0.993888277 | -0.060544346 | 0.954067592 | 0.992907726 |
| EGFR  | 0.62313172   | 0.574029164  | -0.049102556 | 0.966537387 | -1.408687674 | 0.217971268 | 0.902826709 | EGFR  | 0.62313172   | 0.620824745  | -0.002306975 | 0.998402204 | -0.059385071 | 0.954945833 | 0.992907726 |
| SEPT4 | 0.558567029  | 0.458398194  | -0.100168835 | 0.932923808 | -0.683267063 | 0.524807086 | 0.909986598 | SEPT4 | 0.558567029  | 0.563519355  | 0.004952326  | 1.003438589 | 0.058568518  | 0.955564478 | 0.992907726 |
| DPYL2 | 0.734758956  | 0.726477676  | -0.00828128  | 0.994276297 | -0.23644341  | 0.822469553 | 0.96278586  | DPYL2 | 0.734758956  | 0.731964624  | -0.002794333 | 0.998064991 | -0.055004127 | 0.958265381 | 0.992907726 |
| SH3G2 | 0.08000135   | 0.172622405  | 0.092621056  | 1.066305664 | 1.090232833  | 0.325341448 | 0.902826709 | SH3G2 | 0.08000135   | 0.084500078  | 0.004498728  | 1.003123148 | 0.053122496  | 0.959691438 | 0.992907726 |
| CAD10 | 0.839003154  | 0.831047962  | -0.007955192 | 0.994501056 | -0.079026299 | 0.940077003 | 0.983039409 | CAD10 | 0.839003154  | 0.833788855  | -0.005214299 | 0.996392247 | -0.048697064 | 0.963046063 | 0.992907726 |
| CAND1 | -0.019497018 | 0.03743435   | 0.056931367  | 1.040250778 | 0.455237875  | 0.668023804 | 0.930506741 | CAND1 | -0.019497018 | -0.023185855 | -0.003688838 | 0.997446359 | -0.042122258 | 0.968031561 | 0.992907726 |
| TBB2A | 0.277491373  | 0.257108444  | -0.02038293  | 0.985970967 | -0.277487467 | 0.792513249 | 0.959375921 | TBB2A | 0.277491373  | 0.280714249  | 0.003222876  | 1.002236424 | 0.041962149  | 0.96815299  | 0.992907726 |
| RHOB  | 0.513903803  | 0.538828694  | 0.024924891  | 1.017426722 | 0.26440863   | 0.802017966 | 0.959375921 | RHOB  | 0.513903803  | 0.516394499  | 0.002490696  | 1.00172791  | 0.037735633  | 0.971358759 | 0.992907726 |
| SDHA  | -0.85527171  | -0.796920235 | 0.058351475  | 1.041275246 | 0.51152128   | 0.630767779 | 0.930506741 | SDHA  | -0.85527171  | -0.851076428 | 0.004195282  | 1.00291218  | 0.036944268  | 0.971959071 | 0.992907726 |
| COPA  | -0.472214286 | -0.43827702  | 0.033937266  | 1.023802381 | 0.167197643  | 0.873766297 | 0.982274947 | COPA  | -0.472214286 | -0.484023889 | -0.011809602 | 0.99184762  | -0.031269878 | 0.976264132 | 0.992907726 |
| NCAM1 | 0.432902462  | 0.429451788  | -0.003450674 | 0.997611033 | -0.058799976 | 0.955389115 | 0.983039409 | NCAM1 | 0.432902462  | 0.435747925  | 0.002845463  | 1.001974271 | 0.029622088  | 0.977514461 | 0.992907726 |
| NDUAA | 1.224697934  | 1.23782359   | 0.013125656  | 1.009139524 | 0.140566707  | 0.893699621 | 0.982274947 | NDUAA | 1.224697934  | 1.227773833  | 0.003075899  | 1.002134325 | 0.027585714  | 0.979059744 | 0.992907726 |
| AP2M1 | -0.130561631 | -0.120237989 | 0.010323643  | 1.007181468 | 0.130759505  | 0.901063726 | 0.982274947 | AP2M1 | -0.130561631 | -0.129230174 | 0.001331458  | 1.000923322 | 0.026421187  | 0.979943482 | 0.992907726 |
| ABR   | -0.037379061 | 0.095336881  | 0.132715942  | 1.096355701 | 0.803521855  | 0.45815388  | 0.902826709 | ABR   | -0.037379061 | -0.031818813 | 0.005560248  | 1.003861507 | 0.019100067  | 0.985500032 | 0.992907726 |
| UBA1  | -0.741347007 | -0.73653775  | 0.004809257  | 1.003339086 | 0.070409198  | 0.946597332 | 0.983039409 | UBA1  | -0.741347007 | -0.742819877 | -0.00147287  | 0.998979606 | -0.017625726 | 0.986619144 | 0.992907726 |
| GSH1  | 0.344841168  | 0.283309708  | -0.06153146  | 0.958246375 | -0.225742229 | 0.830339128 | 0.96278586  | GSH1  | 0.344841168  | 0.348812402  | 0.003971234  | 1.002756442 | 0.015006764  | 0.988607177 | 0.992907726 |
| KALRN | -0.062508569 | -0.105120498 | -0.042611928 | 0.970895597 | -0.118285722 | 0.911543355 | 0.982274947 | KALRN | -0.062508569 | -0.090148909 | -0.02764034  | 0.98102354  | 0.01322177   | 0.990280986 | 0.992907726 |
| NSF   | 0.424775765  | 0.548987206  | 0.124211441  | 1.089911838 | 1.400586752  | 0.22023878  | 0.902826709 | NSF   | 0.424775765  | 0.425016641  | 0.000240876  | 1.000166977 | 0.003299432  | 0.997495032 | 0.997495032 |

Reports the summary statistics for differences between the vehicle and haloperidol and vehicle and olanzapine groups.

**eTable 6. Monkey APD Synaptosome**

| Haloperidol |              |              |              |             |              |             |             | Olanzapine |              |              |              |             |              |             |             |
|-------------|--------------|--------------|--------------|-------------|--------------|-------------|-------------|------------|--------------|--------------|--------------|-------------|--------------|-------------|-------------|
| ProName     | control.ave  | sz.ave       | diff         | FoldChange  | statistic    | pvalue      | qvalue      | ProName    | control.ave  | sz.ave       | diff         | FoldChange  | statistic    | pvalue      | qvalue      |
| 1433E       | -1.385079198 | -1.341889499 | 0.043189699  | 1.03038943  | 2.795643776  | 0.038189475 | 0.599268681 | 1433E      | -1.385079198 | -1.344924682 | 0.040154516  | 1.028223946 | 1.400908814  | 0.220148208 | 0.701104385 |
| 1433G       | -1.181604212 | -1.157377243 | 0.02422697   | 1.016934648 | 0.765650022  | 0.478449581 | 0.787665904 | 1433G      | -1.181604212 | -1.08781102  | 0.093793192  | 1.06717235  | 5.045427047  | 0.003948611 | 0.543407796 |
| 1433T       | -1.51909871  | -1.545534576 | -0.026435867 | 0.981842916 | -0.513770584 | 0.629303345 | 0.856488668 | 1433T      | -1.51909871  | -1.496937499 | 0.022161211  | 1.015479567 | 0.679254815  | 0.52714109  | 0.840204914 |
| 1433Z       | -1.823017184 | -1.772300901 | 0.050716283  | 1.035779049 | 1.690709078  | 0.15168276  | 0.599268681 | 1433Z      | -1.823017184 | -1.766563492 | 0.056453692  | 1.039906409 | 2.268994023  | 0.072530093 | 0.701104385 |
| 2A5D        | -0.06563952  | -0.244883321 | -0.179243801 | 0.883165793 | -2.017078355 | 0.099741338 | 0.599268681 | 2A5D       | -0.06563952  | -0.226666035 | -0.161026515 | 0.894388464 | -1.580149763 | 0.174910446 | 0.701104385 |
| 2AAA        | -0.798448641 | -0.862583575 | -0.064134935 | 0.956518691 | -1.0316999   | 0.360506174 | 0.726116715 | 2AAA       | -0.798448641 | -0.918755899 | -0.120307258 | 0.919991694 | -1.825772625 | 0.165365321 | 0.701104385 |
| 2ABA        | -1.197862038 | -1.399732468 | -0.20187043  | 0.869422641 | -2.376027628 | 0.063476607 | 0.599268681 | 2ABA       | -1.197862038 | -1.289976009 | -0.092113971 | 0.938147081 | -0.842754    | 0.437810164 | 0.830736102 |
| 3HIDH       | -1.126729332 | -1.188243173 | -0.06151384  | 0.958258078 | -0.539765613 | 0.612520129 | 0.855259588 | 3HIDH      | -1.126729332 | -1.110292476 | 0.016436856  | 1.01145831  | 0.227885047  | 0.828761472 | 0.961363308 |
| AAK1        | 0.885105929  | 0.904527365  | 0.019421435  | 1.013552933 | 0.519471569  | 0.625600302 | 0.855404931 | AAK1       | 0.885105929  | 0.941375953  | 0.056270024  | 1.039774027 | 1.758578369  | 0.138977657 | 0.701104385 |
| AAKG1       | -1.643061768 | -1.684256363 | -0.041194594 | 0.971849894 | -1.07316578  | 0.332236921 | 0.719846663 | AAKG1      | -1.643061768 | -1.680425948 | -0.037364179 | 0.974433624 | -0.652980208 | 0.542597896 | 0.840204914 |

|       |              |              |              |             |              |             |             |       |              |              |              |             |              |             |             |
|-------|--------------|--------------|--------------|-------------|--------------|-------------|-------------|-------|--------------|--------------|--------------|-------------|--------------|-------------|-------------|
| AAKG2 | -0.074105278 | -0.079933988 | -0.00582871  | 0.995967997 | -0.054184145 | 0.95888681  | 0.977027912 | AAKG2 | -0.074105278 | -0.090622683 | -0.016517405 | 0.988616297 | -0.236736114 | 0.822254627 | 0.958518887 |
| AATM  | -1.052092866 | -1.013022309 | 0.039070557  | 1.027451687 | 0.542752089  | 0.610608795 | 0.855259588 | AATM  | -1.052092866 | -0.995188151 | 0.056904715  | 1.04023156  | 0.512623716  | 0.630049785 | 0.890624101 |
| ABR   | 0.052019933  | -0.190682369 | -0.242702302 | 0.845160764 | -1.31425505  | 0.245819853 | 0.677779043 | ABR   | 0.052019933  | -0.004185975 | -0.056205908 | 0.961790174 | -0.57307728  | 0.591401218 | 0.874346114 |
| ACLY  | -1.030129236 | -0.972220139 | 0.057909096  | 1.040956005 | 0.578151745  | 0.588223197 | 0.849655729 | ACLY  | -1.030129236 | -1.035382418 | -0.005253182 | 0.996365393 | -0.05934461  | 0.954976486 | 0.984662387 |
| ACOC  | -1.062525325 | -1.02830533  | 0.034219995  | 1.024003038 | 0.190883893  | 0.856125331 | 0.93836189  | ACOC  | -1.062525325 | -1.49814568  | -0.435620355 | 0.739375757 | -3.348763239 | 0.020356343 | 0.574601062 |
| ACON  | -1.009675354 | -0.939105557 | 0.070569797  | 1.050131354 | 2.069003007  | 0.093357919 | 0.599268681 | ACON  | -1.009675354 | -0.987997161 | 0.021678193  | 1.015139639 | 0.71417603   | 0.507062727 | 0.840204914 |
| ACSL6 | 0.576811613  | 0.590869401  | 0.014057788  | 1.009791745 | 0.108267438  | 0.917994074 | 0.969827787 | ACSL6 | 0.576811613  | 0.67402522   | 0.097213607  | 1.069705458 | 2.018010173  | 0.099622839 | 0.701104385 |
| ACTN4 | 1.020400433  | 0.955784787  | -0.064615646 | 0.956200029 | -1.184289485 | 0.289522466 | 0.696820273 | ACTN4 | 1.020400433  | 0.933524882  | -0.086875551 | 0.941559681 | -1.467981502 | 0.202037536 | 0.701104385 |
| ACTZ  | -1.148604644 | -1.044690915 | 0.103913729  | 1.074684906 | 2.807800856  | 0.037645681 | 0.599268681 | ACTZ  | -1.148604644 | -1.062227695 | 0.086376949  | 1.061700575 | 1.628549375  | 0.164337201 | 0.701104385 |
| ADDA  | 0.160984051  | 0.213915978  | 0.052931927  | 1.037370987 | 1.292680689  | 0.252630433 | 0.682883507 | ADDA  | 0.160984051  | 0.192448229  | 0.031464178  | 1.022048868 | 0.938121804  | 0.391250671 | 0.785904876 |
| ADDB  | -0.163775112 | -0.187986636 | -0.024211524 | 0.983357886 | -0.638816785 | 0.551053013 | 0.821069404 | ADDB  | -0.163775112 | -0.148831262 | 0.01494385   | 1.01041212  | 0.177137765  | 0.866352301 | 0.969183434 |
| ADHX  | -1.330667114 | -1.321260191 | 0.009406923  | 1.006541686 | 0.19098595   | 0.856049518 | 0.93836189  | ADHX  | -1.330667114 | -1.36380066  | -0.033133547 | 0.977295297 | -0.50699662  | 0.633719428 | 0.890624101 |
| ADT1  | 1.062824155  | 1.093147393  | 0.030323238  | 1.021240911 | 0.855643667  | 0.431277833 | 0.7652291   | ADT1  | 1.062824155  | 1.096873206  | 0.03404905   | 1.023881711 | 1.008809323  | 0.359364038 | 0.769774105 |
| ADT3  | 1.049287916  | 1.094768887  | 0.045480971  | 1.032027183 | 0.39733006   | 0.717705313 | 0.893619869 | ADT3  | 1.049287916  | 1.106510499  | 0.057222583  | 1.040460779 | 0.939362456  | 0.400729438 | 0.786848948 |
| AINX  | 0.227826008  | 0.346765035  | 0.118939027  | 1.08593596  | 1.744693051  | 0.141486656 | 0.599268681 | AINX  | 0.227826008  | 0.236754726  | 0.008928719  | 1.006208107 | 0.107755771  | 0.918379832 | 0.980250095 |
| AIP   | -1.05516519  | -1.096207263 | -0.041042073 | 0.971952642 | -0.52264746  | 0.62354282  | 0.855404931 | AIP   | -1.05516519  | -1.084253607 | -0.029088417 | 0.980039351 | -0.339751559 | 0.747850464 | 0.949291667 |
| AK1C1 | 0.047537046  | 0.199083239  | 0.151546193  | 1.110759279 | 1.637725474  | 0.16240508  | 0.599268681 | AK1C1 | 0.047537046  | 0.059714135  | 0.012177089  | 1.008476236 | 0.054369308  | 0.95874648  | 0.984870363 |
| AKA12 | 1.527802578  | 1.676306722  | 0.148504144  | 1.108419613 | 1.718824201  | 0.146283593 | 0.599268681 | AKA12 | 1.527802578  | 1.621425666  | 0.093623089  | 1.06704653  | 1.301134403  | 0.249941319 | 0.701104385 |
| AL3A1 | 0.947308907  | 1.007533787  | 0.06022488   | 1.042628268 | 2.330590437  | 0.067161892 | 0.599268681 | AL3A1 | 0.947308907  | 0.953506835  | 0.006197928  | 1.004305317 | 0.105014411  | 0.920447039 | 0.980250095 |
| ALDH2 | -1.009492421 | -0.898177481 | 0.11131494   | 1.080212344 | 1.277436779  | 0.257546745 | 0.682883507 | ALDH2 | -1.009492421 | -0.878711132 | 0.130781289  | 1.094886474 | 1.275432064  | 0.258199765 | 0.707019134 |
| ALDOA | -0.340341509 | -0.225933508 | 0.114408002  | 1.082530747 | 2.099624959  | 0.089795976 | 0.599268681 | ALDOA | -0.340341509 | -0.244605296 | 0.095736213  | 1.068610585 | 1.807652171  | 0.130466066 | 0.701104385 |
| ALDOC | -0.845555812 | -0.753366942 | 0.09218887   | 1.06598628  | 1.445085391  | 0.2080539   | 0.622510479 | ALDOC | -0.845555812 | -0.806530929 | 0.039024883  | 1.02741916  | 0.750660141  | 0.486660346 | 0.840204914 |
| ALDR  | -1.53027979  | -1.474461407 | 0.055818384  | 1.039448574 | 0.443495475  | 0.675940339 | 0.875702776 | ALDR  | -1.53027979  | -1.51083053  | 0.019449261  | 1.013572481 | 0.137732989  | 0.895826215 | 0.976856136 |
| ANK1  | 0.815550482  | 0.872555488  | 0.057005006  | 1.040303876 | 1.927825949  | 0.111801373 | 0.599268681 | ANK1  | 0.815550482  | 0.790519734  | -0.025030747 | 0.982799653 | -0.725871124 | 0.500458388 | 0.840204914 |
| ANK2  | 0.657587124  | 0.729304359  | 0.071717236  | 1.050966902 | 3.497879233  | 0.017323693 | 0.599268681 | ANK2  | 0.657587124  | 0.690064713  | 0.032477589  | 1.022767051 | 0.749174804  | 0.48747941  | 0.840204914 |
| ANK3  | -0.627445903 | -0.870614392 | -0.243168488 | 0.844887706 | -1.084069292 | 0.327817383 | 0.719846663 | ANK3  | -0.627445903 | -1.085301735 | -0.457855832 | 0.728067527 | -4.453375962 | 0.00668137  | 0.543407796 |
| ANXA3 | 1.049505935  | 1.053801478  | 0.004295544  | 1.002981881 | 0.041332206  | 0.968630753 | 0.984295941 | ANXA3 | 1.049505935  | 1.164997956  | 0.115492021  | 1.08334445  | 1.473210386  | 0.200687138 | 0.701104385 |
| AOFB  | 1.957498967  | 2.027093324  | 0.069594357  | 1.049421576 | 0.827847786  | 0.445457956 | 0.781079635 | AOFB  | 1.957498967  | 2.087519502  | 0.130020535  | 1.094309277 | 1.16096953   | 0.298064385 | 0.740068144 |
| AP180 | -0.553996629 | -0.614741816 | -0.060745186 | 0.958768764 | -1.110437345 | 0.317337639 | 0.714099507 | AP180 | -0.553996629 | -0.61821028  | -0.064213651 | 0.956466503 | -1.514142312 | 0.190412525 | 0.701104385 |
| AP1B1 | -0.026847945 | 0.017067366  | 0.04391531   | 1.0309078   | 1.165269671  | 0.296472721 | 0.696820273 | AP1B1 | -0.026847945 | 0.005331179  | 0.032179124  | 1.022555483 | 1.443115858  | 0.208579359 | 0.701104385 |
| AP2A1 | 0.071103815  | 0.141443276  | 0.070339461  | 1.049963707 | 0.872782873  | 0.422708009 | 0.7652291   | AP2A1 | 0.071103815  | 0.060920915  | -0.0101829   | 0.992966602 | -0.177839829 | 0.865829234 | 0.969183434 |
| AP2A2 | -0.009592579 | 0.230620778  | 0.240213357  | 1.181167329 | 2.175902599  | 0.081533374 | 0.599268681 | AP2A2 | -0.009592579 | 0.09243516   | 0.102027738  | 1.073280922 | 1.224831841  | 0.275189679 | 0.730369506 |
| AP2B1 | 0.09921961   | 0.164766731  | 0.06554712   | 1.046481727 | 1.401607383  | 0.219951874 | 0.632991271 | AP2B1 | 0.09921961   | 0.171497701  | 0.07227809   | 1.05137555  | 3.225197517  | 0.023330198 | 0.574601062 |
| AP2M1 | 0.100202306  | 0.162815191  | 0.062612886  | 1.044355496 | 1.140039329  | 0.305919395 | 0.701430847 | AP2M1 | 0.100202306  | 0.173101321  | 0.072899016  | 1.051828152 | 1.303902316  | 0.249066592 | 0.701104385 |
| AP3B2 | -0.299692749 | -0.384660549 | -0.0849678   | 0.942805578 | -0.886247652 | 0.416068359 | 0.761445491 | AP3B2 | -0.299692749 | -0.483023748 | -0.183330999 | 0.880667298 | -1.704672042 | 0.148976795 | 0.701104385 |
| ARC1A | -0.508242252 | -0.559008635 | -0.050766383 | 0.965423344 | -1.6364559   | 0.162671053 | 0.599268681 | ARC1A | -0.508242252 | -0.457824521 | 0.050417732  | 1.035564728 | 3.133735867  | 0.025848261 | 0.574601062 |
| ARF1  | -1.090006247 | -1.125708363 | -0.035702116 | 0.975556871 | -0.294323371 | 0.780338299 | 0.919848905 | ARF1  | -1.090006247 | -1.090409427 | -0.00040318  | 0.999720576 | -0.003412812 | 0.997408953 | 0.997824096 |
| ARP2  | -0.554659575 | -0.47709177  | 0.077567805  | 1.055237548 | 0.853529172  | 0.432344292 | 0.7652291   | ARP2  | -0.554659575 | -0.445951153 | 0.108708422  | 1.078262486 | 1.938053396  | 0.110345685 | 0.701104385 |
| ARP3  | -1.162265666 | -1.128827159 | 0.033438507  | 1.0234485   | 0.708212276  | 0.510453766 | 0.816292579 | ARP3  | -1.162265666 | -1.231910733 | -0.069645068 | 0.952872395 | -2.111047401 | 0.088504267 | 0.701104385 |
| ARPC2 | -0.668388536 | -0.648281649 | 0.020106887  | 1.014034605 | 0.478191755  | 0.65268983  | 0.865608177 | ARPC2 | -0.668388536 | -0.674624914 | -0.006236378 | 0.995686602 | -0.106870411 | 0.919047386 | 0.980250095 |
| ARPC3 | -0.510862034 | -0.507150172 | 0.003711862  | 1.002576179 | 0.077902145  | 0.940927331 | 0.97465736  | ARPC3 | -0.510862034 | -0.469646391 | 0.041215643  | 1.028980501 | 0.589496296  | 0.581156303 | 0.869428278 |
| AT1A1 | 1.554935262  | 1.664175032  | 0.10923977   | 1.078659686 | 2.067024876  | 0.093593073 | 0.599268681 | AT1A1 | 1.554935262  | 1.583893467  | 0.028958205  | 1.020275102 | 0.425691138  | 0.688034514 | 0.916568947 |
| AT1A2 | 0.784508275  | 0.802607163  | 0.018098888  | 1.012624214 | 0.204702728  | 0.845876442 | 0.93836189  | AT1A2 | 0.784508275  | 0.804665388  | 0.020157113  | 1.014069909 | 0.250379864  | 0.812256299 | 0.958518887 |
| AT1A3 | 0.50927038   | 0.530712627  | 0.021442247  | 1.014973631 | 0.378518486  | 0.720584722 | 0.893619869 | AT1A3 | 0.50927038   | 0.526459446  | 0.017189066  | 1.011985813 | 0.205003195  | 0.845653972 | 0.967185032 |

|        |              |              |              |             |              |             |             |        |              |              |              |             |              |             |             |
|--------|--------------|--------------|--------------|-------------|--------------|-------------|-------------|--------|--------------|--------------|--------------|-------------|--------------|-------------|-------------|
| AT1B1  | -0.558545453 | -0.476862848 | 0.081682605  | 1.058251552 | 2.106561735  | 0.089009174 | 0.599268681 | AT1B1  | -0.558545453 | -0.523384177 | 0.035161276  | 1.024671363 | 0.699890001  | 0.515212039 | 0.840204914 |
| AT2B1  | 1.337705558  | 1.381621858  | 0.0439163    | 1.030908508 | 2.240880339  | 0.075131588 | 0.599268681 | AT2B1  | 1.337705558  | 1.377365162  | 0.039659604  | 1.027871278 | 1.336259524  | 0.23904866  | 0.701104385 |
| ATLA1  | 1.083124671  | 1.076170728  | -0.006953943 | 0.995191492 | -0.103712593 | 0.921428966 | 0.969827787 | ATLA1  | 1.083124671  | 1.062884404  | -0.020240267 | 0.98606847  | -0.286510422 | 0.785979654 | 0.958518887 |
| ATPA   | 0.857786627  | 0.875079443  | 0.017292816  | 1.012058592 | 0.475659387  | 0.654372229 | 0.865608177 | ATPA   | 0.857786627  | 0.896810558  | 0.039023931  | 1.027418482 | 0.717216343  | 0.505340017 | 0.840204914 |
| ATPB   | 0.689862964  | 0.701101572  | 0.011238608  | 1.007820431 | 0.221613559  | 0.833381424 | 0.93836189  | ATPB   | 0.689862964  | 0.733120581  | 0.043257616  | 1.030437938 | 0.740988624  | 0.492011184 | 0.840204914 |
| ATPO   | 0.937795328  | 0.958460516  | 0.020665188  | 1.014427097 | 0.462726215  | 0.663000617 | 0.865646501 | ATPO   | 0.937795328  | 0.982521013  | 0.044725685  | 1.031487033 | 0.694646931  | 0.518225381 | 0.840204914 |
| B4DV12 | 0.013905197  | 0.08559583   | 0.071690633  | 1.050947523 | 1.106500325  | 0.318883779 | 0.714099507 | B4DV12 | 0.013905197  | 0.110493289  | 0.096588092  | 1.069241762 | 2.244091985  | 0.074829411 | 0.701104385 |
| B7Z1I4 | 0.767039141  | 0.819224927  | 0.052185786  | 1.036834613 | 1.057803493  | 0.338549886 | 0.725189245 | B7Z1I4 | 0.767039141  | 0.733540894  | -0.033498247 | 0.977048276 | -0.500688374 | 0.637847499 | 0.890624101 |
| BAIP2  | 1.084331478  | 0.784117571  | -0.300213907 | 0.812131974 | -1.598853702 | 0.170747186 | 0.599268681 | BAIP2  | 1.084331478  | 0.864100732  | -0.220230746 | 0.858428128 | -1.177994411 | 0.291806665 | 0.740068144 |
| BSN    | -0.197139515 | -0.314543897 | -0.117404382 | 0.921844692 | -1.872280761 | 0.120061215 | 0.599268681 | BSN    | -0.197139515 | -0.21854056  | -0.021401045 | 0.985275409 | -0.12640156  | 0.904339729 | 0.976856136 |
| C1TC   | -0.730859422 | -0.809212547 | -0.078353125 | 0.947138214 | -0.649716678 | 0.544538519 | 0.821069404 | C1TC   | -0.730859422 | -0.835865415 | -0.105005994 | 0.92980108  | -0.477195132 | 0.653351666 | 0.894787818 |
| C2C2L  | 0.590889971  | 0.61630795   | 0.025417979  | 1.01777452  | 0.644257709  | 0.547794822 | 0.821069404 | C2C2L  | 0.590889971  | 0.568351663  | -0.022538307 | 0.984499032 | -0.560980255 | 0.59901926  | 0.878716969 |
| CACB3  | 0.876609678  | 0.822864496  | -0.053745182 | 0.963432046 | -0.89062383  | 0.413928    | 0.761445491 | CACB3  | 0.876609678  | 0.950652923  | 0.074043245  | 1.052662708 | 1.564972719  | 0.178361808 | 0.701104385 |
| CACB4  | 1.057933737  | 0.996343795  | -0.061589943 | 0.958207531 | -0.985712737 | 0.369539626 | 0.731150069 | CACB4  | 1.057933737  | 0.984981813  | -0.072951924 | 0.950690781 | -0.847681719 | 0.435304    | 0.830736102 |
| CAD10  | 0.361580025  | 0.501396598  | 0.139816573  | 1.101765027 | 2.091814414  | 0.090690675 | 0.599268681 | CAD10  | 0.361580025  | 0.361367547  | -0.000212478 | 0.999852732 | -0.002866002 | 0.997824096 | 0.997824096 |
| CALB1  | -2.602824335 | -2.680475531 | -0.077651196 | 0.947599146 | -2.336848669 | 0.066640882 | 0.599268681 | CALB1  | -2.602824335 | -2.528189882 | 0.074634453  | 1.053094172 | 1.468625781  | 0.201870676 | 0.701104385 |
| CALM2  | 0.261080069  | 0.159839762  | -0.101240308 | 0.932231193 | -1.75142792  | 0.140264035 | 0.599268681 | CALM2  | 0.261080069  | 0.2565627    | -0.00451737  | 0.996873695 | -0.046865469 | 0.96443473  | 0.988021449 |
| CALR   | -0.440664289 | -0.358614667 | 0.082049622  | 1.058520803 | 1.218392404  | 0.277422837 | 0.692638474 | CALR   | -0.440664289 | -0.356481392 | 0.084182897  | 1.060087167 | 0.992032574  | 0.36673199  | 0.772390839 |
| CAND1  | -0.396431054 | -0.47949739  | -0.083066336 | 0.94404901  | -1.773340039 | 0.136359654 | 0.599268681 | CAND1  | -0.396431054 | -0.478393774 | -0.08196272  | 0.944771454 | -2.37936682  | 0.06321452  | 0.701104385 |
| CAP1   | -1.007998993 | -0.940027519 | 0.067971474  | 1.048241749 | 1.805109135  | 0.130893837 | 0.599268681 | CAP1   | -1.007998993 | -0.947499719 | 0.060499274  | 1.04282659  | 1.055905516  | 0.339336863 | 0.748135696 |
| CAP2   | -0.190459726 | -0.139407358 | 0.051052367  | 1.036020369 | 0.608428987  | 0.56948039  | 0.832147702 | CAP2   | -0.190459726 | -0.15728487  | 0.033174856  | 1.023261482 | 1.156882224  | 0.299584249 | 0.740068144 |
| CAPS1  | -0.721326025 | -0.811095282 | -0.089769257 | 0.939673027 | -1.037429114 | 0.347079043 | 0.726116715 | CAPS1  | -0.721326025 | -0.769842976 | -0.048516951 | 0.966929794 | -0.47642942  | 0.653860405 | 0.894787818 |
| CAPZB  | -0.217374308 | -0.288698211 | -0.071323904 | 0.951764201 | -1.991464081 | 0.103057037 | 0.599268681 | CAPZB  | -0.217374308 | -0.244689285 | -0.027314978 | 0.981244809 | -1.218068928 | 0.277535445 | 0.730369506 |
| CBR1   | -1.139647001 | -1.275877571 | -0.13623057  | 0.909893394 | -1.261899789 | 0.262647503 | 0.682883507 | CBR1   | -1.139647001 | -1.09943552  | 0.04021148   | 1.028264546 | 0.311769785  | 0.767796756 | 0.954130004 |
| CDC42  | -0.112885546 | -0.039643897 | 0.073241649  | 1.052077986 | 1.629781013  | 0.164076549 | 0.599268681 | CDC42  | -0.112885546 | -0.097486874 | 0.015398673  | 1.010730712 | 0.260296491  | 0.805014494 | 0.958518887 |
| CDK5   | -0.06157837  | -0.010643874 | 0.050934495  | 1.035935727 | 0.532299645  | 0.617313597 | 0.855404931 | CDK5   | -0.06157837  | -0.055443529 | 0.006134841  | 1.004261402 | 0.080134598  | 0.939238757 | 0.984662387 |
| CH60   | 0.021996336  | 0.015448985  | -0.006547351 | 0.995472004 | -0.198692491 | 0.850329894 | 0.93836189  | CH60   | 0.021996336  | 0.037955643  | 0.015959307  | 1.011123561 | 0.488772178  | 0.645686005 | 0.894787818 |
| CISY   | -0.856256877 | -0.812627826 | 0.043629051  | 1.030703268 | 0.925401579  | 0.397224585 | 0.75509741  | CISY   | -0.856256877 | -0.838903643 | 0.017353234  | 1.012100977 | 0.34445537   | 0.744518746 | 0.949291667 |
| CKAP4  | 0.855797009  | 0.859847657  | 0.004050648  | 1.002811641 | 0.054459835  | 0.958677873 | 0.977027912 | CKAP4  | 0.855797009  | 0.872672023  | 0.016875014  | 1.011765544 | 0.197060739  | 0.851540088 | 0.967185032 |
| CKAP5  | 0.865917699  | 0.918365575  | 0.052447875  | 1.037022988 | 1.270335157  | 0.259866864 | 0.682883507 | CKAP5  | 0.865917699  | 0.949762033  | 0.083844333  | 1.059838421 | 1.551189399  | 0.181553962 | 0.701104385 |
| CLAP2  | 0.555683093  | 0.517008893  | -0.0386742   | 0.973549204 | -0.640043183 | 0.550317508 | 0.821069404 | CLAP2  | 0.555683093  | 0.539810747  | -0.015872346 | 0.989058427 | -0.235962291 | 0.822822865 | 0.958518887 |
| CLH1   | -0.761907967 | -0.798072145 | -0.036164177 | 0.975244473 | -1.139220576 | 0.306230324 | 0.701430847 | CLH1   | -0.761907967 | -0.865081036 | -0.103173068 | 0.930983131 | -4.713945022 | 0.005271023 | 0.543407796 |
| CMC1   | 0.918568419  | 0.98006915   | 0.061500731  | 1.043550727 | 1.206008945  | 0.281763137 | 0.694279103 | CMC1   | 0.918568419  | 0.983040269  | 0.06447185   | 1.045702053 | 1.213946818  | 0.278974029 | 0.730369506 |
| CN37   | 0.854024846  | 0.926147558  | 0.072122711  | 1.051262323 | 1.073284211  | 0.332188645 | 0.719846663 | CN37   | 0.854024846  | 0.876498121  | 0.022473275  | 1.015699246 | 0.164592115  | 0.87571214  | 0.971089567 |
| CNDP2  | -1.299187801 | -1.446935712 | -0.147747912 | 0.902658439 | -1.402978652 | 0.219566957 | 0.632991271 | CNDP2  | -1.299187801 | -1.497505048 | -0.198317247 | 0.871566562 | -1.610872193 | 0.1681237   | 0.701104385 |
| CNTN1  | 1.192288232  | 1.276098514  | 0.083810283  | 1.059813407 | 1.725873908  | 0.144960331 | 0.599268681 | CNTN1  | 1.192288232  | 1.228413514  | 0.036125283  | 1.025356275 | 0.650969335  | 0.543793101 | 0.840204914 |
| CNTN2  | 1.053753038  | 1.022099422  | -0.031653616 | 0.97829833  | -0.35651754  | 0.736004146 | 0.90677635  | CNTN2  | 1.053753038  | 0.978595074  | -0.075157964 | 0.949238181 | -0.604843402 | 0.571680247 | 0.858659176 |
| CNTP1  | 1.577389058  | 1.663103605  | 0.085714547  | 1.061213216 | 1.007706678  | 0.359844501 | 0.726116715 | CNTP1  | 1.577389058  | 1.56606115   | -0.011327908 | 0.992178838 | -0.091636457 | 0.930544983 | 0.984662387 |
| CO2    | 0.724331011  | 0.769794887  | 0.045463876  | 1.032014954 | 1.901010356  | 0.115713181 | 0.599268681 | CO2    | 0.724331011  | 0.775575706  | 0.051244696  | 1.036158492 | 0.745579789  | 0.489465892 | 0.840204914 |
| CO3    | 0.882275025  | 0.939976289  | 0.057701263  | 1.040806057 | 1.340207284  | 0.237852336 | 0.669181572 | CO3    | 0.882275025  | 0.941865326  | 0.059590301  | 1.042169761 | 2.258300669  | 0.073508056 | 0.701104385 |
| COF1   | -1.035911595 | -1.06946506  | -0.033553465 | 0.977010881 | -0.747416057 | 0.488450513 | 0.79405315  | COF1   | -1.035911595 | -1.051802063 | -0.015890467 | 0.989046004 | -0.309564038 | 0.76937804  | 0.954130004 |
| COPA   | -0.285013109 | -0.292261953 | -0.007248845 | 0.994988086 | -0.085102967 | 0.935482116 | 0.97465736  | COPA   | -0.285013109 | -0.251590113 | 0.033422996  | 1.023437496 | 0.164496329  | 0.875783694 | 0.971089567 |
| COPG1  | -0.47698903  | -0.593197329 | -0.116208299 | 0.922609275 | -2.288563735 | 0.070776268 | 0.599268681 | COPG1  | -0.47698903  | -0.548603991 | -0.071614962 | 0.951572206 | -1.099022679 | 0.321838312 | 0.744678133 |
| COR1A  | -0.433782788 | -0.385353791 | 0.048428997  | 1.0341382   | 0.88711685   | 0.425135825 | 0.7652291   | COR1A  | -0.433782788 | -0.403387918 | 0.03039487   | 1.021291618 | 0.085482642  | 0.937263082 | 0.984662387 |



|        |              |              |              |             |              |             |             |        |              |              |              |             |              |             |             |
|--------|--------------|--------------|--------------|-------------|--------------|-------------|-------------|--------|--------------|--------------|--------------|-------------|--------------|-------------|-------------|
| COR1C  | -0.376496035 | -0.425094647 | -0.048598612 | 0.966875065 | -0.816012907 | 0.451601362 | 0.783169648 | COR1C  | -0.376496035 | -0.388568374 | -0.012072338 | 0.991667006 | -0.209840984 | 0.842074267 | 0.967185032 |
| CPNE6  | 0.832959982  | 0.835237556  | 0.002277574  | 1.001579941 | 0.037542152  | 0.971505528 | 0.984563398 | CPNE6  | 0.832959982  | 0.864967614  | 0.032007632  | 1.02243394  | 0.841281716  | 0.438561071 | 0.830736102 |
| CPNS1  | 0.502684589  | 0.453290872  | -0.049393717 | 0.966342343 | -0.766616567 | 0.477923601 | 0.787665904 | CPNS1  | 0.502684589  | 0.631993094  | 0.129308505  | 1.093769323 | 1.987853472  | 0.103533592 | 0.701104385 |
| CPT1A  | 0.98589389   | 0.912404249  | -0.073489641 | 0.950336509 | -0.952250812 | 0.384699882 | 0.739958446 | CPT1A  | 0.98589389   | 1.035648413  | 0.049754523  | 1.035088787 | 0.78003636   | 0.470664002 | 0.840204914 |
| CSK1   | 0.545856837  | 0.428867567  | -0.11698927  | 0.922109976 | -0.754284203 | 0.48466605  | 0.79405315  | CSK1   | 0.545856837  | 0.339917338  | -0.205939499 | 0.86697392  | -1.735919822 | 0.143095468 | 0.701104385 |
| CTNA1  | 0.78257588   | 0.919697148  | 0.137121268  | 1.099708583 | 3.265016808  | 0.022321313 | 0.599268681 | CTNA1  | 0.78257588   | 0.856781769  | 0.07420589   | 1.052781388 | 0.945008092  | 0.398164009 | 0.785904876 |
| CTNB1  | 0.994966987  | 1.156279443  | 0.161312456  | 1.118304025 | 10.57415141  | 0.000130718 | 0.049280743 | CTNB1  | 0.994966987  | 1.069791312  | 0.074824325  | 1.053232777 | 1.390431686  | 0.223112756 | 0.701104385 |
| CUL3   | -0.280852258 | -0.234404651 | 0.046447607  | 1.032718895 | 0.67591653   | 0.529088372 | 0.817484903 | CUL3   | -0.280852258 | -0.36605022  | -0.085197962 | 0.942655179 | -1.058318112 | 0.338336772 | 0.748135696 |
| CXA1   | 1.450972858  | 1.650438311  | 0.199465453  | 1.148272818 | 2.057888476  | 0.094687285 | 0.599268681 | CXA1   | 1.450972858  | 1.710382173  | 0.259409315  | 1.196988519 | 3.819422952  | 0.012380417 | 0.574601062 |
| CYFP1  | 0.079390274  | -0.014236635 | -0.09362691  | 0.937163772 | -1.181272305 | 0.290615276 | 0.696820273 | CYFP1  | 0.079390274  | -0.022153601 | -0.101543875 | 0.932035057 | -1.322499697 | 0.243262262 | 0.701104385 |
| DAAM2  | -0.956926015 | -1.059356721 | -0.102430706 | 0.931462307 | -3.195625612 | 0.024112784 | 0.599268681 | DAAM2  | -0.956926015 | -1.119473555 | -0.16254754  | 0.893446012 | -3.179629938 | 0.0245484   | 0.574601062 |
| DCE1   | -1.141495014 | -0.958318822 | 0.183176192  | 1.135380754 | 2.598775432  | 0.048320967 | 0.599268681 | DCE1   | -1.141495014 | -0.925836942 | 0.215658072  | 1.161233479 | 1.716750228  | 0.146675196 | 0.701104385 |
| DCE2   | -1.038468719 | -0.953457646 | 0.085011073  | 1.060695882 | 0.743253598  | 0.490754334 | 0.79405315  | DCE2   | -1.038468719 | -0.95733942  | 0.081129299  | 1.057845767 | 0.934203847  | 0.393082983 | 0.785904876 |
| DCLK1  | 0.27828983   | 0.157802257  | -0.120487573 | 0.919876717 | -5.511555971 | 0.002690182 | 0.253549614 | DCLK1  | 0.27828983   | 0.20167873   | -0.0766111   | 0.948282555 | -1.365336851 | 0.230367027 | 0.701104385 |
| DCTN2  | -0.615072811 | -0.630013986 | -0.014941175 | 0.98969701  | -0.177650235 | 0.865970481 | 0.940838246 | DCTN2  | -0.615072811 | -0.626326684 | -0.011253873 | 0.992229755 | -0.131813525 | 0.900271719 | 0.976856136 |
| DGKA   | -1.789645468 | -2.086381117 | -0.296735649 | 0.814092341 | -1.425369095 | 0.213371501 | 0.628445749 | DGKA   | -1.789645468 | -1.845647509 | -0.056002041 | 0.961926094 | -0.187691813 | 0.858497437 | 0.969022557 |
| DHE3   | -0.972927245 | -0.940120645 | 0.0328066    | 1.023000322 | 0.549326671  | 0.60641346  | 0.855259588 | DHE3   | -0.972927245 | -0.901429852 | 0.071497393  | 1.050806764 | 1.73413892   | 0.143424291 | 0.701104385 |
| DIRA2  | 0.26871659   | 0.300625524  | 0.031908934  | 1.022363995 | 0.798929801  | 0.460580435 | 0.783169648 | DIRA2  | 0.26871659   | 0.234351551  | -0.034365039 | 0.976461428 | -0.62178609  | 0.561332679 | 0.849889236 |
| DLG2   | 0.732223158  | 0.123712921  | -0.608510237 | 0.655873624 | -2.072533943 | 0.092939717 | 0.599268681 | DLG2   | 0.732223158  | 0.203543555  | -0.528679602 | 0.693188871 | -1.376089338 | 0.227232034 | 0.701104385 |
| DLG3   | 0.288385684  | -0.010454247 | -0.298839931 | 0.81290579  | -1.164380486 | 0.296801229 | 0.696820273 | DLG3   | 0.288385684  | -0.17758924  | -0.465974924 | 0.72398167  | -1.353496393 | 0.233866085 | 0.701104385 |
| DLG4   | 1.314390824  | 0.951144422  | -0.363246402 | 0.777413248 | -1.670157809 | 0.155755258 | 0.599268681 | DLG4   | 1.314390824  | 0.976998783  | -0.337392042 | 0.79147076  | -1.444044227 | 0.208331519 | 0.701104385 |
| DLGP1  | 0.995028952  | 0.234775452  | -0.7602535   | 0.590392582 | -1.446035618 | 0.207800837 | 0.622510479 | DLGP1  | 0.995028952  | 0.459661524  | -0.535367428 | 0.689982928 | -1.054553681 | 0.339898332 | 0.748135696 |
| DLGP2  | -1.012880352 | -0.938086503 | 0.074793849  | 1.053210529 | 0.568862171  | 0.594048971 | 0.851545482 | DLGP2  | -1.012880352 | -1.047844514 | -0.034964162 | 0.976056007 | -0.361071745 | 0.732800418 | 0.946321415 |
| DLGP4  | -0.920977514 | -0.866982034 | 0.05399548   | 1.038136018 | 2.617616887  | 0.047233396 | 0.599268681 | DLGP4  | -0.920977514 | -0.89806599  | 0.022911524  | 1.016007832 | 1.461485732  | 0.203727267 | 0.701104385 |
| DPYL1  | -1.299346712 | -1.294813315 | 0.004533397  | 1.003147254 | 0.116833799  | 0.911539584 | 0.968029361 | DPYL1  | -1.299346712 | -1.293455148 | 0.005891564  | 1.00409207  | 0.193336352  | 0.85430402  | 0.967185032 |
| DPYL2  | -1.267004673 | -1.274128648 | -0.007123975 | 0.995074208 | -0.239991527 | 0.819865452 | 0.936634168 | DPYL2  | -1.267004673 | -1.260842097 | 0.006162576  | 1.004280708 | 0.254091452  | 0.809543302 | 0.958518887 |
| DYHC1  | -0.088446814 | -0.151078161 | -0.062631347 | 0.957516102 | -1.244771653 | 0.268377094 | 0.689399976 | DYHC1  | -0.088446814 | -0.204086678 | -0.115639864 | 0.922972863 | -2.399318829 | 0.061672706 | 0.701104385 |
| DYN1   | -0.213258251 | -0.329583112 | -0.116324861 | 0.922534736 | -1.90052473  | 0.115785312 | 0.599268681 | DYN1   | -0.213258251 | -0.306279846 | -0.093021595 | 0.937557063 | -2.977620186 | 0.030884509 | 0.612813671 |
| DYN2   | -0.135242084 | -0.211549216 | -0.076307132 | 0.948482373 | -4.255689692 | 0.008047926 | 0.599268681 | DYN2   | -0.135242084 | -0.260072663 | -0.124830579 | 0.917111736 | -4.372223766 | 0.007207    | 0.543407796 |
| DYN3   | -1.511222784 | -1.304325849 | 0.206896935  | 1.154202959 | 1.580525663  | 0.174825801 | 0.604672724 | DYN3   | -1.511222784 | -1.154329849 | 0.356892935  | 1.280664817 | 3.552246601  | 0.016348477 | 0.574601062 |
| E41L1  | 0.079876517  | 0.065344129  | -0.014532389 | 0.989977479 | -0.100345975 | 0.923969048 | 0.969827787 | E41L1  | 0.079876517  | 0.109382582  | 0.029506064  | 1.020662622 | 0.27793809   | 0.792186486 | 0.958518887 |
| E41L3  | 0.246891575  | 0.27185972   | 0.024968145  | 1.017457226 | 0.281170817  | 0.789843736 | 0.919848905 | E41L3  | 0.246891575  | 0.224473542  | -0.022418033 | 0.984581111 | -0.272612511 | 0.796051336 | 0.958518887 |
| EAA1   | 1.496997019  | 1.552452092  | 0.055455073  | 1.039186845 | 0.782227569  | 0.469486314 | 0.783169648 | EAA1   | 1.496997019  | 1.599222766  | 0.102225747  | 1.073428239 | 1.889126129  | 0.117491767 | 0.701104385 |
| EAA2   | 1.421552597  | 1.611227996  | 0.1896754    | 1.140507078 | 1.788939514  | 0.133647387 | 0.599268681 | EAA2   | 1.421552597  | 1.581943755  | 0.160391158  | 1.117590109 | 1.567999934  | 0.177668111 | 0.701104385 |
| EF1A1  | -0.017126599 | -0.031495689 | -0.014369089 | 0.990089542 | -0.743301799 | 0.490727612 | 0.79405315  | EF1A1  | -0.017126599 | 0.005361987  | 0.022488586  | 1.015710025 | 0.501914179  | 0.637044169 | 0.890624101 |
| EFHD2  | -1.158115258 | -1.211718457 | -0.053603199 | 0.963526868 | -0.773578918 | 0.474147154 | 0.787460251 | EFHD2  | -1.158115258 | -1.187113229 | -0.028997971 | 0.980100794 | -0.329535844 | 0.755107709 | 0.95032034  |
| EGFR   | -0.005246195 | 0.010488587  | 0.015734782  | 1.010966212 | 0.312724159  | 0.767112969 | 0.918100283 | EGFR   | -0.005246195 | 0.024518765  | 0.029764959  | 1.020845798 | 0.93878394   | 0.390941688 | 0.785904876 |
| ENOA   | -2.279179912 | -2.190345925 | 0.088833987  | 1.063510286 | 1.535078306  | 0.18535597  | 0.613333248 | ENOA   | -2.279179912 | -2.264305694 | 0.014874218  | 1.010363353 | 0.276191744  | 0.793453096 | 0.958518887 |
| ENOG   | -1.684608246 | -1.649440125 | 0.035168121  | 1.024676224 | 0.635263968  | 0.553187343 | 0.821069404 | ENOG   | -1.684608246 | -1.668954876 | 0.01565337   | 1.010909165 | 0.245636979  | 0.815727471 | 0.958518887 |
| EPN1   | -0.662514727 | -0.736684342 | -0.074169615 | 0.9498887   | -0.597044409 | 0.576483571 | 0.838740166 | EPN1   | -0.662514727 | -0.748600581 | -0.086085854 | 0.94207521  | -1.093144535 | 0.324177394 | 0.744678133 |
| F8VWT9 | -0.52114971  | -0.616887072 | -0.095737362 | 0.93579384  | -1.187916903 | 0.288213465 | 0.696820273 | F8VWT9 | -0.52114971  | -0.647378141 | -0.126228432 | 0.916223561 | -2.233619002 | 0.075819613 | 0.701104385 |
| FARP1  | 0.414766118  | 0.415999086  | 0.001232968  | 1.000854993 | 0.011603413  | 0.99119077  | 0.996266494 | FARP1  | 0.414766118  | 0.368265186  | -0.046500932 | 0.968281924 | -0.435608667 | 0.681284353 | 0.914036303 |
| FARP2  | 0.067748115  | 0.213492228  | 0.145744113  | 1.106301114 | 1.653073618  | 0.159223651 | 0.599268681 | FARP2  | 0.067748115  | 0.056910984  | -0.010837132 | 0.992516415 | -0.041887371 | 0.968209702 | 0.989200698 |
| FLNC   | -1.059794089 | -1.080100662 | -0.020306573 | 0.986023152 | -0.247671598 | 0.814237803 | 0.933032377 | FLNC   | -1.059794089 | -0.876383952 | 0.183410137  | 1.135564881 | 1.303638318  | 0.2491499   | 0.701104385 |



|       |              |              |              |             |              |             |             |       |              |              |              |             |              |             |             |
|-------|--------------|--------------|--------------|-------------|--------------|-------------|-------------|-------|--------------|--------------|--------------|-------------|--------------|-------------|-------------|
| FLOT1 | 1.829366199  | 2.039712554  | 0.210346354  | 1.156965909 | 0.889293076  | 0.41457795  | 0.761445491 | FLOT1 | 1.829366199  | 1.976295499  | 0.1469293    | 1.107210323 | 1.352277522  | 0.23422909  | 0.701104385 |
| FLOT2 | 1.466895448  | 1.40241125   | -0.064484198 | 0.956287155 | -0.478995186 | 0.652156552 | 0.865608177 | FLOT2 | 1.466895448  | 1.400571052  | -0.066324396 | 0.955068161 | -0.544422668 | 0.609541159 | 0.883834681 |
| FSCN1 | -1.606365145 | -1.551393791 | 0.054971353  | 1.038838475 | 0.993242068  | 0.36619667  | 0.730455792 | FSCN1 | -1.606365145 | -1.674124168 | -0.067759023 | 0.954118906 | -1.55210847  | 0.181339383 | 0.701104385 |
| G3P   | 0.163530623  | 0.308089934  | 0.14455931   | 1.105392945 | 1.838638773  | 0.125366877 | 0.599268681 | G3P   | 0.163530623  | 0.269588536  | 0.106057912  | 1.076283328 | 1.441639941  | 0.208973955 | 0.701104385 |
| G6PI  | -1.156613925 | -1.092524687 | 0.064089238  | 1.045424763 | 0.524314835  | 0.622464175 | 0.855404931 | G6PI  | -1.156613925 | -1.176449725 | -0.0198358   | 0.986344959 | -0.197320278 | 0.851347569 | 0.967185032 |
| GBB1  | 1.222778057  | 1.321092882  | 0.098314824  | 1.070522282 | 1.804418836  | 0.131010201 | 0.599268681 | GBB1  | 1.222778057  | 1.316212762  | 0.093434705  | 1.066907207 | 1.85557688   | 0.12266616  | 0.701104385 |
| GBRA1 | 1.583748355  | 1.659411729  | 0.075663374  | 1.053845499 | 0.95844034   | 0.381858188 | 0.738259164 | GBRA1 | 1.583748355  | 1.569018753  | -0.014729602 | 0.989842161 | -0.170133738 | 0.871574796 | 0.971089567 |
| GBRB1 | 1.326412392  | 1.501110902  | 0.174698509  | 1.128728501 | 2.984508965  | 0.030640381 | 0.599268681 | GBRB1 | 1.326412392  | 1.476138066  | 0.149725674  | 1.109358509 | 2.715860568  | 0.041981634 | 0.701104385 |
| GBRG2 | 1.24153617   | 1.276542301  | 0.035006131  | 1.024561177 | 0.267204602  | 0.79998273  | 0.919848905 | GBRG2 | 1.24153617   | 1.272008624  | 0.030472454  | 1.021346542 | 0.365690791  | 0.729557364 | 0.946321415 |
| GCYB1 | 0.143664844  | 0.073083219  | -0.070581625 | 0.952254018 | -0.981712835 | 0.37132572  | 0.731150069 | GCYB1 | 0.143664844  | -0.016839178 | -0.160504022 | 0.894712438 | -2.427318326 | 0.059577272 | 0.701104385 |
| GDAP1 | 1.411892035  | 1.434302236  | 0.0224102    | 1.01565484  | 0.203092836  | 0.847068705 | 0.93836189  | GDAP1 | 1.411892035  | 1.428916396  | 0.017024361  | 1.011870287 | 0.120898791  | 0.908479406 | 0.976856136 |
| GDIA  | -1.408347427 | -1.337631501 | 0.070715927  | 1.050237727 | 1.716428671  | 0.146736006 | 0.599268681 | GDIA  | -1.408347427 | -1.534175056 | -0.125827629 | 0.916478138 | -1.805493309 | 0.130829123 | 0.701104385 |
| GDS1  | -1.261137142 | -1.333763559 | -0.072626417 | 0.950905304 | -0.922538322 | 0.39857927  | 0.75509741  | GDS1  | -1.261137142 | -1.338802299 | -0.077665158 | 0.947589976 | -0.837081254 | 0.440708807 | 0.830736102 |
| GEPH  | 0.435787898  | 0.40661594   | -0.029171958 | 0.979982602 | -0.66415255  | 0.535989016 | 0.821069404 | GEPH  | 0.435787898  | 0.396058153  | -0.039729745 | 0.972837169 | -0.873703374 | 0.422251496 | 0.820560896 |
| GFAP  | 0.885667847  | 1.113238789  | 0.227570942  | 1.170861915 | 1.243487694  | 0.268811131 | 0.689399976 | GFAP  | 0.885667847  | 1.12886228   | 0.243194432  | 1.183610526 | 2.343349889  | 0.066104251 | 0.701104385 |
| GHC1  | 0.686195535  | 0.565982042  | -0.120213493 | 0.920051489 | -1.914202474 | 0.113771361 | 0.599268681 | GHC1  | 0.686195535  | 0.712922139  | 0.026726604  | 1.018698131 | 0.238972309  | 0.820613228 | 0.958518887 |
| GLNA  | -1.703672955 | -1.586793285 | 0.11687967   | 1.08438696  | 1.507781179  | 0.191975232 | 0.613333248 | GLNA  | -1.703672955 | -1.632180088 | 0.071492867  | 1.050803468 | 1.268950163  | 0.260321564 | 0.707019134 |
| GLPK  | 0.637013834  | 0.561011773  | -0.076002061 | 0.94868296  | -1.002557281 | 0.362095338 | 0.726116715 | GLPK  | 0.637013834  | 0.490644821  | -0.146369013 | 0.903521594 | -2.124862076 | 0.086968207 | 0.701104385 |
| GLSK  | -0.216823186 | -0.265201306 | -0.04837812  | 0.967022847 | -1.368417298 | 0.229464771 | 0.655365293 | GLSK  | -0.216823186 | -0.281634915 | -0.06481173  | 0.956070076 | -1.516824758 | 0.189757245 | 0.701104385 |
| GNAI1 | 1.073887282  | 1.166842063  | 0.092954781  | 1.066552351 | 2.128787101  | 0.086536943 | 0.599268681 | GNAI1 | 1.073887282  | 1.153681279  | 0.079793997  | 1.056867119 | 1.666345103  | 0.156522718 | 0.701104385 |
| GNAO  | 1.363858991  | 1.447529101  | 0.08367011   | 1.05971044  | 1.630235821  | 0.163980402 | 0.599268681 | GNAO  | 1.363858991  | 1.452207787  | 0.088348796  | 1.063152678 | 2.168614666  | 0.082286824 | 0.701104385 |
| GNAQ  | 0.73250744   | 0.785615937  | 0.053108497  | 1.037497958 | 1.029144943  | 0.350598332 | 0.726116715 | GNAQ  | 0.73250744   | 0.846220836  | 0.113713396  | 1.082009672 | 1.394199307  | 0.222042379 | 0.701104385 |
| GNAS2 | 0.966152433  | 1.025910501  | 0.059758068  | 1.04229096  | 1.137217232  | 0.306992281 | 0.701430847 | GNAS2 | 0.966152433  | 1.062072856  | 0.095920423  | 1.068747039 | 1.172006528  | 0.293994214 | 0.740068144 |
| GNAZ  | 1.014486996  | 1.027810599  | 0.013323603  | 1.009277994 | 0.192497984  | 0.854926517 | 0.93836189  | GNAZ  | 1.014486996  | 1.16120046   | 0.146713464  | 1.107044691 | 1.671288396  | 0.155528404 | 0.701104385 |
| GPDM  | 0.609487279  | 0.619384496  | 0.009897217  | 1.006883814 | 0.149144049  | 0.887268914 | 0.955715373 | GPDM  | 0.609487279  | 0.679657377  | 0.070170099  | 1.049840456 | 1.187776393  | 0.288264072 | 0.73928949  |
| GPM6A | 1.372125794  | 1.507012198  | 0.134886404  | 1.098006355 | 5.687275659  | 0.002342644 | 0.253549614 | GPM6A | 1.372125794  | 1.491680549  | 0.119554755  | 1.086399526 | 3.280228273  | 0.021948991 | 0.574601062 |
| GRIA1 | 0.741467666  | 0.813195554  | 0.071727888  | 1.050974662 | 0.379456565  | 0.719930532 | 0.893619869 | GRIA1 | 0.741467666  | 0.647829783  | -0.093637883 | 0.937156644 | -0.611087769 | 0.56785261  | 0.856321736 |
| GRIA2 | 1.450599791  | 1.527075134  | 0.076475343  | 1.054438786 | 1.684049062  | 0.152990731 | 0.599268681 | GRIA2 | 1.450599791  | 1.552137355  | 0.101537565  | 1.072916323 | 2.722997838  | 0.041625972 | 0.701104385 |
| GRIA3 | 1.74365382   | 1.707514627  | -0.036139193 | 0.975261363 | -0.326318594 | 0.757399231 | 0.915190738 | GRIA3 | 1.74365382   | 1.825401695  | 0.081747876  | 1.058299431 | 0.928460027  | 0.395781606 | 0.785904876 |
| GRM1  | 0.217054885  | 0.250016626  | 0.032961741  | 1.023110337 | 0.316625754  | 0.764320068 | 0.918100283 | GRM1  | 0.217054885  | 0.287156339  | 0.070101454  | 1.049790505 | 0.528027483  | 0.620066271 | 0.890624101 |
| GRM2  | 1.020562943  | 1.09446624   | 0.073903298  | 1.0525606   | 1.212725115  | 0.279401677 | 0.692989686 | GRM2  | 1.020562943  | 1.197109709  | 0.176546766  | 1.130175458 | 3.029533268  | 0.029096966 | 0.609419798 |
| GRM3  | 0.948594922  | 0.946593718  | -0.002001204 | 0.998613833 | -0.032671591 | 0.975200585 | 0.9856585   | GRM3  | 0.948594922  | 1.084280356  | 0.135685434  | 1.098614649 | 1.728949696  | 0.144386774 | 0.701104385 |
| GRM5  | 0.332844126  | 0.362251615  | 0.029407489  | 1.020592885 | 0.705184308  | 0.512181488 | 0.816292579 | GRM5  | 0.332844126  | 0.357227595  | 0.024383469  | 1.017044968 | 0.234677087  | 0.823766895 | 0.958518887 |
| GRP75 | -0.051494568 | -0.055671148 | -0.004176579 | 0.997109202 | -0.070405702 | 0.946599979 | 0.97465736  | GRP75 | -0.051494568 | 0.02634899   | 0.077843559  | 1.055439263 | 1.977186043  | 0.104955026 | 0.701104385 |
| GRP78 | -0.276439628 | -0.142074357 | 0.134365271  | 1.097609803 | 1.599848559  | 0.170528497 | 0.599268681 | GRP78 | -0.276439628 | -0.157247939 | 0.119191689  | 1.086126159 | 2.616674006  | 0.047287178 | 0.701104385 |
| GSH1  | -1.385893856 | -1.193651954 | 0.192241903  | 1.142537805 | 1.226750735  | 0.274527355 | 0.690387094 | GSH1  | -1.385893856 | -1.209600489 | 0.176293367  | 1.129976968 | 0.973552866  | 0.37499136  | 0.781880077 |
| GSK3B | 0.177881925  | 0.222244223  | 0.044362298  | 1.031227254 | 0.392478324  | 0.710877804 | 0.89333644  | GSK3B | 0.177881925  | 0.041133852  | -0.136748073 | 0.909567069 | -0.795657795 | 0.462315236 | 0.838780504 |
| GSTM3 | -1.379712489 | -1.33454757  | 0.04516492   | 1.031801121 | 0.413525834  | 0.696359698 | 0.883931333 | GSTM3 | -1.379712489 | -1.310381656 | 0.069330833  | 1.049229905 | 0.653983659  | 0.542002123 | 0.840204914 |
| GUAD  | -1.57604098  | -1.629375794 | -0.053334813 | 0.96370613  | -0.49681009  | 0.640392837 | 0.865608177 | GUAD  | -1.57604098  | -1.556177366 | 0.019863614  | 1.013863629 | 0.257543413  | 0.807022798 | 0.958518887 |
| HOME1 | 1.084429597  | 1.042896196  | -0.041533402 | 0.971621688 | -0.338721067 | 0.748581201 | 0.915190738 | HOME1 | 1.084429597  | 0.988884596  | -0.095545001 | 0.935918622 | -0.656073591 | 0.540762666 | 0.840204914 |
| HOME2 | -1.194669337 | -1.12095225  | 0.073717087  | 1.052424754 | 0.42727478   | 0.686954407 | 0.879057516 | HOME2 | -1.194669337 | -0.949753192 | 0.244916145  | 1.18502389  | 1.481406     | 0.198588    | 0.701104385 |
| HPCA  | -0.9500372   | -0.941089818 | 0.008947382  | 1.006221124 | 0.284093159  | 0.787728084 | 0.919848905 | HPCA  | -0.9500372   | -0.937640297 | 0.012396903  | 1.008629903 | 0.479105438  | 0.652083391 | 0.894787818 |
| HPCL1 | 0.529765437  | 0.549692773  | 0.019927336  | 1.013908411 | 0.572905363  | 0.591509068 | 0.851140911 | HPCL1 | 0.529765437  | 0.490800498  | -0.038964939 | 0.973353029 | -0.653594975 | 0.542232843 | 0.840204914 |
| HS12A | 0.176901239  | 0.172220467  | -0.004680772 | 0.996760793 | -0.207246565 | 0.843993467 | 0.93836189  | HS12A | 0.176901239  | 0.105087215  | -0.071814024 | 0.951440917 | -3.556837747 | 0.016269029 | 0.574601062 |

|       |              |              |              |             |              |             |             |       |              |              |              |             |              |             |             |
|-------|--------------|--------------|--------------|-------------|--------------|-------------|-------------|-------|--------------|--------------|--------------|-------------|--------------|-------------|-------------|
| HS90A | -0.92772289  | -0.975581709 | -0.047858818 | 0.967370992 | -0.859691448 | 0.429241936 | 0.7652291   | HS90A | -0.92772289  | -0.995451037 | -0.067728147 | 0.954139326 | -1.629271249 | 0.164184381 | 0.701104385 |
| HS90B | -1.093608394 | -1.16217358  | -0.068565186 | 0.953585903 | -2.443766708 | 0.058382396 | 0.599268681 | HS90B | -1.093608394 | -1.130996712 | -0.037388318 | 0.97441732  | -2.264545838 | 0.072935199 | 0.701104385 |
| HSP74 | -1.443991527 | -1.434974943 | 0.009016584  | 1.006269391 | 0.134223292  | 0.898461479 | 0.962272664 | HSP74 | -1.443991527 | -1.3312468   | 0.112744727  | 1.081283422 | 3.131607617  | 0.025910393 | 0.574601062 |
| HSP7C | -0.845889107 | -0.824606511 | 0.021282596  | 1.014861319 | 0.366748428  | 0.728815689 | 0.900863983 | HSP7C | -0.845889107 | -0.788275764 | 0.057613343  | 1.040742631 | 1.398270964  | 0.220891076 | 0.701104385 |
| HUWE1 | -0.550319813 | -0.650609514 | -0.1002897   | 0.932845653 | -2.247681828 | 0.074493187 | 0.599268681 | HUWE1 | -0.550319813 | -0.697042875 | -0.146723061 | 0.90329989  | -2.845034666 | 0.036032935 | 0.679220829 |
| HXK1  | 0.921157591  | 0.940262896  | 0.019105305  | 1.013330862 | 0.561033722  | 0.598985461 | 0.855259588 | HXK1  | 0.921157591  | 0.943574335  | 0.022416744  | 1.015659447 | 0.502008899  | 0.636982118 | 0.890624101 |
| IDH3A | -0.892266789 | -0.901871988 | -0.009605199 | 0.993364298 | -0.156128832 | 0.882039428 | 0.952804769 | IDH3A | -0.892266789 | -0.952714274 | -0.060447485 | 0.958966628 | -1.362903124 | 0.23108221  | 0.701104385 |
| IMB1  | -0.826102108 | -0.831050176 | -0.004948068 | 0.996576136 | -0.070055429 | 0.946865126 | 0.97465736  | IMB1  | -0.826102108 | -0.859651937 | -0.033549828 | 0.977013344 | -1.083875699 | 0.327895411 | 0.744678133 |
| IP3KA | -0.275080857 | -0.369792073 | -0.094711216 | 0.93645968  | -0.277070545 | 0.792815618 | 0.919848905 | IP3KA | -0.275080857 | -0.473350332 | -0.198269475 | 0.871595423 | -0.663746809 | 0.536228087 | 0.840204914 |
| IPO5  | -0.20166127  | -0.150145308 | 0.051515962  | 1.036353336 | 0.728352305  | 0.499065022 | 0.804049202 | IPO5  | -0.20166127  | -0.046606117 | 0.155055153  | 1.113464184 | 0.902799822  | 0.408018161 | 0.797009568 |
| ITPR1 | 0.763868165  | 0.728812419  | -0.035055746 | 0.975994048 | -0.425951796 | 0.687856677 | 0.879057516 | ITPR1 | 0.763868165  | 0.731333356  | -0.032534809 | 0.977700971 | -0.211641749 | 0.840742896 | 0.967185032 |
| KAD1  | -1.72390434  | -1.768369569 | -0.044465229 | 0.969649175 | -0.653781742 | 0.542121971 | 0.821069404 | KAD1  | -1.72390434  | -1.799959364 | -0.076055024 | 0.948648133 | -0.568275075 | 0.594418329 | 0.875373867 |
| KAD4  | -0.021211564 | 0.001416971  | 0.022628535  | 1.015808559 | 0.331501658  | 0.753708937 | 0.915190738 | KAD4  | -0.021211564 | -0.017395817 | 0.003815748  | 1.002648376 | 0.059797198  | 0.954633606 | 0.984662387 |
| KALRN | 0.203486318  | 0.278104419  | 0.074618102  | 1.053082236 | 0.495830311  | 0.641036761 | 0.865608177 | KALRN | 0.203486318  | 0.118408424  | -0.085077894 | 0.942733635 | -0.522367165 | 0.623724251 | 0.890624101 |
| KAP2  | 0.184813512  | 0.154523372  | -0.03029014  | 0.979223347 | -0.34622155  | 0.743269386 | 0.912744491 | KAP2  | 0.184813512  | 0.10950076   | -0.075312752 | 0.949136342 | -0.815140002 | 0.452056982 | 0.838585027 |
| KAP3  | 0.131074731  | 0.143636181  | 0.01256145   | 1.008744949 | 0.299865844  | 0.77634559  | 0.919848905 | KAP3  | 0.131074731  | 0.189835453  | 0.058760722  | 1.041570665 | 2.057551226  | 0.094727931 | 0.701104385 |
| KCC2A | 1.147609244  | 0.725975592  | -0.421633652 | 0.746578749 | -1.940868015 | 0.109948533 | 0.599268681 | KCC2A | 1.147609244  | 0.743326377  | -0.404282867 | 0.755611798 | -1.628810932 | 0.164281813 | 0.701104385 |
| KCC2B | 0.915006464  | 0.451305836  | -0.463700629 | 0.72512387  | -2.164771602 | 0.082687108 | 0.599268681 | KCC2B | 0.915006464  | 0.469790144  | -0.44521632  | 0.73447418  | -1.950795793 | 0.108559487 | 0.701104385 |
| KCC2D | 1.063514242  | 0.666707755  | -0.396806487 | 0.759537717 | -2.148867209 | 0.084365776 | 0.599268681 | KCC2D | 1.063514242  | 0.715019726  | -0.348494516 | 0.785403256 | -1.609733873 | 0.168370466 | 0.701104385 |
| KCNA1 | 0.859266383  | 0.913985632  | 0.054719248  | 1.038656959 | 1.594652307  | 0.171673787 | 0.599268681 | KCNA1 | 0.859266383  | 0.798426582  | -0.060839801 | 0.958705889 | -0.736849289 | 0.494314028 | 0.840204914 |
| KCRB  | -2.100450473 | -2.075431241 | 0.025019232  | 1.017493256 | 0.624722459  | 0.559551556 | 0.824249722 | KCRB  | -2.100450473 | -2.126675733 | -0.02622526  | 0.981986258 | -0.800227823 | 0.459893565 | 0.838780504 |
| KPCA  | 1.016368694  | 1.047998595  | 0.031629902  | 1.022166278 | 0.384381067  | 0.71650079  | 0.893619869 | KPCA  | 1.016368694  | 0.921325548  | -0.095043146 | 0.936244247 | -1.135593105 | 0.307611221 | 0.740068144 |
| KPCE  | -0.644252693 | -0.720618843 | -0.07636615  | 0.948443574 | -0.90365042  | 0.407607799 | 0.760733368 | KPCE  | -0.644252693 | -0.694962634 | -0.050709942 | 0.965461114 | -1.344475318 | 0.236565228 | 0.701104385 |
| KPCG  | 0.371387786  | 0.324878754  | -0.046509032 | 0.968276488 | -0.518956662 | 0.625934246 | 0.855404931 | KPCG  | 0.371387786  | 0.381242773  | 0.009854987  | 1.006854341 | 0.137183374  | 0.896238796 | 0.976856136 |
| KPYM  | -1.97909447  | -2.030946705 | -0.051852235 | 0.964696987 | -1.312710758 | 0.246301668 | 0.677779043 | KPYM  | -1.97909447  | -1.99595214  | -0.01685767  | 0.988383156 | -0.38610922  | 0.715298981 | 0.937339888 |
| L1CAM | 1.3643129    | 1.424258102  | 0.059945202  | 1.042426165 | 1.155836837  | 0.29997407  | 0.698087805 | L1CAM | 1.3643129    | 1.434871377  | 0.070558477  | 1.050123115 | 1.134456823  | 0.308044895 | 0.740068144 |
| LDHA  | -1.617983078 | -1.623952416 | -0.005969338 | 0.995870918 | -0.09752863  | 0.926095499 | 0.969827787 | LDHA  | -1.617983078 | -1.577287132 | 0.040695946  | 1.028609901 | 0.663060787  | 0.536632468 | 0.840204914 |
| M2OM  | 1.034306616  | 1.049708326  | 0.01540171   | 1.01073284  | 0.489601404  | 0.64513883  | 0.865608177 | M2OM  | 1.034306616  | 1.049103786  | 0.01479717   | 1.010309396 | 0.287945387  | 0.784942405 | 0.958518887 |
| MAP1A | -0.022041646 | 0.022919     | 0.044960646  | 1.031655037 | 0.785666515  | 0.467642365 | 0.783169648 | MAP1A | -0.022041646 | 0.056119169  | 0.078160815  | 1.055671385 | 2.182448645  | 0.080862873 | 0.701104385 |
| MAP1B | 0.402976331  | 0.313475664  | -0.089500667 | 0.939847985 | -1.406804813 | 0.218496317 | 0.632991271 | MAP1B | 0.402976331  | 0.365965924  | -0.037010407 | 0.9746726   | -0.623471298 | 0.560310033 | 0.849889236 |
| MARE2 | 0.632814198  | 0.576086796  | -0.056727403 | 0.961442576 | -0.695923621 | 0.517490521 | 0.816292579 | MARE2 | 0.632814198  | 0.53492696   | -0.097887239 | 0.934400377 | -0.993996551 | 0.365863063 | 0.772390839 |
| MARK1 | 0.004347021  | -0.147876875 | -0.152223896 | 0.899862267 | -1.090069562 | 0.325406828 | 0.719846663 | MARK1 | 0.004347021  | -0.181631105 | -0.185978126 | 0.879052889 | -1.119399273 | 0.313842317 | 0.744678133 |
| MBP   | 0.069340856  | 0.178449935  | 0.109109079  | 1.078561976 | 1.170037015  | 0.2947169   | 0.696820273 | MBP   | 0.069340856  | 0.111094644  | 0.041753788  | 1.029364396 | 0.279382133  | 0.791139682 | 0.958518887 |
| MDHC  | -2.090570301 | -2.045444926 | 0.045125375  | 1.03177284  | 0.462633067  | 0.663062979 | 0.865646501 | MDHC  | -2.090570301 | -1.818298803 | 0.272271498  | 1.207707846 | 1.085395755  | 0.327283174 | 0.744678133 |
| MK01  | -0.20045304  | -0.366170517 | -0.165717477 | 0.891485058 | -1.617835359 | 0.166621979 | 0.599268681 | MK01  | -0.20045304  | -0.193255798 | 0.007197242  | 1.005001213 | 0.060662375  | 0.95397818  | 0.984662387 |
| MK03  | -0.380701276 | -0.481019658 | -0.100318382 | 0.932827107 | -1.162273134 | 0.297581072 | 0.696820273 | MK03  | -0.380701276 | -0.33556861  | 0.045132666  | 1.031778054 | 0.513015842  | 0.629794514 | 0.890624101 |
| MPCP  | 0.982036347  | 1.025762276  | 0.043725929  | 1.030772482 | 1.013518812  | 0.357317935 | 0.726116715 | MPCP  | 0.982036347  | 1.025657743  | 0.043621396  | 1.030697799 | 0.867122049  | 0.425523837 | 0.822679419 |
| MTAP2 | 0.104864456  | 0.132430201  | 0.027565745  | 1.019290828 | 0.926873118  | 0.396529789 | 0.75509741  | MTAP2 | 0.104864456  | 0.167023979  | 0.062159524  | 1.044027363 | 1.374665077  | 0.227644979 | 0.701104385 |
| MYPR  | 0.079508434  | 0.193904633  | 0.114396199  | 1.08252189  | 1.466431863  | 0.202439415 | 0.622510479 | MYPR  | 0.079508434  | 0.044846922  | -0.034661512 | 0.976260786 | -0.132906995 | 0.899450208 | 0.976856136 |
| NAC1  | 1.231909468  | 1.167208575  | -0.064700893 | 0.95614353  | -0.70346671  | 0.513163321 | 0.816292579 | NAC1  | 1.231909468  | 1.170812263  | -0.061097205 | 0.958534853 | -0.699834833 | 0.515243683 | 0.840204914 |
| NBEA  | -0.066677159 | -0.166011071 | -0.099333911 | 0.93346387  | -0.915704309 | 0.401827482 | 0.757444803 | NBEA  | -0.066677159 | -0.168637549 | -0.10196039  | 0.931766011 | -1.764024948 | 0.138005822 | 0.701104385 |
| NCAM1 | 1.196323292  | 1.287708499  | 0.091385208  | 1.065392631 | 2.035000567  | 0.09748783  | 0.599268681 | NCAM1 | 1.196323292  | 1.27430679   | 0.077983499  | 1.055541645 | 2.30108422   | 0.0696781   | 0.701104385 |
| NCAM2 | 1.616931489  | 1.655256539  | 0.038325049  | 1.026920892 | 0.420004805  | 0.691919757 | 0.881262664 | NCAM2 | 1.616931489  | 1.75798883   | 0.141057341  | 1.10271299  | 1.926450431  | 0.111998664 | 0.701104385 |
| NCAN  | 1.233638024  | 1.140316104  | -0.093321919 | 0.937361912 | -0.624473002 | 0.559702729 | 0.824249722 | NCAN  | 1.233638024  | 1.139267495  | -0.094370528 | 0.936680848 | -0.506802977 | 0.633845924 | 0.890624101 |

|       |              |              |              |             |              |             |             |       |              |              |              |             |              |             |             |
|-------|--------------|--------------|--------------|-------------|--------------|-------------|-------------|-------|--------------|--------------|--------------|-------------|--------------|-------------|-------------|
| NCDN  | -0.445896261 | -0.673802674 | -0.227906413 | 0.853873103 | -2.012894791 | 0.100275179 | 0.599268681 | NCDN  | -0.445896261 | -0.597700077 | -0.151803815 | 0.900124325 | -1.804281433 | 0.131033375 | 0.701104385 |
| NCPR  | -0.050333459 | 0.034702309  | 0.085035769  | 1.060714039 | 0.783737671  | 0.468675949 | 0.783169648 | NCPR  | -0.050333459 | 0.157416287  | 0.207749746  | 1.154885438 | 1.651079515  | 0.15963347  | 0.701104385 |
| NDUAA | 1.609795558  | 1.613653166  | 0.003857607  | 1.002677468 | 0.072720027  | 0.944848301 | 0.97465736  | NDUAA | 1.609795558  | 1.709269595  | 0.099474036  | 1.071382797 | 1.815469429  | 0.129160006 | 0.701104385 |
| NDUS4 | 1.123345294  | 1.250240133  | 0.126894838  | 1.091940949 | 1.462691465  | 0.203412602 | 0.622510479 | NDUS4 | 1.123345294  | 1.081317001  | -0.042028293 | 0.971288447 | -0.385021508 | 0.7160553   | 0.937339888 |
| NDUV1 | 1.088272754  | 1.09521888   | 0.006946126  | 1.004826297 | 0.144854743  | 0.89048355  | 0.956445294 | NDUV1 | 1.088272754  | 1.11247231   | 0.024199556  | 1.016915325 | 0.762054953  | 0.480409637 | 0.840204914 |
| NEB1  | 0.687347527  | 0.418409983  | -0.268937544 | 0.829930513 | -1.651913725 | 0.1594619   | 0.599268681 | NEB1  | 0.687347527  | 0.596045781  | -0.091301746 | 0.938675399 | -1.33007817  | 0.240933093 | 0.701104385 |
| NEGR1 | 1.251250328  | 1.356587767  | 0.105337438  | 1.075745972 | 1.00424898   | 0.361354602 | 0.726116715 | NEGR1 | 1.251250328  | 1.395226257  | 0.143975929  | 1.104946049 | 1.396449201  | 0.2214055   | 0.701104385 |
| NFASC | 1.263485086  | 1.336661873  | 0.073176787  | 1.052030687 | 1.226279638  | 0.274689825 | 0.690387094 | NFASC | 1.263485086  | 1.277358237  | 0.013873152  | 1.009662519 | 0.194598432  | 0.853367141 | 0.967185032 |
| NFL   | -0.278349731 | -0.164958147 | 0.113391584  | 1.081768343 | 1.963863019  | 0.106758907 | 0.599268681 | NFL   | -0.278349731 | -0.256204239 | 0.022145492  | 1.015468503 | 0.301791032  | 0.774960538 | 0.957902042 |
| NFM   | -0.252177416 | -0.179465012 | 0.072712404  | 1.051692107 | 1.013430497  | 0.357356215 | 0.726116715 | NFM   | -0.252177416 | -0.244475301 | 0.007702115  | 1.005352975 | 0.064587978  | 0.951004814 | 0.984662387 |
| NLGN2 | 1.26887583   | 0.969362286  | -0.299513545 | 0.812526322 | -8.809684136 | 0.000312854 | 0.058972925 | NLGN2 | 1.26887583   | 1.134874799  | -0.134001031 | 0.911300629 | -3.36992148  | 0.019891412 | 0.574601062 |
| NMDE1 | 0.891507002  | 0.512489032  | -0.37901797  | 0.768960838 | -0.979397338 | 0.3723629   | 0.731150069 | NMDE1 | 0.891507002  | 0.511545655  | -0.379961347 | 0.768458179 | -1.19042133  | 0.287312785 | 0.73928949  |
| NMDE2 | 0.731493116  | 0.843152341  | 0.111659225  | 1.080470157 | 2.526280765  | 0.052768744 | 0.599268681 | NMDE2 | 0.731493116  | 0.905025162  | 0.173532046  | 1.127816258 | 1.367361255  | 0.22977371  | 0.701104385 |
| NMDZ1 | 1.100559997  | 1.206413076  | 0.105853079  | 1.076130529 | 1.652069975  | 0.159429784 | 0.599268681 | NMDZ1 | 1.100559997  | 1.138252022  | 0.037692025  | 1.026470399 | 0.507615156  | 0.63331547  | 0.890624101 |
| NNTM  | 2.274587603  | 2.36259214   | 0.088004536  | 1.062899016 | 1.131928047  | 0.309011947 | 0.701792193 | NNTM  | 2.274587603  | 2.35760458   | 0.083016977  | 1.059230799 | 0.805697746  | 0.457007401 | 0.838780504 |
| NOS1  | 0.611831698  | 0.523351339  | -0.088480359 | 0.940512903 | -1.28937341  | 0.253689692 | 0.682883507 | NOS1  | 0.611831698  | 0.643884022  | 0.032052324  | 1.022465613 | 0.416864147  | 0.694070266 | 0.921353839 |
| NRX1A | 0.893246405  | 0.85252663   | -0.040719776 | 0.972169801 | -0.640895111 | 0.54980696  | 0.821069404 | NRX1A | 0.893246405  | 0.970031142  | 0.076784736  | 1.054664939 | 0.843077519  | 0.437645291 | 0.830736102 |
| NRX3A | 0.931325658  | 0.921530653  | -0.009795005 | 0.993233616 | -0.069288653 | 0.94744558  | 0.97465736  | NRX3A | 0.931325658  | 1.065715642  | 0.134389984  | 1.097628604 | 1.267865585  | 0.260678142 | 0.707019134 |
| NSF   | 0.968781306  | 0.919095994  | -0.049685312 | 0.966147047 | -1.035431221 | 0.347925064 | 0.726116715 | NSF   | 0.968781306  | 0.944926605  | -0.023854701 | 0.983601131 | -0.722610051 | 0.502293868 | 0.840204914 |
| NTRK2 | -0.733079688 | -0.791479341 | -0.058399653 | 0.960328799 | -1.103380599 | 0.320113572 | 0.714099507 | NTRK2 | -0.733079688 | -0.600256366 | 0.132823322  | 1.096437307 | 2.573385787  | 0.049830185 | 0.701104385 |
| ODO1  | 0.01843046   | 0.03039477   | 0.01196431   | 1.00832751  | 0.103455454  | 0.921622938 | 0.969827787 | ODO1  | 0.01843046   | 0.112503111  | 0.094072651  | 1.067379087 | 1.071261459  | 0.333013999 | 0.747299272 |
| ODPB  | -0.223879836 | -0.208738663 | 0.015141173  | 1.010550328 | 0.329439976  | 0.75517595  | 0.915190738 | ODPB  | -0.223879836 | -0.193093522 | 0.030786314  | 1.021568761 | 0.77966543   | 0.470863576 | 0.840204914 |
| OGDHL | 0.227346111  | 0.246162864  | 0.018816753  | 1.013128207 | 0.298106166  | 0.777612393 | 0.919848905 | OGDHL | 0.227346111  | 0.325004207  | 0.097658096  | 1.070035081 | 2.151654734  | 0.084068966 | 0.701104385 |
| OPA1  | 1.559598451  | 1.765775768  | 0.206177317  | 1.153627385 | 1.314082855  | 0.245873534 | 0.677779043 | OPA1  | 1.559598451  | 1.59891673   | 0.039318279  | 1.027628124 | 0.249954947  | 0.812567085 | 0.958518887 |
| OTUB1 | -1.236663111 | -1.290133009 | -0.053469898 | 0.963615899 | -0.593877057 | 0.578441494 | 0.838740166 | OTUB1 | -1.236663111 | -1.264543475 | -0.027880364 | 0.980860338 | -0.250422086 | 0.81222542  | 0.958518887 |
| PACN1 | -0.633268543 | -0.696627598 | -0.063359055 | 0.957033244 | -0.667982421 | 0.533735875 | 0.821069404 | PACN1 | -0.633268543 | -0.601804882 | 0.031463661  | 1.022048501 | 0.47460993   | 0.655070127 | 0.894787818 |
| PAK3  | -0.75258837  | -0.967059705 | -0.214471335 | 0.861861925 | -1.595754938 | 0.171430128 | 0.599268681 | PAK3  | -0.75258837  | -0.946207784 | -0.193619414 | 0.874409261 | -1.475054298 | 0.200213006 | 0.701104385 |
| PDE2A | 0.625726267  | 0.669054526  | 0.04332826   | 1.030488396 | 0.462753093  | 0.662982623 | 0.865646501 | PDE2A | 0.625726267  | 0.724396717  | 0.09867045   | 1.070786199 | 0.929629105  | 0.395231141 | 0.785904876 |
| PHB2  | 1.281713281  | 1.269582087  | -0.012131194 | 0.991626551 | -0.128929317 | 0.902439268 | 0.963794912 | PHB2  | 1.281713281  | 1.296913362  | 0.015200081  | 1.010591591 | 0.178686781  | 0.865198322 | 0.969183434 |
| PIPNB | -1.054004282 | -1.012352233 | 0.041652049  | 1.029291808 | 0.60963122   | 0.568743985 | 0.832147702 | PIPNB | -1.054004282 | -1.034509085 | 0.019495197  | 1.013604755 | 0.351703894  | 0.739397005 | 0.948179438 |
| PP1A  | -0.249865313 | -0.265955134 | -0.016089821 | 0.988909346 | -0.447989757 | 0.67290468  | 0.874776084 | PP1A  | -0.249865313 | -0.249587985 | 0.000277328  | 1.000192248 | 0.008310776  | 0.993690435 | 0.997824096 |
| PP1B  | -0.253361839 | -0.253797242 | -0.000435403 | 0.999698247 | -0.004917622 | 0.996266494 | 0.996266494 | PP1B  | -0.253361839 | -0.218581234 | 0.034780605  | 1.024401027 | 0.314628007  | 0.765749623 | 0.954130004 |
| PP2AA | -0.61267146  | -0.69989105  | -0.08721959  | 0.941335175 | -1.827156901 | 0.127232171 | 0.599268681 | PP2AA | -0.61267146  | -0.74541832  | -0.13274686  | 0.91209319  | -3.695865417 | 0.014059655 | 0.574601062 |
| PP2BA | -0.862549452 | -0.835931888 | 0.026617564  | 1.01862114  | 0.696699619  | 0.517044207 | 0.816292579 | PP2BA | -0.862549452 | -0.866592848 | -0.004043396 | 0.997201255 | -0.060554792 | 0.954059678 | 0.984662387 |
| PPIA  | -1.778723482 | -1.670812853 | 0.107910629  | 1.077666385 | 1.824926317  | 0.12759782  | 0.599268681 | PPIA  | -1.778723482 | -1.695872118 | 0.082851363  | 1.059109212 | 3.215329605  | 0.02358811  | 0.574601062 |
| PRDX1 | -0.600067354 | -0.632209706 | -0.032142351 | 0.977966972 | -0.543277798 | 0.610272705 | 0.855259588 | PRDX1 | -0.600067354 | -0.591407221 | 0.008660134  | 1.0060208   | 0.148743969  | 0.887568652 | 0.976856136 |
| PRDX2 | 1.383290193  | 1.363156309  | -0.020133883 | 0.986141185 | -0.482110048 | 0.650091288 | 0.865608177 | PRDX2 | 1.383290193  | 1.376379308  | -0.006910884 | 0.995221195 | -0.139301767 | 0.894648785 | 0.976856136 |
| PRDX5 | -1.615897219 | -1.591793123 | 0.024104096  | 1.01684804  | 0.426365176  | 0.68757469  | 0.879057516 | PRDX5 | -1.615897219 | -1.593104349 | 0.02279287   | 1.015924275 | 0.682041939  | 0.525519022 | 0.840204914 |
| PRS4  | -0.665454016 | -0.617790492 | 0.047663524  | 1.033589646 | 0.547442266  | 0.607614181 | 0.855259588 | PRS4  | -0.665454016 | -0.723606287 | -0.058152271 | 0.960493482 | -0.64124039  | 0.549600127 | 0.842273365 |
| PRS6A | -0.881205858 | -0.751272991 | 0.129932867  | 1.094242782 | 1.266159125  | 0.26124008  | 0.682883507 | PRS6A | -0.881205858 | -0.710876228 | 0.17032963   | 1.12531557  | 2.499402205  | 0.05452996  | 0.701104385 |
| PRS7  | 0.002186476  | 0.050970657  | 0.048784181  | 1.034392831 | 1.521308527  | 0.18866681  | 0.613333248 | PRS7  | 0.002186476  | 0.041113795  | 0.038927319  | 1.027349682 | 0.794264311  | 0.463055516 | 0.838780504 |
| PRS8  | -0.728890778 | -0.633834661 | 0.095056117  | 1.068106954 | 1.621622682  | 0.165810757 | 0.599268681 | PRS8  | -0.728890778 | -0.681231132 | 0.047659646  | 1.033586868 | 0.719034546  | 0.504311732 | 0.840204914 |
| PSD11 | -0.669605793 | -0.725382912 | -0.055777119 | 0.962076073 | -0.688718258 | 0.521647255 | 0.817222214 | PSD11 | -0.669605793 | -0.638031569 | 0.031574224  | 1.022126831 | 0.329544173  | 0.75510178  | 0.95032034  |
| PSD12 | -0.585068357 | -0.530571021 | 0.054497336  | 1.038497207 | 2.577592235  | 0.049576615 | 0.599268681 | PSD12 | -0.585068357 | -0.523189441 | 0.061878916  | 1.043824317 | 1.348731584  | 0.235288135 | 0.701104385 |

|        |              |              |              |             |              |             |             |        |              |              |              |             |              |             |             |
|--------|--------------|--------------|--------------|-------------|--------------|-------------|-------------|--------|--------------|--------------|--------------|-------------|--------------|-------------|-------------|
| PSMD1  | -0.880803655 | -0.929870462 | -0.049066807 | 0.966561338 | -0.266778272 | 0.800292946 | 0.919848905 | PSMD1  | -0.880803655 | -0.86727593  | 0.013527725  | 1.009420803 | 0.125621082  | 0.904926668 | 0.976856136 |
| PSMD7  | -0.555458018 | -0.516015293 | 0.039442725  | 1.02771677  | 0.477421983  | 0.653200987 | 0.865608177 | PSMD7  | -0.555458018 | -0.519348006 | 0.036110012  | 1.025345422 | 0.692003129  | 0.519749415 | 0.840204914 |
| PTPR2  | -0.378445713 | -0.369646262 | 0.008799451  | 1.006117953 | 0.211772098  | 0.840646548 | 0.93836189  | PTPR2  | -0.378445713 | -0.456919258 | -0.078473545 | 0.94705916  | -1.921067281 | 0.112774244 | 0.701104385 |
| PTPRA  | -1.651580355 | -1.943236514 | -0.291656158 | 0.816963677 | -3.789000049 | 0.012771498 | 0.599268681 | PTPRA  | -1.651580355 | -1.928043147 | -0.276462792 | 0.82561278  | -2.628250639 | 0.046631476 | 0.701104385 |
| PTPRS  | 0.884219455  | 0.900703769  | 0.016484315  | 1.011491583 | 0.518488298  | 0.626238093 | 0.855404931 | PTPRS  | 0.884219455  | 0.941965942  | 0.057746488  | 1.040838684 | 1.866236479  | 0.120997188 | 0.701104385 |
| PTPRZ  | 0.324049077  | 0.323414337  | -0.00063474  | 0.999560128 | -0.007531481 | 0.994282064 | 0.996266494 | PTPRZ  | 0.324049077  | 0.281231538  | -0.042817539 | 0.970757236 | -0.445813651 | 0.674373652 | 0.911250419 |
| PYGB   | -1.035148643 | -0.959242906 | 0.075905737  | 1.054022553 | 1.453658984  | 0.205781219 | 0.622510479 | PYGB   | -1.035148643 | -0.969331035 | 0.065817608  | 1.046677948 | 2.683163532  | 0.043654424 | 0.701104385 |
| Q6FHZ0 | -0.829531153 | -0.728487604 | 0.101043548  | 1.072548992 | 1.984004852  | 0.104044093 | 0.599268681 | Q6FHZ0 | -0.829531153 | -0.774847588 | 0.054683565  | 1.038631269 | 1.448509732  | 0.207143316 | 0.701104385 |
| Q6NVC0 | 2.829762722  | 2.789675276  | -0.040087446 | 0.972595994 | -0.79398316  | 0.463204982 | 0.783169648 | Q6NVC0 | 2.829762722  | 2.853077031  | 0.023314309  | 1.01629153  | 0.446851834  | 0.673672625 | 0.911250419 |
| Q6PJ43 | -0.459095338 | -0.400160759 | 0.058934578  | 1.04169619  | 1.724900178  | 0.145142385 | 0.599268681 | Q6PJ43 | -0.459095338 | -0.435132828 | 0.02396251   | 1.016748252 | 0.701064906  | 0.51453844  | 0.840204914 |
| RAB14  | 0.202476474  | 0.268382367  | 0.065905893  | 1.046742001 | 1.501226151  | 0.193598558 | 0.613333248 | RAB14  | 0.202476474  | 0.254592933  | 0.05211646   | 1.036784791 | 2.186695196  | 0.080431042 | 0.701104385 |
| RAB1A  | 0.578256511  | 0.699495269  | 0.121238758  | 1.087668379 | 3.131932272  | 0.025900904 | 0.599268681 | RAB1A  | 0.578256511  | 0.656308733  | 0.078052222  | 1.055591927 | 2.048036456  | 0.095882277 | 0.701104385 |
| RAB2A  | 0.334927032  | 0.439422232  | 0.1044952    | 1.07511814  | 2.818358618  | 0.037180389 | 0.599268681 | RAB2A  | 0.334927032  | 0.380291419  | 0.045364387  | 1.031943788 | 1.139728108  | 0.306037551 | 0.740068144 |
| RAB3A  | -0.147347373 | -0.13296107  | 0.014386303  | 1.01002171  | 0.803706368  | 0.458056577 | 0.783169648 | RAB3A  | -0.147347373 | -0.134124074 | 0.0132233    | 1.009207826 | 0.580055852  | 0.587033398 | 0.871305477 |
| RABE1  | -0.669566999 | -0.859437868 | -0.189870868 | 0.876684187 | -1.655428073 | 0.158741123 | 0.599268681 | RABE1  | -0.669566999 | -0.659655428 | 0.009911571  | 1.006893831 | 0.119560429  | 0.909486747 | 0.976856136 |
| RAC1   | 0.405754393  | 0.536708079  | 0.130953686  | 1.095017318 | 3.326871087  | 0.020850408 | 0.599268681 | RAC1   | 0.405754393  | 0.474505362  | 0.068750968  | 1.048808271 | 1.297611918  | 0.251058599 | 0.701104385 |
| RALA   | 0.355282456  | 0.371127376  | 0.01584492   | 1.011043395 | 0.404217714  | 0.702762568 | 0.889065396 | RALA   | 0.355282456  | 0.401272369  | 0.045989912  | 1.032391317 | 0.644760719  | 0.547494242 | 0.842273365 |
| RAN    | -1.715941528 | -1.720487966 | -0.004546438 | 0.99685361  | -0.067493878 | 0.94880438  | 0.97465736  | RAN    | -1.715941528 | -1.687655739 | 0.028285789  | 1.019799679 | 0.656002534  | 0.540804776 | 0.840204914 |
| RAP1A  | -0.037733261 | 0.118511453  | 0.156244715  | 1.11438266  | 3.247213966  | 0.022766158 | 0.599268681 | RAP1A  | -0.037733261 | -4.45E-05    | 0.037688741  | 1.026468063 | 0.816599945  | 0.451295146 | 0.838585027 |
| RB39A  | 0.006458608  | 0.048576904  | 0.042118295  | 1.029624505 | 1.003400111  | 0.361726135 | 0.726116715 | RB39A  | 0.006458608  | 0.07836478   | 0.071906172  | 1.051104546 | 1.638042018  | 0.162338832 | 0.701104385 |
| RGS7   | 0.819506925  | 0.826096021  | 0.006589097  | 1.004577659 | 0.192186551  | 0.855157789 | 0.93836189  | RGS7   | 0.819506925  | 0.900689584  | 0.081182659  | 1.057884894 | 1.465927417  | 0.202570402 | 0.701104385 |
| RHG01  | -0.380442108 | -0.458572508 | -0.0781304   | 0.947284445 | -0.554403053 | 0.603185851 | 0.855259588 | RHG01  | -0.380442108 | -0.298826311 | 0.081615797  | 1.058202548 | 0.697116796  | 0.516804378 | 0.840204914 |
| RHG35  | 0.152327709  | 0.107807848  | -0.044519862 | 0.969612457 | -0.393820039 | 0.709948072 | 0.89333644  | RHG35  | 0.152327709  | -0.06455135  | -0.21687906  | 0.860424756 | -1.926321588 | 0.112017163 | 0.701104385 |
| RHOA   | -0.500564456 | -0.397385296 | 0.10317916   | 1.074137854 | 1.661980589  | 0.157405882 | 0.599268681 | RHOA   | -0.500564456 | -0.495896773 | 0.004667684  | 1.003240631 | 0.076112467  | 0.942281256 | 0.984662387 |
| RHOB   | 0.958421234  | 1.012201353  | 0.05378012   | 1.03798106  | 0.846326397  | 0.435992204 | 0.768079723 | RHOB   | 0.958421234  | 1.025068169  | 0.066646936  | 1.0472798   | 1.087009569  | 0.326634246 | 0.744678133 |
| ROA2   | -1.983618632 | -1.989915859 | -0.006297227 | 0.995644607 | -0.063990269 | 0.951457479 | 0.97472682  | ROA2   | -1.983618632 | -1.912796381 | 0.070822251  | 1.05031513  | 1.460543181  | 0.203973574 | 0.701104385 |
| RP3A   | 0.727893472  | 0.54528709   | -0.182606382 | 0.881109739 | -1.714309215 | 0.147137453 | 0.599268681 | RP3A   | 0.727893472  | 0.597041897  | -0.130851576 | 0.913292205 | -1.258734262 | 0.263697965 | 0.710100947 |
| RTN1   | 0.594471585  | 0.664544821  | 0.070073236  | 1.049769972 | 1.793644661  | 0.132840115 | 0.599268681 | RTN1   | 0.594471585  | 0.646108685  | 0.051637101  | 1.036440359 | 0.993207503  | 0.36621196  | 0.772390839 |
| RTN4   | 0.375772121  | 0.416006997  | 0.040234877  | 1.028281221 | 1.599796859  | 0.170539855 | 0.599268681 | RTN4   | 0.375772121  | 0.36113987   | -0.01463225  | 0.989908957 | -0.654708757 | 0.541571883 | 0.840204914 |
| RUFY3  | 0.048185667  | 0.008284976  | -0.039900691 | 0.972721903 | -0.461852352 | 0.663585779 | 0.865646501 | RUFY3  | 0.048185667  | -0.01512916  | -0.063314827 | 0.957062584 | -0.719152414 | 0.504245122 | 0.840204914 |
| S12A5  | 1.004986488  | 1.117880264  | 0.112893776  | 1.081395138 | 1.737169376  | 0.142865205 | 0.599268681 | S12A5  | 1.004986488  | 1.045568674  | 0.040582186  | 1.028528796 | 0.659422565  | 0.538780433 | 0.840204914 |
| S4A4   | 0.640506557  | 0.770789083  | 0.130282525  | 1.09450802  | 1.535554328  | 0.18524253  | 0.613333248 | S4A4   | 0.640506557  | 0.69485922   | 0.054352663  | 1.038393072 | 0.722027622  | 0.502622181 | 0.840204914 |
| SAR1B  | -0.007938665 | -0.169240406 | -0.16130174  | 0.894217856 | -1.284549976 | 0.255241856 | 0.682883507 | SAR1B  | -0.007938665 | -0.106130482 | -0.098191816 | 0.93420313  | -1.250715151 | 0.266376182 | 0.712225677 |
| SC6A1  | 0.918235422  | 1.033074653  | 0.114839231  | 1.082854369 | 1.514412793  | 0.190346352 | 0.613333248 | SC6A1  | 0.918235422  | 1.044246869  | 0.126011447  | 1.091272535 | 1.861238155  | 0.121776853 | 0.701104385 |
| SCOT1  | -1.144938046 | -1.127134476 | 0.01780357   | 1.012416953 | 0.187401668  | 0.858713135 | 0.93836189  | SCOT1  | -1.144938046 | -1.040989556 | 0.10394849   | 1.074710801 | 1.377117662  | 0.226934324 | 0.701104385 |
| SDHA   | 0.508450898  | 0.55881814   | 0.050367241  | 1.035528487 | 0.887277177  | 0.415564049 | 0.761445491 | SDHA   | 0.508450898  | 0.586579587  | 0.078128688  | 1.055647877 | 1.134055637  | 0.30819814  | 0.740068144 |
| SDHB   | 0.679694164  | 0.725302759  | 0.045608594  | 1.032118482 | 0.860086792  | 0.429043488 | 0.7652291   | SDHB   | 0.679694164  | 0.659544427  | -0.020149737 | 0.986130349 | -0.430499032 | 0.684757955 | 0.915438826 |
| SEP11  | 0.371223159  | 0.608236039  | 0.237012881  | 1.17854993  | 2.206497338  | 0.078449532 | 0.599268681 | SEP11  | 0.371223159  | 0.495231219  | 0.124008061  | 1.089758201 | 1.1138635    | 0.31599741  | 0.744678133 |
| SEPT2  | 0.797274859  | 0.88936814   | 0.092093281  | 1.065915653 | 1.355148898  | 0.233374775 | 0.66152098  | SEPT2  | 0.797274859  | 0.79972887   | 0.002454011  | 1.001702438 | 0.031751161  | 0.975898953 | 0.994361906 |
| SEPT3  | 0.379368118  | 0.405772628  | 0.02640451   | 1.018470724 | 0.679183497  | 0.527182641 | 0.817484903 | SEPT3  | 0.379368118  | 0.424245758  | 0.04487764   | 1.031595682 | 1.329648336  | 0.241064642 | 0.701104385 |
| SEPT4  | 0.629942234  | 0.657012015  | 0.027069781  | 1.01894048  | 0.969948398  | 0.376619955 | 0.735677322 | SEPT4  | 0.629942234  | 0.642475716  | 0.012533482  | 1.008725394 | 0.377553789  | 0.721257757 | 0.940879496 |
| SEPT5  | 0.5982825    | 0.616230807  | 0.017948307  | 1.012518527 | 0.273574799  | 0.795352495 | 0.919848905 | SEPT5  | 0.5982825    | 0.543776274  | -0.054506225 | 0.962923956 | -0.96581027  | 0.378496776 | 0.784029036 |
| SEPT7  | 0.532150361  | 0.605261448  | 0.073111086  | 1.051982778 | 2.084897303  | 0.091490881 | 0.599268681 | SEPT7  | 0.532150361  | 0.572153305  | 0.040002944  | 1.028115924 | 1.284716606  | 0.255188091 | 0.707019134 |
| SEPT8  | 0.468546047  | 0.541884967  | 0.07333892   | 1.052148922 | 1.057826496  | 0.338540357 | 0.725189245 | SEPT8  | 0.468546047  | 0.517609073  | 0.049063026  | 1.034592778 | 0.439221789  | 0.678833485 | 0.914000799 |

|       |              |              |              |             |              |             |             |       |              |              |              |             |              |             |             |
|-------|--------------|--------------|--------------|-------------|--------------|-------------|-------------|-------|--------------|--------------|--------------|-------------|--------------|-------------|-------------|
| SEPT9 | 0.607380092  | 0.688682179  | 0.081302088  | 1.057972471 | 1.434364792  | 0.210929441 | 0.626144877 | SEPT9 | 0.607380092  | 0.675036223  | 0.067656131  | 1.04801265  | 0.54965528   | 0.606204218 | 0.883102462 |
| SERA  | -0.655764734 | -0.676516626 | -0.020751892 | 0.985718841 | -0.428393209 | 0.686192103 | 0.879057516 | SERA  | -0.655764734 | -0.636752457 | 0.019012277  | 1.013265523 | 0.475634182  | 0.654388986 | 0.894787818 |
| SH3G2 | -0.822609918 | -0.891160337 | -0.068550418 | 0.953595664 | -1.162538474 | 0.297482781 | 0.696820273 | SH3G2 | -0.822609918 | -0.894602201 | -0.071992283 | 0.951323365 | -0.972679604 | 0.375385395 | 0.781880077 |
| SHAN3 | 1.538738991  | 1.343350085  | -0.195388906 | 0.873337439 | -0.866132311 | 0.426017641 | 0.7652291   | SHAN3 | 1.538738991  | 1.201510511  | -0.33722848  | 0.791560496 | -1.484144158 | 0.197891399 | 0.701104385 |
| SHLB2 | -0.262745406 | -0.205473509 | 0.057271897  | 1.040496345 | 0.639499738  | 0.550643348 | 0.821069404 | SHLB2 | -0.262745406 | -0.225390149 | 0.037355257  | 1.026230819 | 0.404503828  | 0.702565336 | 0.929358357 |
| SNAA  | -0.046184578 | -0.035134786 | 0.011049792  | 1.007688538 | 0.272785148  | 0.795925946 | 0.919848905 | SNAA  | -0.046184578 | 0.005702829  | 0.051887407  | 1.036620196 | 1.956424832  | 0.107780004 | 0.701104385 |
| SNAB  | -0.226136129 | -0.17843935  | 0.047696778  | 1.033613471 | 0.796730039  | 0.461746207 | 0.783169648 | SNAB  | -0.226136129 | -0.22642397  | -0.000287841 | 0.999800503 | -0.005095367 | 0.99613155  | 0.997824096 |
| SNP25 | 1.29204684   | 1.270145472  | -0.021901369 | 0.984933777 | -0.18135891  | 0.863208549 | 0.940548044 | SNP25 | 1.29204684   | 1.237324451  | -0.054722389 | 0.962779688 | -0.351658464 | 0.739429058 | 0.948179438 |
| SNPH  | 0.92717298   | 0.928747324  | 0.001574344  | 1.001091848 | 0.014997503  | 0.988614207 | 0.996266494 | SNPH  | 0.92717298   | 0.92915331   | 0.00198033   | 1.001373602 | 0.025008201  | 0.981015814 | 0.996881299 |
| SPTA1 | 1.336734418  | 1.424645789  | 0.087911371  | 1.06283038  | 1.615926995  | 0.167032225 | 0.599268681 | SPTA1 | 1.336734418  | 1.368051975  | 0.031317558  | 1.021945002 | 0.548886614  | 0.606693734 | 0.883102462 |
| SPTB1 | 0.694574147  | 0.789254339  | 0.094680192  | 1.067828672 | 1.617529399  | 0.166687685 | 0.599268681 | SPTB1 | 0.694574147  | 0.794059738  | 0.099485591  | 1.071391378 | 2.02017773   | 0.099347762 | 0.701104385 |
| SRC   | 0.474381753  | 0.527037767  | 0.052656014  | 1.037172611 | 0.789566675  | 0.465557545 | 0.783169648 | SRC   | 0.474381753  | 0.556198556  | 0.081816804  | 1.058349995 | 1.350262567  | 0.234830337 | 0.701104385 |
| SRCN1 | 0.869685111  | 0.628892752  | -0.240792359 | 0.846280389 | -2.200693831 | 0.07902482  | 0.599268681 | SRCN1 | 0.869685111  | 0.691963564  | -0.177721547 | 0.884098153 | -1.15095199  | 0.301801532 | 0.740068144 |
| STIP1 | -0.917091725 | -1.012315693 | -0.095223968 | 0.936126909 | -2.283889194 | 0.071191022 | 0.599268681 | STIP1 | -0.917091725 | -0.977106161 | -0.060014436 | 0.959254521 | -1.498488296 | 0.1942805   | 0.701104385 |
| STX1A | 1.539932252  | 1.623809907  | 0.083877655  | 1.0598629   | 2.443706914  | 0.058386692 | 0.599268681 | STX1A | 1.539932252  | 1.644418833  | 0.104486581  | 1.075111717 | 2.219473099  | 0.077179363 | 0.701104385 |
| STX1B | 1.262590241  | 1.381904844  | 0.119314603  | 1.086218698 | 2.94423029   | 0.032099014 | 0.599268681 | STX1B | 1.262590241  | 1.306578398  | 0.043988157  | 1.030959855 | 0.759189992  | 0.481975772 | 0.840204914 |
| STXB1 | 0.273829559  | 0.414482926  | 0.140653367  | 1.102404259 | 3.307407252  | 0.021301096 | 0.599268681 | STXB1 | 0.273829559  | 0.274475946  | 0.000646387  | 1.000448141 | 0.019475326  | 0.985215194 | 0.997824096 |
| SUCB1 | -0.656432769 | -0.640774419 | 0.01565835   | 1.010912654 | 0.205646498  | 0.845177717 | 0.93836189  | SUCB1 | -0.656432769 | -0.684045789 | -0.02761302  | 0.981042118 | -0.342614417 | 0.745821948 | 0.949291667 |
| SV2A  | 0.849526677  | 0.928392706  | 0.078866029  | 1.056187541 | 2.535924707  | 0.052152041 | 0.599268681 | SV2A  | 0.849526677  | 0.864486237  | 0.014959561  | 1.010423124 | 0.360844939  | 0.732959823 | 0.946321415 |
| SYGP1 | 0.452952689  | -0.474734836 | -0.927687525 | 0.525700304 | -2.029635917 | 0.098156726 | 0.599268681 | SYGP1 | 0.452952689  | -0.08707231  | -0.540025    | 0.687758991 | -1.051128389 | 0.341324508 | 0.748135696 |
| SYN1  | 0.627376008  | 0.602418343  | -0.024957665 | 0.98284944  | -0.794848441 | 0.462745094 | 0.783169648 | SYN1  | 0.627376008  | 0.689700521  | 0.062324514  | 1.044146767 | 1.311924253  | 0.246547391 | 0.701104385 |
| SYN2  | 0.348044421  | 0.240378127  | -0.107666294 | 0.928088125 | -2.635738545 | 0.046212683 | 0.599268681 | SYN2  | 0.348044421  | 0.356280156  | 0.008235735  | 1.005724902 | 0.156912677  | 0.881452985 | 0.974509605 |
| SYNJ1 | -0.349614043 | -0.340122958 | 0.009491085  | 1.006600406 | 0.215021452  | 0.838245791 | 0.93836189  | SYNJ1 | -0.349614043 | -0.360899888 | -0.011285845 | 0.992207767 | -0.24643574  | 0.815142544 | 0.958518887 |
| SYT1  | 1.206376828  | 1.284063379  | 0.077686551  | 1.055324406 | 2.053172251  | 0.095257371 | 0.599268681 | SYT1  | 1.206376828  | 1.241608229  | 0.035231401  | 1.02472117  | 0.811863688  | 0.453770147 | 0.838585027 |
| SYT2  | 1.134647132  | 1.204012814  | 0.069365682  | 1.04925525  | 1.523324944  | 0.18817841  | 0.613333248 | SYT2  | 1.134647132  | 1.15086416   | 0.016217028  | 1.011304202 | 0.316178949  | 0.764639702 | 0.954130004 |
| SYT7  | 0.980766529  | 1.039181475  | 0.058414947  | 1.041321059 | 0.68719209   | 0.522530605 | 0.817222214 | SYT7  | 0.980766529  | 0.985621358  | 0.004854829  | 1.00337078  | 0.065382884  | 0.950402837 | 0.984662387 |
| TAU   | 0.703993257  | 0.758772031  | 0.054778773  | 1.038699814 | 0.908664352  | 0.405195493 | 0.759993537 | TAU   | 0.703993257  | 0.741023241  | 0.037029984  | 1.025999469 | 0.790611248  | 0.465000333 | 0.838780504 |
| TBA1A | -0.760196331 | -0.921895341 | -0.161699009 | 0.893971653 | -2.44856876  | 0.058038481 | 0.599268681 | TBA1A | -0.760196331 | -0.878893281 | -0.11869695  | 0.921019145 | -1.316090475 | 0.245248338 | 0.701104385 |
| TBB2A | -0.731350127 | -0.887673926 | -0.156323799 | 0.897308635 | -2.099282737 | 0.089834982 | 0.599268681 | TBB2A | -0.731350127 | -0.816828011 | -0.085477884 | 0.942472296 | -1.037295526 | 0.347135558 | 0.756474597 |
| TBB5  | -0.636862567 | -0.791820834 | -0.154958266 | 0.898158354 | -2.202976213 | 0.078798038 | 0.599268681 | TBB5  | -0.636862567 | -0.728991517 | -0.092128949 | 0.938137341 | -1.071276377 | 0.333007906 | 0.747299272 |
| TEBP  | -0.362374783 | -0.551221303 | -0.18884652  | 0.877306876 | -1.483148381 | 0.198144457 | 0.621403557 | TEBP  | -0.362374783 | -0.477121513 | -0.11474673  | 0.923544428 | -0.953041779 | 0.384335788 | 0.785904876 |
| TFR1  | 0.611700522  | 0.666327502  | 0.05462698   | 1.038590533 | 1.032856048  | 0.349018093 | 0.726116715 | TFR1  | 0.611700522  | 0.657839011  | 0.046138489  | 1.032497643 | 0.941132221  | 0.389847449 | 0.785904876 |
| TPIS  | -2.123990522 | -2.039861435 | 0.084129087  | 1.060047628 | 1.568261394  | 0.17760832  | 0.608712152 | TPIS  | -2.123990522 | -2.041683849 | 0.082306673  | 1.058709421 | 2.325981027  | 0.067548439 | 0.701104385 |
| UBA1  | -1.388989321 | -1.478385052 | -0.089395731 | 0.939916348 | -1.517060652 | 0.189699724 | 0.613333248 | UBA1  | -1.388989321 | -1.454153466 | -0.065164145 | 0.955836559 | -0.924350768 | 0.397721326 | 0.785904876 |
| UBE2N | -0.585821034 | -0.613759236 | -0.027938202 | 0.980821017 | -0.282974359 | 0.788537804 | 0.919848905 | UBE2N | -0.585821034 | -0.584299518 | 0.001521517  | 1.001055191 | 0.016431706  | 0.987525502 | 0.997824096 |
| UBP5  | -0.674986007 | -0.647563416 | 0.02742259   | 1.019189691 | 0.216212027  | 0.837366642 | 0.93836189  | UBP5  | -0.674986007 | -0.624577961 | 0.050408045  | 1.035557775 | 0.465454024  | 0.661175756 | 0.899867365 |
| UCLH1 | -1.758156811 | -1.728169499 | 0.029987312  | 1.021003146 | 0.32647938   | 0.757284642 | 0.915190738 | UCLH1 | -1.758156811 | -1.692417373 | 0.065739437  | 1.046621236 | 0.66750779   | 0.53401476  | 0.840204914 |
| USO1  | -0.28428398  | -0.168330301 | 0.115953679  | 1.083691172 | 1.478059705  | 0.199442521 | 0.621403557 | USO1  | -0.28428398  | -0.29779038  | -0.0135064   | 0.990681763 | -0.058083203 | 0.955932185 | 0.984662387 |
| VAPA  | 0.598557695  | 0.579406015  | -0.01915168  | 0.986812791 | -0.272639486 | 0.796031743 | 0.919848905 | VAPA  | 0.598557695  | 0.701215837  | 0.102658142  | 1.073750008 | 1.365657747  | 0.230272883 | 0.701104385 |
| VAPB  | 0.895699402  | 1.066220633  | 0.170521231  | 1.12546503  | 1.235634196  | 0.271479832 | 0.690387094 | VAPB  | 0.895699402  | 1.061469596  | 0.165770194  | 1.121764781 | 1.701131157  | 0.149658389 | 0.701104385 |
| VAT1L | -1.588392503 | -1.610864504 | -0.022472001 | 0.984544281 | -0.286249827 | 0.786168077 | 0.919848905 | VAT1L | -1.588392503 | -1.577331253 | 0.01106125   | 1.007696541 | 0.07696285   | 0.941637897 | 0.984662387 |
| VATA  | 0.184002432  | 0.255666197  | 0.071663764  | 1.05092795  | 1.614147193  | 0.167415734 | 0.599268681 | VATA  | 0.184002432  | 0.242405245  | 0.058402813  | 1.0413123   | 0.831558997  | 0.443544505 | 0.831921783 |
| VATB2 | 0.092973582  | 0.128990265  | 0.036016683  | 1.025279094 | 1.073512738  | 0.332095508 | 0.719846663 | VATB2 | 0.092973582  | 0.107846847  | 0.014873265  | 1.010362686 | 0.327969384  | 0.756223083 | 0.95032034  |
| VATC1 | 0.521675756  | 0.543330765  | 0.021655009  | 1.015123326 | 1.008684572  | 0.35941837  | 0.726116715 | VATC1 | 0.521675756  | 0.55607993   | 0.034404174  | 1.024133773 | 1.012017145  | 0.357969301 | 0.769774105 |

|       |              |              |              |             |              |             |             |       |              |              |              |             |              |             |             |
|-------|--------------|--------------|--------------|-------------|--------------|-------------|-------------|-------|--------------|--------------|--------------|-------------|--------------|-------------|-------------|
| VATD  | 0.301227284  | 0.343173952  | 0.041946667  | 1.029502025 | 1.278589909  | 0.257171807 | 0.682883507 | VATD  | 0.301227284  | 0.35400875   | 0.052781465  | 1.037262804 | 1.147291188  | 0.303177474 | 0.740068144 |
| VATE1 | 0.468683119  | 0.528162028  | 0.059478908  | 1.042089297 | 1.544342114  | 0.183160448 | 0.613333248 | VATE1 | 0.468683119  | 0.525464636  | 0.056781517  | 1.040142734 | 1.317892838  | 0.244688314 | 0.701104385 |
| VATH  | 0.188913597  | 0.237286795  | 0.048373199  | 1.034098204 | 2.309376951  | 0.068960833 | 0.599268681 | VATH  | 0.188913597  | 0.209304855  | 0.020391259  | 1.014234503 | 0.583938805  | 0.584611677 | 0.87114072  |
| VDAC1 | 0.844917675  | 0.881667803  | 0.036750128  | 1.025800463 | 0.960478495  | 0.380926174 | 0.738259164 | VDAC1 | 0.844917675  | 0.879750093  | 0.034832418  | 1.024437818 | 1.100558733  | 0.321229474 | 0.744678133 |
| VDAC2 | 1.409210401  | 1.421120833  | 0.011910432  | 1.008289855 | 0.315802793  | 0.764908837 | 0.918100283 | VDAC2 | 1.409210401  | 1.436494463  | 0.027284062  | 1.019091833 | 1.204465148  | 0.282308469 | 0.734002019 |
| VDAC3 | 1.288305088  | 1.322677407  | 0.034372319  | 1.024111161 | 0.82387121   | 0.447515122 | 0.781079635 | VDAC3 | 1.288305088  | 1.335640629  | 0.047335541  | 1.033354697 | 1.107921017  | 0.318325097 | 0.744678133 |
| VGLU1 | 0.966056309  | 0.959800193  | -0.006256116 | 0.995672979 | -0.189678195 | 0.857021111 | 0.93836189  | VGLU1 | 0.966056309  | 0.974493842  | 0.008437533  | 1.005865588 | 0.220402309  | 0.834274589 | 0.964789938 |
| VIME  | 0.098014599  | 0.293160774  | 0.195146175  | 1.144840151 | 1.743787907  | 0.141651791 | 0.599268681 | VIME  | 0.098014599  | 0.368856706  | 0.270842108  | 1.206511869 | 4.436446428  | 0.006787252 | 0.543407796 |
| VINC  | -0.528615929 | -0.541686822 | -0.013070893 | 0.990980866 | -0.125291638 | 0.905174439 | 0.963985208 | VINC  | -0.528615929 | -0.501685847 | 0.026930082  | 1.018841819 | 0.245167125  | 0.816071606 | 0.958518887 |
| VISL1 | 0.182859996  | 0.252499903  | 0.069639908  | 1.04945471  | 1.985117558  | 0.103896229 | 0.599268681 | VISL1 | 0.182859996  | 0.196265326  | 0.01340533   | 1.00933517  | 0.385017543  | 0.716058057 | 0.937339888 |
| VP26B | -0.509825679 | -0.30316979  | 0.206655889  | 1.154010131 | 3.689389941  | 0.014154612 | 0.599268681 | VP26B | -0.509825679 | -0.44236405  | 0.067461629  | 1.047871368 | 0.628916288  | 0.557013994 | 0.849889236 |
| VPP1  | 1.096101778  | 1.148748516  | 0.052646738  | 1.037165942 | 2.030959023  | 0.097991308 | 0.599268681 | VPP1  | 1.096101778  | 1.13226294   | 0.036161162  | 1.025381776 | 1.031820001  | 0.349458654 | 0.757160417 |
| VPS35 | -0.364275355 | -0.568504855 | -0.2042295   | 0.868002137 | -1.877028174 | 0.119331287 | 0.599268681 | VPS35 | -0.364275355 | -0.507564728 | -0.143289374 | 0.90545235  | -1.559237668 | 0.179683295 | 0.701104385 |
| XPOT  | -0.260091985 | -0.254469399 | 0.005622585  | 1.003904883 | 0.160762557  | 0.878573909 | 0.951788402 | XPOT  | -0.260091985 | -0.392241284 | -0.132149299 | 0.912471055 | -1.326287006 | 0.242095672 | 0.701104385 |
| ZNT1  | -0.680583194 | -0.606196734 | 0.07438646   | 1.052913164 | 0.68365298   | 0.52458296  | 0.817222214 | ZNT1  | -0.680583194 | -0.590531636 | 0.090051558  | 1.064408221 | 2.330180225  | 0.067196195 | 0.701104385 |

Reports the log 2 synaptosome protein levels for each animal as well as summary statistics for differences between the vehicle and haloperidol and vehicle and olanzapine groups.

**eTable 7. Eigenprotein Human Homogenate**

| HU    | Pair | Group | Green        | Orange       | MEgrey       | Turquoise    |
|-------|------|-------|--------------|--------------|--------------|--------------|
| 1326  | 1    | C     | -0.147093361 | 0.081487477  | -0.117021949 | 0.086066496  |
| 1247  | 2    | C     | -0.207965345 | 0.126750499  | 0.104092724  | 0.110611515  |
| 1086  | 3    | C     | 0.106207757  | -0.072912796 | -0.024010962 | -0.033909612 |
| 10005 | 4    | C     | 0.069516306  | -0.094265032 | 0.086577709  | 0.032609233  |
| 1201  | 5    | C     | -0.072706083 | -0.027329961 | -0.103707716 | 0.084729491  |
| 1255  | 6    | C     | -0.046967001 | 0.022328861  | -0.108524705 | 0.036016958  |
| 1480  | 7    | C     | -0.021590069 | 0.0311057    | -0.147212658 | 0.017334598  |
| 1119  | 8    | C     | -0.030930039 | 0.016364872  | 0.03119853   | 0.040751787  |
| 1317  | 9    | C     | -0.071960109 | 0.034983234  | 0.156101937  | 0.053304439  |
| 1307  | 10   | C     | 0.154834057  | -0.152050385 | 0.198167994  | 0.026960088  |
| 1067  | 11   | C     | 0.041609297  | -0.034603001 | 0.042649991  | -0.015732924 |
| 1196  | 12   | C     | -0.04633748  | 0.071875507  | 0.111678854  | 0.102115988  |
| 1099  | 13   | C     | 0.045418489  | -0.027097457 | -0.021865925 | 0.039249464  |
| 806   | 14   | C     | 0.021325206  | -0.01610117  | 0.04345694   | -0.176856598 |
| 739   | 15   | C     | 0.103975207  | -0.052436233 | 0.037826384  | -0.00745401  |
| 822   | 16   | C     | 0.069567555  | -0.187881385 | 0.161173598  | 0.105539763  |
| 727   | 17   | C     | 0.211774643  | -0.369826214 | -0.251680799 | 0.090474302  |
| 659   | 18   | C     | -0.090273529 | 0.073688848  | -0.003322558 | 0.076040232  |
| 852   | 19   | C     | -0.031756766 | 0.071170849  | 0.026622065  | -0.028795398 |
| 685   | 20   | C     | -0.061257753 | 0.034086106  | -0.101050207 | 0.049270468  |
| 686   | 21   | C     | 0.170727767  | -0.224800704 | 0.183874121  | -0.054142331 |
| 1092  | 22   | C     | -0.087621272 | -0.167392613 | -0.039323379 | 0.194229318  |
| 1488  | 23   | C     | -0.056272767 | 0.060791136  | 0.000288676  | -0.076405536 |
| 1047  | 24   | C     | -0.02241664  | -0.026534693 | 0.05114837   | 0.023797691  |
| 700   | 25   | C     | -0.168431469 | 0.077485843  | -0.020261227 | 0.145610888  |
| 818   | 26   | C     | -0.064847247 | 0.042303182  | 0.000156319  | 0.092761612  |
| 567   | 27   | C     | 0.018966017  | 0.017793752  | 0.029392962  | -0.0403977   |
| 871   | 28   | C     | 0.089537412  | -0.08183164  | -0.070934317 | -0.067240828 |
| 988   | 29   | C     | -0.06037878  | 0.074039871  | -0.028265975 | 0.02729534   |
| 1284  | 30   | C     | -0.09502581  | 0.118941017  | -0.035984233 | 0.066533955  |
| 1555  | 31   | C     | 0.16435534   | -0.209332193 | 0.055296208  | -0.069241634 |
| 1268  | 32   | C     | -0.027668198 | 0.058362239  | 0.112955338  | 0.022900738  |
| 1466  | 33   | C     | 0.124815857  | -0.036503376 | 0.1095008    | -0.05428341  |
| 1386  | 34   | C     | -0.18499641  | -0.004459069 | -0.081723562 | 0.230236088  |
| 1026  | 35   | C     | -0.084357009 | 0.040167928  | 0.131557869  | -0.036455047 |
| 1524  | 36   | C     | 0.05347205   | -0.030601337 | 0.027972626  | -0.044525181 |
| 1270  | 37   | C     | -0.12778084  | 0.063711826  | 0.094667826  | 0.132555607  |
| 1372  | 38   | C     | -0.1740693   | 0.125691136  | -0.020924039 | 0.104656772  |
| 1543  | 39   | C     | -0.059075691 | -0.042224525 | 0.023954842  | 0.133543258  |
| 1583  | 40   | C     | -0.038522176 | -0.000809787 | 0.021511464  | 0.029200188  |
| 1384  | 41   | C     | -0.050826489 | -0.013984699 | -0.003618687 | 0.106764496  |
| 630   | 42   | C     | -0.146323507 | 0.099857146  | -0.055186472 | 0.02027193   |

|       |    |    |              |              |              |              |
|-------|----|----|--------------|--------------|--------------|--------------|
| 546   | 43 | C  | 0.084706681  | -0.090036212 | -0.109108439 | 0.009242537  |
| 681   | 44 | C  | -0.007141738 | 0.06217158   | 0.077148191  | 0.01040199   |
| 1374  | 45 | C  | 0.00580186   | -0.070340461 | -0.139395233 | 0.100810862  |
| 1159  | 46 | C  | -0.063325552 | 0.036289932  | -0.141640005 | 0.110297418  |
| 857   | 47 | C  | 0.107382335  | -0.126250252 | -0.025108413 | -0.001534225 |
| 1391  | 48 | C  | -0.052763014 | 0.103133428  | 0.006032296  | -0.02154234  |
| 1453  | 1  | Sz | 0.039766762  | 0.067556862  | 0.031260603  | -0.108576017 |
| 1240  | 2  | Sz | 0.151342744  | -0.159416366 | -0.019250521 | 0.038505878  |
| 10025 | 3  | Sz | 0.061338428  | 0.050248585  | 0.045177995  | -0.056836904 |
| 1256  | 4  | Sz | 0.003900503  | -0.041943169 | 0.008115418  | -0.006605388 |
| 1189  | 5  | Sz | 0.048343034  | 0.057899927  | 0.016902136  | -0.138928675 |
| 10020 | 6  | Sz | 0.097368133  | -0.08469139  | -0.257118185 | -0.061872611 |
| 1263  | 7  | Sz | 0.091638395  | 0.070507643  | 0.020985951  | -0.158045539 |
| 1173  | 8  | Sz | -0.000134612 | 0.121655461  | 0.084571447  | -0.091893716 |
| 1361  | 9  | Sz | 0.256063733  | -0.04289306  | -0.002786734 | -0.343870088 |
| 10024 | 10 | Sz | -0.023200703 | -0.017577042 | -0.056226787 | 0.025527289  |
| 1296  | 11 | Sz | -0.054843674 | 0.132662924  | 0.033981522  | -0.018819813 |
| 1211  | 12 | Sz | -0.045832637 | 0.11754161   | 0.064805977  | 0.060340603  |
| 10023 | 13 | Sz | 0.023896727  | -0.100064524 | 0.02128783   | 0.115133618  |
| 665   | 14 | Sz | -0.143395291 | 0.127062014  | -0.043383855 | -0.006788857 |
| 1088  | 15 | Sz | -0.133664428 | 0.196967044  | -0.020402128 | -0.039978964 |
| 787   | 16 | Sz | 0.030088556  | -0.187154878 | 0.232848138  | 0.121416656  |
| 829   | 17 | Sz | 0.161968146  | -0.232406785 | 0.038163944  | 0.069482235  |
| 930   | 18 | Sz | -0.051767042 | 0.153160624  | -0.00358388  | -0.106361092 |
| 722   | 19 | Sz | -0.115347535 | 0.089725971  | 0.131219611  | 0.103600596  |
| 1105  | 20 | Sz | 0.006195555  | 0.02951946   | 0.061004033  | -0.018041622 |
| 802   | 21 | Sz | 0.207841653  | -0.08508038  | -0.266474885 | -0.203170661 |
| 1010  | 22 | Sz | 0.04457814   | -0.044448329 | -0.092443888 | -0.0554315   |
| 1222  | 23 | Sz | 0.066044859  | -0.102839982 | -0.031505238 | -0.108035693 |
| 933   | 24 | Sz | 0.09166865   | 0.033336512  | -0.173865554 | -0.142514199 |
| 625   | 25 | Sz | 0.014490105  | -0.093153668 | 0.252930478  | 0.080585626  |
| 917   | 26 | Sz | -0.048182835 | -0.058986994 | -0.103226599 | -0.026590556 |
| 537   | 27 | Sz | 0.035572877  | -0.050084367 | -0.014507181 | 0.084815811  |
| 878   | 28 | Sz | 0.038891219  | -0.002040476 | -0.050728376 | -0.062934955 |
| 621   | 29 | Sz | -0.081759251 | 0.029756714  | -0.128027942 | -0.001409921 |
| 1188  | 30 | Sz | -0.020366235 | 0.029635843  | 0.031580778  | -0.00265187  |
| 1649  | 31 | Sz | 0.06529892   | -0.034515141 | -0.156217085 | -0.032189192 |
| 1230  | 32 | Sz | -0.192652151 | 0.182882135  | 0.042284408  | 0.11448247   |
| 1341  | 33 | Sz | -0.013938826 | 0.09005222   | -0.078523644 | -0.068934158 |
| 1420  | 34 | Sz | -0.093087577 | -0.073875724 | -0.018944502 | 0.298539208  |
| 1454  | 35 | Sz | 0.103169992  | 0.060923639  | -0.117258311 | -0.179579184 |
| 1542  | 36 | Sz | 0.025524974  | 0.021065761  | -0.038842572 | -0.113031633 |
| 1579  | 37 | Sz | -0.168659681 | 0.210196796  | -0.093001363 | -0.059620042 |
| 1581  | 38 | Sz | -0.122167268 | -0.004406934 | 0.049397332  | 0.09927945   |



|       |    |                 |              |              |              |              |
|-------|----|-----------------|--------------|--------------|--------------|--------------|
| 10026 | 39 | Sz              | 0.114879039  | -0.137052293 | 0.078927295  | -0.03676044  |
| 1686  | 40 | Sz              | 0.037301001  | -0.035502126 | 0.234663791  | -0.022267841 |
| 1712  | 41 | Sz              | -0.014282831 | 0.096019516  | 0.06684343   | -0.129038467 |
| 566   | 42 | Sz              | 0.01421084   | 0.072606179  | 0.039700547  | -0.045687807 |
| 587   | 43 | Sz              | 0.2578096    | -0.09426536  | 0.122265701  | -0.284059558 |
| 640   | 44 | Sz              | 0.032939984  | 0.043895541  | 0.080071436  | -0.001983533 |
| 904   | 45 | Sz              | -0.084975988 | 0.121375237  | -0.190493771 | -0.007101419 |
| 1314  | 46 | Sz              | 0.06837357   | 0.121840447  | -0.091434875 | -0.187300678 |
| 1455  | 47 | Sz              | 0.139507868  | -0.057201674 | -0.064148376 | -0.082700344 |
| 1506  | 48 | Sz              | -0.165067833 | 0.026529223  | 0.048273277  | 0.014234764  |
|       |    |                 | Green        | Orange       | MEgrey       | Turquoise    |
|       |    | Control Avg     | -0.015764325 | -0.012812984 | 0.005731941  | 0.037159765  |
|       |    | Sz Avg          | 0.015764325  | 0.012812984  | -0.005731941 | -0.037159765 |
|       |    |                 |              |              |              |              |
|       |    | Sz-Control Dif  | 0.03152865   | 0.025625968  | -0.011463882 | -0.074319531 |
|       |    |                 |              |              |              |              |
|       |    | ttest, Paired   | 0.09033951   | 0.116511217  | 0.592408888  | 6.99435E-05  |
|       |    | ttest, unpaired | 0.132946451  | 0.222934576  | 0.586794285  | 0.000265729  |

**eTable 8. Eigenprotein Human Synaptosome**

| HU    | Pair | Group | Magenta      | Dark Red     | grey         | Blue         |
|-------|------|-------|--------------|--------------|--------------|--------------|
| 1386  | 34   | C     | -0.133081148 | 0.076676132  | -0.11673322  | 0.161714568  |
| 1247  | 2    | C     | 0.032110063  | -0.168112256 | -0.190225102 | 0.065493628  |
| 1086  | 3    | C     | 0.042220669  | -0.017157385 | -0.040416769 | 0.117297875  |
| 10005 | 4    | C     | 0.065977391  | -0.027604381 | 0.016194388  | 0.082128647  |
| 1201  | 5    | C     | 0.024795193  | -0.201730824 | 0.004015132  | -0.033338398 |
| 1255  | 6    | C     | -0.091311768 | -0.088779331 | -0.057230231 | -0.212283026 |
| 1480  | 7    | C     | 0.11616745   | 0.044682976  | -0.033800214 | 0.026661317  |
| 1119  | 8    | C     | 0.061908958  | 0.045113873  | -0.003212218 | 0.033804446  |
| 1317  | 9    | C     | 0.064319217  | -0.069259518 | -0.064307733 | 0.032351183  |
| 1307  | 10   | C     | 0.0448139    | 0.10392652   | 0.079935758  | -0.000277111 |
| 1067  | 11   | C     | 0.02185699   | 0.053492059  | 0.045330612  | 0.041219075  |
| 1196  | 12   | C     | 0.077967417  | 0.030453154  | 0.038196613  | 0.000580692  |
| 1099  | 13   | C     | 0.060114605  | -0.011666345 | -0.132877498 | 0.059183582  |
| 806   | 14   | C     | 0.01310182   | 0.043856681  | -0.031896855 | 0.056336452  |
| 739   | 15   | C     | 0.037617306  | 0.077744841  | -0.073091214 | 0.000939691  |
| 822   | 16   | C     | 0.099211751  | 0.020605684  | -0.006169339 | 0.064775963  |
| 727   | 17   | C     | 0.062501743  | 0.038975208  | 0.267605523  | 0.147746519  |
| 659   | 18   | C     | 0.095301934  | -0.021262458 | 0.041087284  | 0.089064704  |
| 852   | 19   | C     | 0.061018777  | 0.013238127  | 0.06962403   | 0.056553523  |
| 685   | 20   | C     | 0.081222368  | -0.019942439 | -0.021642665 | 0.091659876  |
| 686   | 21   | C     | -0.327572633 | 0.273878817  | -0.079772297 | 0.045413015  |
| 1092  | 22   | C     | 0.013230183  | -0.033831546 | -0.008978327 | 0.115742258  |

|       |    |    |              |              |              |              |
|-------|----|----|--------------|--------------|--------------|--------------|
| 1488  | 23 | C  | 0.139843718  | -0.109524298 | -0.115576101 | -0.071547363 |
| 1047  | 24 | C  | 0.022324648  | 0.008531097  | 0.064355685  | 0.119243069  |
| 700   | 25 | C  | 0.085667072  | -0.025802272 | 0.130146886  | 0.039883641  |
| 818   | 26 | C  | 0.020916078  | 0.016614725  | 0.026684758  | -0.051439763 |
| 567   | 27 | C  | 0.070706468  | 0.020941281  | 0.064043012  | 0.052372763  |
| 871   | 28 | C  | 0.060359363  | 0.0539826    | -0.011119055 | 0.009218875  |
| 988   | 29 | C  | -0.150995618 | -0.063532151 | 0.035726863  | 0.153502982  |
| 1284  | 30 | C  | 0.060525817  | -0.056659903 | 0.086840615  | 0.108474542  |
| 1555  | 31 | C  | 0.032883937  | 0.128816345  | 0.049024688  | 0.056172931  |
| 1268  | 32 | C  | 0.069882726  | -0.038753559 | 0.163797609  | 0.122064182  |
| 1466  | 33 | C  | 0.07814484   | 0.054186923  | 0.098529726  | 0.022529111  |
| 1026  | 35 | C  | -0.267795477 | 0.3481328    | -0.107942328 | -0.33740545  |
| 1524  | 36 | C  | 0.075722895  | -0.004795185 | 0.072289016  | -0.017448017 |
| 1270  | 37 | C  | -0.026822585 | 0.055554868  | -0.018200863 | 0.150885224  |
| 1372  | 38 | C  | -0.040041219 | -0.059700331 | -0.129013817 | 0.00252878   |
| 1543  | 39 | C  | 0.030103387  | -0.022477589 | -0.117211824 | 0.131512557  |
| 1583  | 40 | C  | 0.024416899  | 0.159045802  | 0.126516109  | -0.061777899 |
| 1384  | 41 | C  | 0.044732286  | 0.048659549  | 0.064424971  | 0.086673414  |
| 630   | 42 | C  | 0.053587042  | 0.039679055  | -0.025132109 | 0.073483284  |
| 546   | 43 | C  | 0.109676442  | 0.032718113  | -0.020837446 | -0.011529128 |
| 681   | 44 | C  | 0.020721427  | 0.006926371  | -0.117441996 | 0.151754059  |
| 1374  | 45 | C  | 0.010023128  | 0.093493557  | 0.044835521  | 0.057777591  |
| 1159  | 46 | C  | -0.226013056 | 0.180811912  | -0.041625316 | 0.042151127  |
| 857   | 47 | C  | -0.300687887 | 0.204966628  | 0.023755173  | -0.048695899 |
| 1391  | 48 | C  | 0.03555779   | 0.011212614  | -0.124639034 | -0.009170496 |
| 1453  | 1  | Sz | -0.034081726 | 0.058396228  | 0.038983744  | -0.028856721 |
| 1240  | 2  | Sz | 0.038023023  | -0.143420218 | -0.060705309 | 0.002154344  |
| 10025 | 3  | Sz | -0.159121971 | 0.268341135  | 0.032092743  | -0.095788268 |
| 1256  | 4  | Sz | 0.042035972  | 0.078653436  | -0.046776728 | 0.029778342  |
| 1189  | 5  | Sz | -0.17640858  | -0.017877223 | 0.035862387  | 0.09996      |
| 10020 | 6  | Sz | -0.066928639 | -0.097876331 | -0.071131451 | -0.151034693 |
| 1263  | 7  | Sz | -0.007182257 | 0.102830609  | 0.07457735   | -0.116260841 |
| 1173  | 8  | Sz | 0.04011247   | 0.050954745  | 0.045115176  | -0.024482594 |
| 1361  | 9  | Sz | 0.090771935  | -0.019501701 | 0.011934997  | 0.033038906  |
| 10024 | 10 | Sz | -0.14219568  | -0.058499005 | -0.178497394 | -0.103807753 |
| 1296  | 11 | Sz | 0.085196972  | -0.16277172  | -0.045756286 | -0.001258914 |
| 1211  | 12 | Sz | 0.104169244  | -0.0507146   | -0.062464018 | -0.050569008 |
| 10023 | 13 | Sz | -0.202651091 | -0.035186683 | 0.168923064  | -0.001283202 |
| 665   | 14 | Sz | 0.079440924  | 0.023561548  | -0.006345133 | -0.045537936 |
| 1088  | 15 | Sz | 0.059994228  | -0.052820119 | -0.061078807 | -0.147556288 |
| 787   | 16 | Sz | 0.084572249  | -0.044758356 | -0.037450166 | 0.083242589  |
| 829   | 17 | Sz | -0.10438793  | 0.07112561   | 0.103890847  | -0.059704788 |
| 930   | 18 | Sz | 0.095609154  | -0.142749025 | -0.100470343 | -0.208739293 |
| 722   | 19 | Sz | 0.047124496  | 0.035843469  | 0.084376637  | 0.003780784  |

|       |    |                 |              |              |              |              |
|-------|----|-----------------|--------------|--------------|--------------|--------------|
| 1105  | 20 | Sz              | -0.020184186 | -0.025444807 | -0.185248851 | -0.067251706 |
| 802   | 21 | Sz              | -0.207381819 | -0.106030963 | 0.269425757  | 0.174799127  |
| 1010  | 22 | Sz              | 0.03925648   | -0.214956075 | -0.044830471 | -0.042501552 |
| 1222  | 23 | Sz              | 0.040874782  | -0.074804181 | -0.078465722 | -0.084776447 |
| 933   | 24 | Sz              | 0.045443796  | -0.204880789 | 0.369256925  | -0.053489933 |
| 625   | 25 | Sz              | 0.048643632  | -0.043182239 | 0.085214244  | -0.028638732 |
| 917   | 26 | Sz              | 0.015778079  | -0.056895009 | -0.19698361  | -0.186218598 |
| 537   | 27 | Sz              | 0.072549388  | -0.048569003 | 0.131198071  | -0.059255633 |
| 878   | 28 | Sz              | 0.039535327  | 0.063411252  | 0.034936171  | -0.019164126 |
| 621   | 29 | Sz              | -0.176202317 | -0.070239943 | 0.056436074  | 0.037533012  |
| 1188  | 30 | Sz              | 0.038111371  | -0.052672601 | -0.106211612 | -0.183907577 |
| 1649  | 31 | Sz              | -0.076557931 | 0.061954701  | 0.066896038  | 0.200339926  |
| 1230  | 32 | Sz              | 0.105140218  | -0.230700231 | -0.155353318 | -0.012519166 |
| 1341  | 33 | Sz              | 0.020032661  | 0.059975229  | -0.092960074 | -0.006171628 |
| 1454  | 35 | Sz              | 0.15076679   | -0.218740575 | 0.086968795  | -0.23277815  |
| 1542  | 36 | Sz              | 0.054050233  | 0.022589869  | 0.006794332  | -0.037008797 |
| 1579  | 37 | Sz              | -0.085253101 | 0.055304083  | -0.040157384 | 0.088906898  |
| 1581  | 38 | Sz              | -0.162022283 | 0.136252629  | 0.023739171  | -0.009174557 |
| 10026 | 39 | Sz              | 0.035919233  | -0.060476796 | 0.13943647   | 0.134728059  |
| 1686  | 40 | Sz              | -0.072490082 | 0.100040488  | 0.01987874   | -0.247874294 |
| 1712  | 41 | Sz              | 0.017471058  | -0.044660862 | 0.052266603  | -0.142598773 |
| 566   | 42 | Sz              | 0.074651849  | -0.189378283 | 0.002452681  | -0.078848219 |
| 587   | 43 | Sz              | 0.046749804  | 0.007948943  | 0.07121839   | 0.034122751  |
| 640   | 44 | Sz              | 0.027742608  | -0.01131238  | -0.037036303 | 0.032727832  |
| 904   | 45 | Sz              | -0.041950918 | 0.065966212  | -0.01574081  | -0.207894844 |
| 1314  | 46 | Sz              | -0.212689382 | -0.110383596 | -0.097134066 | 0.076748262  |
| 1455  | 47 | Sz              | -0.223058131 | 0.051579827  | 0.079346585  | 0.013069031  |
| 1506  | 48 | Sz              | -0.025952262 | 0.02844676   | -0.294290532 | -0.123959431 |
|       |    |                 | Magenta      | Dark Red     | grey         | Blue         |
|       |    | Control Avg     | 0.011849624  | 0.026517586  | -0.001619864 | 0.038595374  |
|       |    | Sz Avg          | -0.011849624 | -0.026517586 | 0.001619864  | -0.038595374 |
|       |    |                 |              |              |              |              |
|       |    | Sz-Control Dif  | -0.023699247 | -0.053035172 | 0.003239728  | -0.077190749 |
|       |    |                 |              |              |              |              |
|       |    | ttest, Paired   | 0.091867241  | 0.014753534  | 0.997221737  | 2.70796E-05  |
|       |    | ttest, unpaired | 0.126166738  | 0.014038861  | 0.879312945  | 1.34302E-05  |

**eTable 9. Homogenate Modules DAVID**

| <b>Green</b>     |                  |                                                              |           |              |              |          |                |                  |
|------------------|------------------|--------------------------------------------------------------|-----------|--------------|--------------|----------|----------------|------------------|
| <b>Sublist</b>   | <b>Category</b>  | <b>Term</b>                                                  | <b>RT</b> | <b>Genes</b> | <b>Count</b> | <b>%</b> | <b>P-Value</b> | <b>Benjamini</b> |
|                  | UP_KEYWORDS      | <b>Calmodulin-binding</b>                                    | RT        |              | 11           | 8.9      | 2.10E-04       | 4.40E-02         |
|                  | GOTERM_MF_DIRECT | <b>calmodulin binding</b>                                    | RT        |              | 12           | 9.8      | 6.80E-04       | 1.90E-01         |
|                  | GOTERM_MF_DIRECT | <b>structural molecule activity</b>                          | RT        |              | 14           | 11.4     | 2.40E-03       | 3.10E-01         |
|                  | UP_KEYWORDS      | <b>Cytoskeleton</b>                                          | RT        |              | 34           | 27.6     | 3.00E-03       | 2.70E-01         |
|                  | UP_KEYWORDS      | <b>Microtubule</b>                                           | RT        |              | 11           | 8.9      | 7.60E-03       | 4.10E-01         |
|                  | UP_SEQ_FEATURE   | <b>region of interest:Calmodulin-binding</b>                 | RT        |              | 7            | 5.7      | 1.20E-02       | 1.00E+00         |
|                  | GOTERM_CC_DIRECT | <b>microtubule</b>                                           | RT        |              | 12           | 9.8      | 1.90E-02       | 9.90E-01         |
|                  | GOTERM_BP_DIRECT | <b>cell division</b>                                         | RT        |              | 11           | 8.9      | 2.20E-02       | 1.00E+00         |
|                  | GOTERM_MF_DIRECT | <b>actin binding</b>                                         | RT        |              | 11           | 8.9      | 2.20E-02       | 9.00E-01         |
|                  | GOTERM_CC_DIRECT | <b>plasma membrane</b>                                       | RT        |              | 68           | 55.3     | 2.40E-02       | 9.60E-01         |
|                  | UP_KEYWORDS      | <b>Cytoplasm</b>                                             | RT        |              | 69           | 56.1     | 2.50E-02       | 7.40E-01         |
|                  | KEGG_PATHWAY     | <b>Synaptic vesicle cycle</b>                                | RT        |              | 13           | 10.6     | 2.90E-02       | 9.90E-01         |
|                  | UP_KEYWORDS      | <b>Phosphoprotein</b>                                        | RT        |              | 105          | 85.4     | 3.30E-02       | 7.50E-01         |
|                  | GOTERM_MF_DIRECT | <b>protein homodimerization activity</b>                     | RT        |              | 12           | 9.8      | 4.20E-02       | 9.60E-01         |
|                  | UP_KEYWORDS      | <b>Lipid-binding</b>                                         | RT        |              | 8            | 6.5      | 4.20E-02       | 7.80E-01         |
|                  | UP_SEQ_FEATURE   | <b>mutagenesis site</b>                                      | RT        |              | 27           | 22       | 4.60E-02       | 1.00E+00         |
|                  | UP_SEQ_FEATURE   | <b>splice variant</b>                                        | RT        |              | 64           | 52       | 4.70E-02       | 1.00E+00         |
|                  |                  |                                                              |           |              |              |          |                |                  |
| <b>Orange</b>    |                  |                                                              |           |              |              |          |                |                  |
| <b>Sublist</b>   | <b>Category</b>  | <b>Term</b>                                                  | <b>RT</b> | <b>Genes</b> | <b>Count</b> | <b>%</b> | <b>P-Value</b> | <b>Benjamini</b> |
|                  | UP_KEYWORDS      | <b>Methylation</b>                                           | RT        |              | 24           | 24.7     | 7.60E-03       | 7.50E-01         |
|                  | UP_KEYWORDS      | <b>Protein transport</b>                                     | RT        |              | 14           | 14.4     | 1.30E-02       | 7.00E-01         |
|                  | GOTERM_BP_DIRECT | <b>heart development</b>                                     | RT        |              | 5            | 5.2      | 1.40E-02       | 1.00E+00         |
|                  | GOTERM_BP_DIRECT | <b>vesicle-mediated transport</b>                            | RT        |              | 10           | 10.3     | 1.50E-02       | 1.00E+00         |
|                  | GOTERM_BP_DIRECT | <b>signal transduction</b>                                   | RT        |              | 19           | 19.6     | 2.80E-02       | 1.00E+00         |
|                  | UP_SEQ_FEATURE   | <b>lipid moiety-binding region:S-geranylgeranyl cysteine</b> | RT        |              | 7            | 7.2      | 4.50E-02       | 1.00E+00         |
|                  | UP_KEYWORDS      | <b>Prenylation</b>                                           | RT        |              | 8            | 8.2      | 4.50E-02       | 9.40E-01         |
|                  | GOTERM_BP_DIRECT | <b>positive regulation of GTPase activity</b>                | RT        |              | 13           | 13.4     | 4.90E-02       | 1.00E+00         |
| <b>Turquoise</b> |                  |                                                              |           |              |              |          |                |                  |

| Sublist | Category         | Term                                           | RT | Genes | Count | %    | P-Value  | Benjamini |
|---------|------------------|------------------------------------------------|----|-------|-------|------|----------|-----------|
|         | UP_KEYWORDS      | Mitochondrion                                  | RT |       | 34    | 25.4 | 7.50E-06 | 1.70E-03  |
|         | UP_KEYWORDS      | Transit peptide                                | RT |       | 22    | 16.4 | 5.50E-05 | 6.10E-03  |
|         | UP_SEQ_FEATURE   | transit peptide:Mitochondrion                  | RT |       | 22    | 16.4 | 5.50E-05 | 2.30E-02  |
|         | GOTERM_CC_DIRECT | mitochondrial inner membrane                   | RT |       | 20    | 14.9 | 2.40E-04 | 6.10E-02  |
|         | UP_KEYWORDS      | Mitochondrion inner membrane                   | RT |       | 15    | 11.2 | 3.00E-04 | 2.20E-02  |
|         | UP_KEYWORDS      | Acetylation                                    | RT |       | 82    | 61.2 | 5.30E-04 | 2.90E-02  |
|         | GOTERM_CC_DIRECT | mitochondrial matrix                           | RT |       | 16    | 11.9 | 6.50E-04 | 8.10E-02  |
|         | GOTERM_CC_DIRECT | mitochondrion                                  | RT |       | 40    | 29.9 | 8.30E-03 | 5.10E-01  |
|         | GOTERM_CC_DIRECT | extracellular exosome                          | RT |       | 74    | 55.2 | 1.40E-02 | 5.90E-01  |
|         | GOTERM_BP_DIRECT | tricarboxylic acid cycle                       | RT |       | 9     | 6.7  | 1.80E-02 | 1.00E+00  |
|         | GOTERM_BP_DIRECT | positive regulation of protein phosphorylation | RT |       | 7     | 5.2  | 1.90E-02 | 1.00E+00  |
|         | GOTERM_BP_DIRECT | carbohydrate metabolic process                 | RT |       | 8     | 6    | 3.70E-02 | 1.00E+00  |
|         | GOTERM_CC_DIRECT | nucleus                                        | RT |       | 46    | 34.3 | 4.00E-02 | 8.80E-01  |
|         | GOTERM_BP_DIRECT | viral process                                  | RT |       | 11    | 8.2  | 4.00E-02 | 1.00E+00  |
|         | GOTERM_BP_DIRECT | sensory perception of pain                     | RT |       | 7     | 5.2  | 4.10E-02 | 1.00E+00  |
|         | GOTERM_CC_DIRECT | caveola                                        | RT |       | 7     | 5.2  | 4.10E-02 | 8.40E-01  |
|         | UP_KEYWORDS      | Tricarboxylic acid cycle                       | RT |       | 7     | 5.2  | 4.20E-02 | 8.50E-01  |
|         | GOTERM_BP_DIRECT | response to wounding                           | RT |       | 5     | 3.7  | 4.50E-02 | 1.00E+00  |
|         | GOTERM_BP_DIRECT | generation of precursor metabolites and energy | RT |       | 5     | 3.7  | 4.50E-02 | 1.00E+00  |
|         | GOTERM_MF_DIRECT | structural constituent of ribosome             | RT |       | 6     | 4.5  | 4.50E-02 | 1.00E+00  |
|         | UP_SEQ_FEATURE   | repeat:Solcar 3                                | RT |       | 6     | 4.5  | 4.50E-02 | 1.00E+00  |
|         | UP_SEQ_FEATURE   | repeat:Solcar 1                                | RT |       | 6     | 4.5  | 4.50E-02 | 1.00E+00  |
|         | UP_SEQ_FEATURE   | repeat:Solcar 2                                | RT |       | 6     | 4.5  | 4.50E-02 | 1.00E+00  |
|         | UP_KEYWORDS      | Electron transport                             | RT |       | 5     | 3.7  | 4.50E-02 | 8.20E-01  |

**eTable 10. Synaptosome Modules DAVID**

| Blue    |                  |                                        |    |       |       |      |          |           |
|---------|------------------|----------------------------------------|----|-------|-------|------|----------|-----------|
| Sublist | Category         | Term                                   | RT | Genes | Count | %    | P-Value  | Benjamini |
|         | GOTERM_CC_DIRECT | mitochondrial inner membrane           | RT |       | 20    | 31.7 | 2.30E-10 | 3.90E-08  |
|         | UP_KEYWORDS      | Mitochondrion inner membrane           | RT |       | 16    | 25.4 | 4.10E-10 | 6.20E-08  |
|         | UP_KEYWORDS      | Mitochondrion                          | RT |       | 27    | 42.9 | 6.10E-10 | 4.70E-08  |
|         | UP_KEYWORDS      | Transmembrane                          | RT |       | 31    | 49.2 | 3.80E-06 | 1.90E-04  |
|         | GOTERM_BP_DIRECT | transport                              | RT |       | 14    | 22.2 | 3.90E-06 | 2.40E-03  |
|         | GOTERM_CC_DIRECT | integral component of membrane         | RT |       | 30    | 47.6 | 5.30E-06 | 4.40E-04  |
|         | UP_KEYWORDS      | Ion channel                            | RT |       | 11    | 17.5 | 7.20E-06 | 2.80E-04  |
|         | KEGG_PATHWAY     | Parkinson's disease                    | RT |       | 12    | 19   | 7.40E-06 | 9.50E-04  |
|         | UP_SEQ_FEATURE   | transmembrane region                   | RT |       | 28    | 44.4 | 8.60E-06 | 2.40E-03  |
|         | GOTERM_BP_DIRECT | translation                            | RT |       | 8     | 12.7 | 1.30E-05 | 3.90E-03  |
|         | UP_KEYWORDS      | Transport                              | RT |       | 30    | 47.6 | 2.40E-05 | 7.20E-04  |
|         | KEGG_PATHWAY     | Huntington's disease                   | RT |       | 14    | 22.2 | 3.20E-05 | 2.00E-03  |
|         | UP_KEYWORDS      | Ion transport                          | RT |       | 17    | 27   | 4.60E-05 | 1.20E-03  |
|         | INTERPRO         | Mitochondrial carrier domain           | RT |       | 7     | 11.1 | 6.90E-05 | 1.50E-02  |
|         | INTERPRO         | Mitochondrial substrate/solute carrier | RT |       | 7     | 11.1 | 6.90E-05 | 1.50E-02  |
|         | UP_SEQ_FEATURE   | repeat:Solcar 2                        | RT |       | 7     | 11.1 | 7.30E-05 | 1.00E-02  |
|         | UP_SEQ_FEATURE   | repeat:Solcar 1                        | RT |       | 7     | 11.1 | 7.30E-05 | 1.00E-02  |
|         | UP_SEQ_FEATURE   | repeat:Solcar 3                        | RT |       | 7     | 11.1 | 7.30E-05 | 1.00E-02  |
|         | GOTERM_MF_DIRECT | structural constituent of ribosome     | RT |       | 7     | 11.1 | 7.70E-05 | 1.40E-02  |
|         | UP_KEYWORDS      | Transmembrane helix                    | RT |       | 28    | 44.4 | 8.40E-05 | 1.80E-03  |
|         | GOTERM_CC_DIRECT | mitochondrion                          | RT |       | 26    | 41.3 | 2.90E-04 | 1.60E-02  |
|         | UP_KEYWORDS      | Membrane                               | RT |       | 49    | 77.8 | 3.00E-04 | 5.70E-03  |
|         | UP_KEYWORDS      | Ligand-gated ion channel               | RT |       | 8     | 12.7 | 3.30E-04 | 5.60E-03  |
|         | UP_KEYWORDS      | Receptor                               | RT |       | 12    | 19   | 4.40E-04 | 6.80E-03  |
|         | UP_KEYWORDS      | Disease mutation                       | RT |       | 30    | 47.6 | 8.10E-04 | 1.10E-02  |
|         | GOTERM_CC_DIRECT | mitochondrial outer membrane           | RT |       | 8     | 12.7 | 1.40E-03 | 5.50E-02  |
|         | KEGG_PATHWAY     | Nicotine addiction                     | RT |       | 8     | 12.7 | 1.40E-03 | 5.70E-02  |

|  |                         |                                                                |    |  |    |      |          |          |
|--|-------------------------|----------------------------------------------------------------|----|--|----|------|----------|----------|
|  | <b>UP_KEYWORDS</b>      | <b>Mitochondrion outer membrane</b>                            | RT |  | 7  | 11.1 | 1.50E-03 | 1.90E-02 |
|  | <b>INTERPRO</b>         | <b>Mitochondrial carrier protein</b>                           | RT |  | 5  | 7.9  | 2.40E-03 | 2.20E-01 |
|  | <b>GOTERM_CC_DIRECT</b> | <b>postsynaptic membrane</b>                                   | RT |  | 12 | 19   | 2.90E-03 | 9.10E-02 |
|  | <b>UP_KEYWORDS</b>      | <b>Postsynaptic cell membrane</b>                              | RT |  | 11 | 17.5 | 3.00E-03 | 3.40E-02 |
|  | <b>UP_SEQ_FEATURE</b>   | <b>sequence variant</b>                                        | RT |  | 50 | 79.4 | 3.30E-03 | 2.60E-01 |
|  | <b>KEGG_PATHWAY</b>     | <b>Neuroactive ligand-receptor interaction</b>                 | RT |  | 8  | 12.7 | 3.90E-03 | 1.20E-01 |
|  | <b>GOTERM_CC_DIRECT</b> | <b>integral component of plasma membrane</b>                   | RT |  | 13 | 20.6 | 4.60E-03 | 1.20E-01 |
|  | <b>GOTERM_BP_DIRECT</b> | <b>chloride transmembrane transport</b>                        | RT |  | 5  | 7.9  | 6.70E-03 | 7.50E-01 |
|  | <b>KEGG_PATHWAY</b>     | <b>Calcium signaling pathway</b>                               | RT |  | 10 | 15.9 | 1.10E-02 | 2.60E-01 |
|  | <b>INTERPRO</b>         | <b>Neurotransmitter-gated ion-channel, conserved site</b>      | RT |  | 4  | 6.3  | 1.30E-02 | 6.00E-01 |
|  | <b>INTERPRO</b>         | <b>Neurotransmitter-gated ion-channel ligand-binding</b>       | RT |  | 4  | 6.3  | 1.30E-02 | 6.00E-01 |
|  | <b>INTERPRO</b>         | <b>Gamma-aminobutyric acid A receptor</b>                      | RT |  | 4  | 6.3  | 1.30E-02 | 6.00E-01 |
|  | <b>INTERPRO</b>         | <b>Neurotransmitter-gated ion-channel transmembrane domain</b> | RT |  | 4  | 6.3  | 1.30E-02 | 6.00E-01 |
|  | <b>INTERPRO</b>         | <b>Neurotransmitter-gated ion-channel</b>                      | RT |  | 4  | 6.3  | 1.30E-02 | 6.00E-01 |
|  | <b>UP_KEYWORDS</b>      | <b>Transit peptide</b>                                         | RT |  | 11 | 17.5 | 1.30E-02 | 1.30E-01 |
|  | <b>UP_SEQ_FEATURE</b>   | <b>transit peptide:Mitochondrion</b>                           | RT |  | 11 | 17.5 | 1.30E-02 | 5.90E-01 |
|  | <b>UP_KEYWORDS</b>      | <b>Chloride channel</b>                                        | RT |  | 4  | 6.3  | 1.30E-02 | 1.30E-01 |
|  | <b>UP_KEYWORDS</b>      | <b>Chloride</b>                                                | RT |  | 4  | 6.3  | 1.30E-02 | 1.30E-01 |
|  | <b>GOTERM_CC_DIRECT</b> | <b>chloride channel complex</b>                                | RT |  | 4  | 6.3  | 1.30E-02 | 2.70E-01 |
|  | <b>GOTERM_CC_DIRECT</b> | <b>GABA-A receptor complex</b>                                 | RT |  | 4  | 6.3  | 1.30E-02 | 2.70E-01 |
|  | <b>UP_KEYWORDS</b>      | <b>Flavoprotein</b>                                            | RT |  | 5  | 7.9  | 1.30E-02 | 1.20E-01 |
|  | <b>GOTERM_MF_DIRECT</b> | <b>GABA-A receptor activity</b>                                | RT |  | 4  | 6.3  | 1.30E-02 | 7.10E-01 |
|  | <b>GOTERM_MF_DIRECT</b> | <b>extracellular ligand-gated ion channel activity</b>         | RT |  | 4  | 6.3  | 1.30E-02 | 7.10E-01 |
|  | <b>GOTERM_BP_DIRECT</b> | <b>mitochondrial fission</b>                                   | RT |  | 4  | 6.3  | 1.30E-02 | 8.70E-01 |
|  | <b>GOTERM_BP_DIRECT</b> | <b>adenine transport</b>                                       | RT |  | 4  | 6.3  | 1.30E-02 | 8.70E-01 |
|  | <b>GOTERM_BP_DIRECT</b> | <b>cellular response to histamine</b>                          | RT |  | 4  | 6.3  | 1.30E-02 | 8.70E-01 |
|  | <b>GOTERM_BP_DIRECT</b> | <b>transmembrane transport</b>                                 | RT |  | 6  | 9.5  | 1.80E-02 | 8.90E-01 |
|  | <b>UP_KEYWORDS</b>      | <b>Epilepsy</b>                                                | RT |  | 7  | 11.1 | 2.60E-02 | 2.10E-01 |
|  | <b>BIOCARTA</b>         | <b>Electron Transport Reaction in Mitochondria</b>             | RT |  | 4  | 6.3  | 2.70E-02 | 7.70E-01 |
|  | <b>KEGG_PATHWAY</b>     | <b>HTLV-I infection</b>                                        | RT |  | 6  | 9.5  | 2.70E-02 | 4.50E-01 |

|                |                         |                                                     |    |       |       |      |          |           |
|----------------|-------------------------|-----------------------------------------------------|----|-------|-------|------|----------|-----------|
|                | <b>GOTERM_BP_DIRECT</b> | <b>signal transduction</b>                          | RT |       | 14    | 22.2 | 2.80E-02 | 9.50E-01  |
|                | <b>KEGG_PATHWAY</b>     | <b>Retrograde endocannabinoid signaling</b>         | RT |       | 8     | 12.7 | 3.30E-02 | 4.60E-01  |
|                | <b>UP_SEQ_FEATURE</b>   | <b>signal peptide</b>                               | RT |       | 12    | 19   | 3.80E-02 | 8.80E-01  |
|                | <b>KEGG_PATHWAY</b>     | <b>Alzheimer's disease</b>                          | RT |       | 8     | 12.7 | 4.20E-02 | 5.00E-01  |
| Red            |                         |                                                     |    |       |       |      |          |           |
| <b>Sublist</b> | <b>Category</b>         | <b>Term</b>                                         | RT | Genes | Count | %    | P-Value  | Benjamini |
|                | <b>GOTERM_BP_DIRECT</b> | <b>protein phosphorylation</b>                      | RT |       | 7     | 24.1 | 2.00E-03 | 5.20E-01  |
|                | <b>GOTERM_MF_DIRECT</b> | <b>calmodulin-dependent protein kinase activity</b> | RT |       | 4     | 13.8 | 3.00E-03 | 2.90E-01  |
|                | <b>UP_SEQ_FEATURE</b>   | <b>binding site:ATP</b>                             | RT |       | 7     | 24.1 | 6.20E-03 | 5.50E-01  |
|                | <b>GOTERM_BP_DIRECT</b> | <b>peptidyl-serine phosphorylation</b>              | RT |       | 5     | 17.2 | 7.00E-03 | 7.30E-01  |
|                | <b>UP_KEYWORDS</b>      | <b>Serine/threonine-protein kinase</b>              | RT |       | 6     | 20.7 | 7.10E-03 | 5.10E-01  |
|                | <b>UP_KEYWORDS</b>      | <b>Kinase</b>                                       | RT |       | 8     | 27.6 | 1.10E-02 | 4.30E-01  |
|                | <b>GOTERM_BP_DIRECT</b> | <b>protein autophosphorylation</b>                  | RT |       | 5     | 17.2 | 1.30E-02 | 8.00E-01  |
|                | <b>UP_KEYWORDS</b>      | <b>Membrane</b>                                     | RT |       | 23    | 79.3 | 1.30E-02 | 3.60E-01  |
|                | <b>UP_SEQ_FEATURE</b>   | <b>domain:Protein kinase</b>                        | RT |       | 6     | 20.7 | 1.40E-02 | 5.90E-01  |
|                | <b>UP_SEQ_FEATURE</b>   | <b>region of interest:Calmodulin-binding</b>        | RT |       | 4     | 13.8 | 1.40E-02 | 4.50E-01  |
|                | <b>UP_SEQ_FEATURE</b>   | <b>nucleotide phosphate-binding region:ATP</b>      | RT |       | 8     | 27.6 | 1.50E-02 | 3.90E-01  |
|                | <b>GOTERM_CC_DIRECT</b> | <b>plasma membrane</b>                              | RT |       | 20    | 69   | 1.80E-02 | 8.60E-01  |
|                | <b>UP_KEYWORDS</b>      | <b>Zinc-finger</b>                                  | RT |       | 4     | 13.8 | 2.00E-02 | 4.00E-01  |
|                | <b>GOTERM_MF_DIRECT</b> | <b>protein kinase activity</b>                      | RT |       | 5     | 17.2 | 2.10E-02 | 7.00E-01  |
|                | <b>GOTERM_BP_DIRECT</b> | <b>interferon-gamma-mediated signaling pathway</b>  | RT |       | 3     | 10.3 | 2.70E-02 | 9.20E-01  |
|                | <b>UP_KEYWORDS</b>      | <b>Cell membrane</b>                                | RT |       | 15    | 51.7 | 3.20E-02 | 4.70E-01  |
|                | <b>GOTERM_MF_DIRECT</b> | <b>protein serine/threonine kinase activity</b>     | RT |       | 5     | 17.2 | 3.20E-02 | 7.10E-01  |
|                | <b>UP_SEQ_FEATURE</b>   | <b>propeptide:Removed in mature form</b>            | RT |       | 4     | 13.8 | 3.60E-02 | 6.10E-01  |
|                | <b>UP_KEYWORDS</b>      | <b>GPI-anchor</b>                                   | RT |       | 3     | 10.3 | 4.20E-02 | 5.10E-01  |
|                | <b>UP_KEYWORDS</b>      | <b>Calmodulin-binding</b>                           | RT |       | 4     | 13.8 | 4.50E-02 | 4.80E-01  |
|                | <b>GOTERM_BP_DIRECT</b> | <b>intracellular signal transduction</b>            | RT |       | 5     | 17.2 | 4.60E-02 | 9.70E-01  |
| Magenta        |                         |                                                     |    |       |       |      |          |           |
| <b>Sublist</b> | <b>Category</b>         | <b>Term</b>                                         | RT | Genes | Count | %    | P-Value  | Benjamini |
|                | <b>UP_SEQ_FEATURE</b>   | <b>topological domain:Cytoplasmic</b>               | RT |       | 28    | 56   | 1.30E-11 | 2.70E-09  |



|  |                  |                                                           |    |  |    |    |          |          |
|--|------------------|-----------------------------------------------------------|----|--|----|----|----------|----------|
|  | UP_SEQ_FEATURE   | transmembrane region                                      | RT |  | 30 | 60 | 2.80E-10 | 2.80E-08 |
|  | UP_KEYWORDS      | Transmembrane helix                                       | RT |  | 30 | 60 | 5.70E-09 | 6.70E-07 |
|  | UP_KEYWORDS      | Transmembrane                                             | RT |  | 30 | 60 | 1.40E-08 | 8.30E-07 |
|  | GOTERM_CC_DIRECT | integral component of membrane                            | RT |  | 29 | 58 | 2.80E-08 | 4.50E-06 |
|  | UP_SEQ_FEATURE   | topological domain:Extracellular                          | RT |  | 20 | 40 | 7.30E-08 | 5.00E-06 |
|  | GOTERM_CC_DIRECT | plasma membrane                                           | RT |  | 41 | 82 | 1.30E-07 | 1.10E-05 |
|  | UP_SEQ_FEATURE   | glycosylation site:N-linked (GlcNAc...)                   | RT |  | 21 | 42 | 2.70E-07 | 1.40E-05 |
|  | UP_KEYWORDS      | Glycoprotein                                              | RT |  | 24 | 48 | 2.30E-06 | 9.00E-05 |
|  | UP_KEYWORDS      | Ion transport                                             | RT |  | 16 | 32 | 8.50E-06 | 2.50E-04 |
|  | UP_KEYWORDS      | Sodium                                                    | RT |  | 8  | 16 | 8.80E-06 | 2.10E-04 |
|  | GOTERM_BP_DIRECT | transferrin transport                                     | RT |  | 8  | 16 | 2.90E-05 | 1.30E-02 |
|  | UP_KEYWORDS      | Palmitate                                                 | RT |  | 12 | 24 | 4.10E-05 | 8.10E-04 |
|  | UP_KEYWORDS      | Sodium transport                                          | RT |  | 7  | 14 | 6.20E-05 | 1.00E-03 |
|  | GOTERM_BP_DIRECT | phagosome acidification                                   | RT |  | 7  | 14 | 6.60E-05 | 1.40E-02 |
|  | GOTERM_BP_DIRECT | ATP hydrolysis coupled proton transport                   | RT |  | 8  | 16 | 7.10E-05 | 1.00E-02 |
|  | UP_KEYWORDS      | Membrane                                                  | RT |  | 41 | 82 | 1.30E-04 | 1.90E-03 |
|  | UP_KEYWORDS      | Neurotransmitter transport                                | RT |  | 6  | 12 | 1.30E-04 | 1.70E-03 |
|  | GOTERM_BP_DIRECT | insulin receptor signaling pathway                        | RT |  | 7  | 14 | 1.80E-04 | 2.00E-02 |
|  | UP_KEYWORDS      | Transport                                                 | RT |  | 24 | 48 | 2.10E-04 | 2.40E-03 |
|  | GOTERM_BP_DIRECT | ion transmembrane transport                               | RT |  | 11 | 22 | 2.90E-04 | 2.50E-02 |
|  | UP_KEYWORDS      | Hydrogen ion transport                                    | RT |  | 7  | 14 | 3.80E-04 | 4.10E-03 |
|  | GOTERM_CC_DIRECT | lysosomal membrane                                        | RT |  | 10 | 20 | 4.80E-04 | 2.50E-02 |
|  | UP_KEYWORDS      | Cell adhesion                                             | RT |  | 10 | 20 | 7.00E-04 | 6.80E-03 |
|  | GOTERM_BP_DIRECT | glutamate secretion                                       | RT |  | 7  | 14 | 8.10E-04 | 5.80E-02 |
|  | UP_SEQ_FEATURE   | lipid moiety-binding region:S-palmitoyl cysteine          | RT |  | 9  | 18 | 8.20E-04 | 3.30E-02 |
|  | GOTERM_CC_DIRECT | apical plasma membrane                                    | RT |  | 9  | 18 | 8.30E-04 | 3.30E-02 |
|  | GOTERM_MF_DIRECT | proton-transporting ATPase activity, rotational mechanism | RT |  | 6  | 12 | 8.50E-04 | 1.10E-01 |
|  | GOTERM_CC_DIRECT | synaptic vesicle membrane                                 | RT |  | 7  | 14 | 1.40E-03 | 4.40E-02 |
|  | UP_KEYWORDS      | Cytoplasmic vesicle                                       | RT |  | 10 | 20 | 2.00E-03 | 1.80E-02 |
|  | UP_KEYWORDS      | Lipoprotein                                               | RT |  | 15 | 30 | 2.00E-03 | 1.70E-02 |
|  | UP_KEYWORDS      | Symport                                                   | RT |  | 6  | 12 | 2.00E-03 | 1.60E-02 |

|  |                         |                                                       |    |  |    |    |          |          |
|--|-------------------------|-------------------------------------------------------|----|--|----|----|----------|----------|
|  | <b>GOTERM_BP_DIRECT</b> | <b>regulation of macroautophagy</b>                   | RT |  | 7  | 14 | 2.50E-03 | 1.40E-01 |
|  | <b>UP_KEYWORDS</b>      | <b>Disulfide bond</b>                                 | RT |  | 14 | 28 | 3.60E-03 | 2.60E-02 |
|  | <b>GOTERM_BP_DIRECT</b> | <b>cell adhesion</b>                                  | RT |  | 8  | 16 | 4.80E-03 | 2.30E-01 |
|  | <b>UP_SEQ_FEATURE</b>   | <b>domain:Ig-like C2-type 5</b>                       | RT |  | 5  | 10 | 5.50E-03 | 1.70E-01 |
|  | <b>UP_SEQ_FEATURE</b>   | <b>domain:Ig-like C2-type 4</b>                       | RT |  | 5  | 10 | 5.50E-03 | 1.70E-01 |
|  | <b>GOTERM_MF_DIRECT</b> | <b>guanyl nucleotide binding</b>                      | RT |  | 4  | 8  | 5.90E-03 | 3.40E-01 |
|  | <b>UP_KEYWORDS</b>      | <b>Transducer</b>                                     | RT |  | 6  | 12 | 6.20E-03 | 4.20E-02 |
|  | <b>UP_KEYWORDS</b>      | <b>Cell membrane</b>                                  | RT |  | 25 | 50 | 6.40E-03 | 4.10E-02 |
|  | <b>UP_SEQ_FEATURE</b>   | <b>topological domain:Vesicular</b>                   | RT |  | 4  | 8  | 6.50E-03 | 1.70E-01 |
|  | <b>GOTERM_BP_DIRECT</b> | <b>sodium ion transmembrane transport</b>             | RT |  | 4  | 8  | 6.70E-03 | 2.80E-01 |
|  | <b>GOTERM_CC_DIRECT</b> | <b>integral component of plasma membrane</b>          | RT |  | 11 | 22 | 7.10E-03 | 1.70E-01 |
|  | <b>UP_SEQ_FEATURE</b>   | <b>domain:Fibronectin type-III 1</b>                  | RT |  | 5  | 10 | 1.00E-02 | 2.30E-01 |
|  | <b>UP_SEQ_FEATURE</b>   | <b>domain:Fibronectin type-III 2</b>                  | RT |  | 5  | 10 | 1.00E-02 | 2.30E-01 |
|  | <b>GOTERM_CC_DIRECT</b> | <b>voltage-gated potassium channel complex</b>        | RT |  | 5  | 10 | 1.00E-02 | 2.10E-01 |
|  | <b>GOTERM_BP_DIRECT</b> | <b>proton transport</b>                               | RT |  | 5  | 10 | 1.00E-02 | 3.70E-01 |
|  | <b>GOTERM_BP_DIRECT</b> | <b>regulation of cardiac conduction</b>               | RT |  | 5  | 10 | 1.00E-02 | 3.70E-01 |
|  | <b>GOTERM_BP_DIRECT</b> | <b>ion transport</b>                                  | RT |  | 5  | 10 | 1.00E-02 | 3.70E-01 |
|  | <b>GOTERM_CC_DIRECT</b> | <b>cell surface</b>                                   | RT |  | 9  | 18 | 1.40E-02 | 2.40E-01 |
|  | <b>GOTERM_CC_DIRECT</b> | <b>extracellular vesicle</b>                          | RT |  | 6  | 12 | 1.40E-02 | 2.20E-01 |
|  | <b>GOTERM_BP_DIRECT</b> | <b>cellular sodium ion homeostasis</b>                | RT |  | 4  | 8  | 1.50E-02 | 4.60E-01 |
|  | <b>UP_SEQ_FEATURE</b>   | <b>disulfide bond</b>                                 | RT |  | 10 | 20 | 1.80E-02 | 3.40E-01 |
|  | <b>GOTERM_MF_DIRECT</b> | <b>L-glutamate transmembrane transporter activity</b> | RT |  | 4  | 8  | 2.50E-02 | 6.90E-01 |
|  | <b>GOTERM_MF_DIRECT</b> | <b>calcium-dependent protein binding</b>              | RT |  | 4  | 8  | 2.50E-02 | 6.90E-01 |
|  | <b>GOTERM_MF_DIRECT</b> | <b>G-protein beta/gamma-subunit complex binding</b>   | RT |  | 4  | 8  | 2.50E-02 | 6.90E-01 |
|  | <b>GOTERM_MF_DIRECT</b> | <b>calcium-dependent phospholipid binding</b>         | RT |  | 4  | 8  | 2.50E-02 | 6.90E-01 |
|  | <b>UP_SEQ_FEATURE</b>   | <b>domain:Ig-like C2-type 3</b>                       | RT |  | 5  | 10 | 2.50E-02 | 4.00E-01 |
|  | <b>GOTERM_CC_DIRECT</b> | <b>synaptic vesicle</b>                               | RT |  | 7  | 14 | 2.70E-02 | 3.50E-01 |
|  | <b>UP_KEYWORDS</b>      | <b>Potassium transport</b>                            | RT |  | 4  | 8  | 2.70E-02 | 1.60E-01 |
|  | <b>GOTERM_CC_DIRECT</b> | <b>SNARE complex</b>                                  | RT |  | 4  | 8  | 2.70E-02 | 3.30E-01 |
|  | <b>GOTERM_BP_DIRECT</b> | <b>L-glutamate transmembrane transport</b>            | RT |  | 4  | 8  | 2.80E-02 | 6.50E-01 |

|  |                  |                                                                          |    |  |   |    |          |          |
|--|------------------|--------------------------------------------------------------------------|----|--|---|----|----------|----------|
|  | GOTERM_BP_DIRECT | cell communication by electrical coupling involved in cardiac conduction | RT |  | 4 | 8  | 2.80E-02 | 6.50E-01 |
|  | GOTERM_BP_DIRECT | cardiac muscle contraction                                               | RT |  | 4 | 8  | 2.80E-02 | 6.50E-01 |
|  | GOTERM_BP_DIRECT | response to drug                                                         | RT |  | 8 | 16 | 3.10E-02 | 6.60E-01 |
|  | UP_SEQ_FEATURE   | domain:Ig-like C2-type 2                                                 | RT |  | 5 | 10 | 3.50E-02 | 4.90E-01 |
|  | UP_SEQ_FEATURE   | domain:Ig-like C2-type 1                                                 | RT |  | 5 | 10 | 3.50E-02 | 4.90E-01 |
|  | GOTERM_MF_DIRECT | hydrogen ion transmembrane transporter activity                          | RT |  | 3 | 6  | 3.90E-02 | 7.50E-01 |
|  | GOTERM_MF_DIRECT | SNAP receptor activity                                                   | RT |  | 3 | 6  | 3.90E-02 | 7.50E-01 |
|  | GOTERM_CC_DIRECT | proton-transporting two-sector ATPase complex                            | RT |  | 3 | 6  | 4.20E-02 | 4.30E-01 |
|  | GOTERM_CC_DIRECT | proton-transporting V-type ATPase, V1 domain                             | RT |  | 3 | 6  | 4.20E-02 | 4.30E-01 |
|  | GOTERM_BP_DIRECT | vesicle docking                                                          | RT |  | 3 | 6  | 4.20E-02 | 7.40E-01 |
|  | GOTERM_BP_DIRECT | synaptic vesicle fusion to presynaptic active zone membrane              | RT |  | 3 | 6  | 4.20E-02 | 7.40E-01 |
|  | GOTERM_BP_DIRECT | neural retina development                                                | RT |  | 3 | 6  | 4.20E-02 | 7.40E-01 |
|  | GOTERM_BP_DIRECT | L-glutamate import                                                       | RT |  | 3 | 6  | 4.20E-02 | 7.40E-01 |
|  | UP_KEYWORDS      | Potassium                                                                | RT |  | 4 | 8  | 4.40E-02 | 2.30E-01 |
|  | GOTERM_CC_DIRECT | heterotrimeric G-protein complex                                         | RT |  | 4 | 8  | 4.40E-02 | 4.20E-01 |
|  | GOTERM_BP_DIRECT | axon guidance                                                            | RT |  | 6 | 12 | 4.80E-02 | 7.60E-01 |
|  | UP_KEYWORDS      | ADP-ribosylation                                                         | RT |  | 5 | 10 | 4.80E-02 | 2.40E-01 |

**eTable 11. Module Eigenprotein Differences**

| Module            | Green    | Orange   | Turquoise | Magenta  | Red      | Blue     |
|-------------------|----------|----------|-----------|----------|----------|----------|
| Control Avg       | -0.01576 | -0.01281 | 0.03716   | 0.01185  | 0.026518 | 0.038595 |
| Sz Avg            | 0.015764 | 0.012813 | -0.03716  | -0.01185 | -0.02652 | -0.0386  |
| Sz-Control        | 0.031529 | 0.025626 | -0.07432  | -0.0237  | -0.05304 | -0.07719 |
| ttest p: unpaired | 0.132946 | 0.222935 | 2.66E-04  | 0.270194 | 0.012367 | 2.03E-04 |
| ttest p: paired   | 0.09034  | 0.116511 | 6.99E-05  | 0.091867 | 0.014754 | 2.71E-05 |

**eTable 12. Aligned Sz-Control Homogenate Proteome and Transcriptome Findings**

| Uniprot ID | Protein Sz-control Limma.adj.P.Val | Protein Sz-control Log2FC | mRNA Sz-control adjusted p-value | mRNA Sz-control Log2FC |
|------------|------------------------------------|---------------------------|----------------------------------|------------------------|
| SYT2       | 0.005375149                        | -0.122835086              | 0.003243833                      | -0.176234004           |
| TBA1A      | 0.008579305                        | -0.066089099              | 0.00000565                       | -0.100329654           |
| FSCN1      | 0.03615796                         | -0.074857504              | 0.00000136                       | -0.074529382           |
| NFH        | 0.015175952                        | -0.254844357              | 0.035961461                      | -0.073692949           |
| AT1B1      | 0.001117375                        | -0.102448411              | 0.001399362                      | -0.043887543           |
| RP3A       | 0.036369988                        | -0.113331731              | 0.031400312                      | -0.043300882           |
| ODPB       | 0.008579305                        | -0.086446051              | 0.000455047                      | -0.038358436           |
| PTPRS      | 0.004676851                        | -0.096945857              | 0.001408589                      | -0.030526223           |
| VATA       | 0.003160468                        | -0.065457458              | 0.02937048                       | -0.023708676           |
| ACON       | 0.021093594                        | -0.123552434              | 0.015949714                      | 0.023471095            |
| AT1A1      | 0.021093594                        | -0.085582437              | 0.01712302                       | 0.042296928            |
| 4F2        | 0.010835763                        | -0.096461866              | 0.001893313                      | 0.056438921            |
| GLNA       | 0.028906267                        | -0.227023503              | 0.044515202                      | 0.064279469            |
| AKA12      | 0.023585932                        | -0.128840484              | 0.00000669                       | 0.06929371             |
| AT1A2      | 0.018501637                        | -0.078042524              | 0.001375596                      | 0.10073743             |
| PDE2A      | 0.023585932                        | 0.153193306               | 0.035506703                      | -0.025258188           |
| GNAO       | 0.039868642                        | 0.078890578               | 0.049180271                      | -0.024825585           |
| IMB1       | 0.004676851                        | 0.094872565               | 0.0108612                        | 0.019390345            |
| HS90B      | 0.037449888                        | 0.092109251               | 0.000556546                      | 0.046417811            |
| MK03       | 0.00374988                         | 0.154926195               | 0.00034939                       | 0.052308313            |
| NCPR       | 0.012292691                        | 0.187661774               | 0.000000236                      | 0.061283995            |
| CPNE6      | 0.043614178                        | 0.121786851               | 0.000554914                      | 0.061633193            |
| KAD4       | 2.19367E-05                        | 0.32599461                | 0.000028                         | 0.080344229            |
| GSTM3      | 0.001040375                        | 0.490479341               | 0.0000223                        | 0.11061781             |
| SNP25      | 0.001040375                        | -0.299291404              | 0.064588857                      | -0.034780934           |
| CISY       | 0.042406082                        | -0.075374426              | 0.06725991                       | 0.020550848            |
| S4A4       | 0.009693562                        | -0.149874177              | 0.074869159                      | 0.070044215            |
| GCYB1      | 0.008579305                        | 0.095645972               | 0.079012797                      | 0.020143352            |
| NCDN       | 0.005134706                        | 0.088245015               | 0.082921642                      | 0.026331726            |
| SLC25A5    | 0.004362404                        | -0.186984464              | 0.096788613                      | -0.024736436           |
| 1433E      | 0.003394264                        | 0.05300149                | 0.149904751                      | 0.017639491            |
| GNAQ       | 0.00525564                         | 0.112556251               | 0.167191797                      | -0.009683372           |
| NCAM2      | 0.008579305                        | 0.232794554               | 0.193404313                      | 0.013383947            |
| ROA2       | 0.008579305                        | 0.116287935               | 0.228028157                      | 0.016468302            |
| DLG2       | 0.039868642                        | 0.082335975               | 0.271835724                      | -0.011920906           |
| TAU        | 0.047705471                        | -0.209745357              | 0.319163153                      | -0.019210049           |
| MK01       | 0.001892006                        | 0.171465707               | 0.322057181                      | 0.007961644            |
| VATB2      | 0.043614178                        | -0.051179088              | 0.356802016                      | 0.011867597            |
| MPCP       | 0.001040375                        | -0.116208078              | 0.360782096                      | -0.008039597           |
| DLGP1      | 0.012292691                        | -0.221170908              | 0.395393179                      | -0.011101819           |
| AT1A3      | 0.01311673                         | -0.09881715               | 0.418677211                      | 0.01374708             |
| DLGP4      | 0.00706216                         | -0.146285653              | 0.449899384                      | -0.010448311           |
| GBB1       | 0.008579305                        | 0.081669369               | 0.459314576                      | -0.005793046           |
| ADT1       | 0.000777146                        | -0.125758836              | 0.475886376                      | 0.007596307            |
| VDAC1      | 0.033911339                        | -0.054094068              | 0.511525394                      | -0.006086601           |
| GLSK       | 0.001040375                        | -0.129959879              | 0.530344294                      | -0.007979929           |
| MARE2      | 0.040788107                        | 0.056956407               | 0.549448793                      | 0.007333039            |
| NNTM       | 0.048466609                        | -0.119024488              | 0.55971979                       | -0.004561984           |
| PRDX2      | 0.003377026                        | -0.137604852              | 0.572373263                      | -0.006775014           |
| DCE1       | 0.010835763                        | -0.220070654              | 0.577618111                      | -0.012775165           |
| VATC1      | 0.044080692                        | -0.054399193              | 0.6072197                        | -0.005263703           |
| ATPA       | 0.012716492                        | -0.091514964              | 0.608985151                      | -0.005144584           |
| DLGP2      | 0.008579305                        | 0.117750019               | 0.798038611                      | -0.00348257            |
| ADT3       | 0.000777146                        | -0.152242784              | 0.840028928                      | 0.002093473            |
| QCR2       | 0.021093594                        | -0.10825949               | 0.873187258                      | 0.001479466            |
| NDUAA      | 0.051029326                        | -0.152230496              | 0.201120092                      | -0.012057586           |
| PTPRZ      | 0.057086138                        | 0.139364062               | 0.138123225                      | 0.038150761            |
| M2OM       | 0.058181682                        | -0.06880053               | 0.953260667                      | -0.000543916           |
| NDUV1      | 0.061829864                        | -0.112474993              | 0.097432375                      | 0.017490552            |
| AATM       | 0.062518465                        | -0.069493275              | 0.161316712                      | 0.015299573            |
| FLOT1      | 0.064029604                        | 0.291321182               | 0.003763906                      | 0.026945971            |
| NFL        | 0.067304153                        | -0.153787298              | 0.949775379                      | -0.00107472            |
| EF1A1      | 0.067340291                        | 0.05075453                | 0.06961146                       | 0.021948037            |
| AINX       | 0.067340291                        | -0.138017057              | 0.678049594                      | 0.007803288            |
| GEPH       | 0.067340291                        | 0.082506394               | 0.877146778                      | 0.001360376            |
| NCAM1      | 0.069337359                        | 0.075748416               | 0.173236213                      | 0.01625614             |
| PSD11      | 0.072479405                        | 0.066133164               | 0.197818855                      | -0.012944316           |
| TFR1       | 0.074794176                        | 0.254402791               | 0.009275376                      | -0.06457984            |
| GDS1       | 0.074794176                        | 0.062764006               | 0.024640431                      | -0.024690914           |

|       |             |              |             |              |
|-------|-------------|--------------|-------------|--------------|
| SYT1  | 0.07941691  | -0.072720654 | 0.32688385  | -0.015409457 |
| NTRI  | 0.079852703 | 0.065781288  | 0.121663293 | 0.016297887  |
| CMC1  | 0.079852703 | -0.100679411 | 0.303019731 | -0.015393808 |
| NEGR1 | 0.082552776 | 0.080377627  | 0.170366055 | 0.017904469  |
| HSP7C | 0.083441489 | -0.034620518 | 0.131298743 | -0.024610649 |
| VAT1L | 0.100289861 | 0.180310228  | 0.00000261  | 0.099814455  |
| IQEC1 | 0.100463806 | 0.137549896  | 0.000154147 | -0.046474009 |
| HOME2 | 0.100463806 | 0.116726341  | 0.15306493  | -0.016659276 |
| OPA1  | 0.100463806 | -0.077874685 | 0.944398996 | 0.000518948  |
| KAD1  | 0.107020279 | 0.083441253  | 0.996841448 | 0.0000407    |
| PYGB  | 0.10832364  | 0.084089113  | 0.002054707 | 0.048280344  |
| DLG3  | 0.109615706 | 0.160062878  | 0.020771409 | 0.027122258  |
| MTOR  | 0.112767177 | 0.161746725  | 0.128482877 | -0.013198898 |
| DYN2  | 0.11294465  | 0.040510889  | 0.975224689 | -0.000444032 |
| EGFR  | 0.116908511 | -0.039521017 | 0.037646952 | 0.067304167  |
| HS12A | 0.119000462 | -0.053235153 | 0.011832613 | -0.030139802 |
| STIP1 | 0.119000462 | 0.046459845  | 0.00524313  | 0.057684345  |
| GNAS  | 0.120668324 | 0.08624004   | 0.42086518  | 0.009131773  |
| ATPB  | 0.120668324 | -0.070326574 | 0.735537317 | 0.004359331  |
| BAIP2 | 0.120999404 | 0.106782617  | 0.759969049 | 0.004861831  |
| CALB1 | 0.122257489 | 0.094531663  | 2.58E-11    | 0.180646252  |
| KCC2D | 0.123030912 | 0.096513912  | 0.764818636 | 0.003910377  |
| ADHX  | 0.128100494 | 0.083082943  | 0.0002444   | 0.035754833  |
| MDHM  | 0.130280028 | -0.055836579 | 0.070188288 | 0.016887282  |
| NOS1  | 0.130938884 | -0.139773567 | 0.136372258 | -0.03211862  |
| TEBP  | 0.130938884 | 0.073480727  | 0.168845004 | 0.02386429   |
| VPP1  | 0.141203206 | -0.056898086 | 0.573678388 | -0.005408781 |
| VGLU1 | 0.143045736 | 0.099049671  | 0.806929566 | 0.004622163  |
| SV2A  | 0.144568489 | -0.047675887 | 0.092617288 | -0.020744731 |
| EAA1  | 0.145187472 | -0.088450373 | 0.002143012 | 0.12863352   |
| UBE2N | 0.15112778  | -0.054053316 | 0.001511507 | -0.024965021 |
| SYNJ1 | 0.156940559 | -0.049738472 | 0.474190082 | -0.010031807 |
| 1433G | 0.162133637 | 0.026422898  | 0.6877768   | -0.004930084 |
| PP2BA | 0.167020664 | 0.052411596  | 0.359491181 | 0.011201346  |
| BSN   | 0.167966756 | 0.059646184  | 0.007916545 | -0.045616205 |
| NCHL1 | 0.167966756 | -0.127667729 | 0.710203855 | -0.00366299  |
| CDK5  | 0.17435611  | -0.083659344 | 0.190384809 | -0.016525533 |
| AP2A1 | 0.17435611  | -0.066589    | 0.535383099 | 0.006210552  |
| LDHA  | 0.180920606 | -0.047789666 | 0.001124339 | 0.053602959  |
| CH60  | 0.180920606 | -0.052118477 | 0.054748726 | 0.042956835  |
| IDH3A | 0.180920606 | -0.069802349 | 0.095842452 | -0.016485527 |
| PRDX5 | 0.194050572 | -0.056719106 | 0.919379288 | 0.001034729  |
| CALR  | 0.195154936 | 0.069201882  | 0.014140988 | 0.041082388  |
| FLOT2 | 0.195154936 | 0.176366884  | 0.0000156   | 0.042904223  |
| CAP2  | 0.198652221 | -0.113740579 | 0.413296182 | 0.013283923  |
| DCTN1 | 0.199540098 | 0.101924125  | 0.306751958 | 0.010222894  |
| PPIA  | 0.200392139 | -0.033881447 | 0.110619999 | -0.01676279  |
| VATD  | 0.200392139 | -0.036119811 | 0.264422255 | 0.010868813  |
| VAPA  | 0.200392139 | 0.073699953  | 0.269764562 | -0.006988996 |
| AATC  | 0.200392139 | -0.051440537 | 0.744784471 | 0.00505864   |
| GPM6A | 0.20200582  | 0.06700483   | 0.04883541  | 0.022846092  |
| KAP3  | 0.20200582  | 0.069163273  | 0.008485682 | 0.031388346  |
| GRP75 | 0.203886631 | -0.089681676 | 0.254211256 | 0.01066502   |
| KCNA1 | 0.204457597 | -0.106651712 | 5.89E-09    | -0.129599336 |
| SEPT3 | 0.205524773 | 0.056137206  | 0.709634976 | 0.003854892  |
| EAA2  | 0.235384449 | -0.075563157 | 0.000482498 | 0.149062385  |
| MAP1B | 0.23752952  | -0.051637551 | 0.257571987 | -0.017219217 |
| AOFB  | 0.241278462 | 0.123102629  | 4.05E-15    | 0.148912654  |
| DGKA  | 0.24819588  | 0.055601725  | 0.049294551 | 0.032455931  |
| VATH  | 0.260861134 | -0.038791211 | 0.0000115   | 0.051685101  |
| AAK1  | 0.260861134 | -0.055218173 | 0.639774546 | -0.005317186 |
| CTNB1 | 0.263742019 | 0.081441925  | 0.036809418 | 0.017451135  |
| RHOA  | 0.263742019 | 0.037799615  | 0.47160937  | -0.006079267 |
| 1433T | 0.266637375 | 0.025974507  | 0.004259104 | -0.028474973 |
| C1TC  | 0.268803172 | -0.124368499 | 0.000340173 | 0.039203936  |
| ANK2  | 0.268803172 | 0.042237705  | 0.40123065  | -0.006798089 |
| ACTN4 | 0.270392738 | -0.076182053 | 0.014485299 | -0.027846417 |
| KPCA  | 0.270392738 | -0.134525234 | 0.398321341 | 0.009756423  |
| CYFP1 | 0.276733766 | 0.04641647   | 0.021382177 | -0.037555917 |
| HPCL1 | 0.281250054 | 0.074080297  | 2.48E-11    | 0.130783801  |
| UBA1  | 0.281250054 | 0.035766891  | 0.053233154 | 0.018528678  |
| SDHB  | 0.281649712 | -0.050790185 | 0.493182589 | 0.005451337  |



|       |             |              |             |              |
|-------|-------------|--------------|-------------|--------------|
| GUAD  | 0.281649712 | 0.089507511  | 0.663426126 | 0.006863088  |
| SYN2  | 0.299333828 | 0.076754341  | 0.949775379 | -0.00107472  |
| CNTN1 | 0.304016799 | 0.036218532  | 0.368155176 | 0.008884303  |
| DCE2  | 0.304016799 | -0.071718314 | 0.58004408  | -0.014328787 |
| SHAN3 | 0.305680897 | 0.13944219   | 0.179620509 | -0.023317874 |
| NAC1  | 0.322387557 | -0.070919136 | 0.593192977 | 0.00722628   |
| KCRB  | 0.337449882 | 0.025886651  | 0.067079324 | 0.024602852  |
| G3P   | 0.337449882 | -0.027220115 | 0.109307888 | 0.016892759  |
| HSP74 | 0.337449882 | 0.039465266  | 0.369040999 | 0.01329863   |
| CTNA1 | 0.35091298  | 0.085706113  | 0.000000077 | -0.089086066 |
| FARP1 | 0.359367107 | 0.086968241  | 7.61E-08    | 0.070865746  |
| VDAC3 | 0.359367107 | -0.02875931  | 0.941795926 | 0.000734851  |
| KCC2A | 0.373592675 | 0.078449421  | 0.614260963 | 0.008237282  |
| MARK2 | 0.379819813 | 0.089533492  | 0.00043287  | -0.031413021 |
| UBP5  | 0.379819813 | 0.035630631  | 0.322980658 | 0.009996206  |
| ALDR  | 0.383449556 | 0.055200477  | 0.38819182  | 0.008443591  |
| RTN4  | 0.395658641 | -0.028551834 | 0.0000328   | -0.044958536 |
| RAB3A | 0.395658641 | -0.027258779 | 0.638357311 | 0.009098677  |
| COR1A | 0.397005585 | 0.051131821  | 0.0000166   | -0.069234715 |
| GNAI1 | 0.397005585 | 0.030970513  | 0.011478471 | -0.037926446 |
| AP3B2 | 0.397005585 | 0.055707366  | 0.533075143 | 0.006389032  |
| 1433Z | 0.397005585 | 0.029094719  | 0.720634145 | -0.003936315 |
| CLAP2 | 0.410985199 | -0.05269356  | 4.65E-11    | -0.066473568 |
| GRM3  | 0.410985199 | -0.066593527 | 0.007977286 | -0.048759343 |
| ENOA  | 0.410985199 | 0.0321866    | 0.000000168 | 0.064799624  |
| RHOG  | 0.410985199 | 0.154233619  | 0.064472525 | -0.059696521 |
| AAKG2 | 0.410985199 | -0.053343744 | 0.091696004 | -0.019750282 |
| SEPT7 | 0.411393375 | -0.033606473 | 0.000000436 | -0.0502948   |
| HS71A | 0.411393375 | 0.027479432  | 0.002344454 | 0.209987722  |
| GRIA1 | 0.411393375 | 0.18112086   | 0.059861772 | 0.023857932  |
| NFM   | 0.411393375 | -0.079593457 | 0.750281366 | 0.008513584  |
| CKAP4 | 0.412317315 | -0.04583713  | 0.165540281 | 0.014580686  |
| CTRO  | 0.420728635 | 0.302479664  | 0.023546991 | 0.03529256   |
| CXA1  | 0.420970927 | -0.094912866 | 0.000225541 | 0.168622547  |
| PTPRA | 0.420970927 | 0.100600932  | 0.055440185 | 0.017497573  |
| ARPC3 | 0.421246469 | -0.038207319 | 0.001613182 | -0.030824673 |
| PIPNB | 0.421246469 | -0.029598272 | 0.092835774 | 0.024394604  |
| PRS4  | 0.425269359 | 0.092133061  | 0.278433008 | 0.010235499  |
| OTUB1 | 0.431873279 | 0.02988215   | 0.059527959 | 0.019956324  |
| HS90A | 0.4360134   | 0.047555064  | 0.009668743 | 0.059354419  |
| VISL1 | 0.4360134   | -0.029905719 | 0.795576742 | 0.004138771  |
| PP2AA | 0.436532823 | 0.038465471  | 0.886329404 | 0.001024449  |
| SC6A1 | 0.437690793 | -0.04039988  | 0.099275362 | -0.027339922 |
| TBB5  | 0.437690793 | -0.027110447 | 0.752566186 | 0.004992817  |
| CAP1  | 0.437690793 | 0.036890796  | 0.921840476 | -0.000796453 |
| 2AAA  | 0.438732122 | -0.018614205 | 0.004091239 | 0.026920625  |
| XPOT  | 0.452824163 | 0.039538665  | 0.015257576 | 0.020389157  |
| RAB10 | 0.452824163 | 0.078715729  | 0.070220718 | -0.015090625 |
| VDAC2 | 0.452824163 | -0.027053598 | 0.875280864 | -0.00124626  |
| COR1C | 0.461356415 | 0.03968652   | 0.053061317 | 0.020650317  |
| AT2B1 | 0.465821283 | 0.037985135  | 0.021469796 | -0.027074324 |
| VATE1 | 0.465821283 | 0.058036305  | 0.93592266  | -0.000983034 |
| FLNC  | 0.467677037 | 0.045725873  | 0.540304501 | 0.019558425  |
| MBP   | 0.46837977  | 0.109453074  | 0.110177556 | -0.066649482 |
| NMDE1 | 0.47633997  | -0.062608432 | 0.022841965 | -0.036196665 |
| RB39A | 0.479783497 | -0.031621995 | 0.256798136 | 0.034891995  |
| HXK1  | 0.485901014 | -0.022967465 | 0.010711022 | 0.028447939  |
| RAB2A | 0.494012125 | 0.018601334  | 0.098656317 | -0.01204287  |
| CNTN2 | 0.498171079 | -0.076468645 | 0.040556693 | -0.06870187  |
| NDUS4 | 0.498171079 | -0.090750327 | 0.013770907 | -0.029033791 |
| ALDOC | 0.498171079 | -0.025990232 | 0.024786106 | 0.043450576  |
| GBRA1 | 0.498171079 | 0.108674564  | 0.352593087 | -0.015008699 |
| 3HIDH | 0.498171079 | -0.050288006 | 0.986603732 | -0.000191855 |
| NBEA  | 0.505071049 | 0.050653355  | 0.130076701 | -0.014066274 |
| CBR1  | 0.505071049 | 0.050308321  | 0.510205982 | -0.014298809 |
| PRS7  | 0.505388113 | -0.025593323 | 0.734730571 | 0.003036596  |
| TBB2A | 0.506947657 | -0.032539478 | 0.365797216 | -0.015372467 |
| CACB3 | 0.50870486  | -0.072829499 | 0.018549304 | -0.030395422 |
| ZNT1  | 0.50870486  | -0.080805122 | 0.018398599 | 0.040924646  |
| ALDH2 | 0.50870486  | -0.057619764 | 0.0000921   | 0.07064921   |
| GSH1  | 0.50870486  | 0.0589767    | 0.499033148 | 0.009145906  |
| GDAP1 | 0.508813197 | -0.063846975 | 0.108694397 | 0.015842114  |

|       |             |              |             |              |
|-------|-------------|--------------|-------------|--------------|
| GRIA3 | 0.508813197 | 0.08620625   | 0.91573703  | -0.001271639 |
| NTRK2 | 0.520597501 | -0.03663587  | 0.0000015   | 0.118846108  |
| GBRB1 | 0.528578127 | 0.035079255  | 0.296593535 | 0.021591569  |
| VAPB  | 0.535137475 | 0.063941407  | 0.454454714 | -0.008248337 |
| PP1A  | 0.539319645 | -0.015033322 | 0.00000708  | -0.041384002 |
| SEPT2 | 0.539319645 | -0.034548826 | 0.544582166 | 0.009735875  |
| NCAN  | 0.542362209 | 0.122986478  | 0.594532127 | -0.013576749 |
| SNAB  | 0.550314191 | -0.040170477 | 0.059071965 | 0.029697129  |
| PSA1  | 0.551847278 | -0.051787338 | 0.440164589 | -0.006538465 |
| ANK1  | 0.552987683 | 0.026498566  | 0.0000308   | -0.087471055 |
| ATPO  | 0.552987683 | -0.015660882 | 0.019927556 | -0.025915591 |
| RBGPR | 0.552987683 | 0.065009258  | 0.095791269 | -0.012497666 |
| IF4H  | 0.552987683 | 0.062342739  | 0.109476654 | 0.013523425  |
| MDHC  | 0.552987683 | -0.017126846 | 0.293006314 | -0.014955028 |
| SYT7  | 0.553474356 | 0.053824749  | 0.140977689 | -0.020290437 |
| ARP3  | 0.569012832 | 0.02698255   | 0.064112083 | -0.014717572 |
| MAP1A | 0.572852884 | -0.029384581 | 0.011613226 | -0.033132503 |
| SYN1  | 0.572852884 | 0.031359957  | 0.005637315 | 0.050779583  |
| 2A5D  | 0.572852884 | 0.03149106   | 0.143888414 | 0.012472616  |
| NMDE2 | 0.572852884 | 0.052781032  | 0.304524258 | 0.01668108   |
| RAN   | 0.572852884 | 0.017969668  | 0.558962027 | 0.004790315  |
| AAKG1 | 0.588337489 | -0.020234496 | 0.491739037 | -0.007330266 |
| DIRA2 | 0.592197727 | 0.033095451  | 0.00000831  | -0.08035041  |
| CALM2 | 0.592197727 | -0.024382048 | 0.000381146 | -0.035434927 |
| AK1A1 | 0.592197727 | -0.065139536 | 0.009584717 | -0.029382116 |
| PRS6A | 0.592197727 | 0.081487801  | 0.031434692 | -0.021244499 |
| PSMD2 | 0.59426314  | -0.052386367 | 0.556843945 | -0.005103845 |
| RAC1  | 0.596659856 | 0.015940575  | 0.619318035 | 0.007100492  |
| ENOG  | 0.606901003 | -0.015338539 | 0.02577952  | 0.034048502  |
| SEPT4 | 0.606901003 | -0.021558614 | 0.067442553 | -0.051333823 |
| NRXN1 | 0.625977105 | -0.035609644 | 0.017605625 | 0.022406372  |
| MARK1 | 0.628349397 | 0.034269237  | 0.024643179 | -0.020288759 |
| FAK2  | 0.628349397 | -0.049031403 | 0.00000275  | 0.100255389  |
| IP3KA | 0.628349397 | 0.068166798  | 0.132403379 | 0.033076248  |
| SH3G2 | 0.63412559  | 0.020794919  | 0.255593674 | 0.019710848  |
| DMXL2 | 0.63921445  | -0.038296616 | 0.000558014 | -0.037087711 |
| HPCA  | 0.63921445  | -0.032118806 | 0.183535007 | 0.020284613  |
| 2ABA  | 0.63921445  | 0.04292845   | 0.840325633 | 0.001963726  |
| CAD10 | 0.641481405 | 0.030159827  | 0.070778392 | 0.022920883  |
| CSK1  | 0.64640192  | 0.041503044  | 0.000614658 | -0.048596234 |
| ANXA3 | 0.64640192  | -0.065166054 | 0.015027668 | 0.083013657  |
| BDH   | 0.648389754 | -0.037500605 | 0.261041809 | -0.014578572 |
| RTN1  | 0.648389754 | 0.020498299  | 0.313333683 | 0.013295244  |
| PAK1  | 0.648389754 | -0.079190867 | 0.346879244 | 0.014915479  |
| KALRN | 0.648389754 | -0.034219125 | 0.468527322 | 0.007809367  |
| SNA   | 0.648389754 | -0.019174148 | 0.490204237 | -0.008374815 |
| RTN3  | 0.648389754 | 0.020498299  | 0.948554175 | -0.000750787 |
| CLH1  | 0.654877764 | -0.009859603 | 0.053610916 | -0.017355826 |
| VPS35 | 0.654877764 | 0.032455398  | 0.381502211 | -0.007450822 |
| CPT1A | 0.655703302 | -0.034923607 | 0.800410031 | -0.005414845 |
| COPG1 | 0.661325385 | -0.02130548  | 0.141526291 | 0.017605684  |
| CAPS1 | 0.661488443 | 0.047214583  | 0.960032331 | -0.000655367 |
| G6PI  | 0.661890264 | 0.026755874  | 0.0000946   | 0.03865883   |
| RAB1A | 0.661890264 | -0.016492503 | 0.712206869 | 0.002778769  |
| VIME  | 0.664801551 | 0.069222805  | 0.0000803   | 0.13061714   |
| RABE1 | 0.685256616 | 0.034016932  | 0.599292946 | -0.003864489 |
| GLPK  | 0.686768397 | 0.029410293  | 0.00363647  | 0.038565011  |
| PP1B  | 0.686768397 | -0.020124539 | 0.383670776 | 0.006660457  |
| CAND1 | 0.690368388 | 0.019930324  | 0.002259409 | -0.019515187 |
| PAK3  | 0.690368388 | 0.032235353  | 0.017444485 | 0.027300899  |
| PRS8  | 0.690368388 | 0.031901402  | 0.014715739 | 0.028695611  |
| SAR1B | 0.690368388 | 0.030696624  | 0.253155905 | -0.01074845  |
| CNTP1 | 0.690368388 | -0.030539031 | 0.321912122 | -0.01397454  |
| ARPC2 | 0.690368388 | -0.020750209 | 0.44581866  | -0.006320447 |
| GRIA2 | 0.690368388 | -0.039549422 | 0.83979693  | 0.002205666  |
| KPYM  | 0.702299796 | -0.015878972 | 0.007803155 | 0.030352555  |
| CN37  | 0.705083275 | 0.045437022  | 0.001495152 | -0.107770787 |
| ABR   | 0.705083275 | -0.040579566 | 0.544057791 | -0.005083873 |
| DLG4  | 0.707278269 | 0.030230655  | 0.489580939 | 0.007129964  |
| UCHL1 | 0.707278269 | -0.023992622 | 0.637653385 | 0.006365621  |
| KPCE  | 0.707278269 | 0.024540267  | 0.700094526 | -0.004745747 |
| AP180 | 0.707278269 | -0.015146553 | 0.809436218 | 0.002915278  |



|       |             |              |             |              |
|-------|-------------|--------------|-------------|--------------|
| C2C2L | 0.710934529 | 0.016801452  | 0.064890824 | -0.017468164 |
| SRCN1 | 0.720826843 | 0.025237857  | 2.15E-08    | -0.084709907 |
| ADDB  | 0.720826843 | 0.0189129    | 0.017613277 | 0.028568402  |
| SDHA  | 0.72409495  | -0.019252308 | 0.001621161 | 0.041339404  |
| E41L1 | 0.728646502 | -0.032290273 | 0.060552672 | -0.022285176 |
| GNA13 | 0.732153951 | 0.033731044  | 0.011520997 | 0.048697304  |
| STX1B | 0.732153951 | -0.015204754 | 0.336683862 | -0.016085349 |
| RHG01 | 0.732153951 | 0.026640209  | 0.920808661 | -0.001355826 |
| NRXN3 | 0.733931379 | -0.032654008 | 0.000667264 | -0.043625501 |
| ESYT2 | 0.733931379 | -0.066780916 | 0.010511176 | -0.026717881 |
| NEB1  | 0.733931379 | 0.038941132  | 0.80683007  | 0.002337819  |
| DCTN2 | 0.735714559 | -0.022092376 | 0.168739751 | -0.012616083 |
| PACN1 | 0.73582113  | 0.023062243  | 0.634106555 | -0.007019942 |
| ACOC  | 0.738949114 | 0.042747596  | 0.00000277  | 0.069072692  |
| DPYL1 | 0.738949114 | -0.010050545 | 0.239951704 | 0.013625331  |
| AP2A2 | 0.740602737 | 0.028595116  | 0.029247689 | 0.021206476  |
| RAB14 | 0.740998311 | 0.014179066  | 0.247122679 | -0.009243142 |
| VINC  | 0.743631835 | -0.075736861 | 0.003372249 | 0.046725954  |
| COF1  | 0.755313494 | -0.012239446 | 0.037653009 | -0.019279972 |
| FAS   | 0.755313494 | -0.023403894 | 0.059570646 | -0.025797127 |
| ATLA1 | 0.755501736 | -0.025812963 | 0.492584369 | -0.008509805 |
| AL3A1 | 0.75699048  | -0.018318984 | 0.701156953 | -0.022026578 |
| RAP1A | 0.75699048  | 0.02194147   | 0.867936248 | 0.001801755  |
| RHG35 | 0.757515178 | 0.040301272  | 0.202599222 | -0.0109465   |
| RUFY3 | 0.757515178 | -0.017567226 | 0.457928328 | -0.005978235 |
| SNPH  | 0.757515178 | -0.032811174 | 0.55999266  | 0.007563833  |
| STXB1 | 0.757515178 | 0.01331773   | 0.971703899 | -0.000573157 |
| DYHC1 | 0.762215544 | -0.013166245 | 0.886845755 | 0.00168659   |
| MTAP2 | 0.763016685 | -0.017780203 | 0.002714532 | -0.036741004 |
| IPO5  | 0.763016685 | -0.024718143 | 0.048652434 | 0.015531215  |
| KPCG  | 0.763016685 | -0.079333132 | 0.002563105 | 0.065629087  |
| EFHD2 | 0.770259308 | -0.017971768 | 0.003946841 | -0.050128195 |
| S12A5 | 0.780261111 | -0.017775412 | 0.888415252 | -0.001930532 |
| OGDHL | 0.787842708 | -0.031912604 | 0.01539471  | 0.033802658  |
| CO2   | 0.787842708 | 0.01657251   | 0.128668281 | 0.056658183  |
| ADDA  | 0.790345782 | -0.027659281 | 0.015235109 | 0.017493115  |
| NLGN2 | 0.790345782 | -0.029582878 | 0.025137024 | 0.026201348  |
| SUCB1 | 0.790345782 | -0.011282411 | 0.131076722 | -0.015330214 |
| GNAZ  | 0.790345782 | 0.018870305  | 0.167977725 | -0.014676209 |
| COPA  | 0.790345782 | 0.030925403  | 0.506746129 | 0.006544924  |
| GRP78 | 0.792329305 | -0.015236436 | 0.020607904 | 0.059022116  |
| PYC   | 0.79555935  | -0.026808959 | 0.000302327 | 0.05002694   |
| ARC1A | 0.79555935  | -0.011763317 | 0.689783276 | -0.003031741 |
| SEPT9 | 0.795976634 | -0.023004855 | 0.002884934 | 0.03547255   |
| DYN1  | 0.796519112 | 0.008942373  | 0.014331743 | 0.036834337  |
| VP26B | 0.805008188 | 0.021052039  | 0.102017265 | -0.01116826  |
| CPNS1 | 0.816484208 | -0.01917982  | 0.173815165 | 0.016667484  |
| CAPZB | 0.828819751 | 0.01174396   | 0.068046835 | -0.014199525 |
| SYGP1 | 0.828819751 | 0.025057269  | 0.574340129 | -0.007040209 |
| RGS7  | 0.840558961 | -0.013902205 | 0.138344884 | 0.019549226  |
| DCLK1 | 0.852248185 | -0.015026962 | 0.00757617  | -0.039501759 |
| RALA  | 0.858315411 | -0.007644537 | 0.01177336  | -0.025959686 |
| GRM5  | 0.858315411 | 0.009433848  | 0.024052531 | 0.043179193  |
| L1CAM | 0.864348287 | 0.009250144  | 0.025021401 | 0.03497399   |
| ITPR1 | 0.872571654 | 0.0183427    | 0.925291596 | 0.001596736  |
| MYPR  | 0.877561547 | 0.022963136  | 0.000590676 | -0.15752482  |
| DPYL2 | 0.877561547 | -0.006416631 | 0.007761829 | 0.028397758  |
| ARP2  | 0.877561547 | -0.009297817 | 0.083144312 | 0.021763832  |
| CUL3  | 0.877561547 | 0.011737994  | 0.211945471 | -0.008534859 |
| PHB2  | 0.877561547 | -0.011942359 | 0.305806588 | -0.009476486 |
| ACSL6 | 0.877739551 | -0.017280078 | 0.065384528 | -0.02892421  |
| GRM2  | 0.88541972  | 0.01897542   | 0.00225209  | -0.067125626 |
| HOME1 | 0.8936002   | -0.014272824 | 0.000000386 | -0.091400467 |
| SERA  | 0.8936002   | -0.014271861 | 0.187034263 | 0.031183331  |
| DAAM2 | 0.895761102 | 0.010847644  | 0.000162127 | -0.100593192 |
| CACB4 | 0.895761102 | 0.008438663  | 0.734959759 | -0.0042915   |
| ACLY  | 0.895761102 | -0.011776493 | 0.973937776 | -0.000386153 |
| GRM1  | 0.899156045 | 0.030663688  | 0.006232351 | 0.042831387  |
| PSD12 | 0.899156045 | -0.006815517 | 0.116590942 | 0.01777995   |
| NFASC | 0.899156045 | 0.007196091  | 0.186722795 | -0.020858553 |
| KAP2  | 0.899156045 | -0.010763117 | 0.300509536 | 0.008868471  |
| ACTZ  | 0.899156045 | 0.005741586  | 0.494797104 | -0.005568282 |



|        |             |              |             |              |
|--------|-------------|--------------|-------------|--------------|
| VGLU2  | 0.899156045 | -0.020816436 | 0.711794048 | 0.010987634  |
| PSMD7  | 0.911191493 | -0.009196458 | 0.807601894 | -0.002388239 |
| ODO1   | 0.911585965 | -0.011082546 | 0.065676474 | 0.01898528   |
| SEPT5  | 0.911585965 | 0.012260488  | 0.150602616 | 0.015822955  |
| GHC1   | 0.911585965 | -0.009732951 | 0.36639943  | -0.012339369 |
| AP1B1  | 0.911585965 | -0.00338481  | 0.5333042   | 0.005540087  |
| KCC2B  | 0.918169312 | -0.009308186 | 0.008140938 | -0.029983166 |
| SND1   | 0.918169312 | 0.010673782  | 9.65E-08    | 0.04900605   |
| SRC    | 0.922300203 | -0.007208343 | 0.024975616 | 0.024557313  |
| SEPT8  | 0.929079265 | 0.007324561  | 0.000475983 | -0.037451268 |
| DHE3   | 0.936768187 | -0.00642061  | 0.003463388 | 0.055377577  |
| SCOT1  | 0.948123677 | -0.003915734 | 0.00017216  | 0.038489359  |
| ACTG1  | 0.948123677 | -0.005686333 | 0.212316964 | 0.01618206   |
| GRIA4  | 0.949037905 | -0.009051369 | 0.378736488 | -0.01103167  |
| AP2B1  | 0.956743976 | -0.002674666 | 0.748523134 | 0.003332736  |
| CO3    | 0.957083446 | -0.008201901 | 0.004467864 | -0.174020018 |
| USO1   | 0.963536369 | 0.00787485   | 0.003433622 | -0.021019885 |
| SHLB2  | 0.963536369 | 0.003932022  | 0.086240503 | -0.019702493 |
| HECTD4 | 0.963536369 | -0.002863254 | 0.293266744 | -0.010224871 |
| GBRG2  | 0.964258279 | 0.006291371  | 0.492885207 | 0.011596635  |
| GPDM   | 0.965890676 | 0.003071384  | 0.002601374 | 0.040557411  |
| RHOB   | 0.965890676 | 0.002143555  | 0.31285588  | 0.01963059   |
| NMDZ1  | 0.96953599  | -0.00650398  | 0.007924241 | 0.039259486  |
| CDC42  | 0.978817013 | 0.001417068  | 1.69E-12    | -0.070432281 |
| GSK3B  | 0.978817013 | -0.008641997 | 0.012108686 | -0.022494587 |
| ARF1   | 0.978817013 | 0.000848363  | 0.000723674 | 0.031363192  |
| ALDOA  | 0.978817013 | 0.001234385  | 0.005027722 | 0.033538096  |
| EPN1   | 0.978817013 | 0.001618177  | 0.000585314 | 0.038435609  |
| GBRB3  | 0.978817013 | 0.004432725  | 0.001141696 | 0.038996205  |
| AP2M1  | 0.978817013 | -0.001141286 | 0.429465073 | -0.008194927 |
| ERC2   | 0.987192741 | 0.003890575  | 0.006892335 | -0.037091404 |
| SEP11  | 0.987192741 | -0.003383653 | 0.007725357 | -0.0229415   |
| CNDP2  | 0.987192741 | -0.002326185 | 0.166538705 | 0.019538328  |
| CKAP5  | 0.990114581 | 0.001232841  | 0.161620091 | 0.011359435  |
| SPTB1  | 0.990114581 | 0.000814863  | 0.179343808 | 0.017231671  |
| PSMD1  | 0.990114581 | 0.000995478  | 0.184171641 | -0.012529068 |
| NSF    | 0.990114581 | 0.0007134    | 0.52235599  | 0.009705549  |
| ANK3   | 0.990831764 | -0.001102983 | 0.000892405 | -0.043513813 |
| FARP2  | 0.990831764 | 0.001024913  | 0.014485759 | -0.028414065 |
| STX1A  | 0.990831764 | -0.000840894 | 0.058420254 | -0.030477403 |
| AIP    | 0.990831764 | 0.00065741   | 0.192255801 | 0.015957856  |
| AK1C1  | 0.990831764 | 0.001535501  | 0.640618108 | -0.011454821 |
| GDIA   | 0.997658933 | 5.34725E-05  | 0.070869515 | 0.019463879  |

Reports the aligned adjusted p-values and Sz-control fold-changes from the homogenate proteome experiment in the present study and adjusted p-values and Sz-control fold-changes from a meta-analysis of transcriptome studies in Sz tissue (Gandel et al. 2018).

**eTable 13. Aligned Sz-Control Syntaptosome Proteome and Transcriptome Findings**

| Uniprot ID | Protein Sz-control Limma.adj.P.Val | Protein Sz-control Log2FC | mRNA Sz-control adjusted p-value | mRNA Sz-control Log2FC |
|------------|------------------------------------|---------------------------|----------------------------------|------------------------|
| SYT2       | 0.01257323                         | -0.111143137              | 0.003243833                      | -0.176234004           |
| CO3        | 0.010545166                        | -0.11797503               | 0.004467864                      | -0.174020018           |
| HOME1      | 0.01257323                         | -0.209758548              | 0.000000386                      | -0.091400467           |
| SRCN1      | 0.002679008                        | -0.250625565              | 2.15E-08                         | -0.084709907           |
| GRM3       | 0.003901652                        | -0.185064985              | 0.007977286                      | -0.048759343           |
| AT1B1      | 0.002596188                        | -0.164153082              | 0.001399362                      | -0.043887543           |
| NRXN3      | 0.018346867                        | -0.127714287              | 0.000667264                      | -0.043625501           |
| PTPRS      | 0.01257323                         | -0.11091605               | 0.001408589                      | -0.030526223           |
| KCC2B      | 0.041637057                        | -0.21309464               | 0.008140938                      | -0.029983166           |
| AT2B1      | 0.003410692                        | -0.116028014              | 0.021469796                      | -0.027074324           |
| ATPO       | 0.003901652                        | -0.159747956              | 0.019927556                      | -0.025915591           |
| HXK1       | 0.003901652                        | -0.138862333              | 0.010711022                      | 0.028447939            |
| OGDHL      | 6.05725E-05                        | -0.252121219              | 0.01539471                       | 0.033802658            |
| GLPK       | 0.034979222                        | -0.144869816              | 0.00363647                       | 0.038565011            |
| NMDZ1      | 0.001703434                        | -0.221589326              | 0.007924241                      | 0.039259486            |
| VATH       | 0.004343146                        | -0.100111623              | 0.0000115                        | 0.051685101            |
| CPNE6      | 0.01257323                         | -0.118434019              | 0.000554914                      | 0.061633193            |
| KPCG       | 0.002596188                        | -0.275086029              | 0.002563105                      | 0.065629087            |
| TFR1       | 0.023340381                        | 0.092217809               | 0.009275376                      | -0.06457984            |
| PRS6A      | 0.009892557                        | 0.106190134               | 0.031434692                      | -0.021244499           |
| FLOT1      | 0.024272693                        | 0.141231676               | 0.003763906                      | 0.026945971            |
| ANK1       | 1.36973E-05                        | 0.209710068               | 0.0000308                        | -0.087471055           |
| C2C2L      | 0.002596188                        | -0.164721158              | 0.064890824                      | -0.017468164           |
| SEPT4      | 0.005145143                        | -0.084945879              | 0.067442553                      | -0.051333823           |

|         |             |              |             |              |
|---------|-------------|--------------|-------------|--------------|
| SV2A    | 0.034979222 | -0.085429892 | 0.092617288 | -0.020744731 |
| NDUV1   | 0.004970492 | -0.140532074 | 0.097432375 | 0.017490552  |
| NBEA    | 0.01520273  | -0.179801643 | 0.130076701 | -0.014066274 |
| IP3KA   | 0.003976239 | -0.242825779 | 0.132403379 | 0.033076248  |
| SEPT5   | 0.018382104 | -0.075449467 | 0.150602616 | 0.015822955  |
| CKAP4   | 0.003901652 | -0.166538032 | 0.165540281 | 0.014580686  |
| SPTB1   | 0.002679008 | 0.112730814  | 0.179343808 | 0.017231671  |
| NDUAA   | 0.006271872 | -0.131547475 | 0.201120092 | -0.012057586 |
| BDH     | 0.002158025 | -0.240693443 | 0.261041809 | -0.014578572 |
| GBRB1   | 0.003901652 | -0.166947077 | 0.296593535 | 0.021591569  |
| CMC1    | 0.002679008 | -0.146000212 | 0.303019731 | -0.015393808 |
| RTN1    | 0.034979222 | 0.081160582  | 0.313333683 | 0.013295244  |
| UBP5    | 0.01520273  | -0.164917217 | 0.322980658 | 0.009996206  |
| GBRA1   | 0.002158025 | -0.195814527 | 0.352593087 | -0.015008699 |
| MPCP    | 0.008464189 | -0.128374312 | 0.360782096 | -0.008039597 |
| GHC1    | 0.00153637  | -0.179106736 | 0.36639943  | -0.012339369 |
| ANK2    | 3.41183E-05 | 0.210017612  | 0.40123065  | -0.006798089 |
| AT1A3   | 0.000159759 | -0.157925552 | 0.418677211 | 0.01374708   |
| AP2M1   | 0.002158025 | 0.08938078   | 0.429465073 | -0.008194927 |
| ADT1    | 0.01520273  | -0.123858507 | 0.475886376 | 0.007596307  |
| DLG4    | 0.004438499 | -0.245642733 | 0.489580939 | 0.007129964  |
| GBRG2   | 0.005012197 | -0.160262592 | 0.492885207 | 0.011596635  |
| SDHB    | 0.002158025 | -0.159538098 | 0.493182589 | 0.005451337  |
| VDAC1   | 0.003281239 | -0.15857805  | 0.511525394 | -0.006086601 |
| NSF     | 0.042009249 | -0.107510152 | 0.52235599  | 0.009705549  |
| PRDX2   | 9.12721E-05 | -0.218298341 | 0.572373263 | -0.006775014 |
| NAC1    | 0.004970492 | -0.158443934 | 0.593192977 | 0.00722628   |
| ATPA    | 0.001245678 | -0.184807792 | 0.608985151 | -0.005144584 |
| AAK1    | 0.010545166 | -0.087259324 | 0.639774546 | -0.005317186 |
| KPCE    | 0.042943974 | -0.153950635 | 0.700094526 | -0.004745747 |
| VGLU2   | 0.049650062 | -0.194571547 | 0.711794048 | 0.010987634  |
| CACB4   | 3.38394E-06 | -0.195936828 | 0.734959759 | -0.0042915   |
| GRIA2   | 0.000432734 | -0.270257868 | 0.83979693  | 0.002205666  |
| ADT3    | 0.00011907  | -0.218044278 | 0.840028928 | 0.002093473  |
| QCR2    | 0.003976239 | -0.192121794 | 0.873187258 | 0.001479466  |
| S12A5   | 7.0257E-07  | -0.501697883 | 0.888415252 | -0.001930532 |
| GRIA3   | 0.028494305 | -0.181045072 | 0.91573703  | -0.001271639 |
| RHG01   | 9.08511E-08 | 0.38570088   | 0.920808661 | -0.001355826 |
| OPA1    | 0.011812219 | -0.127444615 | 0.944398996 | 0.000518948  |
| M2OM    | 0.018382104 | -0.108385431 | 0.953260667 | -0.000543916 |
| E41L1   | 0.050470599 | 0.144175836  | 0.060552672 | -0.022285176 |
| CDK5    | 0.050957234 | -0.141744752 | 0.190384809 | -0.016525533 |
| VDAC2   | 0.052453178 | -0.083808696 | 0.875280864 | -0.00124626  |
| VATA    | 0.056051572 | -0.0753321   | 0.02937048  | -0.023708676 |
| PHB2    | 0.057266736 | -0.085432742 | 0.305806588 | -0.009476486 |
| EAA1    | 0.057962959 | -0.081233656 | 0.002143012 | 0.12863352   |
| VATD    | 0.057962959 | -0.078951683 | 0.264422255 | 0.010868813  |
| KCC2D   | 0.057962959 | -0.210729521 | 0.764818636 | 0.003910377  |
| VATB2   | 0.059970903 | -0.085536454 | 0.356802016 | 0.011867597  |
| ATLA1   | 0.060875269 | 0.06837712   | 0.492584369 | -0.008509805 |
| SYT1    | 0.061051903 | -0.079248815 | 0.32688385  | -0.015409457 |
| CAP2    | 0.071343279 | 0.107200665  | 0.413296182 | 0.013283923  |
| S4A4    | 0.073608636 | -0.078116525 | 0.074869159 | 0.070044215  |
| CNTN1   | 0.07400748  | 0.063501603  | 0.368155176 | 0.008884303  |
| FLOT2   | 0.082467567 | 0.097067027  | 0.0000156   | 0.042904223  |
| SC6A1   | 0.084970536 | -0.07677854  | 0.099275362 | -0.027339922 |
| SLC25A5 | 0.090258084 | -0.072452729 | 0.096788613 | -0.024736436 |
| DIRA2   | 0.091623444 | -0.073568035 | 0.00000831  | -0.08035041  |
| KCC2A   | 0.091623444 | -0.199743381 | 0.614260963 | 0.008237282  |
| ITPR1   | 0.095335183 | -0.293542755 | 0.925291596 | 0.001596736  |
| RGS7    | 0.099233496 | -0.071816821 | 0.138344884 | 0.019549226  |
| 4F2     | 0.112433573 | -0.064952678 | 0.001893313 | 0.056438921  |
| DYN2    | 0.112822407 | 0.097274151  | 0.975224689 | -0.000444032 |
| CACB3   | 0.112925952 | -0.076804027 | 0.018549304 | -0.030395422 |
| NOS1    | 0.112925952 | 0.104756423  | 0.136372258 | -0.03211862  |
| SAR1B   | 0.112925952 | 0.065268806  | 0.253155905 | -0.01074845  |
| DYN1    | 0.113964091 | 0.101892267  | 0.014331743 | 0.036834337  |
| NRXN1   | 0.113964091 | -0.089315479 | 0.017605625 | 0.022406372  |
| GDAP1   | 0.133743415 | -0.051178677 | 0.108694397 | 0.015842114  |
| EAA2    | 0.144166966 | -0.057980652 | 0.000482498 | 0.149062385  |
| GPDM    | 0.14459578  | -0.06458769  | 0.002601374 | 0.040557411  |
| GRM2    | 0.164634986 | -0.055504387 | 0.00225209  | -0.067125626 |
| GRIA1   | 0.186840969 | -0.122227018 | 0.059861772 | 0.023857932  |
| SNP25   | 0.19265954  | -0.049598461 | 0.064588857 | -0.034780934 |
| NNTM    | 0.20454214  | -0.060640784 | 0.55971979  | -0.004561984 |

|       |             |              |             |              |
|-------|-------------|--------------|-------------|--------------|
| CNTP1 | 0.222332012 | 0.068439692  | 0.321912122 | -0.01397454  |
| NEGR1 | 0.228702835 | 0.056127111  | 0.170366055 | 0.017904469  |
| RUFY3 | 0.228702835 | -0.058988773 | 0.457928328 | -0.005978235 |
| AAKG2 | 0.27393567  | -0.062505403 | 0.091696004 | -0.019750282 |
| SEPT3 | 0.281875698 | -0.038393335 | 0.709634976 | 0.003854892  |
| NCPR  | 0.300220027 | -0.067752731 | 0.000000236 | 0.061283995  |
| KAD4  | 0.33282738  | 0.063528967  | 0.000028    | 0.080344229  |
| EGFR  | 0.352508231 | -0.045780139 | 0.037646952 | 0.067304167  |
| VDAC3 | 0.361892221 | -0.03648722  | 0.941795926 | 0.000734851  |
| CKAP5 | 0.368572472 | -0.043220601 | 0.161620091 | 0.011359435  |
| VAPB  | 0.370013123 | -0.053906222 | 0.454454714 | -0.008248337 |
| DMXL2 | 0.371944451 | -0.066683491 | 0.000558014 | -0.037087711 |
| CLAP2 | 0.381605033 | 0.059996135  | 4.65E-11    | -0.066473568 |
| L1CAM | 0.381605033 | -0.075124602 | 0.025021401 | 0.03497399   |
| NCAM2 | 0.381605033 | -0.061154173 | 0.193404313 | 0.013383947  |
| VGLU1 | 0.403174945 | -0.030808464 | 0.806929566 | 0.004622163  |
| AOFB  | 0.418027293 | 0.048514898  | 4.05E-15    | 0.148912654  |
| SRC   | 0.418027293 | 0.027261985  | 0.024975616 | 0.024557313  |
| XPOT  | 0.441975458 | 0.05701766   | 0.015257576 | 0.020389157  |
| ABR   | 0.455594442 | -0.056181029 | 0.544057791 | -0.005083873 |
| ANK3  | 0.464985125 | 0.05942761   | 0.000892405 | -0.043513813 |
| RP3A  | 0.464985125 | -0.04620774  | 0.031400312 | -0.043300882 |
| NCAM1 | 0.464985125 | -0.040058468 | 0.173236213 | 0.01625614   |
| GNAO  | 0.467383962 | 0.039404812  | 0.049180271 | -0.024825585 |
| VPP1  | 0.468593618 | -0.023738156 | 0.573678388 | -0.005408781 |
| NCAN  | 0.520088411 | 0.056297124  | 0.594532127 | -0.013576749 |
| NLGN2 | 0.538896167 | -0.052876346 | 0.025137024 | 0.026201348  |
| FARP1 | 0.564639738 | -0.028239628 | 7.61E-08    | 0.070865746  |
| AT1A1 | 0.600409661 | -0.021027343 | 0.01712302  | 0.042296928  |
| BAIP2 | 0.604753931 | -0.030431516 | 0.759969049 | 0.004861831  |
| KCNA1 | 0.61922452  | -0.026502402 | 5.89E-09    | -0.129599336 |
| GNAZ  | 0.6344914   | -0.025453458 | 0.167977725 | -0.014676209 |
| CNTN2 | 0.63655502  | -0.026719546 | 0.040556693 | -0.06870187  |
| GBRB3 | 0.762547631 | 0.023819598  | 0.001141696 | 0.038996205  |
| ANXA3 | 0.762547631 | -0.019726012 | 0.015027668 | 0.083013657  |
| RHOB  | 0.778101065 | -0.01499516  | 0.31285588  | 0.01963059   |
| SYT7  | 0.78649511  | -0.018239235 | 0.140977689 | -0.020290437 |
| AKA12 | 0.788346743 | -0.011369236 | 0.00000669  | 0.06929371   |
| CTNB1 | 0.812451363 | 0.013532632  | 0.036809418 | 0.017451135  |
| STX1A | 0.812451363 | -0.010910181 | 0.058420254 | -0.030477403 |
| NFASC | 0.812451363 | 0.017908453  | 0.186722795 | -0.020858553 |
| VAPA  | 0.812451363 | -0.013128629 | 0.269764562 | -0.006988996 |
| STX1B | 0.812451363 | -0.009589617 | 0.336683862 | -0.016085349 |
| MARE2 | 0.812451363 | -0.008754143 | 0.549448793 | 0.007333039  |
| GNAQ  | 0.863975183 | -0.006609444 | 0.167191797 | -0.009683372 |
| VATC1 | 0.874207501 | -0.008349436 | 0.6072197   | -0.005263703 |
| GNAI1 | 0.919349953 | 0.00692514   | 0.011478471 | -0.037926446 |
| CXA1  | 0.919840997 | 0.015177743  | 0.000225541 | 0.168622547  |
| VATE1 | 0.929514663 | -0.004137909 | 0.93592266  | -0.000983034 |
| GNAS  | 0.937222308 | 0.005975025  | 0.42086518  | 0.009131773  |
| NTRI  | 0.989323102 | -0.001482651 | 0.121663293 | 0.016297887  |
| SYN2  | 0.989323102 | -0.003067691 | 0.949775379 | -0.00107472  |
| GPM6A | 0.991524502 | 0.001105596  | 0.04883541  | 0.022846092  |
| EF1A1 | 0.991524502 | -0.003161141 | 0.06961146  | 0.021948037  |
| GBB1  | 0.991524502 | 0.000838472  | 0.459314576 | -0.005793046 |

Reports the aligned adjusted p-values and Sz-control fold-changes from the synaptosome proteome experiment in the present study and adjusted p-values and Sz-control fold-changes from a meta-analysis of transcriptome studies in Sz tissue (Gandel et al. 2018).

**eTable 14. List of Protein SRMs from Assay Stages**

|                                         | Homogenate | Synaptosome |
|-----------------------------------------|------------|-------------|
| Assayed                                 | 478        | 478         |
| Passed Quality Controls                 | 402        | 348 (155)   |
| Sz vs Control unadjusted Limma p < 0.05 | 110        | 83          |
| Sz vs Control adjusted Limma p < 0.05   | 55         | 64          |

Reports the number of proteins for which SRMs were **1.** Assayed in the MS run; **2.** Passed quality control; **3.** Were altered between Sz and control (unadjusted Limma p < 0.05); and **4.** Were altered between Sz and control (adjusted Limma p < 0.05). \* denotes the proteins that were enriched in synaptosomes (over homogenates) in controls.



## eMethods. Participants and Materials

**Human Subjects and Tissue Collection:** Brain specimens from all subjects were obtained during autopsies conducted at the Allegheny County Office of the Medical Examiner after receiving consent from the next-of-kin. An independent panel of experienced clinicians made consensus Diagnostic and Statistical Manual of Mental Disorders Fourth Edition (DSM-IV) diagnoses using a previously described method(1). 48 pairs of Sz and control subjects (matched by age, sex, race, and PMI, **Table 1 & eTable 1**) were studied. Control subjects underwent identical assessments and were determined to be free of lifetime psychiatric illness. Procedures were approved by the University of Pittsburgh Institutional Review Board and Committee for Oversight of Research Involving the Dead. Grey matter was harvested from the auditory cortex as previously described(2, 3): Tissue slabs containing the superior temporal gyrus with Heschl's Gyrus (HG) located medial to the planum temporal were identified, and the superior temporal gyrus (STG) removed as single block. The samples were then distributed in a block design for preparation and analysis to evenly distribute SCZ and control samples and blind the experimenters during sample preparation, analysis, and peak integration. Grey matter was collected from HG by taking 40  $\mu\text{m}$  sections and frozen at  $-80\text{ }^{\circ}\text{C}$ (2).

**Antipsychotic Drug Treated Monkey Tissue:** The tissue utilized here was obtained from previously completed experiments that have been extensively described previously(4). Briefly: 18 male monkeys,  $n = 6$  per group, were administered therapeutically relevant doses of haloperidol, olanzapine, or vehicle. Tissue slabs containing the superior temporal gyrus were removed in a single block and 50 mg of grey matter was harvested as described above.

**Sample Preparation:** Total Homogenate and Synaptosome preparations were obtained using a variation on the sucrose density gradient centrifugation method we have previously validated for use in human postmortem brain tissue(5, 6). Briefly: 50 mg of human A1 grey matter, 50 mg monkey STG grey matter, or one mouse brain hemisphere were homogenized in 0.32 M Sucrose, 0.1 mM  $\text{CaCl}_2$ , 1mM  $\text{MgCl}_2$  with 1 x Protease and Phosphate Inhibitors (Sigma) (10  $\mu\text{l}$ /mg brain tissue) on ice in a 1 ml glass Dounce homogenizer with a Teflon pestle. 40  $\mu\text{l}$  of this crude homogenate is mixed with 10  $\mu\text{l}$  10% SDS, vortexed, sonicated, and cleared by centrifugation to prepare the "Total Homogenate" (Hom). The remainder of crude homogenate is clarified at  $800 \times g$  for 10 min at 4C and 750  $\mu\text{l}$  of the supernatant is adjusted to 1.25 M sucrose in a final volume of 1875  $\mu\text{l}$ . The 1.25 M sucrose-homogenate is laid between 5 ml of 1.5 M sucrose (bottom) and 1.5 ml of 1 M sucrose (top) and spun at 24,000 RPM for 3 hrs (4C) in a TH641 swing arm rotor. The band at the 1.25-1.5 M interface is collected into 10 ml 0.05 mM  $\text{CaCl}_2$  and spun at 18,000 RPM for 20 min in a TH641 swing arm rotor. The pellet is taken up in 40  $\mu\text{l}$  100 mM Tris, pH 7.4, 2% SDS (1X Protease and Phosphate Inhibitors, Sigma), vortexed, sonicated, and cleared by centrifugation to prepare the "Synaptosomes" (Syn). Total protein concentration in the Hom and Syn preparations were assessed by micro BCA (Pierce).

**[ $^{13}\text{C}_6$ ]brain ISTD:** The [ $^{13}\text{C}_6$ ]lysine-labeled brain proteome internal standard ([ $^{13}\text{C}_6$ ]brain ISTD) is prepared by homogenizing cerebral cortex tissue from a Stable Isotope Labeling in Mammals (SILAM) mouse (Cambridge Isotopes). These animals are raised on a diet in which the only source of Lysine is  $^{13}\text{C}_6$  labeled, resulting in near complete (99%) labeling of the animal proteome in three generations. Labeling efficiency of each [ $^{13}\text{C}_6$ ]brain ISTD preparation is confirmed prior to use. To account for species differences, SRMs are designed only for peptides that have 100% homology between humans and mice(5) taking advantage of the high level of synaptic protein sequence homology between these species (7).

**Peptide SRM Development and Validation:** Method development began by building upon our previously described SRM libraries(5, 8-10) with the selection of additional proteins of interest included in published multidimensional MS/MS analyses of synaptic enrichments from mouse and human brain tissue (5, 6, 11) as well as the NIST Tandem Mass Spectral Library. Targets for inclusion in the LC-SRM/MS assay were selected with a bias toward well annotated synaptic proteins, such as glutamate receptors, kinases, phosphatases, vesicular fusion, amino acid metabolism, protein trafficking and scaffolding as well as proteins implicated by recent unbiased genetic analyses of Sz(12). Peptides for proteins of interest were then filtered based on the following criteria: 1) presence of lysine, 2) nonredundant to a selected protein or protein group (determined by

BLAST search) and 3) 100% homology across mouse and human sequences (determined by BLAST search). Ultimately, 2700 tryptic peptides from 152 proteins were selected for validation for addition to the assay. Acceptable peptide sequences, along with MS2 spectra, were imported into Skyline(13). Initially, five mass transitions were selected for each target peptide and its “heavy” counter-part. Validation experiments were performed in 1:1 ( $\mu\text{g}/\mu\text{g}$ ) mixtures of a human synaptosome preparation from a low PMI control and the [ $^{13}\text{C}_6$ ]brain ISTD. To ensure that the desired peptide was assayed, rigorous selection criteria were employed for the inclusion of peptide SRM transitions. Candidate “light”/“heavy” peptide SRMs were evaluated manually in Skyline for A) retention time, B) similar y-ion ratios (within 25%) to each other and database MS2 spectra, and D) a signal-to-noise ratio greater than 3. Peptide SRM pairs for which more than one identical peak was observed were omitted. Ultimately, SRMs for 825 peptides unique to 478 proteins (combined from this round of method development and our published studies) were validated at time of assay.

**Reproducibility of Peptide Quantification and Calculation of Protein Level Measures:** To assess variabilities from sample preparation and MS analysis, coefficients of variation (CVs) were calculated for each data cohort based on peptide values from the enrichment, pooled controls, and MS controls (**Figure 1**). Peptides with CVs > 0.5 in the MS control were discarded. For multiple peptides mapped to the same protein, their mean abundance value, inversely weighted based on the sum of CVs from all three of the control series, was used as the protein-level measure for the downstream analysis. Of the peptide SRMs described above, 777 unique to 408 proteins were quantified in the human homogenates and 575 peptides unique to 351 proteins (a subset of the 408 homogenate proteins) were quantified in human synaptosome. Mean CV for peptide quantification in the human experiments was 0.12 (SD = 0.09) in the homogenates, 0.17 in synaptosomes (SD = 0.12) (**eFigure 2**).

**Differential Expression Analysis:** Limma-Voom(14) was performed to detect the difference between Sz and control samples in homogenate and synaptosome proteins, respectively. We estimated the correlation between paired subject samples using R function “duplicateCorrelation”. Empirical Bayes statistics were used to rank the proteins in the order of evidence for differential expression. The moderated t-statistics (based on the moderated standard errors for increased statistical power), p-values and q-values were obtained (eTables 1 and 2 in Supplement 2). Similar analyses using Limma-Voom were performed with pH and pH + Age added as covariates. T-tests were performed on protein data from monkey samples to compare haloperidol or olanzapine group versus the vehicle group.

**Effects of PMI:** One-way ANOVA was used to assess the effects of PMI on homogenate and synaptosome protein levels, respectively. The levels of all proteins for which an effect of PMI was detected (uncorrected  $p < 0.05$ , **eTables 3 & 5 in Supplement**), were plotted versus PMI and inspected by the senior author, blinded to protein identification. Proteins that displayed a step-wise increase or decrease (**eFigures 3 & 4**) were discarded while those that displayed linear or curved increase or decrease (and could presumably be controlled for by PMI matching) were retained (**eFigure 3**). PMI had an effect (uncorrected  $p < 0.05$ ) on the levels of 60 proteins in homogenate and 70 proteins in synaptosomes (**eTables 3 & 5**). Of these, six in homogenate (B4DV12, E41L3, GFAP, PRDX1, TPIS, and DYN3) and four in synaptosomes (HS12A, KPCA, SYN1, and 2A5D) displayed step-wise alterations across PMI (**eFigures 3 & 4 in supplement**) and were dropped from analysis.

**Network Analysis:** Weighted Gene Co-expression Network Analysis (WGCNA)(34) was used to investigate the pattern of co-regulated protein expression. First, for homogenate and enriched synaptosome proteins, we performed exploratory WGCNA on Sz and control samples, separately. Then, we conducted module preservation analyses to test whether the modules identified from the Sz samples were preserved in the control samples, or vice versa (Figure S5) (35). Since all the modules detected from Sz samples were modestly to strongly preserved in the control samples and vice versa, we constructed protein co-expression networks using combined Sz and control samples, for homogenate (402 proteins) and enriched synaptosome (155 enriched proteins), respectively. Module membership was characterized for Gene Ontology terms by functional enrichment using DAVID(36). The two networks were visualized using Cytoscape. To quantitate the representation of protein levels in each module, we calculated the first principal component of modules given by WGCNA, referred to as the module-specific Eigenprotein (**eTables 7 & 8**). Sz-control differences between

module-specific Eigenproteins were assessed by Student's t-test. A linear regression model was fitted to model the correlation between the Eigenproteins of each module, with diagnosis and batch included as covariates.

**Comparison to PsychENCODE mRNA Findings:** Homogenate and Synaptosome protein findings from this study were compared to findings from a recent meta-analysis(15) of RNAseq studies from the PsychENCODE Consortium(16). This study integrated analyses of frontal and temporal cerebral cortex tissue from 559 Sz subjects and 936 controls. Ensembl identifiers from the RNAseq meta-analysis were mapped to UniProtKB identifiers in our data using the *Retrieve/ID mapping* tool(17), and reported fold-changes and adjusted p-values for Sz-control transcript differences extracted for the aligned proteins (**Tables S12 & S13**). Of the 402 proteins investigated in the present study, all but two (GCG: glucagon and SPTA1: Spectrin Alpha, Erythrocytic 1, proteins for which transcripts would not be expected to be present in brain tissue) were mapped mRNA transcripts. Fisher's exact test was used to assess if a significant number of homogenate or synaptosome protein alterations overlapped with the reported transcriptome differences (**eFigure 14A & B in supplement**). Additionally, linear regressions were run to assess the level of association between mRNA-homogenate protein level fold-changes and mRNA-synaptosome protein level fold-changes (**eFigures 14C & D in supplement**).

**Additional Potential Confounds:** In addition to antipsychotic medication and PMI, several other potential confounding factors were present in this cohort, including (but not limited to) pH, age, storage time, smoking tobacco, death by suicide, and schizoaffective disorder (**eTables 3 and 4 in Supplement 2**). Of these, only age significantly correlated with homogenate protein levels, and only age and pH significantly correlated with synaptosome protein levels ( $q < 0.05$ , Tables S16 and S17). Based on these findings, we ran additional Limma-voom case-control analyses including **1.** pH as a covariate and **2.** pH and age as covariates. The results of both of these analyses are included in **eTables 1 and 2 in Supplement 2**. Age did not impact our findings. Inclusion of pH had little overall effect on the associations of protein levels with diagnosis in synaptosome. Although the inclusion of this covariate did slightly increase the smallest p-values and the corresponding adjusted p-values, the rank order of association in the two analyses were highly correlated (**eTable 2 in Supplement 2**, columns L and P, **eFigure 15**). We have chosen to present the Limma-voom without pH as our primary analysis as pH cannot be disentangled from disease process. As all the tissue included in this study was obtained from individuals without prolonged agonal states (as reflected in the overall high pH across samples), pH differences are not a result of a technical or sampling artifact. Instead, mitochondrial alterations within individuals with Sz, evidenced by altered mitochondrial protein levels in both homogenate and synaptosome samples in our studies, would be expected to alter tissue pH.

**Limitations:** This study was conducted in human postmortem brain tissue. We have strived to control for confounds associated with this approach via subject matching, animal models, and statistics. Additionally, while we observed significant alterations in synaptosome protein levels future studies will be required to determine the cause of these alterations.

### eFigure 1. Synaptosome Yield, PMI, and pH in Human Tissue

Linear regression analyses of synaptosome yield ( $\mu\text{g}$  total synaptosome protein / mg tissue) with PMI (A) and pH (B).

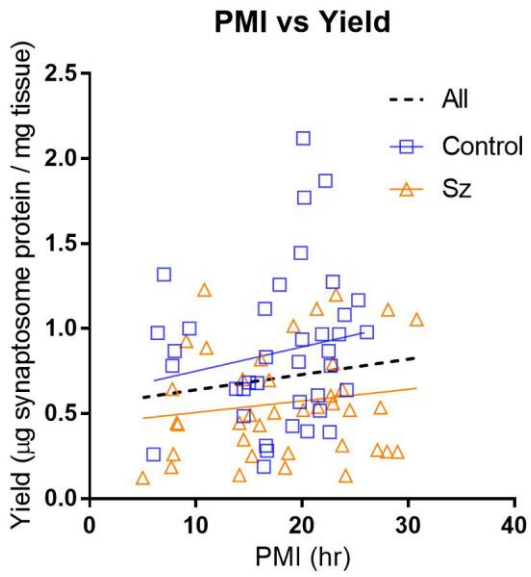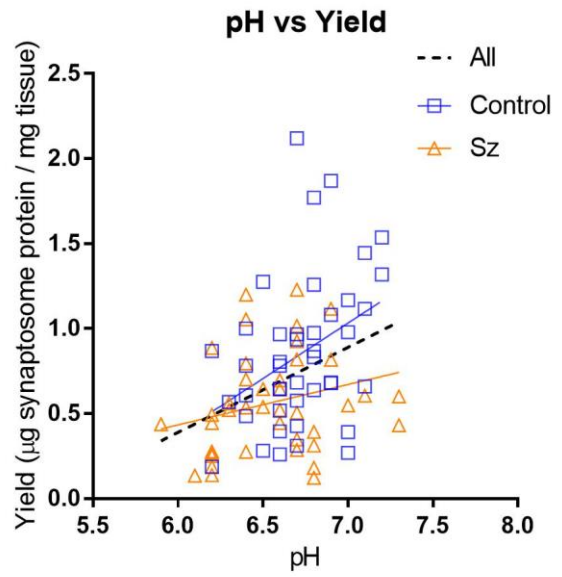

## eFigure 2. Distribution of Technical and Variance in Peptide Quantification

**A.** 777 peptides unique to 402 proteins were quantified in 12 homogenate Enrichment Controls. The mean CV was 0.12 with 75% peptide CVs < 0.17. **B.** 575 peptides unique to 348 proteins were quantified in 12 synaptosome Enrichment Controls. The mean CV was 0.17 with 75% peptide CVs < 0.19. **C.** 777 peptides unique to 402 proteins were quantified in 8 homogenate Trypsin Controls. The mean CV was 0.08 with 75% peptide CVs < 0.13. **D.** 575 peptides unique to 348 proteins were quantified in 8 synaptosome Trypsin Controls. The mean CV was 0.1 with 75% peptide CVs < 0.13. **E.** 777 peptides unique to 402 proteins were quantified in 8 homogenate MS Controls. The mean CV was 0.1 with 75% peptide CVs < 0.13.

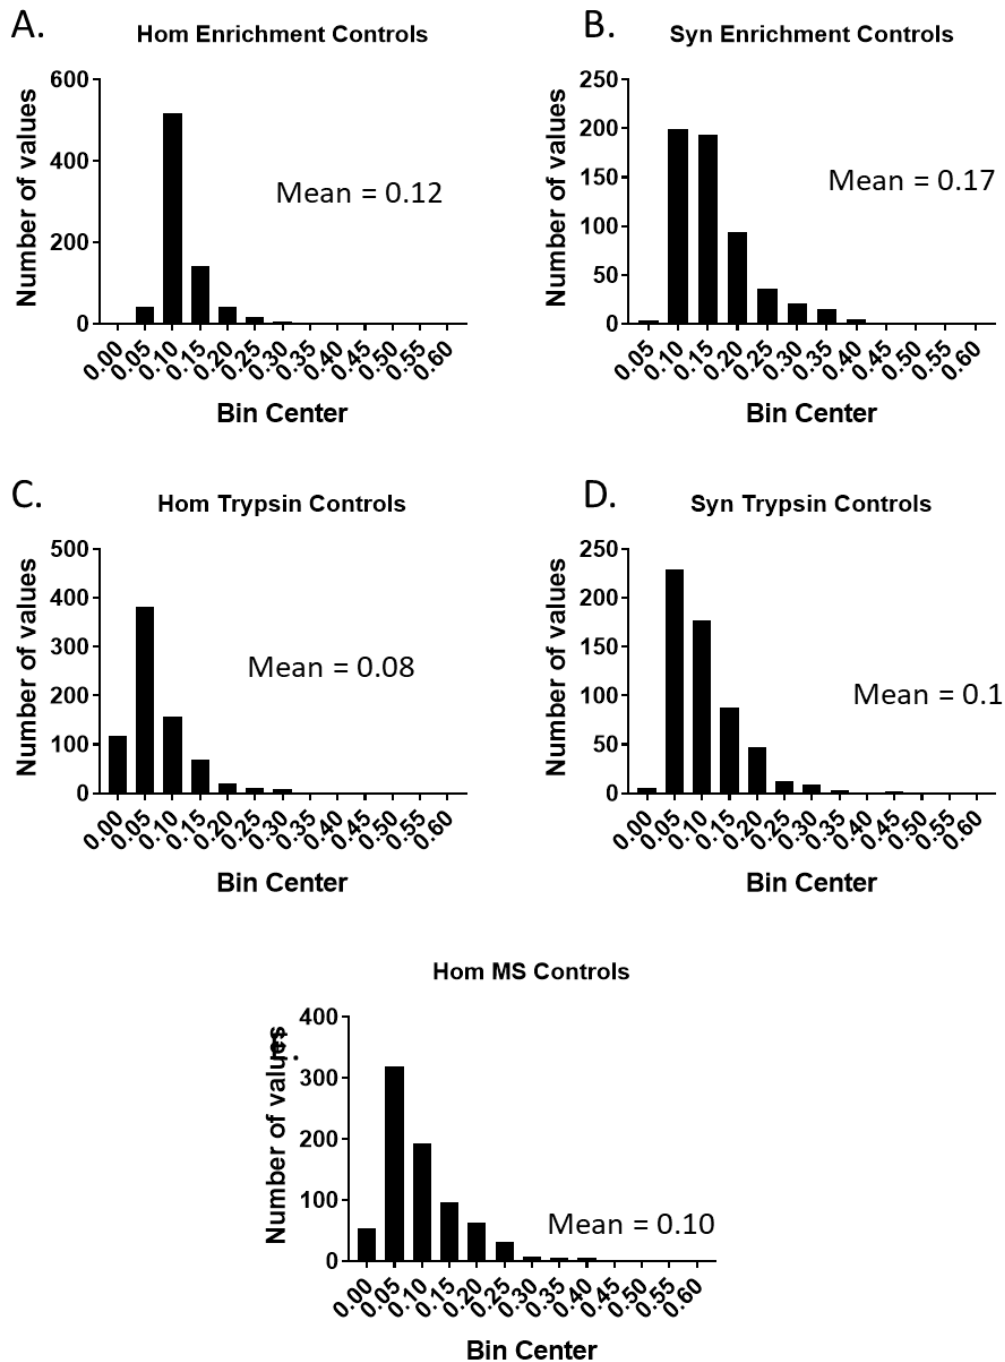



### eFigure 3. Homogenate Protein Levels and PMI in Mice

**A. – F.** show the six proteins with homogenate levels that were significantly correlated with PMI in mice with stepwise changes. These proteins were dropped from analysis. **G. - I.** show representative proteins that were retained in statistical analysis.

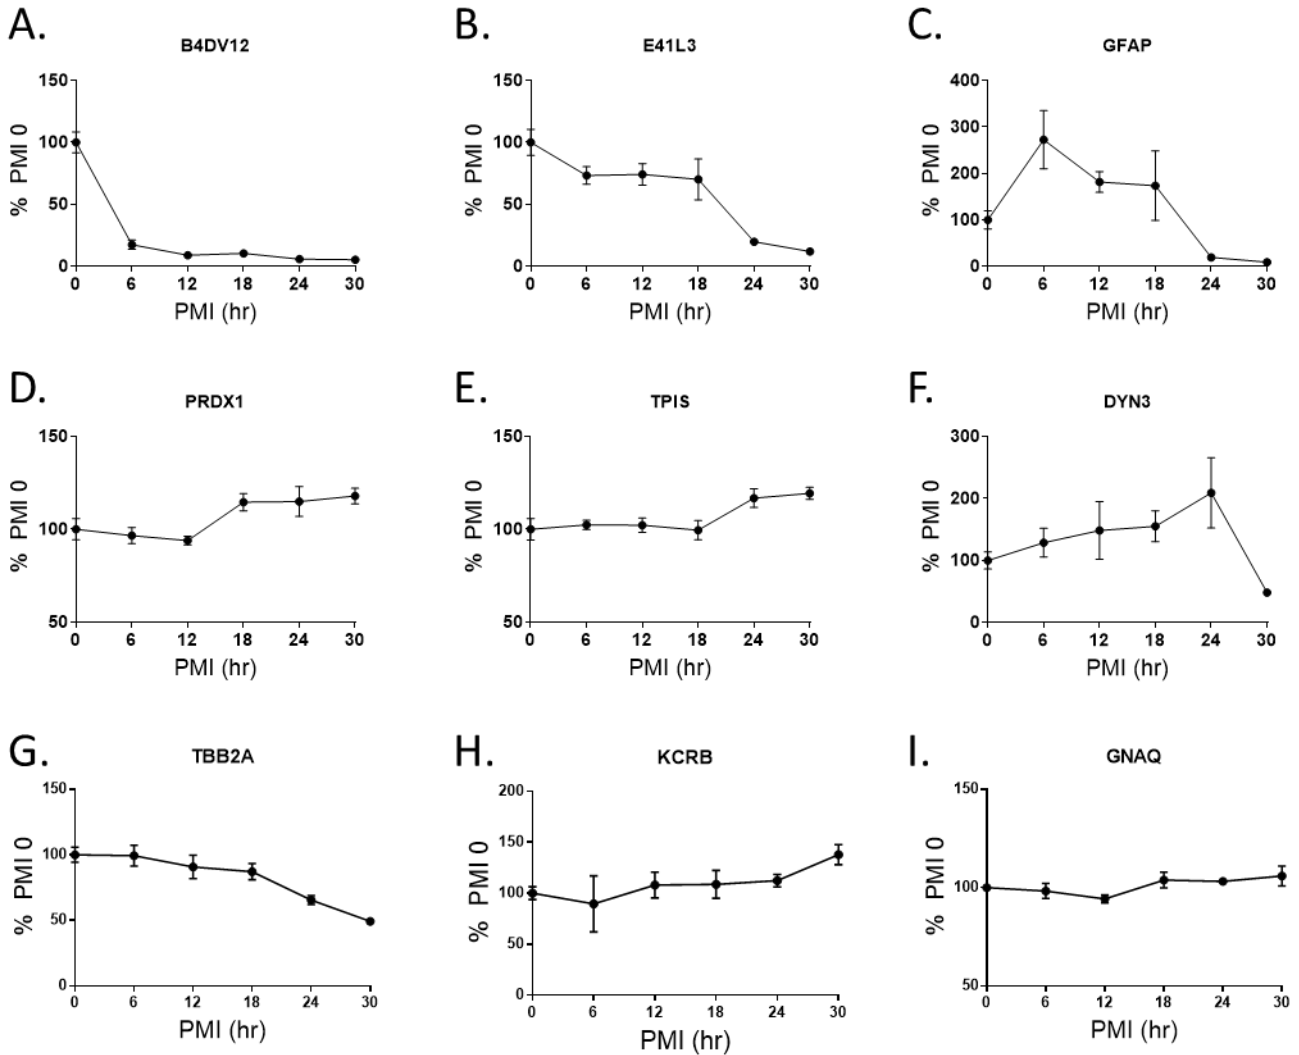

### eFigure 4. Synaptosome Protein Levels and PMI

A. – D. show the six proteins with synaptosome levels that were significantly correlated with PMI in mice with stepwise changes. These proteins were dropped from analysis.

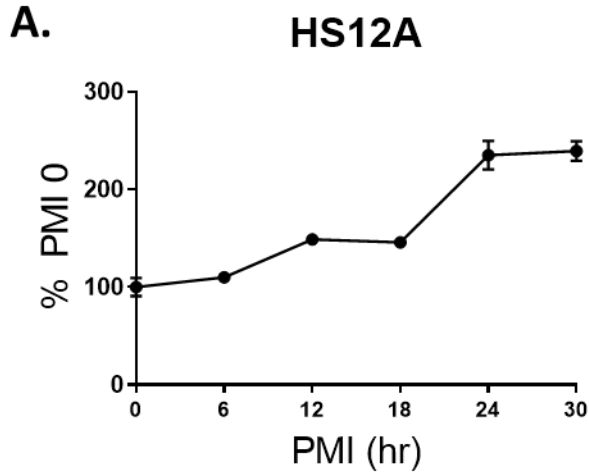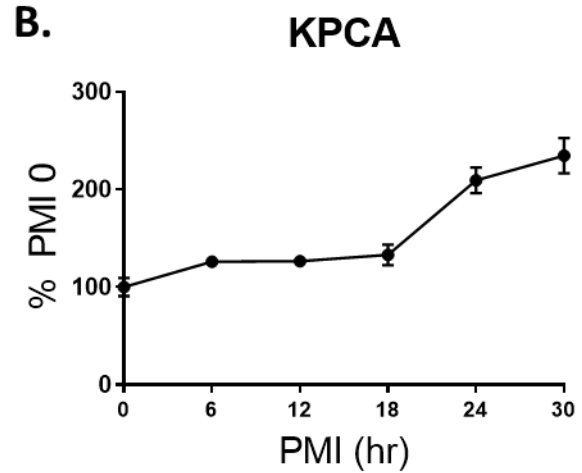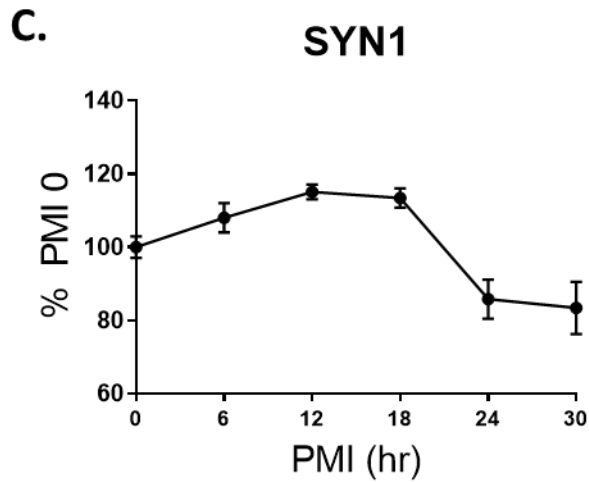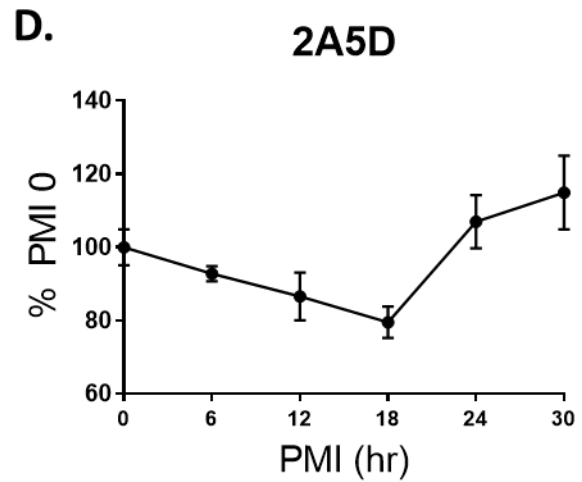

## eFigure 5. Exploratory Module Preservation Analysis

Panels **A**, **C**, **E**, and **G** show the composite statistic medianRank versus module size. The higher the medianRank, the less preserved is the module relative to other modules. Panels **B**, **D**, **F**, and **H** show the composite statistic Zsummary versus module size. Zsummary < 2 indicates no preservation, 2 < Zsummary < 10 indicates weak to moderate evidence of preservation, Zsummary > 10 indicates strong evidence of preservation. This exploratory analysis utilized different WGCNA parameters than subsequent WGCNA builds, allowing for a greater number of modules.

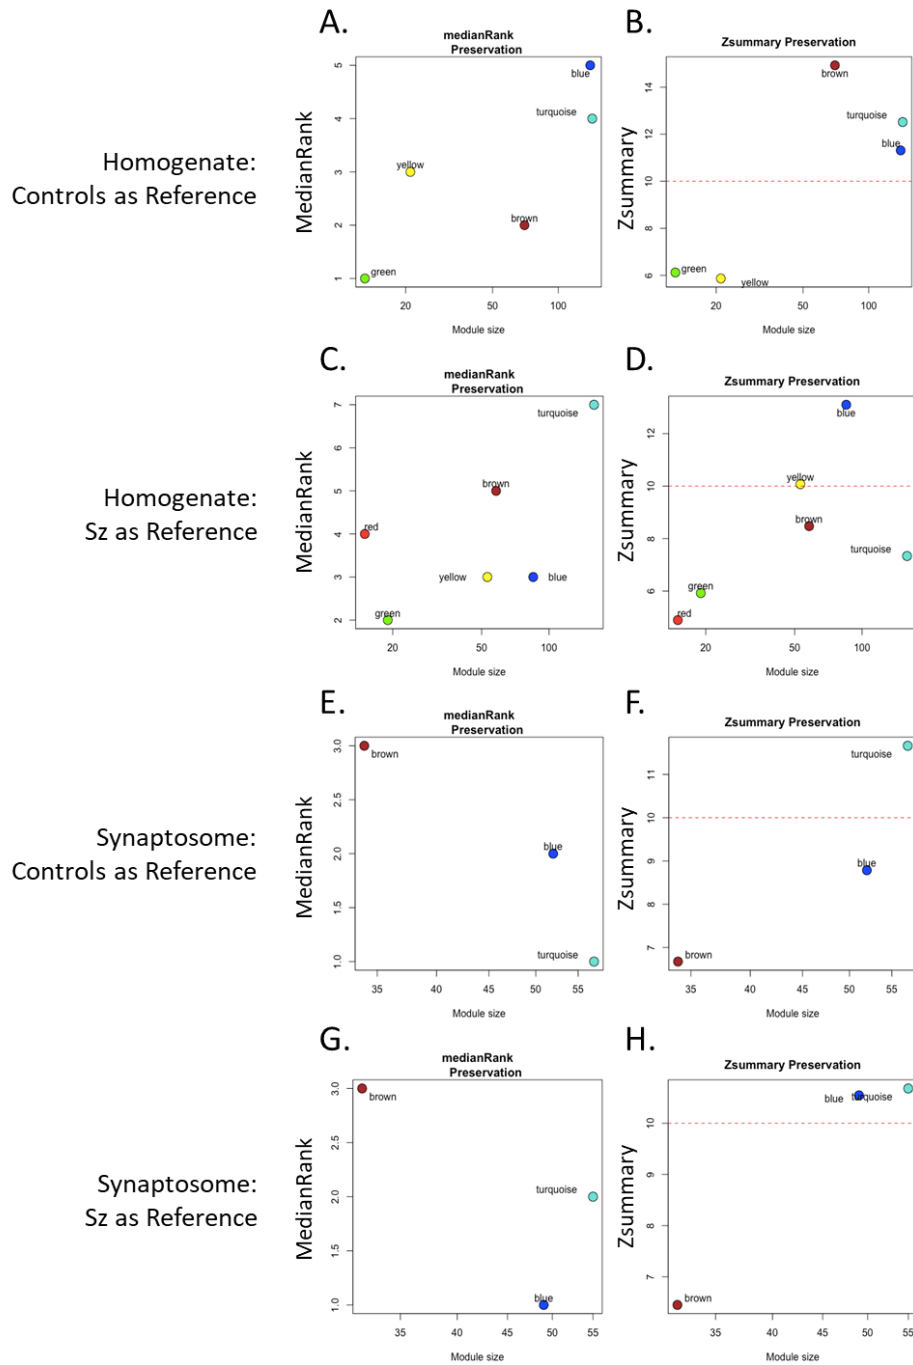

### eFigure 6. Homogenate and Synaptosome Protein Networks

Protein co-regulation networks were constructed for the homogenate (A.) and synaptosome (B.) proteomes. Greater correlation between proteins is depicted in the heat maps as intensity of red color. Clustering of proteins into different modules is shown the by dendrograms and corresponding X and Y axis color coding.

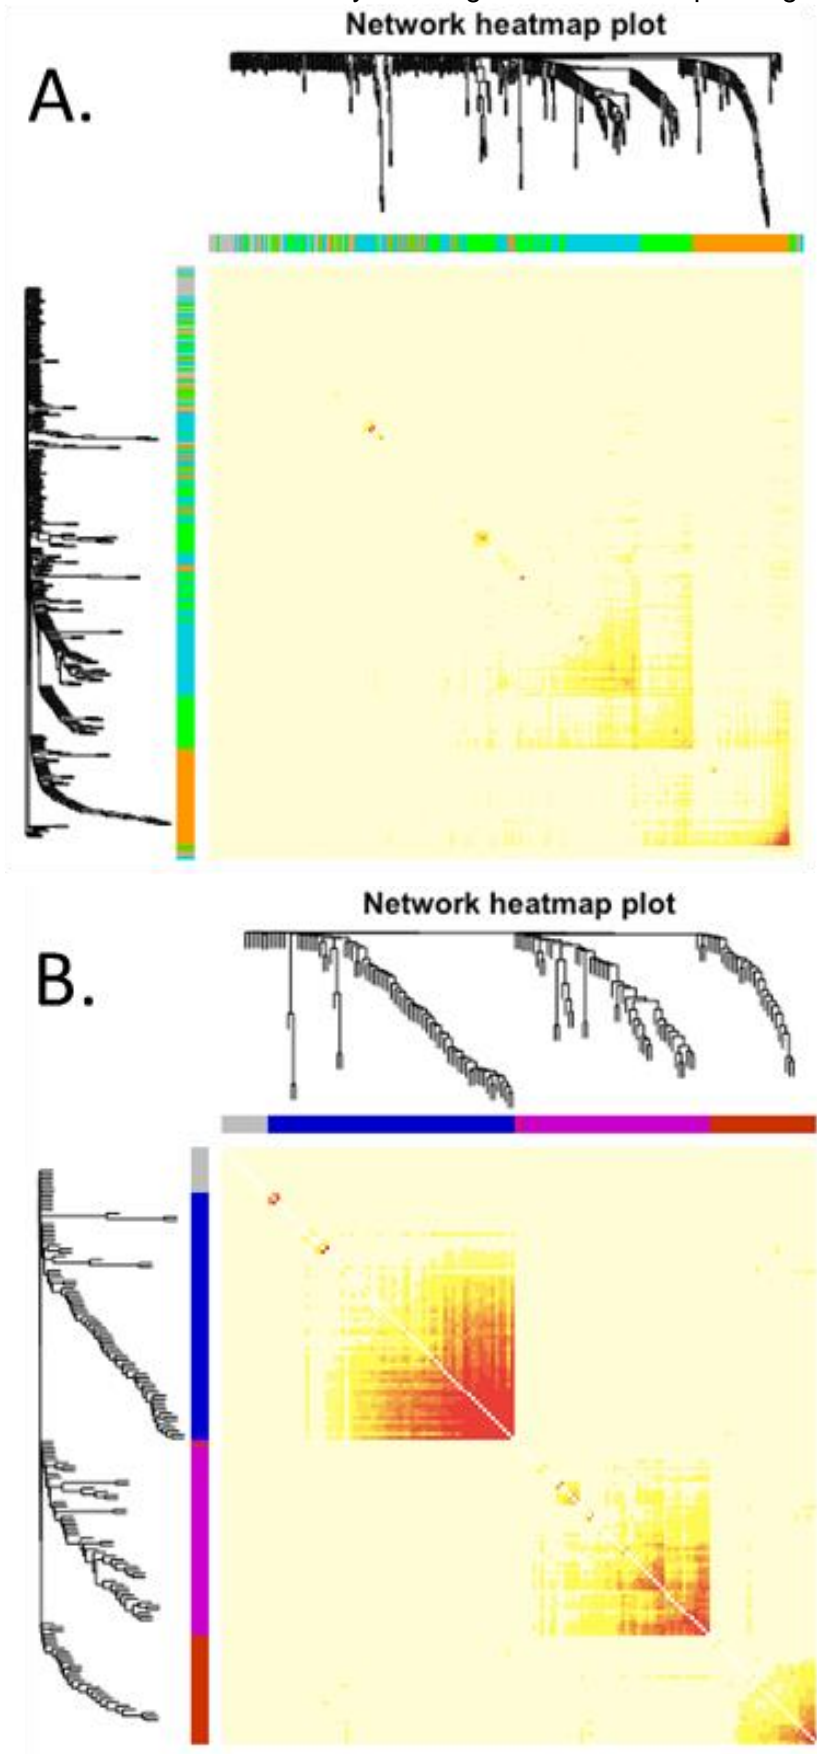

**eFigure 7. Comparison of Antipsychotic Drug Effects and Sz Alterations**

These heat maps report fold-changes between Sz and control (Sz), haloperidol and vehicle (Hal), and olanzapine and vehicle (Olz) in homogenates (A.) and synaptosomes (B.). Windows with thicker borders denote significant fold-changes in Sz ( $q < 0.05$ ) and nominally significantly fold-changes in Hal and Olz ( $p < 0.05$ ).

**A. Homogenate**

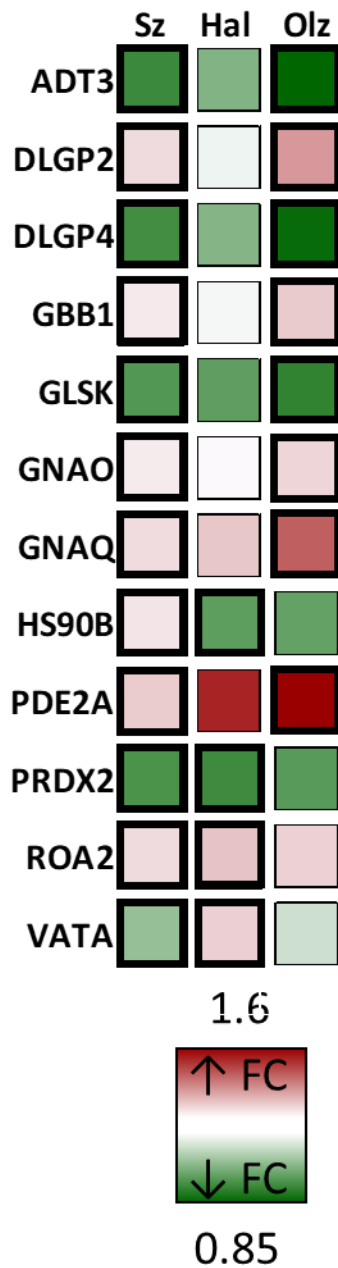

**B. Synaptosome**

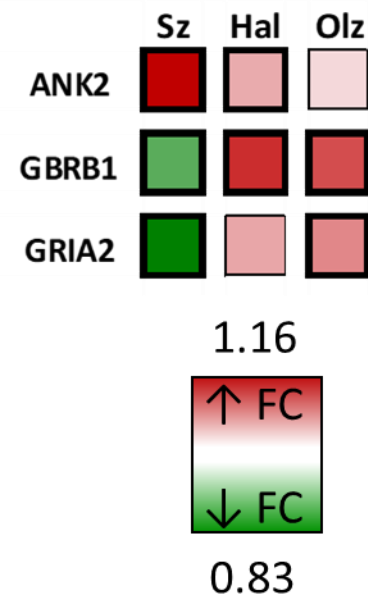

### eFigures 8-13. Expanded Chord Diagrams for All Homogenate and Synaptosome Modules

The chord figures depict the number of proteins in each module that contribute to the selected gene ontologies. p-values report the significance of enrichment for the ontology term in the modules. Proteins contributing to ontologies are depicted as rectangles, with darker colors denoting those significantly altered in Sz. Proteins not contributing to the ontologies are depicted as lines, again with darker colors denoting significant alterations in Sz.

Figure S8.  
Homogenate Turquoise

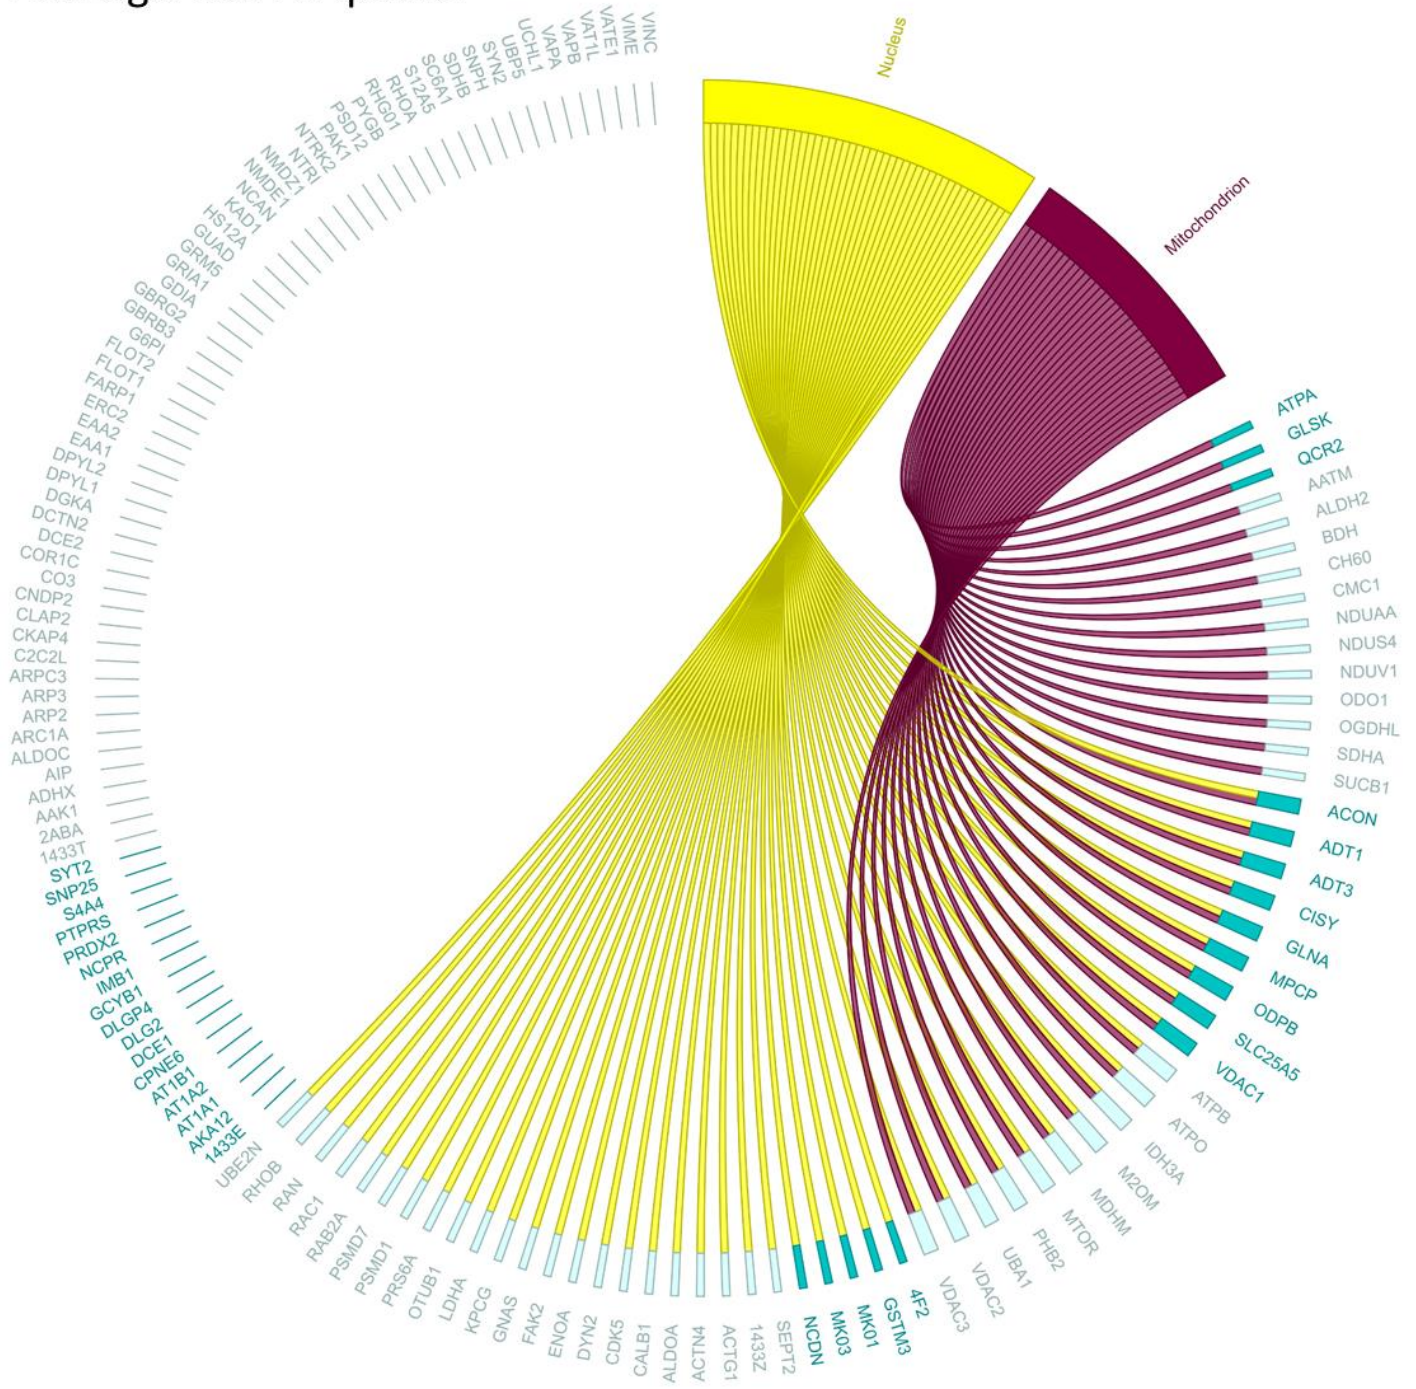



eFigure 9.  
Homogenate Orange

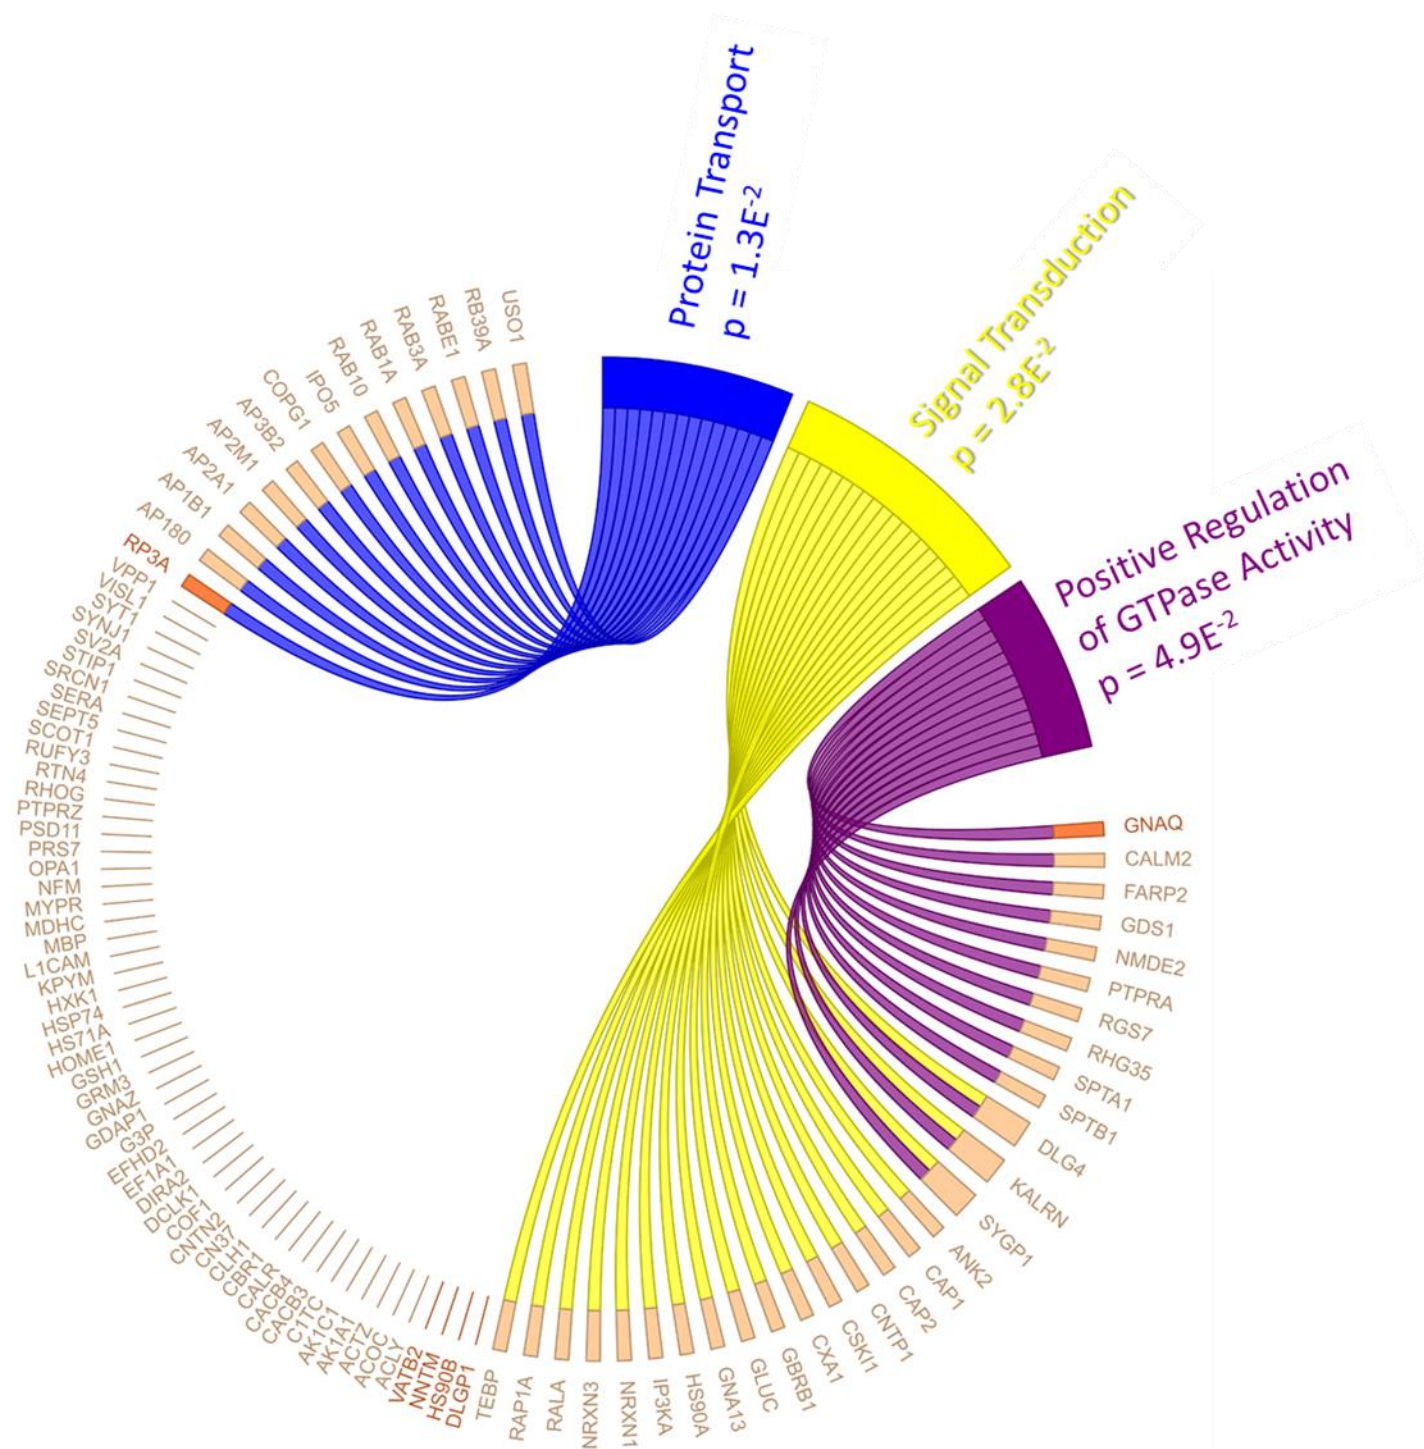

eFigure 10.  
Homogenate Green

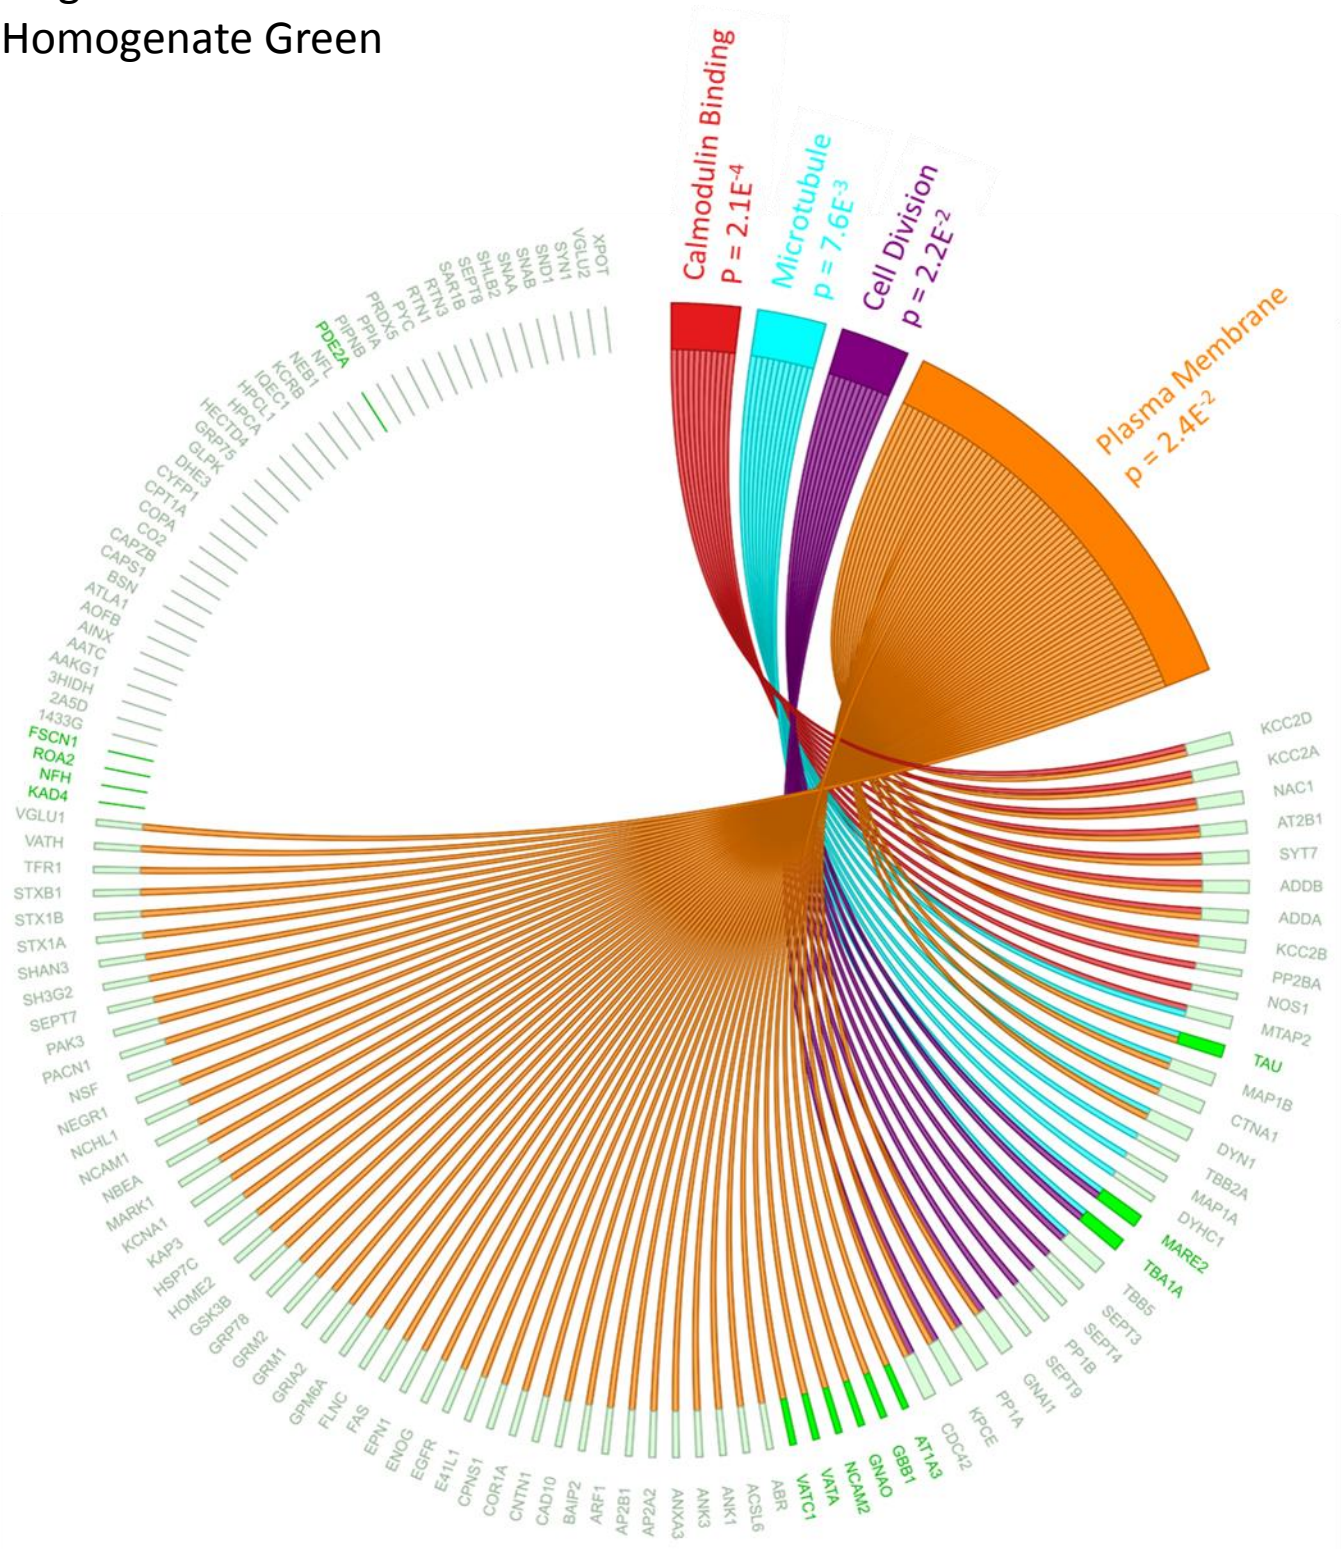





eFigure 12.  
Synaptosome Magenta

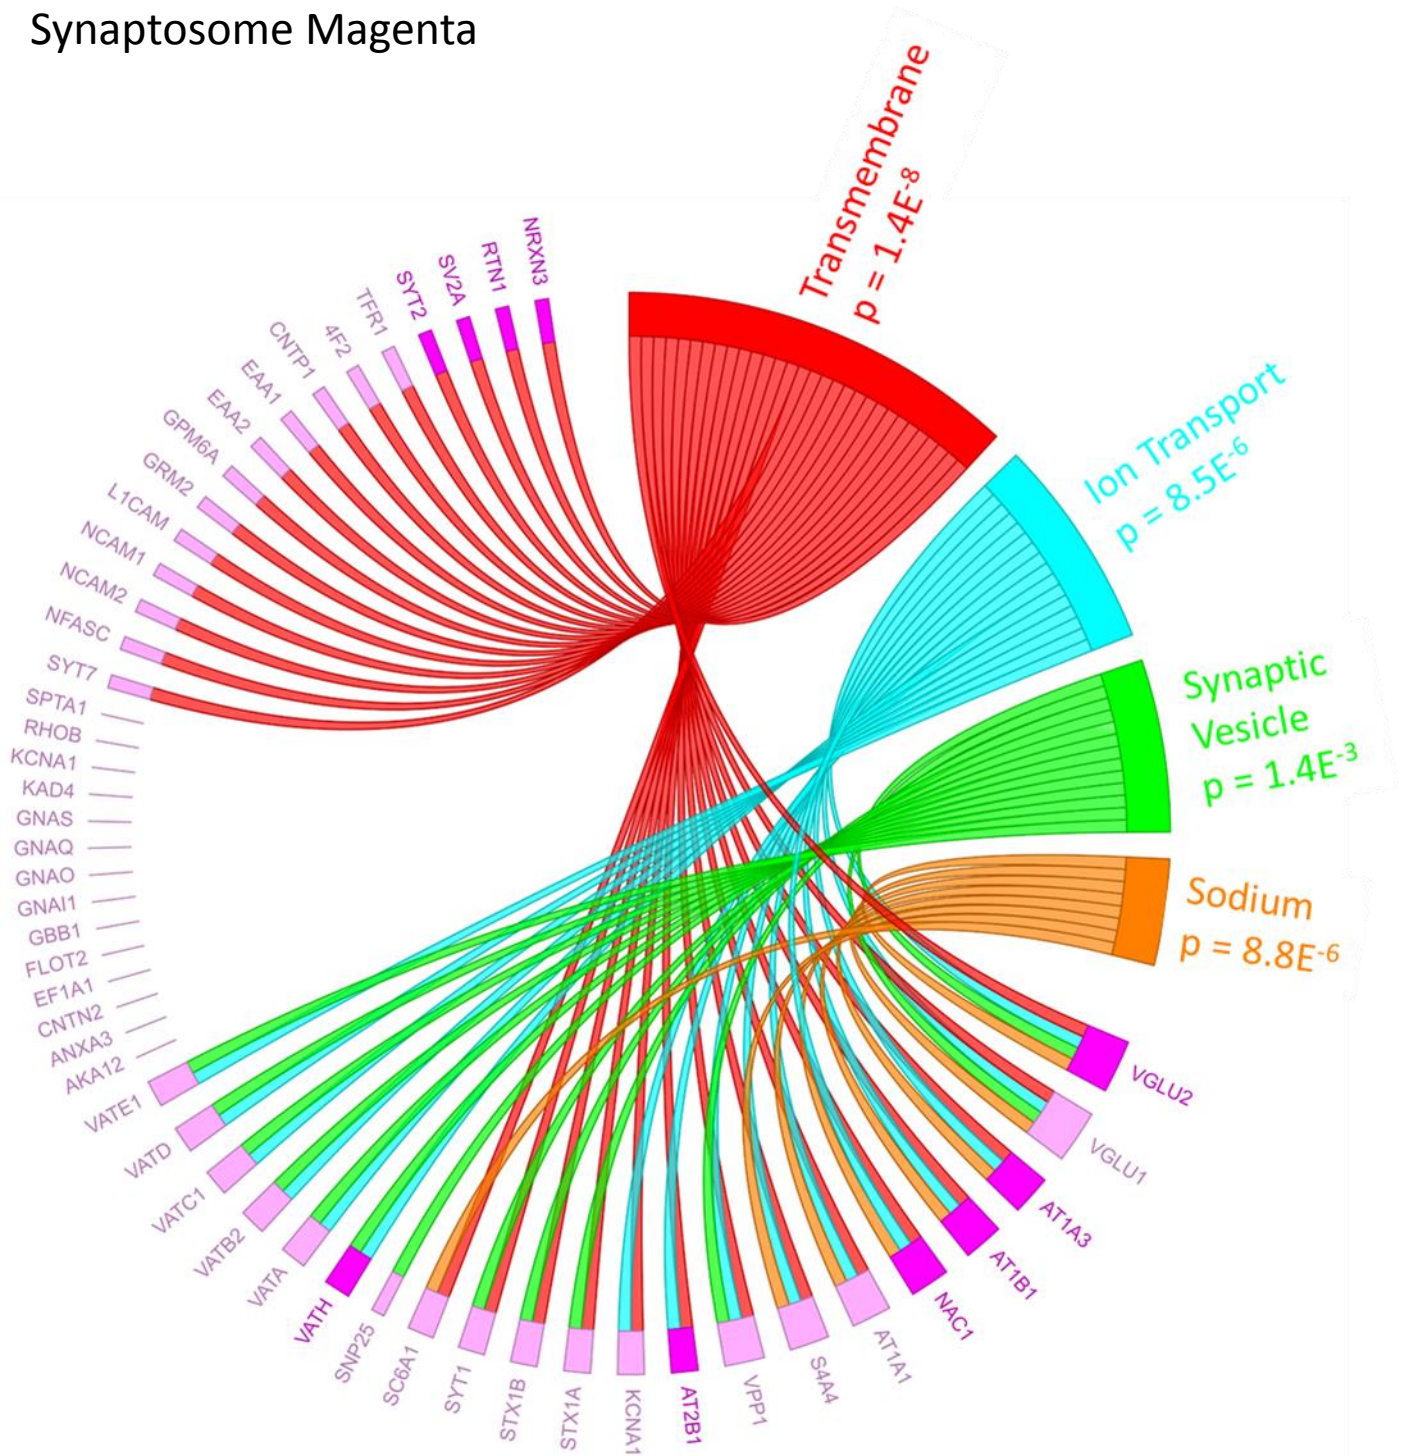



eFigure 13.  
Synaptosome Red

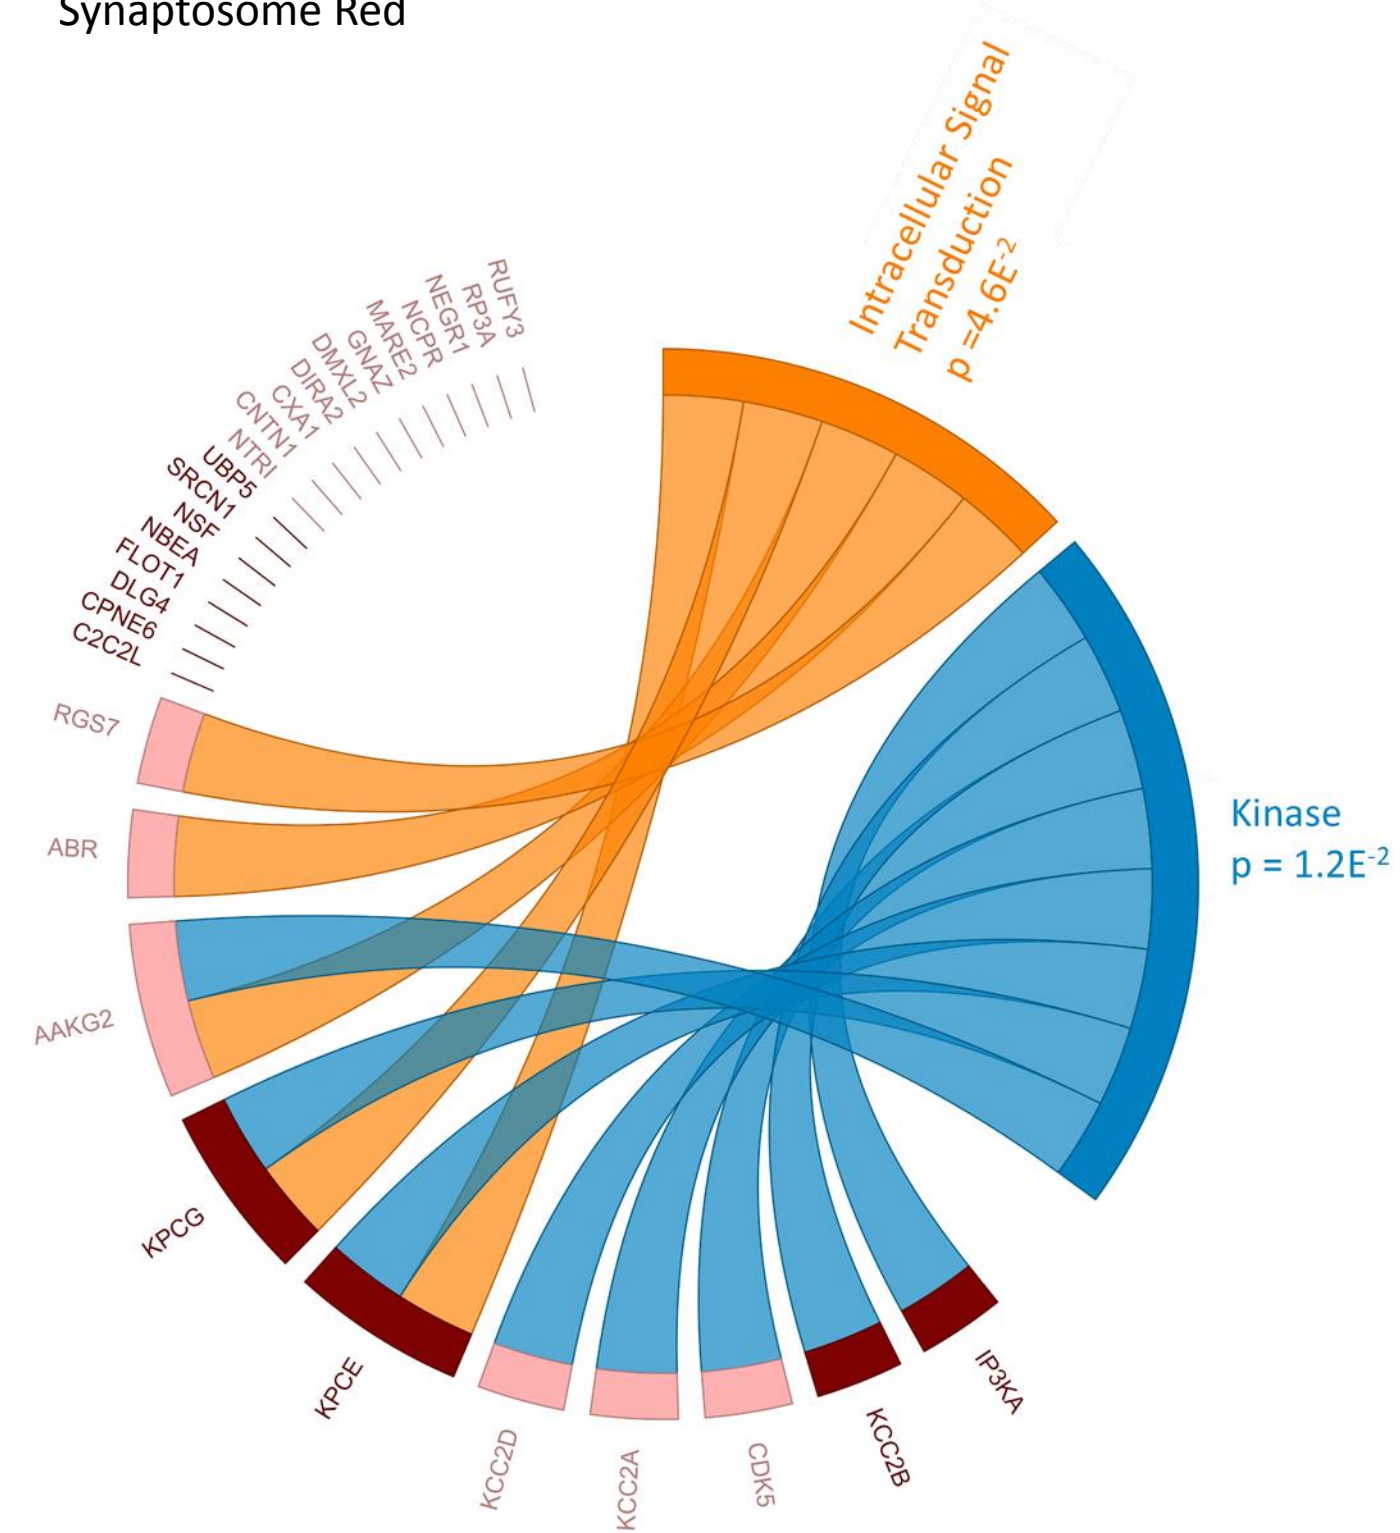

**eFigure 14.** Associations Between Module Eigenprotein Values

A. Reports the correlations between the module Eigenprotein values as a heat map. Thicker black border denotes a significant correlation ( $p < 0.05$ ). B. Plots the Eigenprotein values of the homogenate Mitochondrion module (Turquoise) as well as the synaptosome Mitochondrion & Postsynaptic Membrane module (Blue), which are correlated in controls, but not Sz.

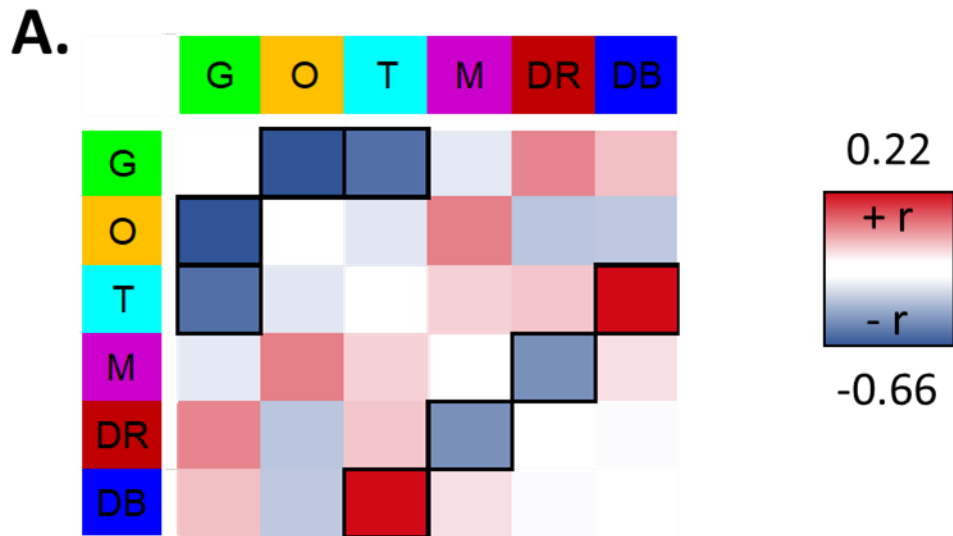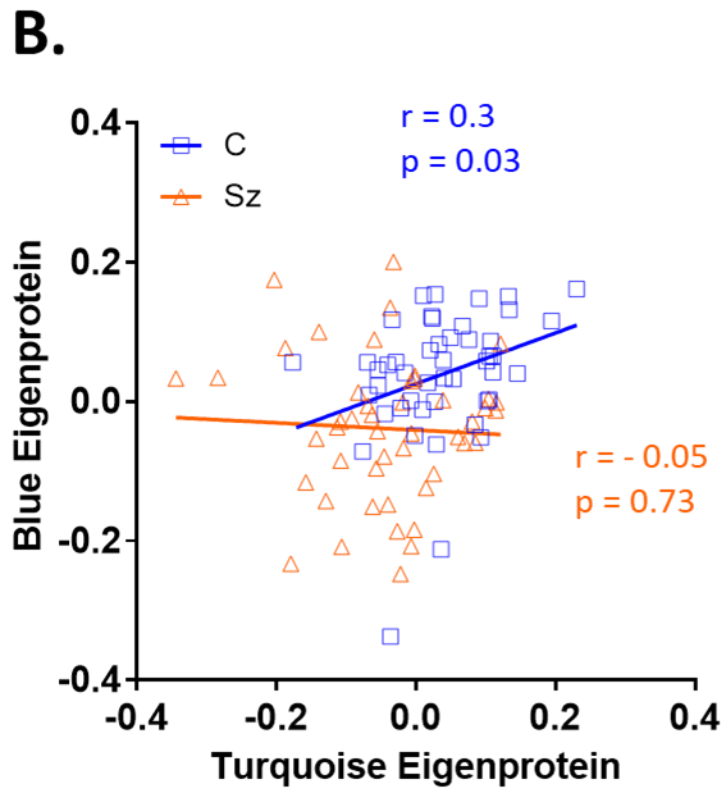

**eFigure 15. Comparison of Proteomic and Transcriptomic Analysis of Sz Tissue**

**A.** Chi-square analysis of bulk tissue RNAseq and homogenate protein level alterations. **B.** Chi-square analysis of bulk tissue RNAseq and synaptosome protein level alterations. **C.** Linear regression of bulk tissue RNAseq and homogenate protein level alterations. **D.** Linear regression of bulk tissue RNAseq and synaptosome protein level alterations.

**A.**

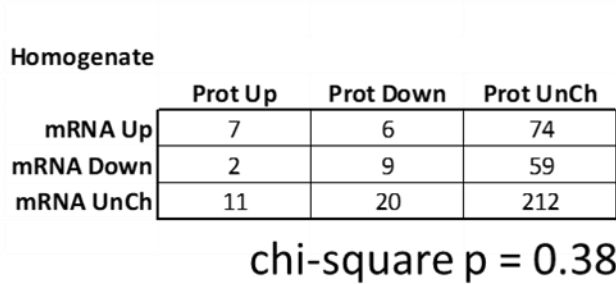

**B.**

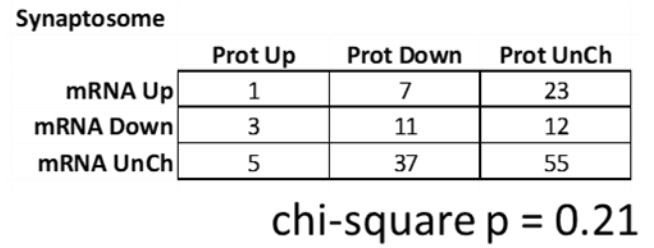

**C.**

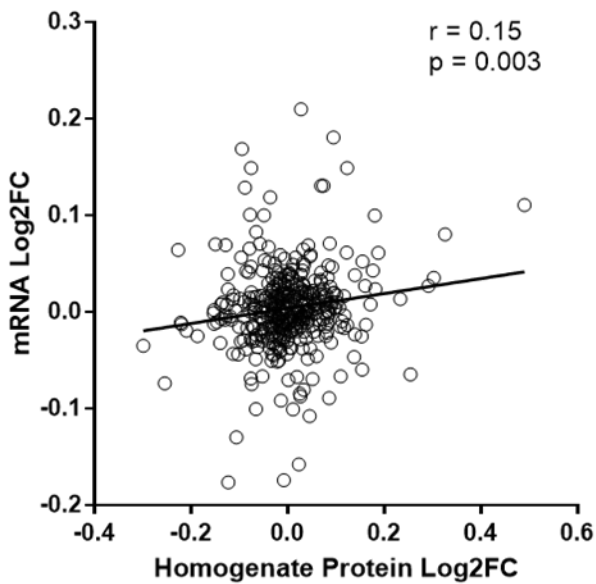

**D.**

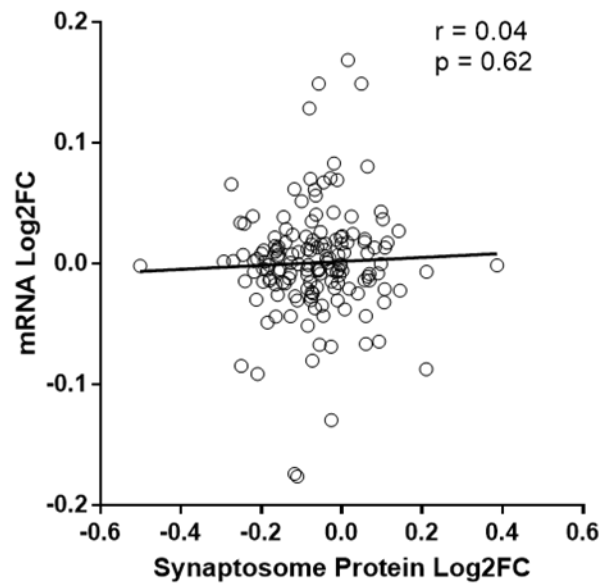

**eFigure 16. Comparison of Limma-Voom P Values With and Without pH as a Covariate**

Unadjusted p-values for the Sz-control comparison, with and without pH as a covariate, are plotted for the homogenate (A.) and Synaptosome (B.) preparations. While there was a uniform shift in p-values with the inclusion of pH, the rank ordering of the effects were largely unaltered.

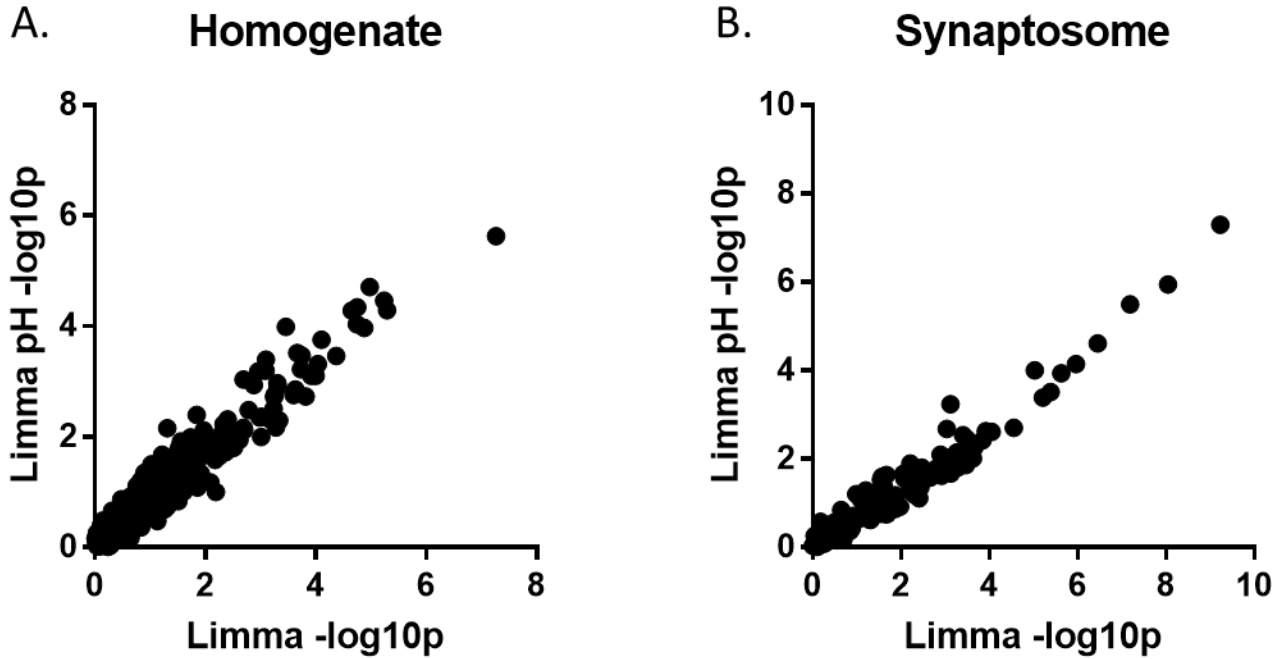

## eReferences.

1. Glantz LA, Lewis DA. Decreased dendritic spine density on prefrontal cortical pyramidal neurons in schizophrenia. *Archives of General Psychiatry*. 2000;57(1):65-73.
2. Deo AJ, Cahill ME, Li S, Goldszer I, Henteleff R, Vanleeuwen JE, et al. Increased expression of Kalirin-9 in the auditory cortex of schizophrenia subjects: Its role in dendritic pathology. *Neurobiology of disease*. 2011(Journal Article).
3. Deo AJ, Goldszer IM, Li S, DiBitetto JV, Henteleff RA, Sampson AR, et al. PAK1 Protein Expression in the Auditory Cortex of Schizophrenia Subjects. *PLoS One*. 2013;8(4):e59458.
4. Konopaske GT, Dorph-Petersen KA, Sweet RA, Pierri JN, Zhang W, Sampson AR, et al. Effect of chronic antipsychotic exposure on astrocyte and oligodendrocyte numbers in macaque monkeys. *Biol Psychiatry*. 2008;63(8):759-65.
5. MacDonald ML, Ciccimaro E, Prakash A, Banerjee A, Seeholzer SH, Blair IA, et al. Biochemical fractionation and stable isotope dilution liquid chromatography-mass spectrometry for targeted and microdomain-specific protein quantification in human postmortem brain tissue. *Mol Cell Proteomics*. 2012;11(12):1670-81.
6. Chang-Gyu H, Anamika B, Mathew LM, Dan-Sung C, Joshua K, Zhiping N, et al. The Post-Synaptic Density of Human Postmortem Brain Tissues: An Experimental Study Paradigm for Neuropsychiatric Illnesses. *Public Library of Sciences*. 2009(Journal Article).
7. Bayes A, van de Lagemaat LN, Collins MO, Croning MD, Whittle IR, Choudhary JS, et al. Characterization of the proteome, diseases and evolution of the human postsynaptic density. *Nature Neuroscience*. 2011;14(1):19-21.
8. MacDonald ML, Favo D, Garver M, Sun Z, Arion D, Ding Y, et al. Laser capture microdissection-targeted mass spectrometry: a method for multiplexed protein quantification within individual layers of the cerebral cortex. *Neuropsychopharmacology*. 2019;44(4):743-8.
9. Krivinko JM, Erickson SL, Ding Y, Sun Z, Penzes P, MacDonald ML, et al. Synaptic Proteome Compensation and Resilience to Psychosis in Alzheimer's Disease. *Am J Psychiatry*. 2018;175(10):999-1009.
10. MacDonald ML, Ding Y, Newman J, Hemby S, Penzes P, Lewis DA, et al. Altered glutamate protein co-expression network topology linked to spine loss in the auditory cortex of schizophrenia. *Biol Psychiatry*. 2015;77(11):959-68.
11. Trinidad JC, Thalhammer A, Specht CG, Lynn AJ, Baker PR, Schoepfer R, et al. Quantitative analysis of synaptic phosphorylation and protein expression. *Molecular & Cellular Proteomics*. 2008;7(4):684-96.
12. Lachman HM, Morrow B, Shprintzen R, Veit S, Parsia SS, Faedda G, et al. Association of codon 108/158 catechol-O-methyltransferase gene polymorphism with the psychiatric manifestations of velo-cardio-facial syndrome. *American Journal of Medical Genetics*. 1996;67(5):468-72.
13. MacLean B, Tomazela DM, Shulman N, Chambers M, Finney GL, Frewen B, et al. Skyline: an open source document editor for creating and analyzing targeted proteomics experiments. *Bioinformatics*. 2010;26(7):966-8.
14. Law CW, Chen Y, Shi W, Smyth GK. voom: Precision weights unlock linear model analysis tools for RNA-seq read counts. *Genome Biol*. 2014;15(2):R29.
15. Gandal MJ, Zhang P, Hadjimichael E, Walker RL, Chen C, Liu S, et al. Transcriptome-wide isoform-level dysregulation in ASD, schizophrenia, and bipolar disorder. *Science*. 2018;362(6420).
16. Psych EC, Akbarian S, Liu C, Knowles JA, Vaccarino FM, Farnham PJ, et al. The PsychENCODE project. *Nat Neurosci*. 2015;18(12):1707-12.
17. UniProt C. UniProt: a worldwide hub of protein knowledge. *Nucleic Acids Res*. 2019;47(D1):D506-D15.
